# Supplementary material
Source: publisher figshare collection journal article supplement (https://karger.figshare.com/articles/dataset/_/5442364)
Supplement: Supplementary file 1 [file 1]

Archive with 3 entries (3 files):
- Figure 1.pdf
- Table 1.xls
- Table 2.xls
