# Supplementary material
Source: publisher figshare collection journal article supplement (https://karger.figshare.com/articles/dataset/_/5442364)
Supplement: Supplementary file 1 [file 1 › Figure 1.pdf]

## GO Molecular Function Classification

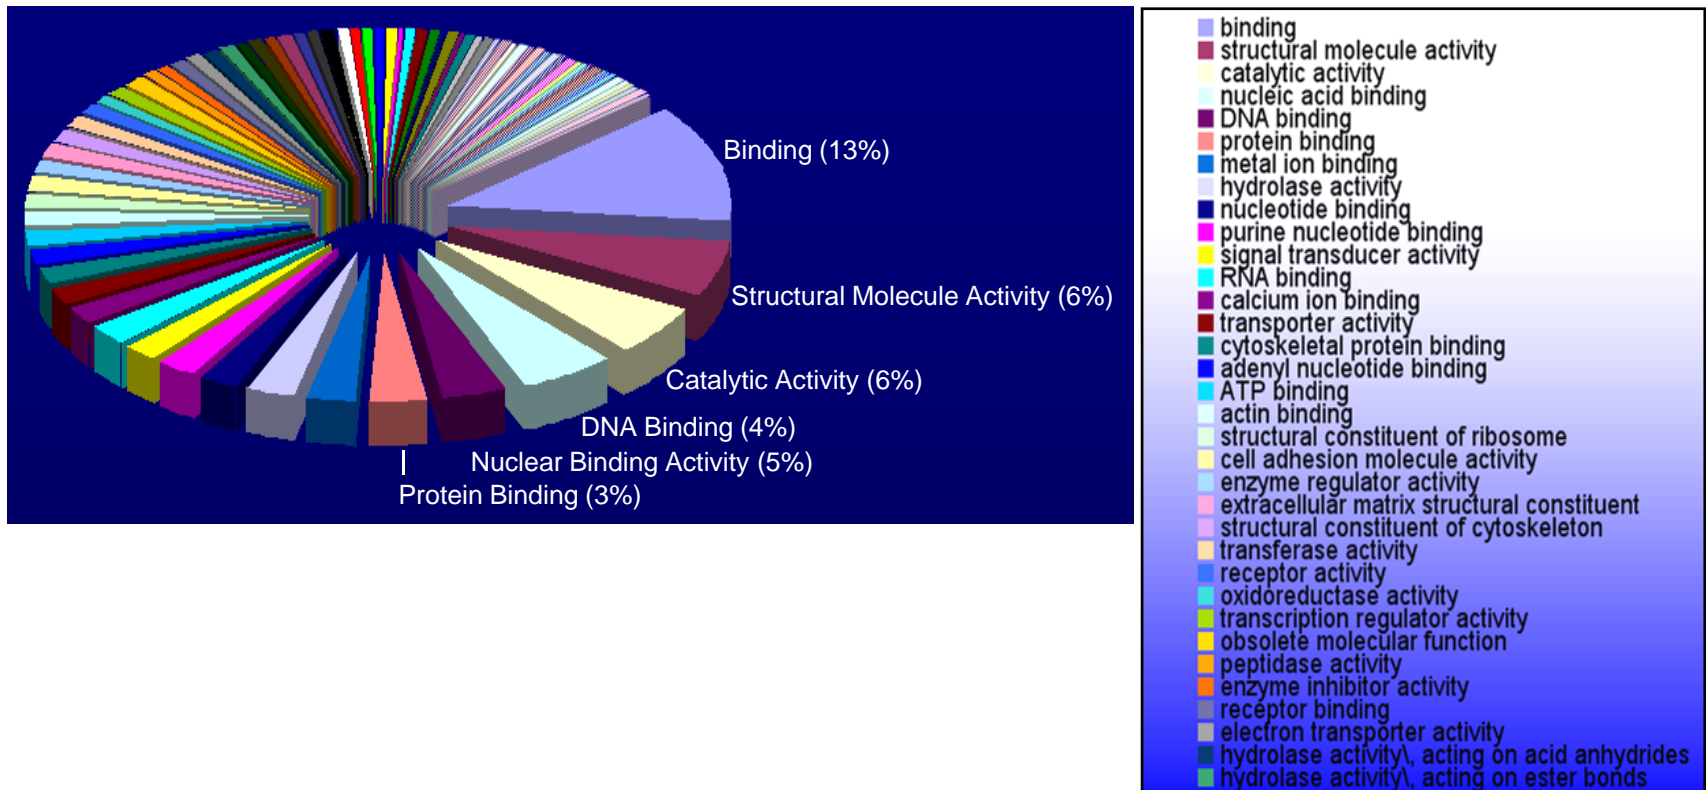

**Supplemental Figure 1:** Gene Ontology (GO) classification of molecular function for expressed proteins in the IPMN Liquid Tissue® lysate. The percentage of the six most common GO categories is illustrated.
