# Supplementary material
Source: publisher figshare collection journal article supplement (https://karger.figshare.com/articles/dataset/_/5442364)
Supplement: Supplementary file 1 [file 1 › Table 1.xls]

## Sheet: Unique Proteins
UniProt Accession	Total # of Peptides	_SYMBOL	NAME	Entrez_ID	Sequence_ID	Unigene	Cytoband	Pathways	Ontology	Motifs	GO Function	GO Process	GO Component
P02452	32	COL1A1	Collagen, type I, alpha 1	1277	NM_000088	Hs.709197	17q21.33	Cell Communication|ECM-receptor interaction|Focal adhesion	###############################################################################################################################################################################################################################################################	COLFI|Collagen|VWC	extracellular matrix structural constituent, structural constituent of bone	epidermis development, phosphate transport, sensory perception of sound, skeletal development	collagen, collagen type I, cytoplasm
P05787	22	KRT8	Keratin 8	3856	NM_002273	Hs.533782	12q13				protein binding, structural molecule activity, structural molecule activity	cytoskeleton organization and biogenesis	intermediate filament, intermediate filament
P08670	21	VIM	Vimentin	7431	NM_003380	Hs.642813	10p13	Cell Communication	cell motility|cytoplasm|cytoskeleton|intermediate filament|intermediate filament-based process|protein binding|structural constituent of cytoskeleton|structural molecule activity|	Filament|Filament_head	oxygen transporter activity, protein binding, protein binding, structural constituent of cytoskeleton, structural molecule activity	biological process unknown, cell motility, oxygen transport	cytoplasm, cytoskeleton, intermediate filament, intermediate filament
P08123	19	COL1A2	Collagen, type I, alpha 2	1278	NM_000089	Hs.489142	7q22.1	Cell Communication|ECM-receptor interaction|Focal adhesion	###############################################################################################################################################################################################################################################################	COLFI|Collagen	extracellular matrix structural constituent, extracellular matrix structural constituent, structural constituent of bone	biological process unknown, phosphate transport, sensory perception of sound, skeletal development	collagen, collagen type I, collagen type I, cytoplasm
P62805	13	HIST2H4B	Histone cluster 2, H4b	554313	NM_001034077	Hs.706635	1q21		DNA binding|chromosome|establishment and/or maintenance of chromatin architecture|nucleosome|nucleosome assembly|nucleus|phosphoinositide-mediated signaling|protein binding|
Q2KHP4	12	HSPA5	Heat shock 70kDa protein 5 (glucose-regulated protein, 78kDa)	3309	NM_005347	Hs.605502	9q33-q34.1	Antigen processing and presentation|MAPK signaling pathway|Neurodegenerative Disorders|Prion Pathway|Prion disease|Stathmin and breast cancer resistance to antimicrotubule agents	ATP binding|cell surface|endoplasmic reticulum|endoplasmic reticulum lumen|nucleotide binding|protein binding|protein binding, bridging|	HSP70	ATP binding, calcium ion binding, caspase inhibitor activity, nucleotide binding, protein binding, bridging, unfolded protein binding	anti-apoptosis, anti-apoptosis, negative regulation of caspase activity	ER-Golgi intermediate compartment, caspase complex, cell surface, endoplasmic reticulum lumen, integral to endoplasmic reticulum membrane, nucleus, perinuclear region
P15086	9	CPB1	Carboxypeptidase B1 (tissue)	1360	NM_001871	Hs.477891	3q24		carboxypeptidase A activity|carboxypeptidase B activity|carboxypeptidase activity|extracellular region|metal ion binding|metallopeptidase activity|proteolysis|zinc ion binding|	Peptidase_M14|Propep_M14	carboxypeptidase A activity, carboxypeptidase B activity, carboxypeptidase activity, metal ion binding, metallopeptidase activity, zinc ion binding	proteolysis
P05787	8	KRT8	(xs11) mRNA, 393bp	3856	BG323224	Hs.708445	Unknown	Cell Communication	Z disc|cytoplasm|cytoskeleton organization and biogenesis|intermediate filament|protein binding|response to other organism|sarcolemma|structural molecule activity|		protein binding, structural molecule activity, structural molecule activity	cytoskeleton organization and biogenesis	intermediate filament, intermediate filament
P12111	8	COL6A3	Collagen, type VI, alpha 3	1293	NM_004369 NM_057164 NM_057165 NM_057166 NM_057167	Hs.233240	2q37	Cell Communication|ECM-receptor interaction|Focal adhesion	cell adhesion|collagen type VI|cytoplasm|extracellular region|muscle development|phosphate transport|protein binding|proteinaceous extracellular matrix|serine-type endopeptidase inhibitor activity|structural molecule activity|	Collagen|Kunitz_BPTI|VWA	protein binding, serine-type endopeptidase inhibitor activity, structural molecule activity	cell adhesion, muscle development, phosphate transport	collagen type VI, cytoplasm, extracellular matrix (sensu Metazoa)
P35579	8	MYH9	Myosin, heavy chain 9, non-muscle	4627	NM_002473	Hs.474751	22q13.1	Regulation of actin cytoskeleton|Tight junction	###############################################################################################################################################################################################################################################################	IQ|Myosin_N|Myosin_head|Myosin_tail_1	ATP binding, actin binding, calmodulin binding, motor activity, nucleotide binding	regulation of cell shape, sensory perception of sound	myosin
P16233	7	PNLIP	Pancreatic lipase	5406	NM_000936	Hs.501135	10q26.1	Glycerolipid metabolism	###############################################################################################################################################################################################################################################################	Lipase|PLAT	hydrolase activity, triacylglycerol lipase activity	lipid catabolism, triacylglycerol metabolism
P18206	7	VCL	Vinculin	7414	NM_014000 NM_003373	Hs.709207	10q22.1-q23	Adherens junction|Cell to Cell Adhesion Signaling|Focal adhesion|Integrin Signaling Pathway|Leukocyte transendothelial migration|Regulation of actin cytoskeleton|Rho cell motility signaling pathway	###############################################################################################################################################################################################################################################################	Vinculin	actin binding, alpha-catenin binding, oxidoreductase activity, structural molecule activity	apical junction assembly, cell adhesion, cell motility, lamellipodium biogenesis, negative regulation of cell migration	actin cytoskeleton, adherens junction, cell-matrix junction, costamere, focal adhesion, intercellular junction, protein complex
Q8NFW1	7	COL22A1	Collagen, type XXII, alpha 1	169044	NM_152888	Hs.117169	8q24.23		cell adhesion|cytoplasm|phosphate transport|structural molecule activity|	Collagen|VWA
P02461	6	COL3A1	Transcribed locus	1281	BG573051	Hs.708235	Unknown	Cell Communication|ECM-receptor interaction|Focal adhesion	###############################################################################################################################################################################################################################################################		extracellular matrix structural constituent	circulation, organ morphogenesis, phosphate transport	collagen, collagen type III, cytoplasm
P08572	6	COL4A2	Collagen, type IV, alpha 2	1284	NM_001846	Hs.508716	13q34	Cell Communication|ECM-receptor interaction|Focal adhesion	binding|collagen|collagen type IV|cytoplasm|extracellular matrix organization and biogenesis|extracellular matrix structural constituent|extracellular region|negative regulation of angiogenesis|phosphate transport|	C4|Collagen	extracellular matrix structural constituent, extracellular matrix structural constituent	extracellular matrix organization and biogenesis, phosphate transport	collagen, collagen type IV, cytoplasm
P11047	6	LAMC1	Laminin, gamma 1 (formerly LAMB2)	3915	NM_002293	Hs.609663	1q31	Cell Communication|ECM-receptor interaction|Focal adhesion|Prion Pathway|Prion disease	###############################################################################################################################################################################################################################################################	DSL|EGF|EGF_2|Laminin_B|Laminin_EGF|Laminin_N	extracellular matrix structural constituent, protein binding	cell adhesion, endoderm development, positive regulation of epithelial cell proliferation, protein complex assembly	basement membrane, laminin-1
P14625	6	HSP90B1	Heat shock protein 90kDa beta (Grp94), member 1	7184	NM_003299	Hs.192374	12q24.2-q24.3		###############################################################################################################################################################################################################################################################	HATPase_c|HSP90	ATP binding, RNA binding, calcium ion binding, low-density lipoprotein receptor binding, unfolded protein binding, virion binding	anti-apoptosis, anti-apoptosis, protein folding, protein transport, response to hypoxia, sequestering of calcium ion	cytosol, endoplasmic reticulum lumen, endoplasmic reticulum membrane, microsome, perinuclear region
Q09666	6	AHNAK	AHNAK nucleoprotein	79026	NM_001620 NM_024060	Hs.502756	11q12.2		nervous system development|nucleus|protein binding|	CheC|ETF_alpha|PDZ		nervous system development	nucleus
P00558	5	PGK1	Phosphoglycerate kinase 1	5230	NM_000291	Hs.701989	Xq13	Carbon fixation|Glycolysis / Gluconeogenesis|Glycolysis Pathway	ATP binding|cytoplasm|glycolysis|nucleotide binding|phosphoglycerate kinase activity|phosphorylation|transferase activity|	PGK	ATP binding, phosphoglycerate kinase activity, transferase activity	glycolysis, phosphorylation
P01024	5	C3	Complement component 3	718	NM_000064	Hs.529053	19p13.3-p13.2	Alternative Complement Pathway|Cells and Molecules involved in local acute inflammatory response|Complement Pathway|Complement and coagulation cascades|Lectin Induced Complement Pathway	###############################################################################################################################################################################################################################################################	A2M|A2M_N|A2M_N_2|A2M_comp|A2M_recep|ANATO|NTR	endopeptidase inhibitor activity, receptor binding	G-protein coupled receptor protein signaling pathway, complement activation, alternative pathway, complement activation, classical pathway, inflammatory response, innate immune response, signal transduction	extracellular region
P06396	5	GSN	Gelsolin	2934	NM_000177 NM_198252	Hs.522373	9q33				actin binding, calcium ion binding, protein binding	actin filament polymerization, actin filament severing, barbed-end actin filament capping	actin cytoskeleton, cytosol, extracellular region, extracellular region
P25705	5	ATP5A1	ATP synthase, H+ transporting, mitochondrial F1 complex, alpha subunit 1, cardiac muscle	498	NM_001001937 NM_004046	Hs.298280	18q12-q21	ATP synthesis|Electron Transport Reaction in Mitochondria|Oxidative phosphorylation	###############################################################################################################################################################################################################################################################	ATP-synt_ab|ATP-synt_ab_C|ATP-synt_ab_N	ATP binding, hydrolase activity, metal ion binding, nucleotide binding, protein binding, transporter activity	ATP synthesis coupled proton transport, ion transport, proton transport	membrane fraction, mitochondrion, proton-transporting two-sector ATPase complex
P51884	5	LUM	Lumican	4060	NM_002345	Hs.406475	12q21.3-q22		collagen binding|collagen fibril organization|extracellular matrix structural constituent|extracellular region|fibrillar collagen|proteinaceous extracellular matrix|visual perception|	LRRNT|LRR_1	collagen binding, extracellular matrix structural constituent	collagen fibril organization, visual perception	extracellular matrix (sensu Metazoa), fibrillar collagen
Q8IVL0	5	NAV3	Neuron navigator 3	89795	NM_014903	Hs.655301	12q14.3		ATP binding|membrane|nuclear outer membrane|nucleoside-triphosphatase activity|nucleotide binding|nucleus|transport|	AAA|AAA_2|AAA_5|CH|DEAD|IstB|NACHT|PhoH
Q9Y6C2	5	EMILIN1	Elastin microfibril interfacer 1	11117	NM_007046	Hs.63348	2p23.3-p23.2		cell adhesion|cytoplasm|extracellular matrix constituent conferring elasticity|extracellular matrix structural constituent|extracellular region|identical protein binding|phosphate transport|protein binding|proteinaceous extracellular matrix|	C1q|Collagen|EMI	extracellular matrix structural constituent, protein binding	cell adhesion, phosphate transport	cytoplasm, extracellular matrix (sensu Metazoa)
P07237	4	P4HB	Procollagen-proline, 2-oxoglutarate 4-dioxygenase (proline 4-hydroxylase), beta polypeptide	5034	NM_000918	Hs.464336	17q25	Hypoxia-Inducible Factor in the Cardiovascular System|Vitamin C in the Brain	###############################################################################################################################################################################################################################################################	Thioredoxin	isomerase activity, procollagen-proline 4-dioxygenase activity, protein disulfide isomerase activity	electron transport, peptidyl-proline hydroxylation to 4-hydroxy-L-proline	ER-Golgi intermediate compartment, cell surface, endoplasmic reticulum, extracellular region
P08727	4	KRT19	Keratin 19	3880	NM_002276	Hs.654568	17q21.2	Cell Communication	Z disc|costamere|intermediate filament|protein binding|response to estrogen stimulus|sarcolemma|sarcomere organization|structural constituent of cytoskeleton|structural constituent of muscle|structural molecule activity|	Filament	protein binding, structural constituent of cytoskeleton, structural constituent of muscle, structural molecule activity	sarcomere organization	costamere, intermediate filament, intermediate filament
P08729	4	KRT7	Keratin 7	3855	BC042076	Hs.670221	12q12-q13	Cell Communication	DNA replication|cytoplasm|cytoskeleton organization and biogenesis|intermediate filament|interphase|protein binding|regulation of translation|structural molecule activity|		structural molecule activity	cytoskeleton organization and biogenesis	intermediate filament
P12109	4	COL6A1	Collagen, type VI, alpha 1	1291	NM_001848	Hs.474053	21q22.3	Cell Communication|ECM-receptor interaction|Focal adhesion	cell adhesion|collagen|collagen type VI|cytoplasm|extracellular matrix structural constituent|extracellular region|phosphate transport|protein binding|proteinaceous extracellular matrix|structural molecule activity|	Collagen|VWA	extracellular matrix structural constituent, molecular function unknown, protein binding	cell adhesion, cell adhesion, phosphate transport	collagen, collagen type VI, cytoplasm
P21980	4	TGM2	Transglutaminase 2 (C polypeptide, protein-glutamine-gamma-glutamyltransferase)	7052	NM_004613 NM_198951	Hs.517033	20q12	Huntington's disease|Phospholipase C d1 in phospholipid associated cell signaling	###############################################################################################################################################################################################################################################################	Transglut_C|Transglut_N|Transglut_core	GTP binding, acyltransferase activity, calcium ion binding, protein-glutamine gamma-glutamyltransferase activity, transferase activity	G-protein coupled receptor protein signaling pathway, peptide cross-linking, positive regulation of cell adhesion	cytosol, extracellular matrix (sensu Metazoa), membrane
P35555	4	FBN1	Fibrillin 1	2200	NM_000138	Hs.591133	15q21.1		###############################################################################################################################################################################################################################################################	CBM_14|C_tripleX|Defensin_beta|Dickkopf_N|EB|EGF|EGF_2|EGF_CA|Granulin|Laminin_EGF|Plasmod_Pvs28|TB|TIL|VSP	calcium ion binding, calcium ion binding, extracellular matrix structural constituent, transmembrane receptor activity	blood coagulation, development, skeletal development, visual perception	extracellular matrix (sensu Metazoa), extracellular space, membrane
Q05682	4	CALD1	Caldesmon 1	800	NM_033138 NM_033157 NM_004342 NM_033139 NM_033140	Hs.490203	7q33		actin binding|calmodulin binding|cell motility|cytoskeleton|muscle contraction|muscle development|myosin binding|tropomyosin binding|	Caldesmon	actin binding, actin binding, calmodulin binding, calmodulin binding, myosin binding, tropomyosin binding	cell motility, muscle contraction	cytoskeleton
Q15084	4	PDIA6	Protein disulfide isomerase family A, member 6	10130	NM_005742	Hs.212102	2p25.1		ER-Golgi intermediate compartment|cell redox homeostasis|endoplasmic reticulum|endoplasmic reticulum lumen|isomerase activity|melanosome|protein binding|protein disulfide isomerase activity|protein folding|	Thioredoxin	isomerase activity, protein disulfide isomerase activity	electron transport, protein folding	ER-Golgi intermediate compartment, endoplasmic reticulum
Q71U36	4	TUBA1A	Tubulin alpha-1A chain - Homo sapiens (Human)	7846	NM_006009	Hs.654422	12q12-q14.3
P00352	3	ALDH1A1	Aldehyde dehydrogenase 1 family, member A1	216	NM_000689	Hs.76392	9q21.13	Retinol metabolism	Ras GTPase activator activity|aldehyde dehydrogenase (NAD) activity|aldehyde metabolic process|androgen binding|cytoplasm|cytosol|metabolic process|oxidoreductase activity|retinal dehydrogenase activity|	Aldedh	aldehyde dehydrogenase (NAD) activity, androgen binding, oxidoreductase activity, retinal dehydrogenase activity	aldehyde metabolism, metabolism	cytosol
P02647	3	APOA1	Apolipoprotein A-I	335	NM_000039	Hs.633003	11q23-q24	Mechanism of Gene Regulation by Peroxisome Proliferators via PPARa(alpha)|PPAR signaling pathway	###############################################################################################################################################################################################################################################################	Apolipoprotein	high-density lipoprotein binding, lipid binding, lipid transporter activity, protein binding	cholesterol metabolism, cholesterol transport, circulation, lipid metabolism, lipid transport, lipoprotein metabolism, steroid metabolism	extracellular space
P06576	3	ATP5B	ATP synthase, H+ transporting, mitochondrial F1 complex, beta polypeptide	506	NM_001686	Hs.406510	12q13.13	ATP synthesis|Oxidative phosphorylation	###############################################################################################################################################################################################################################################################	ATP-synt_ab|ATP-synt_ab_C|ATP-synt_ab_N	ATP binding, hydrolase activity, metal ion binding, nucleoside-triphosphatase activity, nucleotide binding, protein binding, transporter activity	ATP synthesis coupled proton transport, generation of precursor metabolites and energy, ion transport, proton transport	mitochondrion
P07477	3	PRSS1	Protease, serine, 1 (trypsin 1)	5644	NM_002769	Hs.709206	7q32-qter|7q34		calcium ion binding|digestion|extracellular region|hydrolase activity|peptidase activity|proteolysis|serine-type endopeptidase activity|trypsin activity|	Trypsin	calcium ion binding, hydrolase activity, peptidase activity, trypsin activity, trypsin activity	digestion, proteolysis	extracellular region
P07737	3	PFN1	Profilin 1	5216	NM_005022	Hs.494691	17p13.3	Erk and PI-3 Kinase Are Necessary for Collagen Binding in Corneal Epithelia|Regulation of actin cytoskeleton|Rho cell motility signaling pathway	actin cytoskeleton|actin cytoskeleton organization and biogenesis|actin monomer binding|cytoplasm|cytoskeleton organization and biogenesis|neural tube closure|nucleus|protein binding|regulation of transcription from RNA polymerase II promoter|	Profilin	actin monomer binding	actin cytoskeleton organization and biogenesis, cytoskeleton organization and biogenesis	actin cytoskeleton
P07954	3	FH	Fumarate hydratase	2271	NM_000143	Hs.592490	1q42.1	Citrate cycle (TCA cycle)|Reductive carboxylate cycle (CO2 fixation)	cell cycle|cytoplasm|fumarate hydratase activity|fumarate metabolic process|homeostasis of number of cells within a tissue|lyase activity|mitochondrion|negative regulation of cell cycle|tricarboxylic acid cycle|tricarboxylic acid cycle enzyme complex|	Lyase_1	fumarate hydratase activity, lyase activity	cell cycle, fumarate metabolism, negative regulation of progression through cell cycle, tricarboxylic acid cycle	mitochondrion, tricarboxylic acid cycle enzyme complex
P15085	3	CPA1	Carboxypeptidase A1 (pancreatic)	1357	NM_001868	Hs.2879	7q32		carboxypeptidase A activity|carboxypeptidase activity|extracellular region|extracellular space|metal ion binding|metallopeptidase activity|proteolysis|zinc ion binding|	Peptidase_M14|Propep_M14	carboxypeptidase A activity, carboxypeptidase activity, metal ion binding, metallopeptidase activity, zinc ion binding	proteolysis
P16401	3	HIST1H1B	Histone cluster 1, H1b	3009	NM_005322	Hs.131956	6p22-p21.3		DNA binding|chromosome|muscle development|nucleosome|nucleosome assembly|nucleus|protein binding|	Linker_histone	DNA binding	nucleosome assembly	chromosome, nucleosome, nucleus
P20908	3	COL5A1	Collagen, type V, alpha 1	1289	NM_000093	Hs.210283	9q34.2-q34.3	Cell Communication|ECM-receptor interaction|Focal adhesion	cell adhesion|collagen|collagen type V|cytoplasm|extracellular matrix structural constituent|extracellular region|heparin binding|phosphate transport|	COLFI|Collagen|Laminin_G_2	extracellular matrix structural constituent, heparin binding, structural molecule activity	cell adhesion, phosphate transport	collagen, collagen type V, cytoplasm
P27824	3	CANX	Calnexin	821	NM_001746 NM_001024649	Hs.699155	5q35	Antigen processing and presentation|ER–associated degradation (ERAD) Pathway	angiogenesis|calcium ion binding|cytoplasm|endoplasmic reticulum|endoplasmic reticulum membrane|integral to membrane|melanosome|membrane|protein folding|protein secretion|sugar binding|unfolded protein binding|	Calreticulin	calcium ion binding, calcium ion binding, sugar binding, unfolded protein binding, unfolded protein binding	protein folding, protein secretion	endoplasmic reticulum, endoplasmic reticulum, integral to membrane, membrane
P30086	3	PEBP1	Phosphatidylethanolamine binding protein 1	5037	NM_002567	Hs.700567	12q24.23	Signal transduction through IL1R	ATP binding|cytoplasm|lipid binding|nucleotide binding|phosphatidylethanolamine binding|protein binding|serine-type endopeptidase inhibitor activity|	PBP	ATP binding, lipid binding, nucleotide binding, phosphatidylethanolamine binding, serine-type endopeptidase inhibitor activity
P52272	3	HNRNPM	Heterogeneous nuclear ribonucleoprotein M	4670	BC045573	Hs.666214	19p13.3-p13.2		RNA binding|RNA splicing|integral to plasma membrane|membrane fraction|nuclear mRNA splicing, via spliceosome|nucleotide binding|nucleus|plasma membrane|protein binding|ribonucleoprotein complex|spliceosome|transmembrane receptor activity|
P60660	3	MYL6	Myosin, light chain 6, alkali, smooth muscle and non-muscle	4637	NM_021019 NM_079423	Hs.632717	12q13.2	Focal adhesion|Leukocyte transendothelial migration|Tight junction	actin-dependent ATPase activity|calcium ion binding|motor activity|muscle filament sliding|myosin complex|skeletal muscle development|structural constituent of muscle|unconventional myosin complex|	efhand	calcium ion binding, motor activity, structural constituent of muscle	muscle filament sliding, striated muscle development	unconventional myosin
P98160	3	HSPG2	Heparan sulfate proteoglycan 2	3339	NM_005529	Hs.707982	1p36.1-p34	ECM-receptor interaction	basement membrane|calcium ion binding|cell adhesion|extracellular region|extracellular space|protein binding|structural molecule activity|	EGF|I-set|Laminin_B|Laminin_EGF|Laminin_G_2|Ldl_recept_a|SEA|V-set|ig	structural molecule activity	cell adhesion	basement membrane, extracellular space
Q01955	3	COL4A3	Collagen, type IV, alpha 3 (Goodpasture antigen)	1285	NM_000091 NM_031362 NM_031365 NM_031366	Hs.570065	2q36-q37		###############################################################################################################################################################################################################################################################	C4|Collagen	extracellular matrix structural constituent, integrin binding, metalloendopeptidase inhibitor activity, protein binding, serine carboxypeptidase activity	caspase activation, cell adhesion, cell proliferation, cell surface receptor linked signal transduction, circulation, induction of apoptosis, negative regulation of angiogenesis, negative regulation of cell proliferation, phosphate transport, proteolysis,	collagen, collagen type IV, cytoplasm
Q05707	3	COL14A1	Collagen, type XIV, alpha 1	7373	NM_021110	Hs.409662	8q23		cell adhesion|cell-cell adhesion|collagen|collagen binding|collagen fibril organization|collagen type XIV|cytoplasm|extracellular matrix structural constituent|extracellular region|phosphate transport|protein binding|protein binding, bridging|	Collagen|VWA|fn3	extracellular matrix structural constituent, protein binding	cell adhesion, collagen fibril organization, phosphate transport	collagen, collagen type XIV, cytoplasm
Q15149	3	PLEC1	Plectin 1	5339	NM_000445	Hs.434248	8q24				actin binding, structural constituent of cytoskeleton, structural constituent of muscle	cytoskeletal anchoring	cytoskeleton, intermediate filament, plasma membrane
Q8N264	3	ARHGAP24	Rho GTPase activating protein 24	83478	NM_001025616 NM_031305 NM_001042669	Hs.444229	4q21.23-q21.3		GTPase activator activity|angiogenesis|cell differentiation|cell junction|cell projection|cytoplasm|cytoskeleton|intracellular|multicellular organismal development|protein binding|signal transduction|	PH|RhoGAP
A6NMY0	2	TLN1	Talin 1	7094	NM_006289	Hs.471014	9p13	###############################################################################################################################################################################################################################################################	LIM domain binding|actin binding|binding|cell motility|cell-cell junction assembly|cytoplasm|cytoskeletal anchoring|cytoskeleton|focal adhesion|intercellular junction|membrane|protein binding|ruffle|structural constituent of cytoskeleton|vinculin binding|	Band_41|I_LWEQ	LIM domain binding, actin binding, binding, protein binding, structural constituent of cytoskeleton, vinculin binding	cell motility, cytoskeletal anchoring, intercellular junction assembly	cytoskeleton, cytosol, focal adhesion, intercellular junction, ruffle
O60266	2	ADCY3	Adenylate cyclase 3	109	NM_004036	Hs.708074	2p23.3	Calcium signaling pathway|Gap junction|GnRH signaling pathway|Olfactory transduction|Purine metabolism	###############################################################################################################################################################################################################################################################	Guanylate_cyc	adenylate cyclase activity, calmodulin binding, magnesium ion binding	cAMP biosynthesis, intracellular signaling cascade, response to stimulus, sensory perception of smell	integral to plasma membrane, plasma membrane
P02786	2	TFRC	Transferrin receptor (p90, CD71)	7037	NM_003234	Hs.529618	3q29	Hematopoietic cell lineage|The role of FYVE-finger proteins in vesicle transport	###############################################################################################################################################################################################################################################################	PA|TFR_dimer	peptidase activity, receptor activity, transferrin receptor activity	endocytosis, iron ion homeostasis, iron ion transport, proteolysis	endosome, extracellular region, integral to plasma membrane, membrane
P04004	2	SEBOX	Vitronectin	7448	NM_000638 NM_001083896 NM_001080837	Hs.2257	17q11	Cell Communication|ECM-receptor interaction|Focal adhesion	catalytic activity|cell adhesion|cell-matrix adhesion|extracellular region|extracellular space|heparin binding|immune response|metal ion binding|protein binding|proteinaceous extracellular matrix|	Hemopexin|Somatomedin_B
P04075	2	ALDOA	Aldolase A, fructose-bisphosphate	226	NM_000034 NM_184043 NM_184041	Hs.513490	16p11.2	Carbon fixation|Downregulated of MTA-3 in ER-negative Breast Tumors|Fructose and mannose metabolism|Glycolysis / Gluconeogenesis|Pentose phosphate pathway	fructose metabolic process|fructose-bisphosphate aldolase activity|glycolysis|lyase activity|metabolic process|protein binding|striated muscle contraction|	Glycolytic	fructose-bisphosphate aldolase activity, lyase activity	fructose metabolism, glycolysis, striated muscle contraction
P04083	2	ANXA1	Annexin A1	301	NM_000700	Hs.494173	9q12-q21.2|9q12-q21.2	Corticosteroids and cardioprotection	###############################################################################################################################################################################################################################################################	Annexin	calcium ion binding, calcium ion binding, calcium-dependent phospholipid binding, phospholipase A2 inhibitor activity, phospholipase inhibitor activity, receptor binding	anti-apoptosis, cell motility, cell surface receptor linked signal transduction, inflammatory response, lipid metabolism	cytoplasm
P05997	2	COL5A2	Collagen, type V, alpha 2	1290	NM_000393	Hs.445827	2q14-q32	Cell Communication|ECM-receptor interaction|Focal adhesion	collagen|collagen fibril organization|collagen type V|cytoplasm|extracellular matrix structural constituent|extracellular region|phosphate transport|skin development|	COLFI|Collagen|VWC	extracellular matrix structural constituent	phosphate transport	collagen, collagen type V, cytoplasm
P07339	2	CTSD	Similar to RIKEN cDNA 6330512M04 gene (mouse)	1509	NM_001909	Hs.654447	11p15.5	Downregulated of MTA-3 in ER-negative Breast Tumors	cathepsin D activity|extracellular region|lysosome|melanosome|mitochondrion|pepsin A activity|peptidase activity|proteolysis|	A1_Propeptide|Asp	cathepsin D activity, pepsin A activity, peptidase activity	proteolysis	extracellular region, lysosome
P12110	2	COL6A2	Collagen, type VI, alpha 2	1292	NM_058175 NM_001849 NM_058174	Hs.420269	21q22.3	Cell Communication|ECM-receptor interaction|Focal adhesion	cell-cell adhesion|collagen|cytoplasm|extracellular matrix organization and biogenesis|extracellular matrix structural constituent|extracellular region|membrane|phosphate transport|protein binding, bridging|proteinaceous extracellular matrix|	Collagen|VWA	extracellular matrix structural constituent, protein binding, bridging	cell-cell adhesion, extracellular matrix organization and biogenesis, phosphate transport	collagen, cytoplasm
P13639	2	EEF2	Eukaryotic translation elongation factor 2	1938	NM_001961	Hs.515070	19pter-q12	Eukaryotic protein translation	GTP binding|GTPase activity|cytoplasm|nucleotide binding|protein binding|translation|translation elongation factor activity|	EFG_C|EFG_IV|GTP_EFTU|GTP_EFTU_D2	GTP binding, nucleotide binding, translation elongation factor activity	protein biosynthesis
P13667	2	PDIA4	Protein disulfide isomerase family A, member 4	9601	NM_004911	Hs.93659	7q35		calcium ion binding|cell redox homeostasis|endoplasmic reticulum|endoplasmic reticulum lumen|isomerase activity|melanosome|protein binding|protein disulfide isomerase activity|protein secretion|	Thioredoxin	calcium ion binding, isomerase activity, protein disulfide isomerase activity	electron transport, protein secretion	endoplasmic reticulum lumen
P14867	2	GABRA1	Gamma-aminobutyric acid (GABA) A receptor, alpha 1	2554	NM_000806	Hs.175934	5q34-q35	Neuroactive ligand-receptor interaction	###############################################################################################################################################################################################################################################################	Neur_chan_LBD|Neur_chan_memb	GABA-A receptor activity, extracellular ligand-gated ion channel activity, ion channel activity, neurotransmitter receptor activity	chloride transport, gamma-aminobutyric acid signaling pathway, ion transport	integral to plasma membrane, postsynaptic membrane
P16260	2	SLC25A16	Solute carrier family 25 (mitochondrial carrier; Graves disease autoantigen), member 16	8034	NM_152707	Hs.180408	10q21.3		binding|integral to membrane|membrane|mitochondrial inner membrane|mitochondrion|solute:solute antiporter activity|transport|	Mito_carr	binding, solute:solute antiporter activity	transport, transport	integral to membrane, membrane, mitochondrial inner membrane, mitochondrial inner membrane, mitochondrion
P23246	2	SFPQ	Splicing factor proline/glutamine-rich (polypyrimidine tract binding protein associated)	6421	NM_005066	Hs.355934	1p34.3	RNA polymerase III transcription	DNA binding|DNA recombination|DNA repair|RNA binding|RNA splicing|mRNA processing|nuclear mRNA splicing, via spliceosome|nuclear matrix|nucleotide binding|nucleus|protein binding|regulation of transcription, DNA-dependent|transcription|	NOPS|RRM_1	DNA binding, RNA binding, nucleotide binding, protein binding	DNA recombination, DNA repair, RNA splicing, nuclear mRNA splicing, via spliceosome, regulation of transcription, DNA-dependent, transcription	nucleus
P23396	2	RPS3	Ribosomal protein S3	6188	NM_001005	Hs.546286	11q13.3-q13.5	Ribosome	RNA binding|cytoplasm|cytosolic small ribosomal subunit|intracellular|nucleic acid binding|protein binding|ribosome|small ribosomal subunit|structural constituent of ribosome|translation|	KH_2|Ribosomal_S3_C	RNA binding, structural constituent of ribosome	protein biosynthesis	cytosolic small ribosomal subunit (sensu Eukaryota)
P23528	2	CFL1	Cofilin 1 (non-muscle)	1072	NM_005507	Hs.170622	11q13	Axon guidance|CCR3 signaling in Eosinophils|Rac 1 cell motility signaling pathway|Regulation of actin cytoskeleton|Rho cell motility signaling pathway	Rho protein signal transduction|actin binding|actin cytoskeleton organization and biogenesis|anti-apoptosis|cytoplasm|cytoskeleton|intracellular|nuclear matrix|nucleus|protein binding|	Cofilin_ADF	actin binding, protein binding	Rho protein signal transduction, actin cytoskeleton organization and biogenesis, anti-apoptosis	cytoplasm, cytoskeleton, nucleus
P27797	2	CALR	Calreticulin	811	NM_004343	Hs.515162	19p13.3-p13.2	Antigen processing and presentation|NFAT and Hypertrophy of the heart (Transcription in the broken heart)	###############################################################################################################################################################################################################################################################	Calreticulin	DNA binding, calcium ion binding, sugar binding, unfolded protein binding, zinc ion binding	calcium ion homeostasis, protein export from nucleus, protein folding, regulation of apoptosis, regulation of transcription, DNA-dependent	cytosol, endoplasmic reticulum lumen
P30041	2	PRDX6	Peroxiredoxin 6	9588	NM_004905	Hs.573688	1q25.1	2,4-Dichlorobenzoate degradation|Alkaloid biosynthesis II|Butanoate metabolism|Methane metabolism|Phenylalanine metabolism|Stilbene, coumarine and lignin biosynthesis	cytoplasm|cytoplasmic vesicle|cytosol|hydrolase activity|lipid catabolic process|lysosome|oxidoreductase activity|peroxidase activity|peroxiredoxin activity|phospholipase A2 activity|phospholipid catabolic process|response to oxidative stress|	AhpC-TSA	hydrolase activity, oxidoreductase activity, peroxidase activity, phospholipase A2 activity	lipid catabolism, phospholipid catabolism, response to oxidative stress	cytosol, lysosome
P30101	2	PDIA3	Transcribed locus, moderately similar to NP_005304.3 protein disulfide isomerase-associated 3 precursor [Homo sapiens]	2923	BG678371	Hs.705701	Unknown	Antigen processing and presentation	###############################################################################################################################################################################################################################################################		cysteine-type endopeptidase activity, isomerase activity, phospholipase C activity, protein disulfide isomerase activity	electron transport, protein import into nucleus, protein retention in ER, signal transduction	endoplasmic reticulum
P51888	2	PRELP	Proline/arginine-rich end leucine-rich repeat protein	5549	NM_002725 NM_201348	Hs.632481	1q32		extracellular matrix structural constituent|extracellular region|protein binding|proteinaceous extracellular matrix|skeletal development|	LRRNT|LRR_1	extracellular matrix structural constituent	skeletal development	extracellular matrix (sensu Metazoa)
P52565	2	ARHGDIA	Rho GDP Dissociation Inhibitor alpha	396	NM_004309	Hs.159161	17q25.3				GTPase activator activity, Rho GDP-dissociation inhibitor activity, protein binding	Rho protein signal transduction, anti-apoptosis, cell motility, negative regulation of cell adhesion	cytoplasm, cytoskeleton
P55212	2	CASP6	Caspase 6, apoptosis-related cysteine peptidase	839	NM_001226 NM_032992	Hs.654616	4q25	###############################################################################################################################################################################################################################################################	apoptosis|caspase activity|cysteine-type peptidase activity|cytoplasm|induction of apoptosis|protein binding|proteolysis|	Peptidase_C14	caspase activity, cysteine-type peptidase activity, protein binding	apoptosis, induction of apoptosis, proteolysis
P55899	2	FCGRT	Fc fragment of IgG, receptor, transporter, alpha	2217	NM_004107	Hs.111903	19q13.3		IgG binding|MHC class I protein complex|antigen processing and presentation|female pregnancy|immune response|integral to membrane|plasma membrane|receptor activity|	C1-set|MHC_I	IgG binding, MHC class I receptor activity, receptor activity	antigen presentation, pregnancy	MHC class I protein complex, integral to membrane, membrane
P78527	2	PRKDC	Protein kinase, DNA-activated, catalytic polypeptide	5591	NM_006904 NM_001081640	Hs.491682	8q11	Cell Cycle: G2/M Checkpoint|Cell cycle|FAS signaling pathway ( CD95 )|HIV-I Nef: negative effector of Fas and TNF|TNFR1 Signaling Pathway	###############################################################################################################################################################################################################################################################	FAT|FATC|HEAT|NUC194|PI3_PI4_kinase	ATP binding, DNA binding, DNA-dependent protein kinase activity, protein binding, transferase activity	DNA recombination, protein modification	nucleus
P80303	2	NUCB2	Nucleobindin 2	4925	NM_005013	Hs.654599	11p15.1-p14		DNA binding|ER-Golgi intermediate compartment|calcium ion binding|cytoplasm|cytosol|endoplasmic reticulum|extracellular region|extracellular space|nuclear outer membrane|nucleus|plasma membrane|	efhand	DNA binding, calcium ion binding		ER-Golgi intermediate compartment, cytosol, extracellular space, plasma membrane
Q07065	2	CKAP4	Cytoskeleton-associated protein 4	10970	NM_006825	Hs.74368	12q23.3		ER-Golgi intermediate compartment membrane|endoplasmic reticulum|integral to membrane|membrane|membrane fraction|				integral to membrane, membrane fraction
Q07955	2	SFRS1	Splicing factor, arginine/serine-rich 1 (splicing factor 2, alternate splicing factor)	6426	NM_001078166 NM_006924	Hs.68714	17q21.3-q22		RNA binding|RNA splicing|cytoplasm|mRNA processing|mRNA splice site selection|nuclear mRNA splicing, via spliceosome|nuclear speck|nucleotide binding|nucleus|protein binding|spliceosome|	RRM_1	RNA binding, nucleotide binding, protein binding	mRNA splice site selection, nuclear mRNA splicing, via spliceosome	nucleus
Q14103	2	HNRNPD	Heterogeneous nuclear ribonucleoprotein D (AU-rich element RNA binding protein 1, 37kDa)	3184	NM_031370 NM_031369 NM_002138 NM_001003810	Hs.480073	4q21.1-q21.2		###############################################################################################################################################################################################################################################################	NID|RRM_1
Q14517	2	FAT	FAT tumor suppressor homolog 1 (Drosophila)	2195	NM_005245	Hs.481371	4q35		###############################################################################################################################################################################################################################################################	Cadherin|Cadherin_2|EGF|EGF_2|EGF_CA|Laminin_G_1|Laminin_G_2|PKD	calcium ion binding, protein binding	cell adhesion, cell-cell signaling, homophilic cell adhesion, morphogenesis	integral to plasma membrane, membrane
Q14667	2	KIAA0100	KIAA0100	9703	NM_014680	Hs.591189	17q11.2		extracellular region|malate dehydrogenase (acceptor) activity|tricarboxylic acid cycle|	Mqo	malate dehydrogenase (acceptor) activity	tricarboxylic acid cycle
Q5JPB2	2	ZNF831	Chromosome 20 open reading frame 174	128611	NM_178457	Hs.473204	20q13.32		intracellular|metal ion binding|nucleic acid binding|zinc ion binding|
Q5TH69	2	KIAA1244	KIAA1244	57221	NM_020340	Hs.656215	6q23.3		ARF guanyl-nucleotide exchange factor activity|integral to membrane|intracellular|membrane|regulation of ARF protein signal transduction|	HEAT|Peptidase_C6	ARF guanyl-nucleotide exchange factor activity		intracellular
Q6IBH5	2	PPIB	Peptidylprolyl isomerase B (cyclophilin B)	5479	NM_000942	Hs.434937	15q21-q22		endoplasmic reticulum|endoplasmic reticulum lumen|isomerase activity|melanosome|peptide binding|peptidyl-prolyl cis-trans isomerase activity|protein folding|unfolded protein binding|	Pro_isomerase	isomerase activity, peptide binding, peptidyl-prolyl cis-trans isomerase activity, unfolded protein binding	protein folding	endoplasmic reticulum lumen
Q6WRI0	2	IGSF10	Immunoglobulin superfamily, member 10	285313	NM_178822	Hs.708245	3q25.1		ATP binding|cell differentiation|extracellular region|multicellular organismal development|ossification|protein amino acid phosphorylation|protein binding|vascular endothelial growth factor receptor activity|	I-set|LRRNT|LRR_1|ig
Q6ZUF5	2	-	Similar to RIKEN cDNA 4632412N22 gene	165186	NM_199280	Hs.525977	2p23.2		binding|
Q86Y26	2	C15orf55	Chromosome 15 open reading frame 55	256646	NM_175741	Hs.525769	15q14		nucleus|
Q8IWQ3	2	BRSK2	BR serine/threonine kinase 2	9024	NM_003957	Hs.170819	11p15.5		ATP binding|establishment of cell polarity|kinase activity|magnesium ion binding|neuron differentiation|nucleotide binding|protein amino acid phosphorylation|protein serine/threonine kinase activity|protein tyrosine kinase activity|transferase activity|	Pkinase|Pkinase_Tyr	ATP binding, nucleotide binding, protein serine/threonine kinase activity, transferase activity	protein amino acid phosphorylation
Q8WVC6	2	DCAKD	Dephospho-CoA kinase domain containing	79877	NM_024819	Hs.463148	17q21.31		ATP binding|nucleotide binding|	CoaE	ATP binding
Q8WZ42	2	TTN	Titin	7273	NM_133378 NM_133437 NM_133432 NM_003319 NM_133379	Hs.654592	2q31	Calcium signaling pathway|Focal adhesion|Regulation of actin cytoskeleton	ATP binding|Rho guanyl-nucleotide exchange factor activity|Z disc|actin binding|actin cytoskeleton|alpha-actinin binding|calmodulin binding|carbohydrate metabolic process|condensed nuclear chromosome|cysteine-type endopeptidase activity|cytoplasm|cytoskeleton|hematopoietin/interferon-class (D200-domain) cytokine receptor activity|heme binding|identical protein binding|immune response|intracellula…	Adeno_E3_CR1|Big_2|Big_3|Big_4|Biotin_carb_C|C1-set|C2-set|C2-set_2|CSD|Cadherin|ChlamPMP_M|DUF1508|DUF1654|DUF291|DUF397|EMP24_GP25L|F5_F8_type_C|Flavi_glycop_C|He_PIG|I-set|Kelch_1|PKD|PPAK|PPC|Pkinase|Pkinase_Tyr|V-set|Y_Y_Y|fn3|ig	ATP binding, ATP binding, alpha-actinin binding, calmodulin binding, identical protein binding, myosin binding, myosin binding, nucleotide binding, peroxidase activity, protein binding, protein serine/threonine kinase activity, protein serine/threonine ki	biological process unknown, carbohydrate metabolism, mitosis, muscle contraction, muscle contraction, myofibril assembly, protein amino acid autophosphorylation, protein amino acid phosphorylation, regulation of striated muscle contraction, response to ox	Z disc, Z disc, condensed nuclear chromosome, condensed nuclear chromosome, cytoskeleton, membrane, myofibril, myofibril
Q92917	2	GPKOW	G patch domain and KOW motifs	27238	NM_015698	Hs.503666	Xp11.23		biological_process|cellular_component|intracellular|molecular_function|nucleic acid binding|nucleus|	G-patch|KOW	molecular function unknown	biological process unknown	cellular component unknown
Q92945	2	KHSRP	KH-type splicing regulatory protein	8570	NM_003685	Hs.708128	19p13.3		###############################################################################################################################################################################################################################################################	KH_1|KH_2	DNA binding, nucleic acid binding	RNA splicing, mRNA export from nucleus, nuclear mRNA splicing, via spliceosome, regulation of transcription, DNA-dependent, transcription, transport	nucleus
Q9BVC6	2	TMEM109	Transmembrane protein 109	79073	NM_024092	Hs.13662	11q12.2		integral to membrane|membrane|nuclear outer membrane|nucleus|sarcoplasmic reticulum membrane|				integral to membrane, membrane
Q9H9Y2	2	BXDC5	Brix domain containing 5	80135	NM_025065	Hs.481202	1p22.3		nucleolus|nucleus|rRNA binding|rRNA processing|	Brix	rRNA binding	rRNA processing	nucleolus, nucleus
Q9NXV2	2	KCTD5	Potassium channel tetramerisation domain containing 5	54442	NM_018992	Hs.61960	16p13.3		cytoplasm|membrane|nucleus|potassium ion transport|protein binding|voltage-gated potassium channel activity|voltage-gated potassium channel complex|	K_tetra	protein binding, voltage-gated potassium channel activity	potassium ion transport	membrane, voltage-gated potassium channel complex
Q9UIF8	2	BAZ2B	Bromodomain adjacent to zinc finger domain, 2B	29994	NM_013450	Hs.470369	2q23-q24		DNA binding|metal ion binding|nucleus|protein binding|regulation of transcription, DNA-dependent|transcription|zinc ion binding|	Bromodomain|DDT|MBD|PHD	DNA binding, metal ion binding, protein binding, zinc ion binding	regulation of transcription, DNA-dependent, transcription	nucleus
Q9UKX5	2	ITGA11	Integrin, alpha 11	22801	NM_001004439	Hs.436416	15q23	ECM-receptor interaction|Focal adhesion|Regulation of actin cytoskeleton	calcium ion binding|cell adhesion|cell-matrix adhesion|collagen binding|integral to membrane|integrin complex|integrin-mediated signaling pathway|magnesium ion binding|membrane|muscle development|receptor activity|substrate-bound cell migration|	FG-GAP|Integrin_alpha2|VWA	calcium ion binding, collagen binding, magnesium ion binding, receptor activity	cell adhesion, cell-matrix adhesion, integrin-mediated signaling pathway, muscle development	integral to membrane, integrin complex, membrane
Q9Y276	2	BCS1L	BCS1-like (yeast)	617	NM_004328 NM_001079866	Hs.471401	2q33		###############################################################################################################################################################################################################################################################	AAA	ATP binding, nucleoside-triphosphatase activity, nucleotide binding, unfolded protein binding	energy derivation by oxidation of organic compounds, protein complex assembly, protein folding	integral to membrane, membrane, mitochondrion, respiratory chain complex III (sensu Eukaryota)
Q9Y4W6	2	AFG3L2	AFG3 ATPase family gene 3-like 2 (yeast)	10939	NM_006796	Hs.528996	18p11		###############################################################################################################################################################################################################################################################	AAA|FtsH_ext|Peptidase_M41	ATP binding, metal ion binding, metalloendopeptidase activity, nucleoside-triphosphatase activity, nucleotide binding, unfolded protein binding, zinc ion binding	protein catabolism, proteolysis	integral to membrane, membrane, mitochondrion
A0FGR9	1	FAM62C	Family with sequence similarity 62 (C2 domain containing), member C	83850	NM_031913	Hs.477711	3q22.3		integral to membrane|plasma membrane|	C2
A2RUC4	1	C2orf60	Chromosome 2 open reading frame 60	129450	NM_001039693	Hs.204619	2q33.1
A4D0W6	1	-	Similar to ribosomal protein L18; 60S ribosomal protein L18	392979	NM_001085391	Hs.695836	7q31.31|7q31.31-q31.32	Ribosome	intracellular|ribosome|structural constituent of ribosome|translation|
A4FU49	1	C1orf113	Chromosome 1 open reading frame 113	79729	NM_024676	Hs.524496	1p34.3
A4QMS5	1	-	Hypothetical LOC442421	442421	BC104192 BC104193 BC112986 BC112987	Hs.711525	9q12		G-protein coupled receptor protein signaling pathway|integral to membrane|prostaglandin E receptor activity|rhodopsin-like receptor activity|
A4QN17	1	KIAA1772	KIAA1772	80000	BC125017	Hs.149020	18q11.1-q11.2		integral to membrane|membrane|
A6PVL3	1	KNCN	Kinocilin	148930	NM_001097611	Hs.350764	1p33		integral to membrane|membrane|
A8K186	1	ZNF276	Zinc finger protein 276	92822	NM_001113525 NM_152287	Hs.290154	16q24.3		DNA binding|intracellular|metal ion binding|nucleus|regulation of transcription, DNA-dependent|transcription|zinc ion binding|	zf-AD|zf-C2H2	DNA binding, metal ion binding, zinc ion binding	regulation of transcription, DNA-dependent, transcription	nucleus
A8K5N0	1	TGFBR3	Transforming growth factor, beta receptor III	7049	NM_003243	Hs.482390	1p33-p32	ALK in cardiac myocytes|CTCF: First Multivalent Nuclear Factor|Role of Tob in T-cell activation	extracellular region|glycosaminoglycan binding|integral to membrane|multicellular organismal development|plasma membrane|receptor activity|signal transduction|transforming growth factor beta receptor signaling pathway|	Zona_pellucida	glycosaminoglycan binding, receptor activity	development, signal transduction	integral to membrane, membrane
A8K6X3	1	DDX46	DEAD (Asp-Glu-Ala-Asp) box polypeptide 46	9879	NM_014829	Hs.533245	5q31.1		ATP binding|ATP-dependent helicase activity|RNA binding|hydrolase activity|nucleotide binding|	DEAD|Helicase_C	ATP binding, ATP-dependent helicase activity, RNA binding, hydrolase activity, nucleotide binding	nuclear mRNA splicing, via spliceosome	nucleus
O00160	1	MYO1F	Myosin IF	4542	NM_012335	Hs.465818	19p13.3-p13.2		ATP binding|actin binding|biological_process|calmodulin binding|microfilament motor activity|motor activity|myosin complex|nucleotide binding|unconventional myosin complex|	ATP_bind_2|IQ|Myosin_TH1|Myosin_head|SH3_1|SH3_2	ATP binding, ATP binding, actin binding, calmodulin binding, microfilament motor activity, motor activity, nucleotide binding	biological process unknown	unconventional myosin
O00267	1	SUPT5H	Suppressor of Ty 5 homolog (S. cerevisiae)	6829	NM_003169 NM_001111020	Hs.631604	19q13		###############################################################################################################################################################################################################################################################	KOW|Supt5	negative transcription elongation factor activity, positive transcription elongation factor activity, protein binding, protein heterodimerization activity	RNA elongation from RNA polymerase II promoter, regulation of transcription, DNA-dependent, transcription	nucleus
O00444	1	PLK4	Polo-like kinase 4 (Drosophila)	10733	NM_014264	Hs.172052	4q28		ATP binding|nucleotide binding|protein amino acid phosphorylation|protein binding|protein serine/threonine kinase activity|protein tyrosine kinase activity|transferase activity|	Pkinase|Pkinase_Tyr	ATP binding, nucleotide binding, protein binding, protein serine/threonine kinase activity, protein-tyrosine kinase activity, transferase activity	protein amino acid phosphorylation, regulation of progression through cell cycle
O14556	1	GAPDHS	Glyceraldehyde-3-phosphate dehydrogenase, spermatogenic	26330	NM_014364	Hs.248017	19q13.12	Glycolysis / Gluconeogenesis	###############################################################################################################################################################################################################################################################	Gp_dh_C|Gp_dh_N	NAD binding, oxidoreductase activity	glucose metabolism, glycolysis, positive regulation of glycolysis, sperm motility
O14559	1	SNX26	Sorting nexin 26	115703	NM_052948	Hs.515364	19q13.12		GTPase activator activity|intracellular|phosphoinositide binding|protein binding|protein transport|signal transduction|	PX|RhoGAP|SH3_1|SH3_2	GTPase activator activity	protein transport
O14672	1	ADAM10	ADAM metallopeptidase domain 10	102	NM_001110	Hs.578508	15q2|15q22	Epithelial cell signaling in Helicobacter pylori infection|Generation of amyloid b-peptide by PS1	###############################################################################################################################################################################################################################################################	Disintegrin	SH2 domain binding, integrin binding, metal ion binding, metalloendopeptidase activity, protein homodimerization activity, protein kinase binding, zinc ion binding	Notch receptor processing, cell-cell signaling, constitutive protein ectodomain proteolysis, embryonic development (sensu Mammalia), integrin-mediated signaling pathway, negative regulation of cell adhesion, negative regulation of cell adhesion, nucleocyt	Golgi-associated vesicle, cell surface, integral to plasma membrane, membrane, nucleus
O14746	1	TERT	Telomerase reverse transcriptase	7015	NM_198253 NM_198255	Hs.492203	5p15.33	Role of nicotinic acetylcholine receptors in the regulation of apoptosis|Telomeres, Telomerase, Cellular Aging, and Immortality	###############################################################################################################################################################################################################################################################	RVT_1	DNA binding, RNA binding, RNA-directed DNA polymerase activity, telomeric DNA binding, telomeric template RNA reverse transcriptase activity, telomeric template RNA reverse transcriptase activity, transferase activity	RNA-dependent DNA replication, telomere maintenance	chromosome, telomeric region, nucleus, telomerase holoenzyme complex
O14771	1	ZNF213	Zinc finger protein 213	7760	NM_004220	Hs.115284	16p13.3		intracellular|metal ion binding|nucleus|regulation of transcription, DNA-dependent|transcription|transcription factor activity|zinc ion binding|	KRAB|SCAN|zf-C2H2	metal ion binding, transcription factor activity, zinc ion binding	regulation of transcription, DNA-dependent, transcription	nucleus
O14907	1	TAX1BP3	Tax1 (human T-cell leukemia virus type I) binding protein 3	30851	NM_014604	Hs.12956	17p13	Chaperones modulate interferon Signaling Pathway	ATP binding|Rho protein signal transduction|cytoplasm|integral to membrane|intracellular signaling cascade|ion channel activity|ion transport|membrane|negative regulation of Wnt receptor signaling pathway|nucleus|protein binding|receptor activity|	PDZ	ATP binding, ion channel activity, protein binding, receptor activity	intracellular signaling cascade, ion transport	cytoplasm, integral to membrane, membrane
O14917	1	PCDH17	Protocadherin 17	27253	NM_001040429	Hs.106511	13q21.1		calcium ion binding|cell adhesion|homophilic cell adhesion|integral to membrane|membrane|plasma membrane|protein binding|		calcium ion binding, protein binding	cell adhesion, homophilic cell adhesion	integral to membrane, membrane
O14976	1	GAK	Cyclin G associated kinase	2580	NM_005255	Hs.369607	4p16		###############################################################################################################################################################################################################################################################	DnaJ|Pkinase|Pkinase_Tyr	ATP binding, heat shock protein binding, kinase activity, nucleotide binding, protein kinase activity, protein serine/threonine kinase activity, transferase activity	cell cycle, protein amino acid phosphorylation, regulation of progression through cell cycle	Golgi stack, nucleus
O15016	1	TRIM66	Tripartite motif-containing 66	9866	XM_001716253	Hs.130836	11p15.4		###############################################################################################################################################################################################################################################################		metal ion binding, protein binding, zinc ion binding	regulation of transcription, DNA-dependent	intracellular
O15061	1	DMN	Desmuslin	23336	NM_145728 NM_015286	Hs.207106	15q26.3		cytoplasm|intermediate filament|protein binding|structural constituent of muscle|	Filament	protein binding, structural constituent of muscle		intermediate filament
Q9UGM3	1	DMBT1	Deleted in malignant brain tumors 1	1755	NM_004406	Hs.279611	10q25.3-q26.1				calcium-dependent protein binding, pattern recognition receptor activity, scavenger receptor activity, scavenger receptor activity	cell cycle, epithelial cell differentiation, induction of bacterial agglutination, innate immune response, negative regulation of progression through cell cycle	cytoplasm, extracellular region, membrane, phagocytic vesicle membrane
O43151	1	TET3	Hypothetical protein MGC22014	200424	NM_144993	Hs.516107	2p13.1		iron ion binding|regulation of transcription, DNA-dependent|transcription factor activity|
O43175	1	PHGDH	Phosphoglycerate dehydrogenase	26227	NM_006623	Hs.487296	1p12	Glycine, serine and threonine metabolism	###############################################################################################################################################################################################################################################################	2-Hacid_dh|2-Hacid_dh_C	NAD binding, oxidoreductase activity, phosphoglycerate dehydrogenase activity, transporter activity	L-serine biosynthesis, amino acid biosynthesis, brain development, metabolism, transport	extracellular region
O43187	1	IRAK2	Interleukin-1 receptor-associated kinase 2	3656	NM_001570	Hs.449207	3p25.3	Apoptosis|Signal transduction through IL1R	###############################################################################################################################################################################################################################################################	Death|Pkinase|Pkinase_Tyr	ATP binding, NF-kappaB-inducing kinase activity, identical protein binding, protein kinase activity	I-kappaB kinase/NF-kappaB cascade, inflammatory response, protein amino acid phosphorylation, signal transduction	cell surface
O43242	1	PSMD3	Proteasome (prosome, macropain) 26S subunit, non-ATPase, 3	5709	NM_002809	Hs.12970	17q12-q21.1	Proteasome	binding|cytosol|proteasome complex|protein binding|protein complex|	PCI|Rpn3_C	binding		cytosol, proteasome complex (sensu Eukaryota), protein complex
O43677	1	NDUFC1	NADH dehydrogenase (ubiquinone) 1, subcomplex unknown, 1, 6kDa	4717	NM_002494	Hs.84549	4q28.2-q31.1	Oxidative phosphorylation	NADH dehydrogenase (ubiquinone) activity|NADH dehydrogenase activity|membrane|mitochondrial electron transport, NADH to ubiquinone|mitochondrial respiratory chain complex I|mitochondrion|oxidation reduction|oxidoreductase activity|transport|		NADH dehydrogenase (ubiquinone) activity, NADH dehydrogenase activity, oxidoreductase activity	mitochondrial electron transport, NADH to ubiquinone	mitochondrion
O60658	1	PDE8A	Phosphodiesterase 8A	5151	NM_002605 NM_173454	Hs.9333	15q25.3	Purine metabolism	###############################################################################################################################################################################################################################################################	PAS|PDE8|PDEase_I|Response_reg	3',5'-cyclic-nucleotide phosphodiesterase activity, hydrolase activity, magnesium ion binding, manganese ion binding, two-component response regulator activity	cyclic nucleotide metabolism, regulation of transcription, DNA-dependent	cellular component unknown
O60755	1	GALR3	Galanin receptor 3	8484	NM_003614	Hs.158353	22q13.1	Neuroactive ligand-receptor interaction	###############################################################################################################################################################################################################################################################	7tm_1	galanin receptor activity, receptor activity, rhodopsin-like receptor activity	feeding behavior, learning and/or memory, negative regulation of adenylate cyclase activity, neuropeptide signaling pathway, signal transduction, synaptic transmission	integral to membrane, plasma membrane
O75031	1	HSF2BP	Heat shock transcription factor 2 binding protein	11077	NM_007031	Hs.406157	21q22.3		binding|cytoplasm|spermatogenesis|transcription from RNA polymerase II promoter|		binding	spermatogenesis, transcription from RNA polymerase II promoter
O75362	1	ZNF217	Zinc finger protein 217	7764	AK290350	Hs.711564	20q13.2		intracellular|metal ion binding|nucleus|regulation of transcription, DNA-dependent|transcription factor activity|zinc ion binding|		metal ion binding, transcription factor activity, zinc ion binding	regulation of transcription, DNA-dependent	nucleus
O75427	1	LRCH4	Leucine-rich repeats and calponin homology (CH) domain containing 4	4034	BC046135	Hs.633863	7q22		PML body|cytoplasm|negative regulation of transcription|nervous system development|protein binding|transcription repressor activity|			nervous system development
O75469	1	NR1I2	Nuclear receptor subfamily 1, group I, member 2	8856	NM_003889 NM_033013 NM_022002	Hs.7303	3q12-q13.3	Nuclear Receptors in Lipid Metabolism and Toxicity	###############################################################################################################################################################################################################################################################	Hormone_recep|zf-C4	metal ion binding, sequence-specific DNA binding, steroid hormone receptor activity, transcription coactivator activity, transcription factor activity, transcriptional repressor activity, zinc ion binding	negative regulation of transcription, regulation of transcription, DNA-dependent, signal transduction, steroid metabolism, transcription, xenobiotic metabolism	nucleus
O75581	1	LRP6	Low density lipoprotein receptor-related protein 6	4040	AK094666	Hs.658913	12p11-p13	Wnt signaling pathway|Wnt/LRP6 Signalling	Wnt receptor signaling pathway|endocytosis|integral to membrane|low-density lipoprotein receptor activity|multicellular organismal development|plasma membrane|protein binding|receptor activity|		protein binding, receptor activity	Wnt receptor signaling pathway, development, endocytosis	integral to membrane, plasma membrane
O75604	1	USP2	Ubiquitin specific peptidase 2	9099	NM_004205 NM_171997	Hs.524085	11q23.3		cysteine-type endopeptidase activity|cytoplasm|protein binding|ubiquitin cycle|ubiquitin thiolesterase activity|ubiquitin-dependent protein catabolic process|	UCH	cysteine-type endopeptidase activity, cysteine-type endopeptidase activity, protein binding, ubiquitin thiolesterase activity	ubiquitin cycle, ubiquitin-dependent protein catabolism
O75808	1	SOLH	Small optic lobes homolog (Drosophila)	6650	NM_005632	Hs.632219	16p13.3		calcium-dependent cysteine-type endopeptidase activity|intracellular|metal ion binding|proteolysis|transcription factor activity|zinc ion binding|	Peptidase_C2|zf-RanBP	calpain activity, transcription factor activity, zinc ion binding	proteolysis	intracellular
O75822	1	EIF3J	Eukaryotic translation initiation factor 3, subunit J	8669	NM_003758	Hs.404056	15q15.3		eukaryotic translation initiation factor 3 complex|protein binding|regulation of translational initiation|translation|translation initiation factor activity|	eIF3_subunit
O75896	1	TUSC2	Tumor suppressor candidate 2	11334	NM_007275	Hs.517981	3p21.3		cell proliferation|cell-cell signaling|negative regulation of cell cycle|protein binding|			cell cycle, cell proliferation, cell-cell signaling, negative regulation of progression through cell cycle
O75914	1	PAK3	P21 (CDKN1A)-activated kinase 3	5063	NM_002578	Hs.656789	Xq22.3-q23	Axon guidance|Focal adhesion|Regulation of actin cytoskeleton|T cell receptor signaling pathway	ATP binding|magnesium ion binding|multicellular organismal development|nucleotide binding|protein amino acid phosphorylation|protein binding|protein serine/threonine kinase activity|transferase activity|	PBD|Pkinase|Pkinase_Tyr	ATP binding, magnesium ion binding, nucleotide binding, protein serine/threonine kinase activity, transferase activity	development, protein amino acid phosphorylation
O76074	1	PDE5A	Phosphodiesterase 5A, cGMP-specific	8654	NM_001083 NM_033430 NM_033437	Hs.647971	4q25-q27	Purine metabolism	###############################################################################################################################################################################################################################################################	GAF|PDEase_I	3',5'-cyclic-GMP phosphodiesterase activity, 3',5'-cyclic-nucleotide phosphodiesterase activity, cGMP binding, catalytic activity, hydrolase activity, magnesium ion binding, nucleotide binding, zinc ion binding	biological process unknown, cyclic nucleotide metabolism, signal transduction, signal transduction	cellular component unknown
O94851	1	MICAL2	Microtubule associated monoxygenase, calponin and LIM domain containing 2	9645	NM_014632	Hs.501928	11p15.3		aromatic compound metabolic process|cytoplasm|cytoskeleton|metabolic process|metal ion binding|monooxygenase activity|oxidation reduction|oxidoreductase activity|zinc ion binding|	CH|LIM|Pyr_redox_2	metal ion binding, oxidoreductase activity, zinc ion binding	electron transport, metabolism	cytoskeleton
O94885	1	SASH1	SAM and SH3 domain containing 1	23328	NM_015278	Hs.193133	6q24.3		cell cycle|negative regulation of cell cycle|	SAM_2|SH3_2		cell cycle, negative regulation of progression through cell cycle
O95153	1	BZRAP1	Benzodiazapine receptor (peripheral) associated protein 1	9256	NM_004758	Hs.112499	17q22-q23		benzodiazepine receptor binding|biological_process|cytoplasm|mitochondrion|	SH3_2|fn3	benzodiazepine receptor binding	biological process unknown	mitochondrion
O95155	1	UBE4B	Ubiquitination factor E4B (UFD2 homolog, yeast)	10277	NM_001105562 NM_006048	Hs.632370	1p36.3		apoptosis|cytoplasm|enzyme binding|protein ubiquitination during ubiquitin-dependent protein catabolic process|response to UV|ubiquitin ligase complex|ubiquitin-protein ligase activity|	U-box	enzyme binding, ubiquitin conjugating enzyme activity, ubiquitin-protein ligase activity, unfolded protein binding	apoptosis, protein folding, response to UV	cytoplasm, ubiquitin ligase complex
O95332	1	-	Small trans-membrane and glycosylated protein	57228	NM_001031628 NM_020467 NM_001033873	Hs.652389	12q13.13		cytoplasm|cytoplasmic vesicle|integral to membrane|plasma membrane|
O95352	1	ATG7	ATG7 autophagy related 7 homolog (S. cerevisiae)	10533	NM_006395	Hs.38032	3p25.3-p25.2	Regulation of autophagy	autophagy|catalytic activity|cytoplasm|membrane fusion|metabolic process|positive regulation of protein modification process|protein amino acid lipidation|protein binding|protein transport|ubiquitin activating enzyme activity|ubiquitin cycle|	ThiF	catalytic activity, ubiquitin activating enzyme activity	autophagy, membrane fusion, positive regulation of protein modification, protein amino acid lipidation, protein transport, ubiquitin cycle	cytoplasm
O95365	1	ZBTB7A	Zinc finger and BTB domain containing 7A	51341	NM_015898	Hs.591384	19p13.3	B Cell Survival Pathway	###############################################################################################################################################################################################################################################################	BTB|zf-C2H2	DNA binding, histone acetyltransferase binding, metal ion binding, protein binding, transcriptional repressor activity, zinc ion binding	cartilage development, negative regulation of transcription, DNA-dependent, transcription	nucleus
O95396	1	MOCS3	Molybdenum cofactor synthesis 3	27304	NM_014484	Hs.159410	20q13.13		Mo-molybdopterin cofactor biosynthetic process|ligase activity|metabolic process|protein binding|	MoeZ_MoeB|Rhodanese|ThiF	ligase activity, protein binding	Mo-molybdopterin cofactor biosynthesis
O95996	1	APC2	Adenomatosis polyposis coli 2	10297	NM_005883	Hs.446376	19p13.3	Colorectal cancer|Regulation of actin cytoskeleton|Wnt signaling pathway	Golgi apparatus|Wnt receptor signaling pathway|beta-catenin binding|catenin complex|cytoplasm|microtubule|microtubule binding|plasma membrane|protein binding|protein complex assembly|signal transduction|	APC_basic|APC_crr|Arm|SAMP	beta-catenin binding, microtubule binding	Wnt receptor signaling pathway, protein complex assembly, regulation of progression through cell cycle, signal transduction	catenin complex
O96028	1	WHSC1	Wolf-Hirschhorn syndrome candidate 1	7468	NM_133334 NM_133330 NM_133331 NM_001042424 NM_133335 NM_007331	Hs.113876	4p16.3		###############################################################################################################################################################################################################################################################	HMG_box|PHD|PWWP|SET	DNA binding, protein binding, zinc ion binding	morphogenesis, regulation of transcription, DNA-dependent
P00387	1	CYB5R3	Cytochrome b5 reductase 3	1727	NM_007326 NM_000398	Hs.700572	22q13.31-qter|22q13.2-q13.31	Aminosugars metabolism	###############################################################################################################################################################################################################################################################	FAD_binding_6|NAD_binding_1	FAD binding, NAD binding, cytochrome-b5 reductase activity, cytochrome-b5 reductase activity, oxidoreductase activity	cholesterol biosynthesis, circulation, electron transport, iron ion transport	endoplasmic reticulum, hemoglobin complex, membrane
P02458	1	COL2A1	Collagen, type II, alpha 1	1280	NM_001844 NM_033150	Hs.408182	12q13.11-q13.2	Cell Communication|ECM-receptor interaction|Focal adhesion	collagen|collagen type I|collagen type II|cytoplasm|extracellular matrix structural constituent|extracellular region|phosphate transport|sensory perception of sound|skeletal development|	COLFI|Collagen|VWC	extracellular matrix structural constituent	phosphate transport, sensory perception of sound, skeletal development	collagen, collagen type I, collagen type II, cytoplasm
P02538	1	KRT6A	Keratin 6A	3853	NM_005554	Hs.700779	12q12-q13	Cell Communication	cell differentiation|cellular_component|cytoskeleton organization and biogenesis|ectoderm development|intermediate filament|positive regulation of cell proliferation|protein binding|structural constituent of cytoskeleton|structural molecule activity|	Filament	protein binding, structural constituent of cytoskeleton	ectoderm development	intermediate filament
P02671	1	FGA	Fibrinogen alpha chain	2243	NM_000508 NM_021871	Hs.351593	4q28	Acute Myocardial Infarction|Complement and coagulation cascades|Extrinsic Prothrombin Activation Pathway|Fibrinolysis Pathway|Intrinsic Prothrombin Activation Pathway	###############################################################################################################################################################################################################################################################	Fibrinogen_C|Pentapeptide_2	protein binding	blood coagulation, blood pressure regulation, positive regulation of cell proliferation	extracellular region, fibrinogen complex, soluble fraction
P02679	1	FGG	Fibrinogen gamma chain	2266	NM_000509 NM_021870	Hs.546255	4q28				calcium ion binding	blood pressure regulation, platelet activation, positive regulation of cell proliferation, protein polymerization, signal transduction	fibrinogen complex, fibrinogen complex
P02751	1	FN1	Fibronectin 1	2335	NM_212482 NM_212475 NM_002026 NM_212478 NM_212476 NM_212474 NM_054034	Hs.203717	2q34	Cell Communication|ECM-receptor interaction|Focal adhesion|Regulation of actin cytoskeleton	###############################################################################################################################################################################################################################################################	VWC|fn1|fn2|fn3	collagen binding, extracellular matrix structural constituent, heparin binding, oxidoreductase activity	acute-phase response, cell adhesion, cell migration, metabolism, response to wounding	ER-Golgi intermediate compartment, extracellular matrix (sensu Metazoa), extracellular region
P04746	1	AMY2A	Amylase, alpha 2A (pancreatic)	279	NM_000699	Hs.654437	1p21	Starch and sucrose metabolism	alpha-amylase activity|calcium ion binding|carbohydrate metabolic process|chloride ion binding|digestion|extracellular region|extracellular space|hydrolase activity, acting on glycosyl bonds|metabolic process|	Alpha-amylase|Alpha-amylase_C	alpha-amylase activity, calcium ion binding, hydrolase activity, acting on glycosyl bonds	carbohydrate metabolism	extracellular space
P04792	1	HSPB1	Heat shock 27kDa protein 1	3315	NM_001540	Hs.520973	7q11.23	Downregulated of MTA-3 in ER-negative Breast Tumors|MAPK signaling pathway|Stress Induction of HSP Regulation|VEGF signaling pathway|p38 MAPK Signaling Pathway	anti-apoptosis|cell motility|cell surface|cytoplasm|cytoskeleton|identical protein binding|nucleus|protein folding|regulation of translational initiation|response to unfolded protein|	HSP20	protein binding	anti-apoptosis, cell motility, protein folding, regulation of translational initiation, response to unfolded protein	cell surface, cytoplasm, cytoskeleton
P05060	1	CHGB	Chromogranin B (secretogranin 1)	1114	NM_001819	Hs.516874	20pter-p12		extracellular region|extracellular space|hormone activity|	Granin	hormone activity		extracellular space
P05141	1	SLC25A5	Solute carrier family 25 (mitochondrial carrier; adenine nucleotide translocator), member 5	292	NM_001152	Hs.644618	Xq24-q26	Calcium signaling pathway	adenine transmembrane transporter activity|binding|integral to plasma membrane|membrane|mitochondrial inner membrane|mitochondrial transport|mitochondrion|transport|transporter activity|	Mito_carr	adenine transporter activity, binding, transporter activity	mitochondrial transport, transport	integral to plasma membrane, membrane, mitochondrial inner membrane, mitochondrion
P05386	1	RPLP1	Ribosomal protein, large, P1	6176	NM_001003 NM_213725	Hs.356502	15q22	Ribosome	RNA binding|cytosolic large ribosomal subunit|intracellular|protein binding|ribosome|structural constituent of ribosome|translation|translational elongation|	Ribosomal_60s	RNA binding, structural constituent of ribosome, structural constituent of ribosome	protein biosynthesis, translational elongation	cytosolic large ribosomal subunit (sensu Eukaryota), intracellular, ribosome
P05387	1	RPLP2	Ribosomal protein, large, P2	6181	NM_001004	Hs.437594	11p15.5-p15.4	Ribosome	RNA binding|cytosolic large ribosomal subunit|intracellular|ribosome|structural constituent of ribosome|translation|translational elongation|	Ribosomal_60s	RNA binding, structural constituent of ribosome	protein biosynthesis, translational elongation	cytosolic large ribosomal subunit (sensu Eukaryota), ribosome
P05408	1	SCG5	Secretogranin V (7B2 protein)	6447	NM_003020	Hs.156540	15q13-q14		###############################################################################################################################################################################################################################################################	Secretogranin_V	GTP binding, enzyme activator activity, enzyme inhibitor activity, unfolded protein binding	intracellular protein transport, neuropeptide signaling pathway, peptide hormone processing, protein folding, regulation of hormone secretion, transport	secretory granule
P06702	1	S100A9	S100 calcium binding protein A9	6280	NM_002965	Hs.112405	1q21		actin cytoskeleton reorganization|calcium ion binding|cell-cell signaling|extracellular space|inflammatory response|leukocyte chemotaxis|protein binding|regulation of integrin biosynthetic process|signal transducer activity|	S_100|efhand	calcium ion binding, signal transducer activity	cell-cell signaling, inflammatory response	extracellular space
P06881	1	CALCA	Calcitonin-related polypeptide alpha	796	NM_001033953 NM_001033952 NM_001741	Hs.37058	11p15.2-p15.1		G-protein signaling, coupled to cAMP nucleotide second messenger|activation of adenylate cyclase activity|activation of phospholipase C activity|activation of protein kinase activity|axon|calcitonin receptor binding|cell soma|cell-cell signaling|cellular calcium ion homeostasis|cytoplasm|cytosolic calcium ion homeostasis|detection of temperature stimulus involved in sensory perception of pain|ele…	Calc_CGRP_IAPP	hormone activity	adenylate cyclase activation, blood pressure regulation, cell-cell signaling, elevation of cytosolic calcium ion concentration, phospholipase C activation, skeletal development	endoplasmic reticulum, extracellular space, soluble fraction
P07355	1	ANXA2	Annexin A2	302	NM_001002857 NM_001002858 NM_004039	Hs.511605	15q21-q22		basement membrane|calcium ion binding|calcium-dependent phospholipid binding|cytoskeletal protein binding|extracellular region|melanosome|phospholipase inhibitor activity|plasma membrane|skeletal development|soluble fraction|	Annexin	calcium ion binding, calcium-dependent phospholipid binding, cytoskeletal protein binding, phospholipase inhibitor activity, phospholipase inhibitor activity	skeletal development	plasma membrane, soluble fraction
P07585	1	DCN	Decorin	1634	NM_001920 NM_133503 NM_133504 NM_133505 NM_133506 NM_133507	Hs.706840	12q21.33	TGF-beta signaling pathway	extracellular region|organ morphogenesis|protein binding|proteinaceous extracellular matrix|	LRRNT|LRR_1		organ morphogenesis	extracellular matrix (sensu Metazoa)
P07942	1	LAMB1	Laminin, beta 1	3912	NM_002291	Hs.650585	7q22	Cell Communication|ECM-receptor interaction|Focal adhesion|Prion Pathway|Prion disease	###############################################################################################################################################################################################################################################################	Laminin_EGF|Laminin_N	extracellular matrix structural constituent, protein binding	cell adhesion, positive regulation of epithelial cell proliferation	basement membrane, laminin-1
P08195	1	SLC3A2	Solute carrier family 3 (activators of dibasic and neutral amino acid transport), member 2	6520	NM_001012661 NM_001012662 NM_002394 NM_001012663 NM_001012664 NM_001013251	Hs.502769	11q13		###############################################################################################################################################################################################################################################################	Alpha-amylase	alpha-amylase activity, calcium:sodium antiporter activity, catalytic activity	amino acid transport, calcium ion transport, carbohydrate metabolism, cell growth	cell surface, integral to membrane, membrane
P09093	1	ELA3A	Elastase 3A, pancreatic	10136	NM_005747	Hs.654349	1p36.12		cholesterol metabolic process|digestion|pancreatic elastase activity|peptidase activity|proteolysis|serine-type endopeptidase activity|	Trypsin	pancreatic elastase activity, peptidase activity, serine-type endopeptidase activity	cholesterol metabolism, digestion, proteolysis, proteolysis
P09417	1	QDPR	Quinoid dihydropteridine reductase	5860	NM_000320	Hs.75438	4p15.31	Folate biosynthesis	###############################################################################################################################################################################################################################################################		6,7-dihydropteridine reductase activity, oxidoreductase activity	L-phenylalanine catabolism, amino acid metabolism, dihydrobiopterin metabolism, metabolism, tetrahydrobiopterin biosynthesis
P10909	1	CLU	Clusterin	1191	NM_203339 NM_001831	Hs.436657	8p21-p12		###############################################################################################################################################################################################################################################################	Clusterin		apoptosis, cell death, complement activation, classical pathway, fertilization (sensu Metazoa), innate immune response, lipid metabolism	extracellular region
P11055	1	MYH3	Myosin, heavy chain 3, skeletal muscle, embryonic	4621	NM_002470	Hs.440895	17p13.1		ATP binding|ATPase activity, coupled|actin binding|actin filament-based movement|calmodulin binding|cytoplasm|microfilament motor activity|muscle development|myosin complex|nucleotide binding|striated muscle contraction|striated muscle thick filament|	ATP_bind_2|DUF1409|DUF298|DUF536|DUF593|DUF881|DivIVA|IQ|KE2|M|Myosin_N|Myosin_head|Myosin_tail_1|Prefoldin|SlyX|ZapA|bZIP_1|bZIP_2|bZIP_Maf	ATP binding, ATPase activity, coupled, actin binding, calmodulin binding, microfilament motor activity, nucleotide binding	actin filament-based movement, muscle development, striated muscle contraction	myosin, striated muscle thick filament
P11142	1	HSPA8	Heat shock 70kDa protein 8	3312	NM_006597 NM_153201	Hs.702021	11q24.1	Antigen processing and presentation|MAPK signaling pathway	ATP binding|ATPase activity, coupled|cell surface|cytoplasm|intracellular|melanosome|nucleotide binding|nucleus|protein binding|protein folding|response to stress|response to unfolded protein|unfolded protein binding|	HSP70	ATP binding, ATPase activity, coupled, nucleotide binding, unfolded protein binding	protein folding, response to unfolded protein	cell surface, nucleus
P11277	1	SPTB	Spectrin, beta, erythrocytic (includes spherocytosis, clinical type I)	6710	NM_001024858 NM_000347	Hs.417303	14q23-q24.2		actin binding|actin filament binding|barbed-end actin filament capping|cytoplasm|cytoskeleton|membrane|membrane fraction|protein binding|protein complex|spectrin|structural constituent of cytoskeleton|	CH|PH|Spectrin	actin binding, structural constituent of cytoskeleton	barbed-end actin filament capping	cytoskeleton, membrane, membrane fraction, spectrin
P12107	1	COL11A1	Collagen, type XI, alpha 1	1301	NM_080629 NM_001854 NM_080630	Hs.523446	1p21	Cell Communication|ECM-receptor interaction|Focal adhesion	###############################################################################################################################################################################################################################################################	COLFI|Collagen|Laminin_G_1|Laminin_G_2	extracellular matrix structural constituent, extracellular matrix structural constituent, protein binding, bridging	cartilage condensation, cell adhesion, cell-cell adhesion, extracellular matrix organization and biogenesis, phosphate transport, sensory perception of sound, visual perception	collagen, collagen type XI, cytoplasm
P13645	1	KRT10	Keratin 10 (epidermolytic hyperkeratosis; keratosis palmaris et plantaris)	3858	NM_000421	Hs.99936	17q21	Cell Communication	epidermis development|intermediate filament|protein binding|structural constituent of epidermis|structural molecule activity|	Filament	structural constituent of epidermis, structural molecule activity, structural molecule activity	biological process unknown, epidermis development	intermediate filament, intermediate filament, intermediate filament
P13682	1	ZNF35	Zinc finger protein 35	7584	NM_003420	Hs.288658	3p22-p21		intracellular|metal ion binding|nucleus|regulation of transcription, DNA-dependent|transcription|transcription factor activity|zinc ion binding|	zf-C2H2	metal ion binding, transcription factor activity, zinc ion binding	regulation of transcription, DNA-dependent, transcription	nucleus
P13796	1	LCP1	Lymphocyte cytosolic protein 1 (L-plastin)	3936	NM_002298	Hs.381099	13q14.3		actin binding|actin filament|actin filament binding|actin filament bundle formation|biological_process|calcium ion binding|cytoplasm|cytosol|identical protein binding|phagocytic cup|ruffle|	CH|efhand	actin binding, actin binding, calcium ion binding, calcium ion binding, protein binding	biological process unknown	cytosol
P14316	1	IRF2	Interferon regulatory factor 2	3660	NM_002199	Hs.654566	4q34.1-q35.1		RNA polymerase II transcription factor activity|cell proliferation|immune response|negative regulation of transcription from RNA polymerase II promoter|nucleus|regulation of transcription, DNA-dependent|transcription|transcription factor activity|	IRF	RNA polymerase II transcription factor activity, transcription factor activity	cell proliferation, immune response, regulation of transcription, DNA-dependent, transcription	nucleus
P14543	1	NID1	Nidogen 1	4811	NM_002508	Hs.356624	1q43		basement membrane|bioluminescence|calcium ion binding|cell adhesion|cell-matrix adhesion|extracellular matrix structural constituent|extracellular region|membrane|protein binding|protein-chromophore linkage|	EGF|EGF_CA|G2F|Ldl_recept_b|NIDO|Thyroglobulin_1	calcium ion binding, extracellular matrix structural constituent, protein binding	cell adhesion, cell-matrix adhesion	basement membrane, membrane
P16403	1	HIST1H1C	Histone cluster 1, H1c	3006	NM_005319	Hs.7644	6p21.3		DNA binding|chromosome|nucleosome|nucleosome assembly|nucleosome positioning|nucleus|protein binding|	Linker_histone	DNA binding	nucleosome assembly	chromosome, nucleosome, nucleus
P17980	1	PSMC3	Proteasome (prosome, macropain) 26S subunit, ATPase, 3	5702	NM_002804	Hs.250758	11p12-p13	Proteasome	ATP binding|cytoplasm|cytosol|hydrolase activity|nucleoside-triphosphatase activity|nucleotide binding|nucleus|proteasome complex|protein binding|protein catabolic process|transcription coactivator activity|transcription corepressor activity|	AAA	ATP binding, hydrolase activity, nucleoside-triphosphatase activity, nucleotide binding, transcription coactivator activity, transcription corepressor activity	protein catabolism	cytosol, nucleus, proteasome complex (sensu Eukaryota)
P20648	1	ATP4A	ATPase, H+/K+ exchanging, alpha polypeptide	495	NM_000704	Hs.36992	19q13.1	Oxidative phosphorylation	###############################################################################################################################################################################################################################################################	Cation_ATPase_C|Cation_ATPase_N|E1-E2_ATPase|Hydrolase|Hydrolase_3	ATP binding, hydrogen:potassium-exchanging ATPase activity, hydrolase activity, magnesium ion binding, nucleotide binding, potassium ion binding	metabolism, potassium ion transport, proton transport	integral to plasma membrane, membrane
P21291	1	CSRP1	Cysteine and glycine-rich protein 1	1465	NM_004078	Hs.108080	1q32		metal ion binding|nucleus|protein binding|zinc ion binding|	LIM	metal ion binding, zinc ion binding, zinc ion binding		nucleus
P22234	1	PAICS	Phosphoribosylaminoimidazole carboxylase, phosphoribosylaminoimidazole succinocarboxamide synthetase	10606	BX538303	Hs.709570	4q12	Purine metabolism	###############################################################################################################################################################################################################################################################		identical protein binding, ligase activity, lyase activity, phosphoribosylaminoimidazole carboxylase activity	'de novo' IMP biosynthesis, purine base biosynthesis, purine nucleotide biosynthesis	phosphoribosylaminoimidazole carboxylase complex
P25105	1	PTAFR	Platelet-activating factor receptor	5724	NM_000952	Hs.709174	1p35-p34.3	Calcium signaling pathway|Neuroactive ligand-receptor interaction	###############################################################################################################################################################################################################################################################	7tm_1	phospholipid binding, platelet activating factor receptor activity, receptor activity	G-protein coupled receptor protein signaling pathway, antimicrobial humoral response (sensu Vertebrata), chemotaxis, inflammatory response, phosphoinositide-mediated signaling, response to stimulus, signal transduction	integral to plasma membrane, membrane
P25940	1	COL5A3	Collagen, type V, alpha 3	50509	NM_015719	Hs.235368	19p13.2	Cell Communication|ECM-receptor interaction|Focal adhesion	cell adhesion|cell-matrix adhesion|collagen|collagen type V|cytoplasm|extracellular matrix structural constituent|extracellular region|heparin binding|muscle development|organ morphogenesis|phosphate transport|	COLFI|Collagen|Laminin_G_2	extracellular matrix structural constituent	cell adhesion, muscle development, organ morphogenesis, phosphate transport	collagen, collagen type V, cytoplasm
P26374	1	CHML	Choroideremia-like (Rab escort protein 2)	1122	NM_001821	Hs.654545	1q42-qter		GTPase activator activity|Rab-protein geranylgeranyltransferase activity|Rab-protein geranylgeranyltransferase complex|intracellular protein transport|regulation of GTPase activity|visual perception|	GDI	GTPase activator activity, Rab escort protein activity, Rab-protein geranylgeranyltransferase activity	intracellular protein transport, regulation of GTPase activity, visual perception	Rab-protein geranylgeranyltransferase complex
P27348	1	YWHAQ	Tyrosine 3-monooxygenase/tryptophan 5-monooxygenase activation protein, theta polypeptide	10971	NM_006826	Hs.74405	2p25.1	Cell Cycle: G2/M Checkpoint|Cell cycle	cytoplasm|exocytosis|negative regulation of transcription, DNA-dependent|protein domain specific binding|protein kinase C inhibitor activity|	14-3-3	protein domain specific binding, protein kinase C inhibitor activity	exocytosis, regulation of progression through cell cycle
P27695	1	APEX1	APEX nuclease (multifunctional DNA repair enzyme) 1	328	NM_001641 NM_080649 NM_080648	Hs.73722	14q11.2-q12	Granzyme A mediated Apoptosis Pathway	###############################################################################################################################################################################################################################################################	Exo_endo_phos	3'-5' exonuclease activity, DNA binding, DNA-(apurinic or apyrimidinic site) lyase activity, endodeoxyribonuclease activity, lyase activity, magnesium ion binding, oxidoreductase activity, phosphodiesterase I activity, protein binding, ribonuclease H acti	base-excision repair, regulation of DNA binding, transcription from RNA polymerase II promoter	endoplasmic reticulum, nucleus, perinuclear region, ribosome
P31946	1	YWHAB	Tyrosine 3-monooxygenase/tryptophan 5-monooxygenase activation protein, beta polypeptide	7529	NM_003404 NM_139323	Hs.709214	20q13.1	Cell cycle	cytoplasm|melanosome|monooxygenase activity|perinuclear region of cytoplasm|protein domain specific binding|protein targeting|	14-3-3	monooxygenase activity, protein domain specific binding		perinuclear region
P31949	1	S100A11	S100 calcium binding protein A11	6282	NM_005620	Hs.417004	1q21		S100 beta binding|calcium ion binding|calcium-dependent protein binding|cytoplasm|negative regulation of DNA replication|negative regulation of cell proliferation|nucleus|protein homodimerization activity|ruffle|signal transduction|	S_100|efhand	calcium ion binding	negative regulation of DNA replication, negative regulation of cell proliferation, signal transduction	cytoplasm, nucleus
P32019	1	INPP5B	Inositol polyphosphate-5-phosphatase, 75kDa	3633	NM_005540	Hs.449942	1p34	Inositol phosphate metabolism|Phosphatidylinositol signaling system	biological_process|hydrolase activity|inositol-polyphosphate 5-phosphatase activity|integral to membrane|intracellular|phosphoinositide 5-phosphatase activity|signal transduction|	Exo_endo_phos	hydrolase activity, inositol-polyphosphate 5-phosphatase activity, phosphoinositide 5-phosphatase activity	biological process unknown	integral to membrane
P33402	1	GUCY1A2	Guanylate cyclase 1, soluble, alpha 2	2977	NM_000855	Hs.654555	11q21-q22	Gap junction|Long-term depression|Purine metabolism	cGMP biosynthetic process|cytoplasm|guanylate cyclase activity|guanylate cyclase complex, soluble|heme binding|intracellular signaling cascade|	Guanylate_cyc|HNOB|HNOBA	guanylate cyclase activity	cGMP biosynthesis, intracellular signaling cascade	cytoplasm, guanylate cyclase complex, soluble
P35052	1	GPC1	Glypican 1	2817	NM_002081	Hs.328232	2q35-q37		anchored to membrane|extracellular region|extracellular space|integral to plasma membrane|membrane|plasma membrane|proteinaceous extracellular matrix|	Glypican			extracellular matrix (sensu Metazoa), extracellular space, integral to plasma membrane, membrane
P35240	1	NF2	Neurofibromin 2 (merlin)	4771	NM_181832 NM_016418 NM_000268 NM_181829 NM_181828 NM_181830 NM_181833 NM_181825 NM_181831	Hs.187898	22q12.2		###############################################################################################################################################################################################################################################################	Band_41|ERM	binding, cytoskeletal protein binding, molecular function unknown, structural molecule activity	cell cycle, negative regulation of cell proliferation, negative regulation of progression through cell cycle, sensory perception of sound	cytoplasm, cytoskeleton, cytoskeleton, nucleus, plasma membrane
P35268	1	RPL22	Ribosomal protein L22	6146	AL832147	Hs.554762	1p36.3-p36.2	Ribosome	RNA binding|cytosolic large ribosomal subunit|heparin binding|intracellular|ribosome|structural constituent of ribosome|translation|		RNA binding, heparin binding, structural constituent of ribosome	protein biosynthesis	cytosolic large ribosomal subunit (sensu Eukaryota), ribosome
P35913	1	PDE6B	Phosphodiesterase 6B, cGMP-specific, rod, beta (congenital stationary night blindness 3, autosomal dominant)	5158	NM_000283	Hs.654544	4p16.3	Visual Signal Transduction	3',5'-cyclic-GMP phosphodiesterase activity|detection of light stimulus|hydrolase activity|membrane|phototransduction, visible light|response to stimulus|sensory perception|signal transduction|visual perception|	GAF|PDEase_I	3',5'-cyclic-GMP phosphodiesterase activity, hydrolase activity	phototransduction, visible light, response to stimulus, signal transduction, visual perception	membrane
P37802	1	TAGLN2	Transgelin 2	8407	NM_003564	Hs.517168	1q21-q25		muscle development|protein binding|	CH|Calponin		muscle development	nuclear membrane, plasma membrane
P41238	1	APOBEC1	Apolipoprotein B mRNA editing enzyme, catalytic polypeptide 1	339	NM_001644	Hs.560	12p13.1	Atrazine degradation	RNA binding|cytidine deaminase activity|cytidine to uridine editing|hydrolase activity|lipid metabolic process|lipoprotein metabolic process|mRNA modification|mRNA processing|metal ion binding|protein binding|zinc ion binding|	APOBEC_C|APOBEC_N	RNA binding, cytidine deaminase activity, hydrolase activity, metal ion binding, zinc ion binding	lipid metabolism, mRNA editing, mRNA processing
P41595	1	HTR2B	5-hydroxytryptamine (serotonin) receptor 2B	3357	NM_000867	Hs.421649	2q36.3-q37.1	Calcium signaling pathway|Gap junction|Neuroactive ligand-receptor interaction	###############################################################################################################################################################################################################################################################	7tm_1	receptor activity, rhodopsin-like receptor activity, serotonin receptor activity	circulation, signal transduction	integral to plasma membrane, membrane
P42658	1	DPP6	Dipeptidyl-peptidase 6	1804	BC035912	Hs.703229	7q36.2		catalytic activity|dipeptidyl-peptidase IV activity|integral to membrane|membrane|proteolysis|		catalytic activity, dipeptidyl-peptidase IV activity	proteolysis	integral to membrane, membrane
P42858	1	HTT	Huntingtin	3064	NM_002111	Hs.518450	4p16.3	Huntington's disease|Inhibition of Huntington's disease neurodegeneration by histone deacetylase inhibitors|Neurodegenerative Disorders	Golgi apparatus|apoptosis|behavior|calcium channel regulator activity|cytoplasm|induction of apoptosis|microtubule binding|nucleus|organ morphogenesis|pathogenesis|protein binding|soluble fraction|transcription corepressor activity|transporter activity|	HEAT
P46821	1	MAP1B	Microtubule-associated protein 1B	4131	NM_005909	Hs.637017	5q13		actin binding|cytosol|dendrite development|microtubule|microtubule associated complex|microtubule bundle formation|negative regulation of microtubule depolymerization|protein binding|structural molecule activity|	MAP1B_neuraxin	protein binding, structural molecule activity		microtubule, microtubule associated complex
P46940	1	IQGAP1	IQ motif containing GTPase activating protein 1	8826	NM_003870	Hs.430551	15q26.1	Adherens junction|Regulation of actin cytoskeleton	###############################################################################################################################################################################################################################################################	CH|IQ|RasGAP|RasGAP_C|WW	GTPase inhibitor activity, Ras GTPase activator activity, calmodulin binding	signal transduction, small GTPase mediated signal transduction	actin filament, membrane
P48552	1	NRIP1	Nuclear receptor interacting protein 1	8204	NM_003489	Hs.155017	21q11.2	CARM1 and Regulation of the Estrogen Receptor|Mechanism of Gene Regulation by Peroxisome Proliferators via PPARa(alpha)	###############################################################################################################################################################################################################################################################		androgen receptor binding, estrogen receptor binding, glucocorticoid receptor binding, nuclear hormone receptor binding, protein binding, transcription coactivator activity, transcription coactivator activity, transcription corepressor activity	androgen receptor signaling pathway, transcription	nucleus
P48745	1	NOV	Nephroblastoma overexpressed gene	4856	NM_002514	Hs.235935	8q24.1		extracellular region|growth factor activity|insulin-like growth factor binding|regulation of cell growth|	Cys_knot|IGFBP|TSP_1|VWC	growth factor activity, insulin-like growth factor binding	regulation of cell growth	extracellular region
P49411	1	TUFM	Tu translation elongation factor, mitochondrial	7284	NM_003321	Hs.12084	16p11.2		GTP binding|GTPase activity|intracellular|mitochondrion|nucleotide binding|protein binding|translation|translation elongation factor activity|translational elongation|	GTP_EFTU|GTP_EFTU_D2|GTP_EFTU_D3	GTP binding, nucleotide binding, translation elongation factor activity	protein biosynthesis, translational elongation	intracellular, mitochondrion
P49755	1	TMED10P	Transmembrane emp24-like trafficking protein 10 (yeast) pseudogene	286102	AJ004914	Hs.684601	8q24.3		ER to Golgi vesicle-mediated transport|Golgi stack|integral to plasma membrane|intracellular protein transport|membrane fraction|microsome|plasma membrane|vesicle targeting|zymogen granule membrane|
P50479	1	PDLIM4	PDZ and LIM domain 4	8572	NM_003687	Hs.424312	5q31.1		metal ion binding|protein binding|zinc ion binding|	LIM|PDZ	metal ion binding, protein binding, zinc ion binding
P51157	1	RAB28	RAB28, member RAS oncogene family	9364	NM_001017979 NM_004249	Hs.656060	4p15.33		GTP binding|GTPase activity|intracellular protein transport|nucleotide binding|plasma membrane|small GTPase mediated signal transduction|	Miro|Ras	GTP binding, GTPase activity, nucleotide binding	small GTPase mediated signal transduction	membrane
P51816	1	AFF2	AF4/FMR2 family, member 2	2334	NM_002025	Hs.496911	Xq28		brain development|learning and/or memory|	AF-4		brain development, learning and/or memory
P51911	1	CNN1	Calponin 1, basic, smooth muscle	1264	NM_001299	Hs.465929	19p13.2-p13.1		actin binding|actomyosin structure organization and biogenesis|calmodulin binding|regulation of smooth muscle contraction|	CH|Calponin	actin binding, calmodulin binding	actomyosin structure organization and biogenesis, regulation of smooth muscle contraction
P52198	1	RND2	Rho family GTPase 2	8153	NM_005440	Hs.603111	17q21		GTP binding|GTPase activity|intracellular|nucleotide binding|plasma membrane|protein binding|protein transport|signal transduction|small GTPase mediated signal transduction|	Ras	GTP binding, GTPase activity, nucleotide binding	signal transduction, small GTPase mediated signal transduction	intracellular, membrane
P52799	1	EFNB2	Ephrin-B2	1948	NM_004093	Hs.149239	13q33	Axon guidance	anatomical structure morphogenesis|cell differentiation|cell-cell signaling|ephrin receptor binding|integral to plasma membrane|multicellular organismal development|nervous system development|plasma membrane|	Ephrin	ephrin receptor binding	cell differentiation, cell-cell signaling, morphogenesis, nervous system development	integral to plasma membrane, membrane, plasma membrane
P54577	1	YARS	Tyrosyl-tRNA synthetase	8565	NM_003680	Hs.706890	1p35.1	Aminoacyl-tRNA biosynthesis|Phenylalanine, tyrosine and tryptophan biosynthesis	###############################################################################################################################################################################################################################################################	tRNA-synt_1b|tRNA_bind	ATP binding, interleukin-8 receptor binding, ligase activity, nucleotide binding, signal transducer activity, tRNA binding, tyrosine-tRNA ligase activity	apoptosis, cell motility, protein biosynthesis, tyrosyl-tRNA aminoacylation	cytoplasm, extracellular space, soluble fraction
P54762	1	EPHB1	EPH receptor B1	2047	NM_004441	Hs.116092	3q21-q23	Axon guidance|Eph Kinases and ephrins support platelet aggregation	###############################################################################################################################################################################################################################################################	Ephrin_lbd|Pkinase_Tyr|SAM_1|fn3	ATP binding, ephrin receptor activity, nucleotide binding, protein binding, receptor activity, transferase activity	nervous system development, protein amino acid phosphorylation, signal transduction	integral to plasma membrane, plasma membrane
P55011	1	SLC12A2	Transcribed locus	6558	N75489	Hs.643978	Unknown		###############################################################################################################################################################################################################################################################		amino acid-polyamine transporter activity, potassium ion binding, sodium ion binding, sodium:potassium:chloride symporter activity, symporter activity, transporter activity	amino acid transport, chloride transport, ion transport, potassium ion transport, sodium ion transport	integral to plasma membrane, membrane, membrane fraction
P55884	1	EIF3B	Eukaryotic translation initiation factor 3, subunit B	8662	NM_001037283 NM_003751	Hs.371001	7p22.2		RNA binding|eukaryotic translation initiation factor 3 complex|nucleotide binding|protein binding|translation initiation factor activity|translational initiation|	RRM_1|eIF2A
P60174	1	TPI1	Triosephosphate isomerase 1	7167	NM_000365	Hs.524219	12p13	Carbon fixation|Fructose and mannose metabolism|Glycolysis / Gluconeogenesis|Glycolysis Pathway|Inositol metabolism	fatty acid biosynthetic process|gluconeogenesis|glyceraldehyde-3-phosphate metabolic process|glycolysis|isomerase activity|metabolic process|pentose-phosphate shunt|triose-phosphate isomerase activity|	TIM	isomerase activity, triose-phosphate isomerase activity, triose-phosphate isomerase activity	fatty acid biosynthesis, gluconeogenesis, glycolysis, metabolism, pentose-phosphate shunt
P60866	1	RPS20	Ribosomal protein S20	6224	NM_001023	Hs.8102	8q12	Ribosome	RNA binding|cytosolic small ribosomal subunit|intracellular|protein binding|ribonucleoprotein complex|ribosome|small ribosomal subunit|structural constituent of ribosome|translation|	Ribosomal_S10	protein binding, structural constituent of ribosome	protein biosynthesis	small ribosomal subunit
P61604	1	HSPE1	Heat shock 10kDa protein 1 (chaperonin 10)	3336	NM_002157	Hs.1197	2q33.1		ATP binding|caspase activation|chaperone binding|mitochondrial matrix|mitochondrion|protein folding|response to unfolded protein|unfolded protein binding|	Cpn10	ATP binding, chaperone binding, unfolded protein binding	caspase activation, protein folding, response to unfolded protein	mitochondrion
P61964	1	WDR5	WD repeat domain 5	11091	NM_017588 NM_052821	Hs.397638	9q34		G-protein coupled receptor protein signaling pathway|heterotrimeric G-protein complex|intracellular|nucleus|protein binding|signal transducer activity|skeletal development|	WD40	protein binding
P62877	1	RBX1	Ring-box 1	9978	NM_014248	Hs.474949	22q13.2	Cell cycle|ER–associated degradation (ERAD) Pathway|Regulation of p27 Phosphorylation during Cell Cycle Progression|TGF-beta signaling pathway|Ubiquitin mediated proteolysis|Wnt signaling pathway	DNA repair|SCF ubiquitin ligase complex|cytoplasm|metal ion binding|nucleus|protein binding|protein catabolic process|protein ubiquitination|ubiquitin cycle|ubiquitin ligase complex|ubiquitin-protein ligase activity|zinc ion binding|	zf-C3HC4	metal ion binding, protein binding, zinc ion binding	ubiquitin cycle	nucleus
P62917	1	RPL8	Ribosomal protein L8	6132	NM_033301 NM_000973	Hs.178551	8q24.3	Ribosome	RNA binding|cytoplasm|cytosolic large ribosomal subunit|intracellular|nucleic acid binding|rRNA binding|ribonucleoprotein complex|ribosome|structural constituent of ribosome|translation|	Ribosomal_L2|Ribosomal_L2_C	rRNA binding, structural constituent of ribosome	protein biosynthesis	ribosome
P63104	1	YWHAZ	Tyrosine 3-monooxygenase/tryptophan 5-monooxygenase activation protein, zeta polypeptide	7534	NM_145690 NM_003406	Hs.492407	8q23.1	Cell cycle	anti-apoptosis|cytoplasm|melanosome|protein domain specific binding|signal transduction|transcription factor binding|	14-3-3	protein domain specific binding
P67936	1	TPM4	Tropomyosin 4	7171	NM_003290	Hs.631618	19p13.1		actin binding|cell motility|cortical cytoskeleton|cytoplasm|cytoskeleton|filamentous actin|muscle development|muscle thin filament tropomyosin|podosome|structural constituent of muscle|	Tropomyosin	actin binding		cytoskeleton
P68431	1	HIST1H3H	Histone cluster 1, H3h	8357	NM_003536	Hs.591778	6p22-p21.3		DNA binding|chromosome|nucleosome|nucleosome assembly|nucleus|protein binding|	Histone
P98164	1	LRP2	Low density lipoprotein-related protein 2	4036	NM_004525	Hs.657729	2q24-q31	Hedgehog signaling pathway	###############################################################################################################################################################################################################################################################	EGF|EGF_2|EGF_CA|Ldl_recept_a|Ldl_recept_b	calcium ion binding, protein binding, receptor activity	lipid metabolism, protein amino acid glycosylation, receptor mediated endocytosis	coated pit, integral to membrane, lysosome, membrane
Q00597	1	FANCC	Fanconi anemia, complementation group C	2176	BC006303	Hs.656658	9q22.3	BRCA1-dependent Ub-ligase activity|Role of BRCA1, BRCA2 and ATR in Cancer Susceptibility	DNA repair|cytoplasm|cytosol|nucleus|protein binding|protein complex assembly|		protein binding	DNA repair, DNA repair, protein complex assembly	cytosol, nucleus
Q01082	1	SPTBN1	Spectrin, beta, non-erythrocytic 1	6711	AL542459	Hs.705692	2p21	Synaptic Proteins at the Synaptic Junction	actin binding|barbed-end actin filament capping|calmodulin binding|cytoplasm|cytoskeleton|membrane|nucleolus|plasma membrane|spectrin|structural constituent of cytoskeleton|		actin binding, actin binding, calmodulin binding, structural constituent of cytoskeleton	barbed-end actin filament capping	cytoskeleton, membrane, spectrin
Q01484	1	ANK2	Ankyrin 2, neuronal	287	NM_001148 NM_020977	Hs.620557	4q25-q27		actin cytoskeleton|cytoplasm|membrane|protein binding|signal transduction|structural constituent of cytoskeleton|	Ank|Death|Shigella_OspC|ZU5	oxidoreductase activity, protein binding, structural constituent of cytoskeleton	metabolism, signal transduction	actin cytoskeleton, membrane
Q01668	1	CACNA1D	Calcium channel, voltage-dependent, L type, alpha 1D subunit	776	NM_000720	Hs.476358	3p14.3	Calcium signaling pathway|GnRH signaling pathway|MAPK signaling pathway|Type II diabetes mellitus	###############################################################################################################################################################################################################################################################	Ion_trans|PKD_channel	calcium ion binding, dihydropyridine-sensitive calcium channel activity	calcium ion transport, cation transport	integral to membrane, membrane, voltage-gated calcium channel complex
Q01780	1	EXOSC10	Exosome component 10	5394	NM_001001998 NM_002685	Hs.632368	1p36.22		###############################################################################################################################################################################################################################################################	3_5_exonuc|HRDC|PMC2NT	3'-5' exonuclease activity, RNA binding, hydrolase activity, identical protein binding, protein serine/threonine kinase activity	mRNA catabolism, nonsense-mediated decay, rRNA processing	nucleolus, nucleus
Q01995	1	TAGLN	Transcribed locus	6876	BM544679	Hs.666842	Unknown		actin binding|cytoplasm|muscle development|protein binding|		actin binding	muscle development, muscle development
Q05BV3	1	EML5	Echinoderm microtubule associated protein like 5	161436	NM_183387	Hs.705458	14q31.3		cytoplasm|microtubule|	HELP|Reg_prop|WD40
Q06418	1	TYRO3	TYRO3 protein tyrosine kinase	7301	NM_006293	Hs.381282	15q15.1-q21.1		###############################################################################################################################################################################################################################################################	Pkinase_Tyr|fn3|ig	ATP binding, nucleotide binding, protein binding, receptor activity, receptor signaling protein tyrosine kinase activity, transferase activity	cell adhesion, protein amino acid phosphorylation, signal transduction	integral to plasma membrane, membrane
Q06830	1	PRDX1	Peroxiredoxin-1	5052	NM_002574 NM_181696 NM_181697	Hs.180909	1p34.1				oxidoreductase activity, peroxidase activity	cell proliferation, skeletal development
Q07020	1	RPL18	Ribosomal protein L18	6141	NM_000979	Hs.515517	19q13	Ribosome	RNA binding|cytoplasm|cytosolic large ribosomal subunit|intracellular|ribosome|structural constituent of ribosome|translation|	Ribosomal_L18e	RNA binding, structural constituent of ribosome	protein biosynthesis	cytosolic large ribosomal subunit (sensu Eukaryota), ribosome
Q08211	1	DHX9	DEAH (Asp-Glu-Ala-His) box polypeptide 9	1660	NM_001357	Hs.191518	1q25		ATP binding|ATP-dependent DNA helicase activity|ATP-dependent RNA helicase activity|ATP-dependent helicase activity|DNA binding|cytoplasm|double-stranded RNA binding|hydrolase activity|intracellular|nucleolus|nucleotide binding|nucleus|protein binding|	DEAD|DUF1605|HA2|Helicase_C|dsrm	ATP binding, ATP-dependent DNA helicase activity, ATP-dependent RNA helicase activity, ATP-dependent helicase activity, DNA binding, double-stranded RNA binding, hydrolase activity, nucleotide binding, protein binding		cytoplasm, nucleus
Q08AL3	1	FBXO10	F-box protein 10	26267	NM_012166	Hs.709527	9p13.2		cytoplasm|protein binding|protein ubiquitination|ruffle|ubiquitin ligase complex|ubiquitin-protein ligase activity|		pectinesterase activity, ubiquitin-protein ligase activity	cell wall modification, protein ubiquitination	cell wall, ubiquitin ligase complex
Q0IIM8	1	TBC1D8B	TBC1 domain family, member 8B (with GRAM domain)	54885	NM_017752 NM_198881	Hs.351798	Xq22.3		Rab GTPase activator activity|calcium ion binding|intracellular|regulation of Rab GTPase activity|	GRAM|TBC
Q12809	1	KCNH2	Potassium voltage-gated channel, subfamily H (eag-related), member 2	3757	NM_000238 NM_172057 NM_172056	Hs.647099	7q35-q36		###############################################################################################################################################################################################################################################################	Ion_trans|Ion_trans_2|PAS|cNMP_binding	delayed rectifier potassium channel activity, potassium ion binding, two-component sensor activity	cation transport, muscle contraction, potassium ion transport, regulation of heart contraction, regulation of transcription, DNA-dependent, sensory perception of sound	integral to membrane, membrane, membrane fraction, voltage-gated potassium channel complex
Q12860	1	CNTN1	Contactin 1	1272	NM_001843 NM_175038	Hs.143434	12q11-q12	Cell adhesion molecules (CAMs)	Notch signaling pathway|anchored to membrane|cell adhesion|membrane|membrane fraction|plasma membrane|protein binding|	I-set|V-set|fn3|ig	protein binding	Notch signaling pathway, cell adhesion	membrane, membrane fraction
Q12955	1	ANK3	Ankyrin 3, node of Ranvier (ankyrin G)	288	NM_020987 NM_001149	Hs.499725	10q21	Synaptic Proteins at the Synaptic Junction	Golgi apparatus|cellular_component|cytoplasm|cytoskeletal anchoring|cytoskeleton|endoplasmic reticulum|molecular_function|protein binding|protein targeting|signal transduction|structural constituent of cytoskeleton|	Ank|Death|ZU5	molecular function unknown, protein binding, structural constituent of cytoskeleton	cytoskeletal anchoring, protein targeting, signal transduction	Golgi apparatus, cellular component unknown, cytoskeleton, cytoskeleton, endoplasmic reticulum
Q13151	1	HNRNPA0	Transcribed locus, weakly similar to XP_001695130.1 cell wall protein pherophorin-C10 [Chlamydomonas reinhardtii]	10949	BQ231918	Hs.645902	Unknown		RNA binding|heterogeneous nuclear ribonucleoprotein complex|mRNA processing|nucleotide binding|nucleus|
Q13237	1	PRKG2	Protein kinase, cGMP-dependent, type II	5593	NM_006259	Hs.570833	4q13.1-q21.1	Actions of Nitric Oxide in the Heart|Gap junction|Ion Channels and Their Functional Role in Vascular Endothelium|Long-term depression|Olfactory transduction	ATP binding|cGMP binding|cGMP-dependent protein kinase activity|nucleotide binding|protein amino acid phosphorylation|protein serine/threonine kinase activity|protein tyrosine kinase activity|signal transduction|transferase activity|	Pkinase|cNMP_binding	ATP binding, cGMP binding, cGMP-dependent protein kinase activity, nucleotide binding, protein serine/threonine kinase activity, transferase activity	protein amino acid phosphorylation, regulation of progression through cell cycle, signal transduction
Q13387	1	MAPK8IP2	Mitogen-activated protein kinase 8 interacting protein 2	23542	NM_012324 NM_016431	Hs.558180	22q13.33	MAPK signaling pathway	###############################################################################################################################################################################################################################################################	PID|SH3_1|TAF	MAP-kinase scaffold activity, beta-amyloid binding, kinesin binding, protein kinase binding, structural molecule activity	positive regulation of anti-apoptosis, regulation of JNK cascade, signal complex formation	cytoplasm
Q13395	1	TARBP1	TAR (HIV-1) RNA binding protein 1	6894	NM_005646	Hs.498115	1q42.3		RNA binding|RNA methyltransferase activity|RNA processing|binding|nucleus|regulation of transcription from RNA polymerase II promoter|transferase activity|	SpoU_methylase	RNA binding, RNA methyltransferase activity, binding	RNA processing	nucleus
Q13422	1	IKZF1	Hypothetical protein LOC100132224	10320	NM_006060	Hs.488251	7p13-p11.1		DNA binding|intracellular|mesoderm development|metal ion binding|nucleus|regulation of transcription, DNA-dependent|transcription|zinc ion binding|	zf-C2H2
Q13641	1	TPBG	Trophoblast glycoprotein	7162	NM_006670	Hs.82128	6q14-q15		cell adhesion|cell motility|integral to plasma membrane|membrane|protein binding|	LRRCT|LRRNT|LRR_1		cell adhesion, cell motility	integral to plasma membrane, membrane
Q13813	1	SPTAN1	Spectrin, alpha, non-erythrocytic 1 (alpha-fodrin)	6709	NM_003127	Hs.372331	9q33-q34	FAS signaling pathway ( CD95 )|HIV-I Nef: negative effector of Fas and TNF|Induction of apoptosis through DR3 and DR4/5 Death Receptors |Synaptic Proteins at the Synaptic Junction|TNFR1 Signaling Pathway|Tight junction|uCalpain and friends in Cell spread	actin binding|barbed-end actin filament capping|calcium ion binding|calmodulin binding|cytoplasm|cytoskeleton|membrane|membrane fraction|spectrin|structural constituent of cytoskeleton|	Hemerythrin|Histone_HNS|SH3_1|SH3_2|SH3_3|Spectrin|efhand	actin binding, calcium ion binding, calmodulin binding, structural constituent of cytoskeleton	barbed-end actin filament capping	cytoskeleton, membrane, membrane fraction, spectrin
Q13835	1	PKP1	Plakophilin 1 (ectodermal dysplasia/skin fragility syndrome)	5317	NM_000299 NM_001005337	Hs.497350	1q32		###############################################################################################################################################################################################################################################################	Arm|HEAT	intermediate filament binding, signal transducer activity, structural constituent of epidermis	cell adhesion, cell-cell signaling, signal transduction	cytoskeleton, desmosome, intermediate filament, nucleus, plasma membrane
Q14004	1	CDC2L5	Cell division cycle 2-like 5 (cholinesterase-related cell division controller)	8621	NM_003718 NM_031267	Hs.233552	7p13		###############################################################################################################################################################################################################################################################	Pkinase|Pkinase_Tyr	ATP binding, nucleotide binding, protein serine/threonine kinase activity, transferase activity	development, positive regulation of cell proliferation, protein amino acid phosphorylation, regulation of mitosis
Q14160	1	SCRIB	Scribbled homolog (Drosophila)	23513	NM_182706 NM_015356	Hs.436329	8q24.3		cytoplasm|membrane|protein binding|	DUF192|LRR_1|PDZ	protein binding		membrane
Q14191	1	WRN	Werner syndrome	7486	NM_000553	Hs.632050	8p12-p11.2		###############################################################################################################################################################################################################################################################	3_5_exonuc|DEAD|HRDC|Helicase_C	3'-5' exonuclease activity, ATP binding, ATP-dependent helicase activity, DNA binding, DNA helicase activity, hydrolase activity, nucleotide binding, protein binding	DNA metabolism, aging	nucleus
Q14683	1	SMC1A	Structural maintenance of chromosomes 1A	8243	NM_006306	Hs.211602	Xp11.22-p11.21	Cell cycle	###############################################################################################################################################################################################################################################################	SMC_N|SMC_hinge
Q14697	1	GANAB	Glucosidase, alpha; neutral AB	23193	NM_198335 NM_198334	Hs.595071	11q12.3	ER–associated degradation (ERAD) Pathway|Glycan structures - biosynthesis 1|N-Glycan biosynthesis	Golgi apparatus|Golgi stack|alpha-glucosidase II complex|carbohydrate metabolic process|endoplasmic reticulum|glucan 1,3-alpha-glucosidase activity|hydrolase activity|hydrolase activity, hydrolyzing O-glycosyl compounds|melanosome|protein binding|	Glyco_hydro_31	hydrolase activity, hydrolase activity, hydrolyzing O-glycosyl compounds, protein binding	carbohydrate metabolism	Golgi stack, endoplasmic reticulum
Q14764	1	MVP	Major vault protein	9961	NM_017458 NM_005115	Hs.632177	16p13.1-p11.2		cytoplasm|intracellular protein transport across a membrane|mRNA transport|nuclear pore|nucleus|protein binding|protein transport|response to drug|ribonucleoprotein complex|	Vault		response to drug	cytoplasm, nucleus, ribonucleoprotein complex
Q14781	1	CBX2	Chromobox homolog 2 (Pc class homolog, Drosophila)	84733	NM_005189 NM_032647	Hs.368410	17q25.3		DNA binding|chromatin|chromatin assembly or disassembly|chromatin binding|chromatin modification|negative regulation of transcription|nucleus|regulation of transcription, DNA-dependent|transcription|transcription repressor activity|	Chromo	DNA binding, chromatin binding, transcriptional repressor activity	chromatin assembly or disassembly, chromatin modification, negative regulation of transcription, regulation of transcription, DNA-dependent, transcription	chromatin, nucleus
Q14966	1	ZNF638	Zinc finger protein 638	27332	NM_014497 NM_001014972	Hs.434401	2p13.2-p13.1		DNA binding|RNA binding|RNA splicing|cytoplasm|double-stranded DNA binding|intracellular|metal ion binding|nuclear speck|nucleoplasm|nucleus|zinc ion binding|	RRM_1	DNA binding, RNA binding, double-stranded DNA binding, metal ion binding, nucleotide binding, zinc ion binding	RNA splicing	cytoplasm, nucleoplasm, nucleus
Q14993	1	COL19A1	Collagen, type XIX, alpha 1	1310	NM_001858	Hs.444842	6q12-q13		###############################################################################################################################################################################################################################################################	Collagen	extracellular matrix structural constituent, protein binding, bridging	cell-cell adhesion, extracellular matrix organization and biogenesis, phosphate transport, skeletal development	collagen, cytoplasm
Q14C87	1	TMEM132D	Transmembrane protein 132D	121256	NM_133448	Hs.507268	12q24.32-q24.33		integral to membrane|membrane|
Q15323	1	KRT31	Keratin 31	3881	NM_002277	Hs.41696	17q12-q21	Cell Communication	epidermis development|intermediate filament|protein binding|structural constituent of cytoskeleton|structural molecule activity|	Filament
Q15361	1	TTF1	Transcription termination factor, RNA polymerase I	7270	NM_007344	Hs.54780	9q34.13		###############################################################################################################################################################################################################################################################	Myb_DNA-binding	DNA binding, transcription termination factor activity	regulation of transcription, transcription termination	nucleus, nucleus
Q15545	1	TAF7	TAF7 RNA polymerase II, TATA box binding protein (TBP)-associated factor, 55kDa	6879	NM_005642	Hs.438838	5q31	Basal transcription factors	###############################################################################################################################################################################################################################################################	TAFII55_N	protein binding, transcription coactivator activity, transcription factor activity	regulation of transcription, DNA-dependent	nucleus, transcription factor TFIID complex
Q15643	1	TRIP11	Thyroid hormone receptor interactor 11	9321	NM_004239	Hs.632339	14q31-q32		Golgi apparatus|Golgi stack|membrane|protein binding|transcription coactivator activity|transcription from RNA polymerase II promoter|		protein binding, transcription coactivator activity	transcription from RNA polymerase II promoter	Golgi stack
Q15858	1	SCN9A	Sodium channel, voltage-gated, type IX, alpha subunit	6335	NM_002977	Hs.705382	2q24		calcium ion binding|cation channel activity|cation transport|ion transport|membrane|membrane fraction|sodium ion binding|sodium ion transport|voltage-gated ion channel activity|voltage-gated sodium channel activity|voltage-gated sodium channel complex|	IQ|Ion_trans|Na_trans_assoc|PKD_channel	calcium ion binding, cation channel activity, sodium ion binding, voltage-gated sodium channel activity	cation transport, sodium ion transport	membrane, membrane fraction, voltage-gated sodium channel complex
Q16363	1	LAMA4	Laminin, alpha 4	3910	NM_001105206 NM_001105207 NM_002290 NM_001105209 NM_001105208	Hs.654572	6q21	Cell Communication|ECM-receptor interaction|Focal adhesion	basal lamina|extracellular matrix structural constituent|extracellular region|laminin-1 complex|receptor binding|regulation of cell adhesion|regulation of cell migration|regulation of embryonic development|	Laminin_EGF|Laminin_G_2|Laminin_I|Laminin_II	extracellular matrix structural constituent, receptor binding	regulation of cell adhesion, regulation of cell migration, regulation of embryonic development	basal lamina, laminin-1
Q16585	1	SGCB	Sarcoglycan, beta (43kDa dystrophin-associated glycoprotein)	6443	NM_000232	Hs.438953	4q12	Ion Channels and Their Functional Role in Vascular Endothelium	cytoplasm|cytoskeleton|cytoskeleton organization and biogenesis|integral to plasma membrane|membrane|muscle development|sarcoglycan complex|	Sarcoglycan_1		cytoskeleton organization and biogenesis, muscle development	cytoskeleton, integral to plasma membrane, membrane, sarcoglycan complex
Q16698	1	DECR1	2,4-dienoyl CoA reductase 1, mitochondrial	1666	NM_001359	Hs.492212	8q21.3		2,4-dienoyl-CoA reductase (NADPH) activity|binding|metabolic process|mitochondrion|oxidoreductase activity|	adh_short	2,4-dienoyl-CoA reductase (NADPH) activity, oxidoreductase activity	metabolism	mitochondrion
Q16825	1	PTPN21	Protein tyrosine phosphatase, non-receptor type 21	11099	NM_007039	Hs.437040	14q31.3		binding|cytoplasm|cytoskeleton|hydrolase activity|protein amino acid dephosphorylation|protein tyrosine phosphatase activity|structural molecule activity|	Band_41|Y_phosphatase	binding, hydrolase activity, protein tyrosine phosphatase activity, structural molecule activity	protein amino acid dephosphorylation	cytoskeleton
Q16853	1	AOC3	Amine oxidase, copper containing 3 (vascular adhesion protein 1)	8639	NM_003734	Hs.198241	17q21	Alkaloid biosynthesis II|Arginine and proline metabolism|Glycine, serine and threonine metabolism|Histidine metabolism|Phenylalanine metabolism|Tryptophan metabolism|Tyrosine metabolism|beta-Alanine metabolism	###############################################################################################################################################################################################################################################################	Cu_amine_oxid|Cu_amine_oxidN2|Cu_amine_oxidN3	amine oxidase activity, copper ion binding, metal ion binding, oxidoreductase activity, protein binding	amine metabolism, cell adhesion, inflammatory response	integral to membrane, plasma membrane
Q2M389	1	KIAA1033	KIAA1033	23325	NM_015275	Hs.12144	12q24.11
Q2VPK5	1	C16orf84	Chromosome 16 open reading frame 84	348180	NM_001012759 NM_001012762	Hs.592074	16q24.3
Q2WGJ9	1	FER1L6	Fer-1-like 6 (C. elegans)	654463	NM_001039112	Hs.632058	Unknown		integral to membrane|membrane|
Q2YD98	1	KIAA1530	KIAA1530	57654	NM_020894	Hs.380475	4p16.3
Q330K5	1	PADI6	Peptidyl arginine deiminase, type VI	353238	NM_207421	Hs.531598	1p36.13		calcium ion binding|cytoplasm|hydrolase activity|nucleus|peptidyl-citrulline biosynthetic process from peptidyl-arginine|protein modification process|protein-arginine deiminase activity|	PAD|PAD_M|PAD_N
Q3SY46	1	KRTAP13-3	Keratin associated protein 13-3	337960	NM_181622	Hs.553687	21q22.1		intermediate filament|	PMG			intermediate filament
Q3ZV40	1	RHD	Rh blood group, CcEe antigens	6007	NM_016124	Hs.647623	1p36.11		biological_process|integral to membrane|integral to plasma membrane|membrane|molecular_function|	Ammonium_transp	molecular function unknown	biological process unknown	integral to membrane, integral to plasma membrane, membrane
Q495Y0	1	CYP3A5	Cytochrome P450, family 3, subfamily A, polypeptide 5 pseudogene 2	1577	NM_000777	Hs.695915	7q21.1	Linoleic acid metabolism|Metabolism of xenobiotics by cytochrome P450|gamma-Hexachlorocyclohexane degradation	###############################################################################################################################################################################################################################################################	p450	heme binding, iron ion binding, metal ion binding, oxygen binding, unspecific monooxygenase activity	electron transport, steroid metabolism, xenobiotic metabolism	endoplasmic reticulum, membrane, membrane fraction, microsome
Q4KMG0	1	CDON	Cdon homolog (mouse)	50937	NM_016952	Hs.38034	11q23-q24		cell adhesion|integral to membrane|membrane|protein binding|	I-set|V-set|fn3|ig	protein binding	cell-cell adhesion, positive regulation of myoblast differentiation	cell surface, membrane
Q4LE58	1	EIF4G1	Eukaryotic translation initiation factor 4 gamma, 1	1981	NM_182917 NM_198241 NM_198244 NM_198242 NM_004953	Hs.433750	3q27-qter	Internal Ribosome entry pathway|Regulation of eIF4e and p70 S6 Kinase|mTOR Signaling Pathway	RNA binding|RNA metabolic process|cytoplasm|eukaryotic translation initiation factor 4F complex|protein binding|regulation of translational initiation|translation initiation factor activity|	MA3|MIF4G|W2	RNA binding, protein binding, translation initiation factor activity, translation initiation factor activity	regulation of translational initiation, regulation of translational initiation	eukaryotic translation initiation factor 4F complex
Q4U2R6	1	MRPL51	Mitochondrial ribosomal protein L51	51258	NM_016497	Hs.55847	12p13.3-p13.1		mitochondrial large ribosomal subunit|mitochondrion|ribosome|structural constituent of ribosome|translation|
Q4VNC0	1	ATP13A5	ATPase type 13A5	344905	NM_198505	Hs.658032	3q29		###############################################################################################################################################################################################################################################################	Cation_ATPase_N|E1-E2_ATPase	ATP binding, ATPase activity	cation transport	integral to membrane, membrane
Q4ZIN3	1	C19orf6	Chromosome 19 open reading frame 6	91304	NM_001033026 NM_033420	Hs.515003	19p13.3		cytoplasm|integral to membrane|membrane|				integral to membrane, membrane
Q53GA4	1	PHLDA2	Pleckstrin homology-like domain, family A, member 2	7262	NM_003311	Hs.154036	11p15.5		apoptosis|cytoplasm|genetic imprinting|organ morphogenesis|	PH
Q59EM7	1	NFKBIB	Nuclear factor of kappa light polypeptide gene enhancer in B-cells inhibitor, beta	4793	NM_001001716 NM_002503	Hs.9731	19q13.1	Adipocytokine signaling pathway|B cell receptor signaling pathway|Hypoxia and p53 in the Cardiovascular system|T cell receptor signaling pathway	cytoplasm|nucleus|protein binding|receptor activity|signal transducer activity|signal transduction|transcription|transcription coactivator activity|	Ank	protein binding, receptor activity, signal transducer activity, transcription coactivator activity	signal transduction, transcription	nucleus
Q5JVX7	1	C1orf141	Chromosome 1 open reading frame 141	400757	NM_001013674	Hs.666621	1p31.3
Q5SRE7	1	PHYHD1	Phytanoyl-CoA dioxygenase domain containing 1	254295	NM_001100876 NM_174933 NM_001100877	Hs.709447	9q34.11		oxidoreductase activity|oxidoreductase activity, acting on single donors with incorporation of molecular oxygen, incorporation of two atoms of oxygen|	PhyH
Q5T011	1	KIAA0467	KIAA0467	23334	NM_015284	Hs.643560	1p34.2
Q5T6X5	1	GPRC6A	G protein-coupled receptor, family C, group 6, member A	222545	NM_148963	Hs.266745	6q22.2		G-protein coupled receptor protein signaling pathway|integral to membrane|membrane|metabotropic glutamate, GABA-B-like receptor activity|plasma membrane|receptor activity|signal transduction|	7tm_3|ANF_receptor|NCD3G	metabotropic glutamate, GABA-B-like receptor activity, receptor activity	G-protein coupled receptor protein signaling pathway, signal transduction	integral to membrane, membrane
Q5TA45	1	CPSF3L	Cleavage and polyadenylation specific factor 3-like	54973	NM_017871	Hs.6449	1p36.33		cytoplasm|hydrolase activity|integrator complex|nucleus|protein binding|snRNA processing|	Lactamase_B|RMMBL
Q5TAP6	1	UTP14C	UTP14, U3 small nucleolar ribonucleoprotein, homolog C (yeast)	440138	NM_021645 NM_001004127	Hs.512963	13q14.2	Glycan structures - biosynthesis 1|N-Glycan biosynthesis	biosynthetic process|integral to membrane|membrane|protein binding|transferase activity|transferase activity, transferring glycosyl groups|	Glycos_transf_1|Utp14		cell differentiation, meiosis, ribosome biogenesis, spermatogenesis	nucleus
Q5TCX8	1	-	Mixed lineage kinase 4	84451	NM_032435	Hs.547779	1q42		###############################################################################################################################################################################################################################################################	Pkinase|Pkinase_Tyr|SH3_1|SH3_2
Q5TG53	1	C1orf133	Chromosome 1 open reading frame 133	574036	BC094794	Hs.446946	1q32.2
Q5TZA2	1	CROCC	Ciliary rootlet coiled-coil, rootletin	9696	NM_014675	Hs.309403	1pter-p36.11		cell cycle|cell projection organization and biogenesis|centriole|centrosome organization and biogenesis|ciliary rootlet|kinesin binding|structural molecule activity|	KE2|M|Pox_A_type_inc|Prefoldin|bZIP_2|bZIP_Maf
Q5VUJ6	1	LRCH2	Leucine-rich repeats and calponin homology (CH) domain containing 2	57631	NM_020871	Hs.65366	Xq23		protein binding|	CH|LRR_1
Q5VV42	1	CDKAL1	CDK5 regulatory subunit associated protein 1-like 1	54901	NM_017774	Hs.657604	6p22.3		4 iron, 4 sulfur cluster binding|catalytic activity|integral to membrane|iron ion binding|membrane|metabolic process|metal ion binding|	Radical_SAM|TRAM|UPF0004	catalytic activity, iron ion binding, molecular function unknown
Q5VZ18	1	SHE	Src homology 2 domain containing E	126669	NM_001010846	Hs.591481	1q21.3		intracellular signaling cascade|protein binding|	SH2		intracellular signaling cascade
Q5VZ89	1	DENND4C	DENN/MADD domain containing 4C	55667	NM_017925	Hs.249591	9p22.1		integral to membrane|membrane|	DENN|PPR|dDENN			integral to membrane, membrane
Q5XKE5	1	KRT79	Keratin 79	338785	NM_175834	Hs.711471	12q13.13		intermediate filament|structural molecule activity|	Filament
Q659A1	1	NARG2	NMDA receptor regulated 2	79664	NM_024611 NM_001018089	Hs.200943	15q22.2		catalytic activity|nucleus|		catalytic activity
Q66K14	1	TBC1D9B	TBC1 domain family, member 9B (with GRAM domain)	23061	NM_198868 NM_015043	Hs.155829	5q35.3		GTPase activator activity|Rab GTPase activator activity|calcium ion binding|integral to membrane|intracellular|membrane|regulation of Rab GTPase activity|	GRAM|TBC|efhand
Q6BDS2	1	UHRF1BP1	UHRF1 (ICBP90) binding protein 1	54887	NM_017754	Hs.700656	6p21
Q6DCA0	1	AMMECR1L	AMME chromosomal region gene 1-like	83607	NM_031445	Hs.546449	2q21			AMMECR1
Q6ISB3	1	GRHL2	Grainyhead-like 2 (Drosophila)	79977	NM_024915	Hs.661088	8q22.3		DNA binding|nucleus|regulation of transcription, DNA-dependent|transcription|	CP2
Q6NSI3	1	FAM53A	Family with sequence similarity 53, member A	152877	NM_001013622	Hs.143314	4p16.3		nucleus|
Q6NV95	1	-	Similar to poly(A) binding protein, cytoplasmic 1	728773	BC068242	Hs.334462	2q22.3		RNA binding|nucleotide binding|
Q6P3S6	1	FBXO42	F-box protein 42	54455	NM_018994	Hs.522384	1p36.23-p36.11		ubiquitin cycle|	F-box|Kelch_1|Kelch_2		ubiquitin cycle
Q6P3X8	1	PGBD2	PiggyBac transposable element derived 2	267002	NM_170725 NM_001017434	Hs.602037	1q44
Q6PID8	1	-	KIAA0265 protein	23008	NM_014997	Hs.520710	7q32.2			Kelch_1|Kelch_2
Q6PIN3	1	MT1X	Metallothionein 1X	4501	NM_005952	Hs.374950	16q13		cadmium ion binding|copper ion binding|iron ion binding|metal ion binding|response to metal ion|zinc ion binding|	Metallothio	cadmium ion binding, copper ion binding, metal ion binding, metal ion binding, zinc ion binding	response to metal ion
Q6PJP8	1	DCLRE1A	DNA cross-link repair 1A (PSO2 homolog, S. cerevisiae)	9937	NM_014881	Hs.1560	10q25.1		DNA repair|cell cycle|cell division|mitosis|nucleotide-excision repair|nucleus|	DRMBL		DNA repair, cell cycle, cell division, mitosis	nucleus
Q6PL18	1	ATAD2	ATPase family, AAA domain containing 2	29028	NM_014109	Hs.370834	8q24.13		ATP binding|nucleoside-triphosphatase activity|nucleotide binding|	AAA|Bromodomain	ATP binding, nucleoside-triphosphatase activity, nucleotide binding
Q6UUV7	1	CRTC3	CREB regulated transcription coactivator 3	64784	NM_022769 NM_001042574	Hs.567572	15q26.1		cytoplasm|nucleus|regulation of transcription, DNA-dependent|transcription|
Q6UWI4	1	SHISA2	Transmembrane protein 46	387914	NM_001007538	Hs.433791	13q12.13		integral to membrane|membrane|
Q6UXJ7	1	LRRTM4	Leucine rich repeat transmembrane neuronal 4	80059	NM_024993	Hs.285782	2p12		integral to membrane|membrane|protein binding|	LRR_1			integral to membrane, membrane
Q6UXR4	1	SERPINA13	Serpin peptidase inhibitor, clade A (alpha-1 antiproteinase, antitrypsin), member 13 (pseudogene)	388007	AY358238	Hs.527795	14q32.13		serine-type endopeptidase inhibitor activity|		serine-type endopeptidase inhibitor activity
Q6UXX5	1	ITIH5L	Inter-alpha (globulin) inhibitor H5-like	347365	NM_198510	Hs.454272	Xp11.21		extracellular region|hyaluronan metabolic process|serine-type endopeptidase inhibitor activity|	ITI_HC_C|VIT|VWA
Q6WKZ4	1	RAB11FIP1	RAB11 family interacting protein 1 (class I)	80223	NM_001002814 NM_001002233 NM_025151	Hs.696035	8p11.22		cytoplasmic vesicle|membrane|protein binding|protein transport|recycling endosome|	C2
Q6Y2L2	1	C9orf156	Chromosome 9 open reading frame 156	51531	NM_016481	Hs.9196	9q22.33		hydrolase activity|	UPF0066	molecular function unknown
Q6ZN62	1	AEBP2	AE binding protein 2	121536	NM_153207 NM_001114176	Hs.126497	12p12.3		DNA binding|intracellular|metal ion binding|nucleic acid binding|nucleus|zinc ion binding|	zf-C2H2	metal ion binding, nucleic acid binding, zinc ion binding		nucleus
Q6ZNH5	1	ZNF497	Zinc finger protein 497	162968	NM_198458	Hs.447840	19q13.43		DNA binding|intracellular|metal ion binding|nucleic acid binding|nucleus|regulation of transcription, DNA-dependent|transcription|zinc ion binding|	DUF1610|TFIIS_C|XPA_N|zf-C2H2	DNA binding, metal ion binding, zinc ion binding	regulation of transcription, DNA-dependent, transcription	nucleus
Q6ZNX7	1	-	Hypothetical protein LOC644686	644686	AK130436	Hs.689344	2p15
Q6ZP01	1	RBM44	RNA binding motif protein 44	375316	NM_001080504	Hs.709694	2q37.3		RNA binding|nucleotide binding|
Q6ZP14	1	-	Hypothetical protein LOC100129697	100129697	AK130238	Hs.689377	16q24.3
Q6ZRH9	1	-	Similar to hCG1791958	100131390	XM_001721888	Hs.516603	2q31.1
Q6ZRV2	1	FAM83H	Family with sequence similarity 83, member H	286077	AK127960	Hs.703688	8q24.3		ossification|
Q6ZTZ1	1	-	Hypothetical gene supported by BC043530	345222	NM_001042690 NM_001012982	Hs.442291	4p16.2
Q6ZU80	1	C14orf145	Chromosome 14 open reading frame 145	145508	NM_152446	Hs.162889	14q31.1
Q6ZUT6	1	C15orf52	Chromosome 15 open reading frame 52	388115	NM_207380	Hs.32433	15q15.1
Q6ZUU7	1	-	CDNA FLJ43318 fis, clone NT2RI2018311	100129484	AK125308	Hs.622969	Unknown
Q6ZVA0	1	-	Hypothetical FLJ42842	440446	AK124832	Hs.626751	17q21.33
Q6ZVF9	1	GPRIN3	GPRIN family member 3	285513	NM_198281	Hs.605082	4q22.1
Q6ZW80	1	-	Hypothetical gene supported by AK123485	440925	AK123485	Hs.668461	2q31.1
Q6ZWL1	1	ADAM32	ADAM metallopeptidase domain 32	203102	NM_145004	Hs.521545	8p11.23		integral to membrane|integrin-mediated signaling pathway|membrane|metalloendopeptidase activity|proteolysis|zinc ion binding|	ADAM_CR|Disintegrin|EGF|EGF_2|Pep_M12B_propep|Reprolysin|Toxin_31	metalloendopeptidase activity	proteolysis
Q71F56	1	MED13L	Mediator complex subunit 13-like	23389	NM_015335	Hs.654691	12q24.21		mediator complex|nucleus|receptor activity|regulation of transcription, DNA-dependent|transcription|	TRAP_240kDa
Q76B61	1	SSPO	SCO-spondin homolog (Bos taurus)	23145	NM_198455	Hs.632022	7q36.1		calcium ion binding|cell adhesion|extracellular region|hormone activity|protease inhibitor activity|protein binding|		nucleic acid binding, protein dimerization activity	regulation of transcription, DNA-dependent	intracellular
Q7L1I2	1	SV2B	Synaptic vesicle glycoprotein 2B	9899	NM_014848	Hs.592018	15q26.1	ECM-receptor interaction	acrosome|cell junction|cytoplasmic vesicle|integral to membrane|membrane|neurotransmitter transport|synapse|synaptic vesicle|transport|transporter activity|	MFS_1	transporter activity	transport	integral to membrane, membrane
Q7L622	1	KIAA1333	KIAA1333	55632	NM_017769	Hs.509008	14q12		cytoplasm|intracellular|ligase activity|metal ion binding|nucleus|protein binding|protein modification process|regulation of transcription, DNA-dependent|ubiquitin cycle|ubiquitin-protein ligase activity|zinc ion binding|	HECT
Q7L7X3	1	TAOK1	TAO kinase 1	57551	NM_020791	Hs.631758	17q11.2		ATP binding|cytoplasm|nucleotide binding|protein amino acid phosphorylation|protein serine/threonine kinase activity|transferase activity|	Pkinase	ATP binding, nucleotide binding, protein serine/threonine kinase activity, transferase activity	protein amino acid phosphorylation
Q7LDV4	1	TELO2	TEL2, telomere maintenance 2, homolog (S. cerevisiae)	9894	NM_016111	Hs.271044	16p13.3		chromosome|chromosome, telomeric region|cytoplasm|intracellular|membrane|nucleus|protein binding|
Q7RTV3	1	ZNF367	Zinc finger protein 367	195828	NM_153695	Hs.494557	9q22|9q22.32		intracellular|metal ion binding|nucleic acid binding|nucleus|regulation of transcription from RNA polymerase II promoter|transcription|transcription factor activity|zinc ion binding|	zf-C2H2	hydrolase activity, protein tyrosine phosphatase activity	cell division, protein amino acid dephosphorylation
Q7Z3B3	1	KIAA1267	KIAA1267	284058	NM_015443	Hs.648744	17q21.31		nucleus|protein binding|
Q7Z494	1	NPHP3	Nephronophthisis 3 (adolescent)	27031	NM_153240	Hs.511991	3q22.1		binding|kinesin complex|maintenance of organ identity|microtubule motor activity|photoreceptor cell maintenance|protein binding|	TPR_1|TPR_2	binding
Q7Z4M0	1	-	Hypothetical LOC283677	283677	NM_001042367	Hs.710119	15q22
Q7Z4R3	1	MAP4	Microtubule-associated protein 4	4134	NM_002375 NM_030884 NM_030885	Hs.517949	3p21		microtubule|microtubule associated complex|negative regulation of microtubule depolymerization|structural molecule activity|	Tubulin-binding	structural molecule activity	negative regulation of microtubule depolymerization	microtubule, microtubule associated complex
Q7Z4W7	1	RAB38	RAB38, member RAS oncogene family	23682	NM_022337	Hs.591975	11q14		###############################################################################################################################################################################################################################################################	Ras	GTP binding, GTPase activity, nucleotide binding	protein transport, small GTPase mediated signal transduction	cellular component unknown, membrane
Q7Z736	1	PLEKHH3	Pleckstrin homology domain containing, family H (with MyTH4 domain) member 3	79990	NM_024927	Hs.632251	17q21.31		cell adhesion|cytoskeleton|protein binding|	MyTH4|PH	protein binding	cell adhesion	cytoskeleton
Q7Z7H3	1	C2orf62	Chromosome 2 open reading frame 62	375307	NM_198559	Hs.645453	2q35
Q86SS6	1	SYT9	Synaptotagmin IX	143425	NM_175733	Hs.177193	11p15.4		calcium ion binding|cell junction|cytoplasmic vesicle|integral to membrane|membrane|synapse|synaptic vesicle|transport|transporter activity|	C2	calcium ion binding, transporter activity	transport	integral to membrane, membrane, synapse, synaptic vesicle
Q86ST5	1	CENTG3	Centaurin, gamma 3	116988	NM_031946 NM_001042535	Hs.647075	7q36.1		###############################################################################################################################################################################################################################################################	Ank|ArfGap|Miro|PH	GTP binding, GTPase activator activity, metal ion binding, zinc ion binding	regulation of GTPase activity, small GTPase mediated signal transduction
Q86T83	1	MYH9	Myosin, heavy chain 9, non-muscle	4627	NM_002473	Hs.474751	22q13.1	Regulation of actin cytoskeleton|Tight junction	###############################################################################################################################################################################################################################################################	IQ|Myosin_N|Myosin_head|Myosin_tail_1	ATP binding, actin binding, calmodulin binding, motor activity, nucleotide binding	regulation of cell shape, sensory perception of sound	myosin
Q86TB3	1	ALPK2	Alpha-kinase 2	115701	NM_052947	Hs.656805	18q21.31-q21.32		ATP binding|kinase activity|protein amino acid phosphorylation|protein serine/threonine kinase activity|transferase activity|	Alpha_kinase
Q86TD4	1	SRL	Sarcalumenin	6345	NM_001098814	Hs.10041	16p13.3		calcium ion binding|sarcoplasmic reticulum lumen|		calcium ion binding		sarcoplasmic reticulum
Q86UQ4	1	ABCA13	ATP-binding cassette, sub-family A (ABC1), member 13	154664	NM_152701	Hs.226568	7p12.3		ATP binding|ATPase activity|integral to membrane|membrane|nucleotide binding|transport|	ABC_tran
Q86V13	1	ECHDC2	Enoyl Coenzyme A hydratase domain containing 2	55268	NM_018281	Hs.476319	1p32.3		catalytic activity|fatty acid metabolic process|lipid metabolic process|lyase activity|metabolic process|mitochondrion|	ECH	3-hydroxybutyryl-CoA dehydratase activity, catalytic activity	metabolism
Q86V48	1	LUZP1	Leucine zipper protein 1	7798	NM_033631	Hs.257900	1p36		nucleus|	Prefoldin
Q86XE5	1	C10orf65	Chromosome 10 open reading frame 65	112817	NM_138413	Hs.180346	10q24.1		lyase activity|metabolic process|mitochondrion|	DHDPS
Q86XN7	1	C13orf23	Chromosome 13 open reading frame 23	80209	NM_025138 NM_170719	Hs.318526	13q13.3
Q86Y13	1	DZIP3	DAZ interacting protein 3, zinc finger	9666	NM_014648	Hs.409210	3q13.13	Tryptophan metabolism	RNA binding|cytoplasm|ligase activity|metal ion binding|polyubiquitin binding|protein binding|protein polyubiquitination|protein ubiquitination|ubiquitin cycle|ubiquitin ligase complex|ubiquitin-protein ligase activity|zinc ion binding|	zf-C3HC4	RNA binding, ligase activity, metal ion binding, polyubiquitin binding, protein binding, ubiquitin-protein ligase activity, zinc ion binding	protein polyubiquitination, ubiquitin cycle	cytoplasm
Q86Y22	1	COL23A1	Collagen, type XXIII, alpha 1	91522	NM_173465	Hs.660026	5q35.3		cytoplasm|integral to membrane|phosphate transport|plasma membrane|protein binding|structural molecule activity|	Collagen		phosphate transport	cytoplasm
Q86YS7	1	KIAA0528	KIAA0528	9847	NM_014802	Hs.271014	12p12.1		catalytic activity|membrane|protein binding|synaptic vesicle|transport|transporter activity|	C2	catalytic activity, transporter activity	transport	membrane, synaptic vesicle
Q8IV77	1	CNGA4	Cyclic nucleotide gated channel alpha 4	1262	NM_001037329	Hs.434618	11p15.4	Olfactory transduction	cAMP binding|integral to membrane|ion channel activity|ion transport|membrane|nucleotide binding|potassium channel activity|potassium ion transport|response to stimulus|sensory perception of smell|
Q8IVQ1	1	PCDHGB6	Protocadherin gamma subfamily A, 12	5098	###############################################################################################################################################################################################################################################################	Hs.368160	5q31		calcium ion binding|calcium-dependent cell-cell adhesion|cell adhesion|homophilic cell adhesion|integral to membrane|membrane|plasma membrane|protein binding|	Cadherin|Cadherin_2|Cadherin|Cadherin_2	calcium ion binding, protein binding	cell adhesion, homophilic cell adhesion	integral to membrane, membrane
Q8IVS2	1	MCAT	Malonyl CoA:ACP acyltransferase (mitochondrial)	27349	NM_173467 NM_014507	Hs.349111	22q13.31	Fatty acid biosynthesis	[acyl-carrier-protein] S-malonyltransferase activity|binding|fatty acid biosynthetic process|metabolic process|mitochondrion|transferase activity|	Acyl_transf_1
Q8IWV8	1	UBR2	Ubiquitin protein ligase E3 component n-recognin 2	23304	NM_015255	Hs.529925	6p21.1		ligase activity|metal ion binding|nucleus|protein binding|ubiquitin cycle|ubiquitin-protein ligase activity|zinc ion binding|	ClpS|zf-UBR	ligase activity, metal ion binding, ubiquitin-protein ligase activity, zinc ion binding	ubiquitin cycle	nucleus
Q8IX85	1	NBPF10	Neuroblastoma breakpoint family, member 10	55672	NM_001037675 NM_001039703	Hs.515947	1p36.13		cytoplasm|
Q8IY92	1	BTBD12	BTB (POZ) domain containing 12	84464	NM_032444	Hs.143681	16p13.3		protein binding|	BTB	protein binding
Q8IYT4	1	KATNAL2	Katanin p60 subunit A-like 2	83473	NM_031303	Hs.404137	18q21.1		ATP binding|nucleoside-triphosphatase activity|nucleotide binding|	AAA	ATP binding, nucleotide binding
Q8IYX7	1	FAM154A	Family with sequence similarity 154, member A	158297	NM_153707	Hs.98943	9p22.1
Q8N1L4	1	CYP4Z2P	Cytochrome P450 4Z2 pseudogene	163720	AK097373	Hs.591431	1p33		alkane 1-monooxygenase activity|electron carrier activity|endoplasmic reticulum|heme binding|iron ion binding|microsome|monooxygenase activity|oxidation reduction|		alkane 1-monooxygenase activity, heme binding, iron ion binding, metal ion binding, monooxygenase activity	electron transport	endoplasmic reticulum, microsome
Q8N206	1	ANKRD11	Ankyrin repeat domain 11	29123	NM_013275	Hs.335003	16q24.3		nucleus|	Ank			nucleus
Q8N2R8	1	FAM43A	Family with sequence similarity 43, member A	131583	NM_153690	Hs.708232	3q29
Q8N543	1	OGFOD1	2-oxoglutarate and iron-dependent oxygenase domain containing 1	55239	NM_018233	Hs.231883	16q13		###############################################################################################################################################################################################################################################################			protein metabolism
Q8N5U6	1	RNF10	Ring finger protein 10	9921	NM_014868	Hs.442798	12q24.31		cytoplasm|metal ion binding|protein binding|protein ubiquitination|ubiquitin ligase complex|ubiquitin-protein ligase activity|zinc ion binding|	zf-C3HC4	metal ion binding, protein binding, zinc ion binding
Q8N7D4	1	-	Hypothetical protein FLJ25770	339965	NM_001042784	Hs.529680	4q21.1
Q8N7E3	1	-	Hypothetical protein FLJ25770	339965	NM_001042784	Hs.529680	4q21.1
Q8N7X1	1	CXorf55	Chromosome X open reading frame 55	139804	AK097568	Hs.376008	Xq23
Q8N8E3	1	CCDC46	Coiled-coil domain containing 46	201134	NM_145036 NM_001037325	Hs.408676	17q24.1-q24.2
Q8N8G6	1	C15orf54	Chromosome 15 open reading frame 54	400360	NM_207445	Hs.376109	15q14
Q8N9N7	1	LRRC57	Leucine rich repeat containing 57	255252	NM_153260	Hs.234681	15q15.1		protein binding|	LRR_1
Q8N9T8	1	KRI1	KRI1 homolog (S. cerevisiae)	65095	NM_023008	Hs.709967	19p13.2			Krr1
Q8N9V6	1	ANKRD53	Ankyrin repeat domain 53	79998	NM_024933 NM_001115116	Hs.512744	2p13.3			Ank
Q8NBI6	1	C3orf21	Chromosome 3 open reading frame 21	152002	NM_152531	Hs.478741	3q29		integral to membrane|membrane|
Q8NCT1	1	ARRDC4	Arrestin domain containing 4	91947	NM_183376	Hs.6093	15q26.3			Arrestin_C|Arrestin_N
Q8NDC7	1	ARNT	Aryl hydrocarbon receptor nuclear translocator	405	NM_001668 NM_178427 NM_178426	Hs.632446	1q21	Ahr Signal Transduction Pathway|Erythropoietin mediated neuroprotection through NF-kB|Hypoxia-Inducible Factor in the Cardiovascular System|VEGF, Hypoxia, and Angiogenesis	###############################################################################################################################################################################################################################################################	HLH|PAS|PAS_3	protein binding, receptor activity, signal transducer activity, transcription coactivator activity, transcription factor activity, transcription factor activity, transcriptional activator activity	protein import into nucleus, translocation, regulation of transcription, DNA-dependent, signal transduction	nucleus, nucleus
Q8NE71	1	ABCF1	ATP-binding cassette, sub-family F (GCN20), member 1	23	NM_001025091 NM_001090	Hs.655285	6p21.33		ATP binding|ATPase activity|ATPase activity, coupled to transmembrane movement of substances|inflammatory response|nucleotide binding|translation|translation factor activity, nucleic acid binding|	AAA_5|ABC_tran|ATP-synt_ab|NACHT	ATP binding, ATP binding, ATPase activity, nucleotide binding, translation factor activity, nucleic acid binding	inflammatory response, protein biosynthesis
Q8NEM7	1	FAM48A	Family with sequence similarity 48, member A	55578	NM_001014286 NM_017569	Hs.435815	13q13.3		protein binding|
Q8NET8	1	TRPV3	Transient receptor potential cation channel, subfamily V, member 3	162514	NM_145068	Hs.446255	17p13.3		calcium channel activity|calcium ion binding|calcium ion transport|cation channel activity|cation transport|integral to membrane|ion channel activity|ion transport|membrane|	Ank|Ion_trans	calcium channel activity, calcium ion binding, cation channel activity	calcium ion transport, cation transport	integral to membrane, membrane
Q8NEZ3	1	WDR19	WD repeat domain 19	57728	NM_025132	Hs.438482	4p14		binding|intracellular protein transport|protein binding|vesicle-mediated transport|	Clathrin|WD40	binding		coated pit
Q8NFZ4	1	NLGN2	Neuroligin 2	57555	NM_020795	Hs.26229	17p13.1	Cell adhesion molecules (CAMs)	catalytic activity|cell-cell adhesion|cell-cell junction maintenance|integral to membrane|neurexin binding|postsynaptic membrane|synapse|synaptogenesis|	COesterase	catalytic activity, neurexin binding	cell-cell adhesion, intercellular junction maintenance, synaptogenesis	integral to membrane, postsynaptic membrane
Q8NG31	1	CASC5	Cancer susceptibility candidate 5	57082	NM_170589 NM_144508	Hs.181855	15q14		acrosome|acrosome formation|nucleus|protein binding|			acrosome formation	acrosome, nucleus
Q8NGT2	1	OR13J1	Olfactory receptor, family 13, subfamily J, member 1	392309	NM_001004487	Hs.527480	9p13.3		G-protein coupled receptor protein signaling pathway|integral to membrane|olfactory receptor activity|plasma membrane|receptor activity|response to stimulus|sensory perception|sensory perception of smell|signal transduction|	7tm_1	olfactory receptor activity, receptor activity	G-protein coupled receptor protein signaling pathway, response to stimulus, sensory perception of smell, signal transduction	integral to membrane, membrane
Q8NHU3	1	SGMS2	Sphingomyelin synthase 2	166929	NM_152621	Hs.595423	4q25	Sphingolipid metabolism	###############################################################################################################################################################################################################################################################
Q8NHW3	1	MAFA	V-maf musculoaponeurotic fibrosarcoma oncogene homolog A (avian)	389692	NM_201589	Hs.670866	8q24.3	Maturity onset diabetes of the young|Type II diabetes mellitus	###############################################################################################################################################################################################################################################################	Maf_N|bZIP_Maf
Q8TAB5	1	C1orf216	Chromosome 1 open reading frame 216	127703	NM_152374	Hs.112023	1p34.3
Q8TD26	1	CHD6	Chromodomain helicase DNA binding protein 6	84181	NM_032221	Hs.371979	20q12		###############################################################################################################################################################################################################################################################	Chromo|Helicase_C|SNF2_N|TCH
Q8TDI8	1	TMC1	Transmembrane channel-like 1	117531	NM_138691	Hs.670211	9q21.12		integral to membrane|membrane|sensory perception of sound|	TMC		sensory perception of sound	integral to membrane, membrane
Q8TEE1	1	MYO7B	Myosin VIIB	4648	AK023543	Hs.677195	2q21.1		ATP binding|actin binding|apical plasma membrane|binding|cytoskeleton|membrane|motor activity|myosin complex|nucleotide binding|		binding		cytoskeleton
Q8TEG4	1	CDH23	Cadherin-like 23	64072	NM_022124 NM_052836	Hs.656032	10q21-q22		###############################################################################################################################################################################################################################################################	Cadherin|Cadherin_2	calcium ion binding, protein binding	calcium-dependent cell-cell adhesion, cell adhesion, homophilic cell adhesion, response to stimulus, sensory perception of sound, visual perception	integral to membrane, membrane, membrane
Q8TEV9	1	SMCR8	Smith-Magenis syndrome chromosome region, candidate 8	140775	AF467440	Hs.707728	17p11.2		catalytic activity|
Q8WTU0	1	DDI1	DDI1, DNA-damage inducible 1, homolog 1 (S. cerevisiae)	414301	NM_001001711	Hs.591941	11q22.3		aspartic-type endopeptidase activity|protein modification process|proteolysis|	RVP|ubiquitin	aspartic-type endopeptidase activity	protein modification, proteolysis
Q8WTX9	1	ZDHHC1	Zinc finger, DHHC-type containing 1	29800	NM_013304	Hs.658333	16q22.1		DNA binding|biological_process|cellular_component|integral to membrane|membrane|metal ion binding|palmitoyltransferase activity|protein binding|protein palmitoylation|transferase activity|zinc ion binding|	zf-DHHC	DNA binding, acyltransferase activity, metal ion binding, protein binding, transferase activity, zinc ion binding	biological process unknown	cellular component unknown, integral to membrane, membrane
Q8WU39	1	-	Hypothetical protein MGC29506	51237	NM_016459	Hs.409563	5q23-q31		apoptosis|cytoplasm|extracellular region|
Q8WUV3	1	PRMT3	Protein arginine methyltransferase 3	10196	NM_005788	Hs.152337	11p15.1	Aminophosphonate metabolism|Androgen and estrogen metabolism|Histidine metabolism|Nitrobenzene degradation|Selenoamino acid metabolism|Tryptophan metabolism|Tyrosine metabolism	###############################################################################################################################################################################################################################################################	Methyltransf_11	metal ion binding, nucleic acid binding, protein-arginine N-methyltransferase activity, transferase activity, zinc ion binding	biological process unknown	cytoplasm, nucleus
Q8WVS4	1	WDR60	WD repeat domain 60	55112	NM_018051	Hs.389945	7q36.3			WD40
Q8WXE9	1	STON2	Stonin 2	85439	NM_033104	Hs.14248	14q31.1		clathrin adaptor complex|clathrin vesicle coat|cytoplasm|intracellular protein transport|membrane|protein binding|protein complex assembly|protein transporter activity|regulation of endocytosis|	Adap_comp_sub	protein binding	intracellular protein transport, regulation of endocytosis	clathrin vesicle coat, membrane
Q8WXH0	1	SYNE2	Spectrin repeat containing, nuclear envelope 2	23224	NM_182914 NM_015180 NM_182913 NM_182910	Hs.525392	14q23.2		actin binding|cytoplasm|cytoskeleton|integral to membrane|membrane|nuclear membrane|nucleus|structural molecule activity|	BRE1|CH|CSE2|ER_lumen_recept|KE2|Prefoldin|Spectrin	actin binding, structural molecule activity		cytoskeleton, integral to membrane, membrane
Q8WXH2	1	JPH3	Junctophilin 3	57338	NM_020655	Hs.592068	16q24.3		biological_process|endoplasmic reticulum|endoplasmic reticulum membrane|integral to membrane|molecular_function|plasma membrane|protein binding|	MORN	molecular function unknown	biological process unknown	endoplasmic reticulum, integral to membrane, membrane
Q8WYZ0	1	PLSCR3	Phospholipid scramblase 3	57048	NM_020360	Hs.655161	17p13.1		calcium ion binding|integral to membrane|phospholipid scramblase activity|phospholipid scrambling|plasma membrane|	Scramblase	calcium ion binding, phospholipid scramblase activity	phospholipid scrambling	integral to membrane, plasma membrane
Q92794	1	MYST3	MYST histone acetyltransferase (monocytic leukemia) 3	7994	NM_001099412 NM_001099413 NM_006766	Hs.491577	8p11	###############################################################################################################################################################################################################################################################	###############################################################################################################################################################################################################################################################	MOZ_SAS|PHD	DNA binding, acyltransferase activity, metal ion binding, protein binding, transferase activity, zinc ion binding	DNA packaging, chromatin modification, nucleosome assembly, regulation of transcription, DNA-dependent, transcription	nucleosome, nucleus
Q92887	1	ABCC2	ATP-binding cassette, sub-family C (CFTR/MRP), member 2	1244	NM_000392	Hs.368243	10q24	Nuclear Receptors in Lipid Metabolism and Toxicity	ATP binding|ATPase activity|ATPase activity, coupled to transmembrane movement of substances|integral to plasma membrane|membrane|nucleotide binding|organic anion transmembrane transporter activity|transport|transporter activity|	ABC_membrane|ABC_tran	ATP binding, ATPase activity, nucleotide binding, organic anion transporter activity, transporter activity	transport	integral to plasma membrane, membrane
Q93052	1	LPP	LIM domain containing preferred translocation partner in lipoma	4026	NM_005578	Hs.444362	3q28		biological_process|cell adhesion|cell junction|cellular_component|cytoplasm|metal ion binding|molecular_function|nucleus|plasma membrane|protein binding|zinc ion binding|	LIM	metal ion binding, molecular function unknown, protein binding, zinc ion binding	biological process unknown, cell adhesion	cellular component unknown, nucleus
Q969V3	1	NCLN	Nicalin homolog (zebrafish)	56926	NM_020170	Hs.657032	19p13.3		endoplasmic reticulum|endoplasmic reticulum membrane|integral to membrane|membrane|protein processing|			protein processing	endoplasmic reticulum, integral to membrane, membrane
Q96A83	1	EMID2	EMI domain containing 2	136227	NM_133457	Hs.654854	7q22.1		cytoplasm|extracellular region|phosphate transport|proteinaceous extracellular matrix|	Collagen|EMI		phosphate transport	cytoplasm, extracellular matrix (sensu Metazoa)
Q96AC6	1	KIFC2	Kinesin family member C2	90990	NM_145754	Hs.528713	8q24.3		ATP binding|microtubule|microtubule associated complex|microtubule motor activity|microtubule-based movement|nucleotide binding|	Kinesin	ATP binding, microtubule motor activity, nucleotide binding	microtubule-based movement	microtubule, microtubule associated complex
Q96AE4	1	FUBP1	Far upstream element (FUSE) binding protein 1	8880	NM_003902	Hs.567380	1p31.1		RNA binding|cytoplasm|nucleus|phosphate transport|protein binding|regulation of transcription, DNA-dependent|single-stranded DNA binding|transcription|transcription factor activity|transcription from RNA polymerase II promoter|	KH_1	single-stranded DNA binding, transcription factor activity	phosphate transport, regulation of transcription, DNA-dependent, transcription, transcription from RNA polymerase II promoter	cytoplasm, nucleus
Q96AN5	1	TMEM143	Transmembrane protein 143	55260	NM_018273	Hs.351335	19q13.32		integral to membrane|membrane|mitochondrion|
Q96BP2	1	CHCHD1	Coiled-coil-helix-coiled-coil-helix domain containing 1	118487	NM_203298	Hs.181174	10q22.2		nucleus|				nucleus
Q96CS2	1	CCDC5	Coiled-coil domain containing 5 (spindle associated)	115106	NM_138443	Hs.436617	18q21.1		cell cycle|cell division|cytoplasm|microtubule|mitosis|			cell cycle, cell division, mitosis	microtubule
Q96E51	1	KLF7	Kruppel-like factor 7 (ubiquitous)	8609	NM_003709	Hs.471221	2q32		intracellular|metal ion binding|nucleus|regulation of transcription from RNA polymerase II promoter|transcription|transcription coactivator activity|transcription factor activity|zinc ion binding|	zf-C2H2	metal ion binding, transcription coactivator activity, transcription factor activity, zinc ion binding	transcription	nucleus
Q96EP0	1	RNF31	Proteasome (prosome, macropain) activator subunit 2 (PA28 beta)	5721	NM_002818	Hs.434081	14q11.2	Antigen processing and presentation	cytosol|immune response|proteasome activator activity|proteasome activator complex|proteasome complex|	PA28_alpha|PA28_beta
Q96GE6	1	CALML4	Calmodulin-like 4	91860	NM_033429 NM_001031733	Hs.709550	15q23		calcium ion binding|
Q96H35	1	RBM18	RNA binding motif protein 18	92400	NM_033117	Hs.415842	9q33.2		RNA binding|nucleotide binding|	RRM_1
Q96K30	1	C12orf52	Chromosome 12 open reading frame 52	84934	NM_032848	Hs.524762	12q24.13
Q96KJ9	1	COX4I2	Cytochrome c oxidase subunit IV isoform 2 (lung)	84701	NM_032609	Hs.277101	20q11.21	Oxidative phosphorylation	###############################################################################################################################################################################################################################################################	COX4	cytochrome-c oxidase activity, oxidoreductase activity	cellular respiration, electron transport	membrane, mitochondrion, respiratory chain complex IV (sensu Eukaryota)
Q96KK3	1	KCNS1	Potassium voltage-gated channel, delayed-rectifier, subfamily S, member 1	3787	NM_002251	Hs.117780	20q12		###############################################################################################################################################################################################################################################################	Ion_trans|K_tetra	delayed rectifier potassium channel activity, potassium channel regulator activity, potassium ion binding, protein binding	cation transport, potassium ion transport	integral to membrane, plasma membrane, voltage-gated potassium channel complex
Q96LR5	1	UBE2E2	Ubiquitin-conjugating enzyme E2E 2 (UBC4/5 homolog, yeast)	7325	NM_152653	Hs.475688	3p24.2	Ubiquitin mediated proteolysis	ISG15 ligase activity|ISG15-protein conjugation|ligase activity|regulation of protein metabolic process|ubiquitin cycle|ubiquitin-protein ligase activity|	UQ_con	ligase activity, ubiquitin-protein ligase activity	ubiquitin cycle
Q96M60	1	GALK2	Chromosome 15 open reading frame 33	196951	NM_152647	Hs.695113	15q21.1-q21.2				ATP binding, galactokinase activity, galactokinase activity, kinase activity, nucleotide binding, transferase activity	carbohydrate phosphorylation, galactose metabolism, metabolism	cytoplasm
Q96MD3	1	-	Similar to hCG1989297	100132437	BI551505	Hs.709700	9q12
Q96NB2	1	SFXN2	Sideroflexin 2	118980	NM_178858	Hs.44070	10q24.32		cation transmembrane transporter activity|cation transport|integral to membrane|iron ion binding|iron ion transport|membrane|mitochondrial inner membrane|mitochondrion|transport|	Mtc	cation transporter activity, iron ion binding	cation transport, iron ion transport	integral to membrane, membrane, mitochondrion
Q96NB3	1	ZNF830	Coiled-coil domain containing 16	91603	NM_052857	Hs.413678	17q12		blastocyst growth|cell cycle|cell division|mitosis|multicellular organismal development|nucleic acid binding|nucleus|zinc ion binding|
Q96PU5	1	NEDD4L	Neural precursor cell expressed, developmentally down-regulated 4-like	23327	NM_015277	Hs.185677	18q21	Ubiquitin mediated proteolysis	###############################################################################################################################################################################################################################################################	C2|HECT|WW	ligase activity, protein binding, sodium channel regulator activity, ubiquitin-protein ligase activity	excretion, positive regulation of endocytosis, protein ubiquitination, regulation of protein catabolism, response to metal ion, sodium ion homeostasis, sodium ion transport, water homeostasis	intracellular
Q96QE3	1	ATAD5	ATPase family, AAA domain containing 5	79915	NM_024857	Hs.528902	17q11.2		ATP binding|nucleoside-triphosphatase activity|nucleotide binding|nucleus|response to DNA damage stimulus|transport|	AAA
Q96QV1	1	HHIP	Hedgehog interacting protein	64399	NM_022475	Hs.507991	4q28-q32	Hedgehog signaling pathway	###############################################################################################################################################################################################################################################################	EGF|EGF_2
Q96RG5	1	IRS2	Insulin receptor substrate 2	8660	NM_003749	Hs.442344	13q34	Adipocytokine signaling pathway|Insulin signaling pathway|Type II diabetes mellitus	###############################################################################################################################################################################################################################################################	IRS|PH	insulin receptor binding, signal transducer activity	glucose metabolism, positive regulation of cell proliferation, signal transduction
Q96S16	1	-	Hypothetical LOC339123	339123	NM_001005920	Hs.533771	16p13.3
Q96SI1	1	KCTD15	Potassium channel tetramerisation domain containing 15	79047	NM_024076	Hs.221873	19q13.11		ion channel activity|membrane|potassium ion transport|protein binding|voltage-gated potassium channel activity|voltage-gated potassium channel complex|	K_tetra
Q96T83	1	SLC9A7	Solute carrier family 9 (sodium/hydrogen exchanger), member 7	84679	NM_032591	Hs.496057	Xp11.3-p11.23|Xp11.3		###############################################################################################################################################################################################################################################################	Na_H_Exchanger	antiporter activity, potassium ion binding, potassium:hydrogen antiporter activity, protein homodimerization activity, sodium ion binding, sodium:hydrogen antiporter activity, solute:hydrogen antiporter activity	ion transport, potassium ion transport, regulation of pH, sodium ion transport	Golgi trans face, integral to membrane, membrane
Q99460	1	PSMD1	Proteasome (prosome, macropain) 26S subunit, non-ATPase, 1	5707	NM_002807	Hs.3887	2q37.1	Proteasome	cytosol|proteasome complex|proteasome regulatory particle|protein binding|	PC_rep	binding	regulation of progression through cell cycle	cytosol, proteasome regulatory particle (sensu Eukaryota)
Q99536	1	VAT1	Vesicle amine transport protein 1 homolog (T. californica)	10493	NM_006373	Hs.514199	17q21		DNA binding|binding|cell growth|integral to membrane|metabolic process|nucleus|oxidoreductase activity|synaptic vesicle|zinc ion binding|	ADH_N|ADH_zinc_N	DNA binding, oxidoreductase activity, zinc ion binding	cell growth	integral to membrane, nucleus, synaptic vesicle
Q99551	1	MTERF	Mitochondrial transcription termination factor	7978	NM_006980	Hs.532216	7q21-q22		DNA binding|double-stranded DNA binding|mitochondrion|regulation of transcription, DNA-dependent|termination of mitochondrial transcription|transcription|transcription termination factor activity|	mTERF	DNA binding, double-stranded DNA binding, transcription termination factor activity	regulation of transcription, DNA-dependent, transcription	mitochondrion
Q99623	1	PHB2	Prohibitin 2	11331	NM_007273	Hs.504620	12p13	CARM1 and Regulation of the Estrogen Receptor	###############################################################################################################################################################################################################################################################	Band_7	estrogen receptor binding, protein binding, receptor activity	negative regulation of transcription, regulation of transcription, DNA-dependent, transcription	cellular component unknown, membrane, mitochondrion, nucleus
Q99689	1	FEZ1	Fasciculation and elongation protein zeta 1 (zygin I)	9638	NM_022549 NM_005103	Hs.224008	11q24.2		axon guidance|cell adhesion|centrosome|cytoplasm|gamma-tubulin binding|nervous system development|plasma membrane|protein binding|	FEZ	protein binding	axon guidance, cell adhesion, nervous system development
Q99728	1	BARD1	BRCA1 associated RING domain 1	580	NM_000465	Hs.591642	2q34-q35	BRCA1-dependent Ub-ligase activity	###############################################################################################################################################################################################################################################################	Ank|BRCT	RNA binding, kinase binding, metal ion binding, protein binding, protein heterodimerization activity, protein homodimerization activity, ubiquitin-protein ligase activity, zinc ion binding	cell cycle arrest, negative regulation of apoptosis, negative regulation of mRNA 3'-end processing, negative regulation of protein export from nucleus, positive regulation of apoptosis, positive regulation of protein catabolism, protein ubiquitination, re	BRCA1-BARD1 complex, cytoplasm, nucleus, nucleus, ubiquitin ligase complex
Q9BQG1	1	SYT3	Synaptotagmin III	84258	NM_032298	Hs.515554	19q13.33		calcium ion binding|calcium-dependent phospholipid binding|cell junction|cytoplasmic vesicle|endosome|integral to membrane|membrane|protein binding|synapse|synaptic vesicle|syntaxin binding|transport|transporter activity|	C2	calcium ion binding, transporter activity	transport	integral to membrane, membrane, synapse, synaptic vesicle
Q9BRP1	1	PDCD2L	Programmed cell death 2-like	84306	NM_032346	Hs.515344	19q13.11		apoptosis|cytoplasm|	PDCD2_C
Q9BRQ3	1	NUDT22	Nudix (nucleoside diphosphate linked moiety X)-type motif 22	84304	NM_032344	Hs.656074	11q13.1
Q9BS26	1	TXNDC4	Thioredoxin domain containing 4 (endoplasmic reticulum)	23071	NM_015051	Hs.591899	9q31.1		###############################################################################################################################################################################################################################################################	Thioredoxin	protein disulfide isomerase activity, unfolded protein binding	electron transport, glycoprotein metabolism, protein folding, regulation of cell redox homeostasis, response to unfolded protein, secretory pathway	ER-Golgi intermediate compartment, endoplasmic reticulum lumen, endoplasmic reticulum membrane
Q9BVM4	1	-	Hypothetical protein BC004360	87769	XM_001714498	Hs.350868	13q32.3
Q9BW72	1	HIGD2A	HIG1 domain family, member 2A	192286	NM_138820	Hs.534575	5q35.2		integral to membrane|membrane|	HIG_1_N			integral to membrane, membrane
Q9BWT3	1	PAPOLG	Poly(A) polymerase gamma	64895	NM_022894	Hs.387471	2p16.1		RNA binding|RNA polyadenylation|mRNA processing|nucleic acid binding|nucleus|polynucleotide adenylyltransferase activity|transcription|transferase activity|	NTP_transf_2|PAP_RNA-bind|PAP_central	RNA binding, polynucleotide adenylyltransferase activity, transferase activity	mRNA processing, transcription	nucleus
Q9BX67	1	JAM3	Transcribed locus	83700	BX398529	Hs.700882	Unknown	Cell adhesion molecules (CAMs)|Epithelial cell signaling in Helicobacter pylori infection|Leukocyte transendothelial migration|Tight junction	integral to membrane|plasma membrane|				integral to membrane, membrane
Q9BXI3	1	NT5C1A	5'-nucleotidase, cytosolic IA	84618	NM_032526	Hs.307006	1p34.3-p33	Nicotinate and nicotinamide metabolism|Purine metabolism|Pyrimidine metabolism	5'-nucleotidase activity|cytoplasm|cytosol|hydrolase activity|magnesium ion binding|nucleoside metabolic process|nucleotide binding|nucleotide metabolic process|	5-nucleotidase	5'-nucleotidase activity, hydrolase activity, magnesium ion binding, nucleotide binding	nucleoside metabolism, nucleotide metabolism	cytosol
Q9BXQ7	1	CECR4	Similar to hCG1804364	27441	CA413957	Hs.660066	Unknown
Q9BXU7	1	USP26	Ubiquitin specific peptidase 26	83844	NM_031907	Hs.711470	Xq26.2		cysteine-type endopeptidase activity|cysteine-type peptidase activity|ubiquitin cycle|ubiquitin thiolesterase activity|ubiquitin-dependent protein catabolic process|	UCH	cysteine-type endopeptidase activity, ubiquitin thiolesterase activity	ubiquitin cycle, ubiquitin-dependent protein catabolism
Q9BYW2	1	SETD2	SET domain containing 2	29072	NM_014159	Hs.517941	3p21.31		###############################################################################################################################################################################################################################################################	Ribosomal_L38e|SET|WW	iron ion binding, oxidoreductase activity	metabolism
Q9BZS0	1	HIVEP3	Human immunodeficiency virus type I enhancer binding protein 3	59269	NM_024503	Hs.648369	1p34		DNA binding|intracellular|metal ion binding|nucleic acid binding|nucleus|positive regulation of transcription|regulation of transcription, DNA-dependent|transcription activator activity|transcription factor activity|zinc ion binding|	zf-C2H2	metal ion binding, nucleic acid binding, transcriptional activator activity, zinc ion binding	positive regulation of transcription	nucleus
Q9C073	1	FAM117A	Family with sequence similarity 117, member A	81558	NM_030802	Hs.514308	17q21.33
Q9C0D5	1	TANC1	Tetratricopeptide repeat, ankyrin repeat and coiled-coil containing 1	85461	NM_033394	Hs.158728	2q24.1-q24.2		binding|cell junction|postsynaptic membrane|synapse|	Ank|TPR_1|TPR_2
Q9H213	1	MAGEH1	Melanoma antigen family H, 1	28986	NM_014061	Hs.279819	Xp11.21		apoptosis|	MAGE		apoptosis
Q9H330	1	C9orf5	Chromosome 9 open reading frame 5	23731	AF086175	Hs.621479	9q31		biological_process|integral to membrane|membrane|molecular_function|		molecular function unknown	biological process unknown	integral to membrane, membrane
Q9H7P9	1	PLEKHG2	Pleckstrin homology domain containing, family G (with RhoGef domain) member 2	64857	NM_022835	Hs.631574	19q13.2		Rho guanyl-nucleotide exchange factor activity|guanyl-nucleotide exchange factor activity|intracellular|regulation of Rho protein signal transduction|	PH|RhoGEF	Rho guanyl-nucleotide exchange factor activity	regulation of Rho protein signal transduction	intracellular
Q9H7S9	1	ZNF703	Zinc finger protein 703	80139	NM_025069	Hs.288042	8p12		intracellular|metal ion binding|nucleic acid binding|nucleus|regulation of transcription, DNA-dependent|transcription|zinc ion binding|		metal ion binding, nucleic acid binding, zinc ion binding		nucleus
Q9HA64	1	-	Fructosamine-3-kinase-related protein	79672	NM_024619	Hs.31431	17q25.3		kinase activity|transferase activity|	APH
Q9HAT2	1	SIAE	Sialic acid acetylesterase	54414	NM_170601	Hs.10056	11q24		carboxylesterase activity|hydrolase activity|lysosome|sialate O-acetylesterase activity|	DUF303	hydrolase activity, serine esterase activity, sialate O-acetylesterase activity		lysosome
Q9HBK9	1	AS3MT	Arsenic (+3 oxidation state) methyltransferase	57412	NM_020682	Hs.709828	10q24.32		arsenite methyltransferase activity|arsonoacetate metabolic process|cytoplasm|cytosol|metabolic process|methylarsonite methyltransferase activity|methyltransferase activity|response to arsenic|soluble fraction|toxin metabolic process|transferase activity|	Methyltransf_11|Methyltransf_12|PCMT|Ubie_methyltran	arsenite methyltransferase activity, methylarsonite methyltransferase activity, transferase activity	arsonoacetate metabolism, toxin metabolism	cytosol
Q9HCN2	1	-	P53-regulated apoptosis-inducing protein 1	63970	BX431573	Hs.711194	11q24		apoptosis|mitochondrion|molecular_function|
Q9HCU4	1	CELSR2	Cadherin, EGF LAG seven-pass G-type receptor 2 (flamingo homolog, Drosophila)	1952	NM_001408	Hs.57652	1p21		###############################################################################################################################################################################################################################################################	7tm_2|Cadherin|EGF|GPS|HRM|Laminin_EGF|Laminin_G_2	G-protein coupled receptor activity, calcium ion binding, receptor activity, structural molecule activity	development, homophilic cell adhesion, neuropeptide signaling pathway, signal transduction	integral to membrane, membrane
Q9HDC5	1	JPH1	Junctophilin 1	56704	NM_020647	Hs.657367	8q21		Z disc|biological_process|integral to membrane|junctional membrane complex|microsome|molecular_function|muscle development|plasma membrane|sarcoplasmic reticulum|sarcoplasmic reticulum membrane|structural constituent of muscle|	MORN	molecular function unknown	biological process unknown	integral to membrane, junctional membrane complex, membrane, sarcoplasmic reticulum
Q9NP55	1	PLUNC	Palate, lung and nasal epithelium associated	51297	NM_130852 NM_016583	Hs.211092	20q11.2		extracellular region|innate immune response|lipid binding|molecular_function|	LBP_BPI_CETP	lipid binding, molecular function unknown	innate immune response, response to pathogenic bacteria	extracellular region
Q9NPA1	1	KCNMB3	Potassium large conductance calcium-activated channel, subfamily M beta member 3	27094	NM_171830 NM_171829 NM_014407 NM_171828	Hs.591285	3q26.3-q27		###############################################################################################################################################################################################################################################################	CaKB	calcium-activated potassium channel activity, ion channel activity, potassium channel regulator activity, protein binding	detection of calcium ion, generation of action potential, ion transport, potassium ion transport, potassium ion transport, regulation of action potential	membrane, voltage-gated potassium channel complex
Q9NQ36	1	SCUBE2	Signal peptide, CUB domain, EGF-like 2	57758	NM_020974	Hs.523468	11p15.3		calcium ion binding|	CUB|EGF|EGF_CA|GCC2_GCC3	calcium ion binding
Q9NR99	1	MXRA5	Matrix-remodelling associated 5	25878	NM_015419	Hs.369422	Xp22.33		ATP binding|cell adhesion|extracellular region|protein amino acid phosphorylation|protein binding|vascular endothelial growth factor receptor activity|	I-set|LRR_1|ig	ATP binding, vascular endothelial growth factor receptor activity	protein amino acid phosphorylation
Q9NRC6	1	SPTBN5	Spectrin, beta, non-erythrocytic 5	51332	NM_016642	Hs.709819	15q21		actin binding|actin cytoskeleton organization and biogenesis|barbed-end actin filament capping|cytoplasm|cytoskeleton|membrane|spectrin|	CH|PH|Spectrin	actin binding	actin cytoskeleton organization and biogenesis, barbed-end actin filament capping	cytoskeleton, membrane, spectrin
Q9NS39	1	ADARB2	Adenosine deaminase, RNA-specific, B2 (RED2 homolog rat)	105	NM_018702	Hs.657984	10p15.3		RNA binding|RNA processing|adenosine deaminase activity|double-stranded RNA binding|hydrolase activity|intracellular|mRNA processing|metal ion binding|nucleus|single-stranded RNA binding|zinc ion binding|	A_deamin|dsrm	RNA binding, adenosine deaminase activity, adenosine deaminase activity, double-stranded RNA binding, hydrolase activity, metal ion binding, single-stranded RNA binding, zinc ion binding	RNA processing, mRNA editing, mRNA processing	nucleus
Q9NS62	1	THSD1	Thrombospondin, type I, domain containing 1	55901	NM_018676 NM_199263	Hs.325667	13q14.3		cell surface|extracellular region|integral to membrane|membrane|	TSP_1
Q9NTI5	1	PDS5B	PDS5, regulator of cohesion maintenance, homolog B (S. cerevisiae)	23047	NM_015032	Hs.708081	13q12.3		###############################################################################################################################################################################################################################################################	AT_hook|HEAT
Q9NU02	1	ANKRD5	Ankyrin repeat domain 5	63926	NM_022096 NM_198798	Hs.70903	20pter-q11.23		calcium ion binding|	Ank	calcium ion binding
Q9NUP9	1	LIN7C	Transcribed locus	55327	BE962967	Hs.693840	Unknown		basolateral plasma membrane|cell junction|exocytosis|membrane|neurotransmitter secretion|plasma membrane|postsynaptic membrane|protein binding|protein transport|synapse|synaptosome|tight junction|		protein binding	exocytosis, protein transport	membrane, synaptosome, tight junction
Q9NUQ9	1	FAM49B	Family with sequence similarity 49, member B	51571	NM_016623	Hs.126941	8q24.21			DUF1394
Q9NX40	1	OCIAD1	OCIA domain containing 1	54940	NM_001079839 NM_017830 NM_001079841 NM_001079840 NM_001079842	Hs.518750	4p11		endosome|	OCIA
Q9NXE4	1	FAM128B	Sphingomyelin phosphodiesterase 4, neutral membrane (neutral sphingomyelinase-3)	55627	NM_017951 NM_017751	Hs.516450	2q21.1		###############################################################################################################################################################################################################################################################
Q9NXY9	1	TANC2	Tetratricopeptide repeat, ankyrin repeat and coiled-coil containing 2	26115	NM_025185	Hs.410889	17q23.3		binding|		binding
Q9NYJ8	1	MAP3K7IP2	Mitogen-activated protein kinase kinase kinase 7 interacting protein 2	23118	NM_015093	Hs.269775	6q25.1-q25.3	MAPK signaling pathway|Toll-Like Receptor Pathway|Toll-like receptor signaling pathway	cytoplasm|intracellular|kinase activity|membrane|metal ion binding|positive regulation of I-kappaB kinase/NF-kappaB cascade|protein binding|signal transducer activity|zinc ion binding|	CUE	kinase activity, signal transducer activity, zinc ion binding
Q9NZJ6	1	COQ3	Coenzyme Q3 homolog, methyltransferase (S. cerevisiae)	51805	NM_017421	Hs.709566	6q16.3	Ubiquinone biosynthesis	###############################################################################################################################################################################################################################################################	Methyltransf_11|Methyltransf_12	O-methyltransferase activity, transferase activity	ubiquinone biosynthesis	mitochondrion
Q9P0D0	1	SLC26A6	Solute carrier family 26, member 6	65010	AF150415 AF161369	Hs.663208	3p21.3		###############################################################################################################################################################################################################################################################		G-protein coupled receptor activity, calcium ion binding, structural molecule activity, sulfate porter activity, transporter activity	homophilic cell adhesion, neuropeptide signaling pathway, sulfate transport, transport	integral to membrane, membrane
Q9P104	1	DOK5	Docking protein 5	55816	NM_018431	Hs.656582	20q13.2		insulin receptor binding|	IRS|PH	insulin receptor binding
Q9P225	1	DNAH2	Dynein, axonemal, heavy chain 2	146754	NM_020877	Hs.367649	17p13.1		ATP binding|ATPase activity|axonemal dynein complex|ciliary or flagellar motility|cilium|dynein complex|microtubule|microtubule motor activity|microtubule-based movement|nucleotide binding|	DHC_N1	microtubule motor activity	ciliary or flagellar motility	axonemal dynein complex
Q9P2P6	1	STARD9	Similar to kinesin-like motor protein C20orf23	57519	XM_001129482	Hs.122061	15q15.2		ATP binding|microtubule|microtubule associated complex|microtubule motor activity|microtubule-based movement|nucleotide binding|		ATP binding, microtubule motor activity, nucleotide binding	microtubule-based movement	microtubule, microtubule associated complex
Q9UBI6	1	GNG12	Guanine nucleotide binding protein (G protein), gamma 12	55970	NM_018841	Hs.706861	1p31.3	MAPK signaling pathway|Regulation of actin cytoskeleton	G-protein coupled receptor protein signaling pathway|heterotrimeric G-protein complex|plasma membrane|signal transducer activity|signal transduction|	G-gamma	signal transducer activity	G-protein coupled receptor protein signaling pathway, signal transduction	heterotrimeric G-protein complex, membrane
Q9UBL3	1	ASH2L	Ash2 (absent, small, or homeotic)-like (Drosophila)	9070	NM_001105214 NM_004674	Hs.521530	8p11.2		DNA binding|hemopoiesis|histone methyltransferase complex|metal ion binding|nucleus|protein binding|regulation of transcription, DNA-dependent|transcription|transcription from RNA polymerase II promoter|transcription regulator activity|zinc ion binding|	SPRY	DNA binding, metal ion binding, protein binding, transcription regulator activity, zinc ion binding	hemopoiesis, regulation of transcription, DNA-dependent, transcription, transcription from RNA polymerase II promoter	nucleus
Q9UBP0	1	SPAST	Spastin	6683	NM_014946 NM_199436	Hs.468091	2p24-p21		ATP binding|cytoplasm|nucleoside-triphosphatase activity|nucleotide binding|nucleus|	AAA|AAA_3|AAA_5|Mg_chelatase	ATP binding, nucleoside-triphosphatase activity, nucleotide binding		nucleus
Q9UFF9	1	CNOT8	CCR4-NOT transcription complex, subunit 8	9337	NM_004779	Hs.26703	5q31-q33		cytoplasm|intracellular|negative regulation of cell proliferation|negative regulation of transcription|nucleic acid binding|nucleus|regulation of transcription, DNA-dependent|transcription|transcription factor activity|transcription repressor activity|	CAF1	transcription factor activity, transcriptional repressor activity	negative regulation of cell proliferation, negative regulation of transcription, regulation of transcription, DNA-dependent, transcription	nucleus
Q9UH65	1	-	SWAP-70 protein	23075	NM_015055	Hs.153026	11p15		ATP binding|DNA binding|calcium ion binding|cell projection|cytoplasm|isotype switching|nucleus|plasma membrane|protein binding|somatic cell DNA recombination|	PH
Q9UHG2	1	PCSK1N	Proprotein convertase subtilisin/kexin type 1 inhibitor	27344	NM_013271	Hs.522640	Xp11.23		###############################################################################################################################################################################################################################################################	ProSAAS
Q9UHI6	1	DDX20	DEAD (Asp-Glu-Ala-Asp) box polypeptide 20	11218	NM_007204	Hs.591405	1p21.1-p13.2	METS affect on Macrophage Differentiation	###############################################################################################################################################################################################################################################################	DEAD|Helicase_C	ATP binding, ATP-dependent RNA helicase activity, DNA binding, hydrolase activity, nucleotide binding, protein binding	assembly of spliceosomal tri-snRNP, nuclear mRNA splicing, via spliceosome	cytoplasm, cytoskeleton, spliceosome complex
Q9UKE5	1	TNIK	TRAF2 and NCK interacting kinase	23043	NM_015028	Hs.34024	3q26.2-q26.31		###############################################################################################################################################################################################################################################################	CNH|Pkinase	ATP binding, nucleotide binding, protein serine/threonine kinase activity, protein serine/threonine kinase activity, small GTPase regulator activity, transferase activity	JNK cascade, protein amino acid phosphorylation, protein kinase cascade, regulation of translation, response to stress	cellular component unknown
Q9UKG9	1	CROT	Carnitine O-octanoyltransferase	54677	NM_021151	Hs.125039	7q21.1		acyltransferase activity|carnitine O-octanoyltransferase activity|fatty acid metabolic process|fatty acid transport|generation of precursor metabolites and energy|lipid metabolic process|peroxisome|transferase activity|transport|	Carn_acyltransf	acyltransferase activity, carnitine O-octanoyltransferase activity, transferase activity	fatty acid metabolism, generation of precursor metabolites and energy, lipid metabolism, transport	peroxisome
Q9UKN8	1	GTF3C4	General transcription factor IIIC, polypeptide 4, 90kDa	9329	NM_012204	Hs.656646	9q34.13	RNA polymerase III transcription	###############################################################################################################################################################################################################################################################		DNA binding, H3/H4 histone acetyltransferase activity, RNA polymerase III transcription factor activity, acyltransferase activity, enzyme activator activity, transferase activity	transcription	nucleus, transcription factor TFIIIC complex
Q9ULC3	1	RAB23	RAB23, member RAS oncogene family	51715	NM_016277 NM_183227	Hs.555016	6p11	Hedgehog signaling pathway	###############################################################################################################################################################################################################################################################	Ras	GTP binding, nucleotide binding	protein transport, small GTPase mediated signal transduction	membrane
Q9ULE4	1	-	KIAA1276 protein	27146	XM_039169	Hs.655841	4p16
Q9UM00	1	TMCO1	Transmembrane and coiled-coil domains 1	54499	AK093302	Hs.706477	1q22-q25		Golgi apparatus|Golgi membrane|endoplasmic reticulum|endoplasmic reticulum membrane|integral to membrane|membrane|
Q9UNJ2	1	MYO9A	Myosin IXA	4649	NM_006901	Hs.546268	15q22-q23		ATP binding|intracellular|intracellular signaling cascade|metal ion binding|motor activity|myosin complex|nucleotide binding|visual perception|zinc ion binding|	C1_1|IQ|Myosin_head|RA|RhoGAP	ATP binding, motor activity	intracellular signaling cascade, visual perception	myosin
Q9UQ07	1	RAGE	Renal tumor antigen	5891	NM_014226	Hs.104119	14q32		ATP binding|cyclin-dependent protein kinase activity|cytoplasm|nucleotide binding|protein amino acid phosphorylation|protein binding|protein serine/threonine kinase activity|protein tyrosine kinase activity|signal transduction|transferase activity|	Pkinase	ATP binding, nucleotide binding, protein serine/threonine kinase activity, transferase activity	protein amino acid phosphorylation, signal transduction	cytoplasm
Q9UQ52	1	CNTN6	Contactin 6	27255	NM_014461	Hs.387300	3p26-p25		Notch signaling pathway|anchored to membrane|cell adhesion|central nervous system development|membrane|plasma membrane|protein binding|	I-set|fn3|ig	protein binding	Notch signaling pathway, cell adhesion, central nervous system development	membrane
Q9Y255	1	PRELID1	PRELI domain containing 1	27166	NM_013237	Hs.279529	5q35.3		immune response|mitochondrion|multicellular organismal development|	MSF1
Q9Y286	1	SIGLEC7	Sialic acid binding Ig-like lectin 7	27036	NM_014385 NM_016543	Hs.655393	19q13.3		cell adhesion|integral to plasma membrane|membrane|protein binding|receptor activity|sugar binding|	C2-set_2|I-set|V-set|ig	protein binding, receptor activity, sugar binding	cell adhesion	integral to plasma membrane, membrane
Q9Y2G0	1	EFR3B	EFR3 homolog B (S. cerevisiae)	22979	AB023170	Hs.654648	2p23.3		binding|
Q9Y2G1	1	C11orf9	Chromosome 11 open reading frame 9	745	NM_013279	Hs.473109	11q12-q13.1		integral to membrane|membrane|nucleus|regulation of transcription|transcription factor activity|	NDT80_PhoG
Q9Y2L5	1	KIAA1012	KIAA1012	22878	NM_014939	Hs.202001	18q12.1		ER to Golgi vesicle-mediated transport|Golgi apparatus|Golgi stack|binding|cis-Golgi network|transport|vesicle-mediated transport|		binding, intracellular transporter activity	ER to Golgi vesicle-mediated transport, transport	Golgi cis-face, Golgi stack
Q9Y3M8	1	STARD13	StAR-related lipid transfer (START) domain containing 13	90627	NM_178006 NM_178007 NM_052851	Hs.507704	13q12-q13		GTPase activator activity|cytoplasm|intracellular|membrane|mitochondrion|monolayer-surrounded lipid storage body|negative regulation of cell cycle|protein binding|signal transduction|	RhoGAP|SAM_2|START	GTPase activator activity, protein binding
Q9Y3Z3	1	SAMHD1	SAM domain and HD domain 1	25939	NM_015474	Hs.580681	20pter-q12		3',5'-cyclic-nucleotide phosphodiesterase activity|catalytic activity|immune response|intracellular|nucleus|signal transduction|	HD|SAM_2	3',5'-cyclic-nucleotide phosphodiesterase activity, catalytic activity	immune response, signal transduction	intracellular
Q9Y4A5	1	TRRAP	Transcribed locus	8295	AA099006	Hs.706926	Unknown	Multi-step Regulation of Transcription by Pitx2	###############################################################################################################################################################################################################################################################		protein binding, transcription cofactor activity	chromatin modification, histone acetylation, regulation of transcription, DNA-dependent, signal transduction, transcription	PCAF complex, TIP60 histone acetyltransferase complex, nucleus
Q9Y4F4	1	KIAA0423	KIAA0423	23116	NM_015091	Hs.371078	14q21.3		binding|	HEAT	binding
Q9Y4K4	1	MAP4K5	Mitogen-activated protein kinase kinase kinase kinase 5	11183	NM_198794 NM_006575	Hs.130491	14q11.2-q21	MAPKinase Signaling Pathway|The 4-1BB-dependent immune response	###############################################################################################################################################################################################################################################################	CNH|Pkinase|Pkinase_Tyr	ATP binding, nucleotide binding, protein binding, protein serine/threonine kinase activity, small GTPase regulator activity, transferase activity	activation of JNK activity, protein amino acid phosphorylation, protein kinase cascade, response to stress	cytoplasm
Q9Y5F6	1	PCDHGB6	Protocadherin gamma subfamily A, 12	5098	###############################################################################################################################################################################################################################################################	Hs.368160	5q31		calcium ion binding|calcium-dependent cell-cell adhesion|cell adhesion|homophilic cell adhesion|integral to membrane|membrane|plasma membrane|protein binding|	Cadherin|Cadherin_2|Cadherin|Cadherin_2	calcium ion binding, protein binding	cell adhesion, homophilic cell adhesion	integral to membrane, membrane
Q9Y5H5	1	PCDHA2	Protocadherin alpha 9	56142	###############################################################################################################################################################################################################################################################	Hs.199343	5q31		calcium ion binding|cell adhesion|extracellular region|homophilic cell adhesion|integral to plasma membrane|membrane|nervous system development|plasma membrane|protein binding|	Cadherin|Cadherin_2	calcium ion binding, protein binding	cell adhesion, homophilic cell adhesion, nervous system development	integral to plasma membrane, membrane
