# Supplementary material
Source: publisher figshare collection journal article supplement (https://karger.figshare.com/articles/dataset/_/5442364)
Supplement: Supplementary file 1 [file 1 › Table 2.xls]

## Sheet: P__Hood_Raw_Files_13_1_a.RAW
Scan(s)	Reference	MH+	z	Peptide	XC	DeltaCn	Sp	RSp	Ions	Count	Accession
13_1_a.21.21.2	Q5T3W0	730.409	2	R.KAGETPK.I	1.822	0.1902	280	25	38972	1
13_1_a.21.21.3	Q66GS8	1094.55	3	R.QSEGSNVVFK.G	1.4126	0.0438	298	28	14/36
13_1_a.29.29.1	H2A1_HUMAN	504.289	1	-.SGRGK.Q	1.0774	0.034	103.4	5	38876	16
13_1_a.36.36.2	ECHM_HUMAN	702.414	2	K.QAGLVSK.I	1.5388	0.1439	459.6	6	38972
13_1_a.36.36.3	Q6ZW19	1051.55	3	K.CGPAPRTPPR.G	1.1641	0.1833	184.8	329	13485
13_1_a.46.46.3	OR4M1_HUMAN	1058.46	3	K.HSGSGENTNR.A	1.1061	0.0412	361.8	53	13/36
13_1_a.46.46.2	SPTB2_HUMAN	704.394	2	R.QSKVDK.L	1.3944	0.1145	477.8	19	38970	1
13_1_a.54.54.1	PLEC1_HUMAN	594.23	1	K.NSCDR.S	1.0513	0.0575	209.5	2	38906
13_1_a.62.62.3	AKAP2_HUMAN	1568.83	3	K.KPPQLSEDDIWLK.S	1.3147	0.0177	265.5	26	14/48
13_1_a.62.62.2	EPLIN_HUMAN	1045.55	2	K.EDKPAETKK.L	1.0967	0.0013	247.9	17	38976
13_1_a.69.69.1	PPIE_HUMAN	544.309	1	K.DGKPK.Q	1.088	0.1426	152.2	58	38845	2
13_1_a.74.74.3	Q96C57	1099.54	3	R.EKEESPQPR.R	1.7648	0.0004	929.5	3	20/32
13_1_a.74.74.2	Q5EBN1	732.389	2	R.KAGEEAK.R	1.832	0.0058	495.3	65	39002	1
13_1_a.75.75.3	Q68DX1	1225.65	3	K.LTFYAVSAPEK.L	1.4324	0.0277	288.2	53	16/40
13_1_a.75.75.2	Q59HD6	818.4	2	R.GEESAGLR.W	1.317	0.0467	214.8	47	38943
13_1_a.76.76.1	GNRP_HUMAN	499.288	1	R.APSPK.P	1.1705	0.0306	84.9	63	38845
13_1_a.77.77.3	COX82_HUMAN	1142.7	3	-.MSVLTPLLLR.G	1.4012	0.0265	530.2	3	19/36
13_1_a.77.77.2	EF1G_HUMAN	761.379	2	K.QATENAK.E	1.7917	0.0244	397.7	8	39033
13_1_a.78.78.1	Q5KU26	533.304	1	R.GGKGSK.G	1.0199	0.0029	129.2	39	38878	1
13_1_a.80.80.1	Q9P2A7	516.325	1	R.RGVGK.A	1.1166	0.0176	55.3	191	38815	1
13_1_a.85.85.2	Q5VWL4	964.452	2	-.MVSEGSAAGR.D	1.4253	0.0147	471.3	1	13/18
13_1_a.85.85.3	Q5VU14	1445.68	3	K.GQEDAVAPGCKASGR.G	1.8366	0.1176	222.4	351	16/56
13_1_a.94.94.1	Q5T5Q2	557.304	1	R.QGAGPK.P	1.5037	0.1376	224.5	1	38908
13_1_a.95.95.2	Q96DN0	875.447	2	R.ESEGKTPK.V	1.4957	0.1044	569.1	5	13/14
13_1_a.95.95.3	Q8IZC4	1312.76	3	R.QKSIKDILDPR.S	1.4625	0.1465	425.7	74	18/40
13_1_a.98.98.3	CJ003_HUMAN	1223.63	3	K.EKNAYQLTEK.D	1.3246	0.0364	156.3	477	13455
13_1_a.98.98.2	PIGR_HUMAN	816.373	2	K.ADAAPDEK.V	1.2822	0.0546	137.6	386	38882	1
13_1_a.103.103.3	DNJB2_HUMAN	1319.66	3	K.NPDNKEFAEKK.F	1.4066	0.0514	165.3	424	15/40
13_1_a.103.103.2	Q5T655	878.546	2	K.KKYLAQK.R	1.4203	0.0291	210.6	75	38972
13_1_a.109.109.1	ARSB_HUMAN	559.356	1	K.QKGVK.N	1.1846	0	221.4	21	38876	4
13_1_a.112.112.1	PGCA_HUMAN	512.246	1	R.PSTAH.-	1.0529	0.3066	120	20	38845
13_1_a.114.114.2	Q8IYS4	721.311	2	K.EADSGSR.C	1.6143	0.0616	633.7	1	39063
13_1_a.114.114.3	Q8NBG4	1079.59	3	R.RWFACKIR.S	1.5817	0.0013	301.3	229	13/28	1
13_1_a.119.119.1	Q9UD04	502.298	1	R.GQGIK.R	1.3236	0.0338	129.3	19	38845
13_1_a.123.123.2	CRX_HUMAN	716.405	2	R.KAGTSPR.P	1.4612	0.0115	344.2	12	39033
13_1_a.123.123.3	Q6PQ33	1072.6	3	R.AGRGAQTGKAR.D	1.403	0.0681	347.9	34	16/40
13_1_a.124.124.3	DPOD1_HUMAN	1297.74	3	K.KRYAGLLFSSR.P	1.3723	0.0182	267.2	130	15/40	2
13_1_a.124.124.2	Q9H8E4	865.453	2	R.QTGFLGSR.-	1.5726	0.0041	251.1	72	39035
13_1_a.125.125.1	CNTN5_HUMAN	561.299	1	K.ESLGR.P	1.4962	0.0326	126.5	201	38845	11
13_1_a.128.128.1	RNT2_HUMAN	513.314	1	K.KTKH.-	1.0614	0.1627	181.7	4	38843
13_1_a.133.133.1	Q6ZMI3	602.337	1	K.GANGKR.G	1.2	0.1601	134.5	205	38878
13_1_a.136.136.3	CEP63_HUMAN	1590.74	3	R.ANDTICANELEIER.L	2.1495	0.0146	723.5	3	23/52
13_1_a.136.136.2	5HT1A_HUMAN	1059.54	2	K.AGGALCANGAVR.Q	2.0995	0.0097	392.1	18	39073
13_1_a.139.139.3	Q9NRE4	1547.68	3	R.GQSGGADEEGSGGRGAR.T	2.1552	0.061	383.7	105	23/64
13_1_a.139.139.2	WWP1_HUMAN	1032.47	2	K.TTQWEDPR.T	1.6972	0.0128	400	20	39004	1
13_1_a.146.146.2	Q5VUU2	884.531	2	K.EPKRGGLK.K	1.5347	0.042	449	53	39004	1
13_1_a.146.146.3	Q4U1Z6	1327.77	3	K.LTIPAVTKANSGR.Y	1.5559	0.187	363.9	308	15/48	2
13_1_a.149.149.1	Q53GN1	542.33	1	K.AGAVPK.M	1.0625	0.0551	198.7	1	38908
13_1_a.151.151.1	Q9HCY0	589.342	1	R.KTGQR.Q	1.3892	0	112.5	157	38845
13_1_a.159.159.3	Q96QE3	1661.89	3	R.RSGRISSTPTTETIR.G	1.4639	0.0029	449.5	9	21/56
13_1_a.159.159.2	RIMS1_HUMAN	1109.57	2	R.HIHGESSSKK.L	1.2112	0.0074	188.7	128	38978	3
13_1_a.160.160.2	Q8NAM9	699.378	2	R.ELAGPGR.G	1.334	0.0112	179.9	37	38941
13_1_a.160.160.3	Q6PK30	1050.52	3	R.QADGPHGRGR.G	1.7435	0.1121	339.8	13	16/36
13_1_a.162.162.1	Q6ZNP7	502.298	1	R.NAGLK.G	1.3082	0	265.7	4	38906
13_1_a.167.167.2	TFR2_HUMAN	948.551	2	R.VGVISFAQK.V	1.5147	0.1092	176.8	175	38945
13_1_a.167.167.3	Q9BSU9	1420.75	3	K.RDYLVDAATQIR.L	1.8994	0.1613	303.3	29	18/44	2
13_1_a.168.168.1	LRRN5_HUMAN	573.347	1	R.KGVGGR.R	1.287	0.0918	243.6	9	38939
13_1_a.174.174.2	Q5THM9	746.463	2	K.RSISKR.K	1.4601	0.0148	382.3	2	38970
13_1_a.174.174.3	MK67I_HUMAN	1117.63	3	R.QTSTKGQVLR.K	1.6205	0.2449	266.6	59	17/36
13_1_a.178.178.1	VEGFA_HUMAN	592.269	1	K.NTDSR.C	1.3672	0.0655	171.5	8	38906	2
13_1_a.182.182.1	SNX2_HUMAN	588.346	1	R.KEVGR.F	1.1725	0	83	102	38845	1
13_1_a.183.183.1	1B41_HUMAN	529.309	1	R.KEPR.A	1.0587	0	86.8	1	38813	26
13_1_a.190.190.3	FA38B_HUMAN	1096.51	3	K.VMDQQSFNK.F	1.1785	0.0636	200.6	85	11963
13_1_a.190.190.2	Q5T3W0	730.409	2	R.KAGETPK.I	1.5512	0.1619	410.3	9	39002	1
13_1_a.204.204.2	PCDA2_HUMAN	706.319	2	R.EELCGR.S	1.3407	0.0222	298.4	124	38908	7
13_1_a.204.204.3	SNIP1_HUMAN	1057.59	3	K.EKEVPAKEK.P	1.1578	0.0751	312.1	162	13/32
13_1_a.205.205.3	Q6ZSB5	1153.63	3	R.GSLQPQTPGIR.R	1.199	0.0559	252	106	15/40
13_1_a.205.205.2	GP1BA_HUMAN	768.473	2	R.VGPLVAGR.R	1.2415	0.0189	199.7	109	38974
13_1_a.207.207.2	Q6ZNP7	703.362	2	K.EADLQK.E	1.6393	0.0081	456	6	38970
13_1_a.207.207.3	RUSC2_HUMAN	1056.58	3	K.KTGGSGSPPLR.V	1.6443	0.216	409.6	14	17/40
13_1_a.213.213.3	Q6IPT4	1616.81	3	R.DLARWEAAQASKDR.S	1.747	0.0756	187.1	467	15/52
13_1_a.213.213.2	PDZK8_HUMAN	1076.61	2	K.SVNKTTGLTR.H	1.433	0.0616	162.7	127	39008
13_1_a.216.216.1	Q9UHS2	561.31	1	K.KGGSGR.P	1.2644	0.108	254.9	5	38939
13_1_a.220.220.3	STXB3_HUMAN	1566.79	3	R.KDRSAEETFQLSR.W	1.7103	0.0723	429.6	34	19/48
13_1_a.220.220.2	PTAFR_HUMAN	1045.59	2	K.TAQANTRKR.G	1.7354	0.0343	548	9	39067
13_1_a.222.222.2	Q5T6Z8	1090.63	2	R.YPASSLVVVR.S	1.4408	0.0117	136.4	261	38978	1
13_1_a.222.222.3	Q14333	1637.74	3	R.GSQTAHPQAEPCNAAR.G	1.3736	0.0054	299.4	16	21/60
13_1_a.223.223.3	BAT2_HUMAN	1486.79	3	K.PARGVGSGGQGPPPPR.R	1.4579	0.0321	532.2	2	23/60
13_1_a.223.223.2	Q96PH1	990.521	2	K.DSITGLQTR.T	1.4928	0.0183	272.9	27	39037
13_1_a.234.234.3	Q6ZMY1	1103.53	3	K.ESPQDSAITR.D	1.585	0.0991	316.4	75	16/36	1
13_1_a.234.234.2	K0329_HUMAN	734.379	2	K.KTEGGSR.S	1.1978	0.0258	208.6	158	38941	1
13_1_a.235.235.3	APAF_HUMAN	1142.57	3	K.FSSTSADKTAK.I	1.4453	0.0617	207.7	436	13/40
13_1_a.235.235.2	EF1G_HUMAN	761.379	2	K.QATENAK.E	2.2632	0.0428	347.9	88	38972
13_1_a.239.239.1	Q8N2X2	502.298	1	K.AIGNK.D	1.2059	0.0063	123.4	14	38876	1
13_1_a.240.240.1	ACHA6_HUMAN	500.319	1	R.PAKGK.L	1.0151	0	100	8	38845	4
13_1_a.242.242.3	Q5T0R2	1148.54	3	K.EFHTTGLAWS.-	1.4929	0.0672	378.3	3	16/36
13_1_a.242.242.2	GP125_HUMAN	764.372	2	R.EAKACSR.I	1.5186	0.0132	152.7	223	38910
13_1_a.244.244.2	OBP2A_HUMAN	788.415	2	R.KTEEPGK.F	1.7133	0.0924	191.5	159	39002	3
13_1_a.244.244.3	ZN291_HUMAN	1184.69	3	K.VRRIVAEEGR.T	1.1643	0.035	207.1	86	15/36
13_1_a.248.248.3	Q7RU00	1596.88	3	R.RPFIFYRAQVGSR.N	1.92	0.2336	206.1	325	17/48
13_1_a.248.248.2	ETBR2_HUMAN	1063.6	2	R.VSGGAPLHLGR.H	1.5069	0.0726	326.7	24	39071
13_1_a.250.250.1	GCN1L_HUMAN	519.252	1	R.DAASR.R	1.0112	0.0524	110.8	41	38845
13_1_a.251.251.2	ZBTB5_HUMAN	719.332	2	K.QSAEER.A	1.5901	0.0159	264.4	159	38939
13_1_a.251.251.3	Q5GM69	1080.53	3	K.QFTIASEER.V	1.7981	0.0829	198.6	811	12024
13_1_a.253.253.2	B3GN1_HUMAN	964.469	2	K.SSSQEKNGK.G	1.5014	0.0537	334.3	32	39037
13_1_a.253.253.3	Q70W33	1447.79	3	K.TPTPSVETLPHLR.P	1.7155	0.0904	393.7	109	20/48
13_1_a.254.254.3	Q96EK2	1098.63	3	R.QPRIAALSDK.Q	1.6559	0.0772	313.9	265	13/36
13_1_a.254.254.2	KCNQ5_HUMAN	732.364	2	R.QASVGDR.R	1.9331	0.0272	573.8	6	39002	1
13_1_a.255.255.3	Q8N2J0	1180.55	3	R.PGTHPGGGGSGGSR.K	1.7812	0.0763	466	7	25/52	1
13_1_a.255.255.2	CO4A5_HUMAN	786.41	2	K.GQAGATGPK.G	2.0142	0.1301	280.9	165	39006	2
13_1_a.259.259.1	Q5T5Q2	557.304	1	R.QGAGPK.P	1.0304	0.0001	234.2	3	38908
13_1_a.261.261.2	MYPC3_HUMAN	878.484	2	R.FKKDGQR.H	2.1406	0.0843	371.1	17	39033
13_1_a.261.261.3	Q96PX6	1315.71	3	K.DLEVKQEEVVK.E	2.2852	0.0124	450.3	59	19/40
13_1_a.278.278.1	Q96C74	586.294	1	R.EGGPAR.I	1.1117	0.0707	91.3	33	38878
13_1_a.282.282.3	CO3A1_HUMAN	1052.57	3	R.GEAGIPGVPGAK.G	1.4029	0.18	651	1	21/44	1
13_1_a.282.282.2	UN13D_HUMAN	700.446	2	R.QKAVVR.H	1.0242	0.0401	174.8	286	38908
13_1_a.283.283.1	Q96K90	556.309	1	K.GAPSPK.V	1.1193	0.072	121.4	13	38878	3
13_1_a.291.291.2	Q8N7Y8	821.477	2	K.EGLYLVK.A	1.4695	0.0316	257.9	146	38972
13_1_a.291.291.3	GCNT1_HUMAN	1232.74	3	R.RKYIVEPLSK.E	1.4319	0.0676	377.4	28	16/36
13_1_a.292.292.1	Q5T599	601.305	1	K.SGGPQR.N	1.0663	0.044	224	35	38878	2
13_1_a.293.293.3	TTC7B_HUMAN	1227.56	3	R.EQDVITCYEK.A	1.4669	0.0427	260.9	90	17/36
13_1_a.293.293.2	RT27_HUMAN	818.415	2	K.WEAREK.E	1.3479	0.0114	240	61	38908
13_1_a.295.295.1	TNKS1_HUMAN	576.274	1	R.DTQGR.N	1.2965	0	157.4	43	38876	1
13_1_a.296.296.3	DNJA4_HUMAN	1590.87	3	K.LISQAYEVLSDPKK.R	1.8009	0.1104	413.2	49	19/52
13_1_a.296.296.2	Q7L014	1060.57	2	R.SVKGGGGNEKK.S	2.1962	0.1357	403.3	65	13/20	1
13_1_a.298.298.3	Q9NRE4	1547.68	3	R.GQSGGADEEGSGGRGAR.T	1.9278	0.0275	366.9	83	23/64
13_1_a.298.298.2	RRBP1_HUMAN	1030.53	2	K.KAEGAQNQGK.K	3.069	0.3916	718.2	2	15/18	15
13_1_a.300.300.2	PTAFR_HUMAN	1045.59	2	K.TAQANTRKR.G	1.8799	0.1294	556.8	3	14/16
13_1_a.300.300.3	Q6ZVP9	1566.88	3	R.ALPLLNRDLPGMTR.R	1.5431	0.0288	295.5	61	16/52
13_1_a.301.302.2	Q96QE3	903.453	2	R.SGGGVLEER.P	1.5027	0.0245	323.1	5	39037
13_1_a.301.302.3	GAK11_HUMAN	1352.72	3	K.GPELVGPSESKPR.G	1.4314	0.1008	196.9	136	16/48	6
13_1_a.306.306.2	COX5A_HUMAN	943.582	2	R.ILEVVKDK.A	1.2598	0.0022	237.2	82	38974
13_1_a.306.306.3	Q8TEH0	1415.67	3	R.EGGDPGGRGVDPFR.C	1.7953	0.0895	367.1	15	19/52	1
13_1_a.307.307.1	SHC2_HUMAN	542.304	1	R.GPAAAR.A	1.0183	0.0118	111.2	56	38878
13_1_a.308.308.1	Q9P1M5	549.245	1	R.AGDMR.E	1.1323	0.0583	159.9	24	38876
13_1_a.310.310.1	AT12A_HUMAN	529.273	1	K.GAPER.I	1.0542	0.0731	99.1	71	38845	14
13_1_a.315.315.1	Q86T07	617.337	1	R.AGATAAR.P	1.3555	0.0304	154.9	30	38941
13_1_a.319.319.2	Q8TC05	1109.67	2	K.LGVSAPTIPVR.R	1.441	0.0502	123.1	386	39041
13_1_a.319.319.3	SLIT1_HUMAN	1661.74	3	R.PQCPQECACLDTVVR.C	1.7297	0.1576	344.6	17	22/56	1
13_1_a.324.324.3	Q6XYB7	1661.9	3	R.TAFTAQQVLELERR.F	1.8368	0.1809	232.4	105	17/52	1
13_1_a.325.325.1	Q9P1L8	648.331	1	R.GGVSGSGK.L	1.0234	0.0077	113.6	176	38912
13_1_a.327.327.2	CHCH1_HUMAN	1143.65	2	R.GRLARFGNPR.K	1.7179	0.004	233.5	34	39008
13_1_a.327.327.3	CHGUT_HUMAN	1714.86	3	R.ADVGDALETALEQLNR.R	1.6451	0.0421	266.4	104	20/60
13_1_a.328.328.1	MLL2_HUMAN	731.452	1	K.QRTAKK.A	1.4295	0.0579	170.7	61	38878	1
13_1_a.333.333.2	ZDHC6_HUMAN	745.432	2	K.QKADKR.V	1.7036	0.0095	416.1	25	39000
13_1_a.333.333.3	Q96JN1	1119.53	3	R.EDADVSVTQR.T	1.567	0.1215	279.5	161	14/36	2
13_1_a.338.338.1	TRPM8_HUMAN	592.345	1	K.NFALK.P	1.1043	0	151.6	1	38876	1
13_1_a.339.339.2	PCNT_HUMAN	1075.58	2	R.EGANLLSMLK.A	1.455	0.0628	119.5	254	39008
13_1_a.339.339.3	Q6NSJ5	1613.84	3	K.AGEGEKEKVLAEPEK.V	2.0479	0.2932	203.2	67	18/56
13_1_a.341.341.2	Q5VX66	874.463	2	R.GADGKVEAK.G	1.6852	0.0526	151.7	297	38945	1
13_1_a.341.341.3	Q13208	1312.63	3	R.QEATSVSCFRGK.G	1.4439	0.1438	123.7	347	13/44	1
13_1_a.350.350.3	TRIM2_HUMAN	1441.81	3	K.ASLQVQLDAVNKR.L	1.5784	0.0188	261.7	398	17/48
13_1_a.350.350.2	Q96MT6	960.529	2	K.QMLVDKAR.E	1.7656	0.0356	243.9	245	38974	1
13_1_a.351.351.3	Q8N9X8	1320.63	3	R.SLFEHEGACSLK.S	1.7912	0.0233	394.8	88	18/44	1
13_1_a.351.351.2	Q8IUY5	880.401	2	R.SSDAQASSK.G	1.234	0.0025	159.8	446	38976
13_1_a.352.352.3	Q8TAQ0	1656.91	3	R.RSVARTIAAELAENR.R	1.4397	0.079	321.5	36	19/56
13_1_a.352.352.2	SETX_HUMAN	1104.6	2	K.DDALAKTSKR.K	1.1555	0.1269	355.4	6	13/18
13_1_a.358.358.1	ACCN2_HUMAN	507.241	1	R.SSADK.G	1.1239	0.0005	131	10	38876	3
13_1_a.359.359.2	Q699U1	849.395	2	R.ENSISGDK.V	1.5309	0.0405	465.9	29	39065
13_1_a.359.359.3	Q6N063	1271.69	3	R.RQRLGQESAAR.K	1.8639	0.0694	378.4	149	17/40	1
13_1_a.366.366.3	IF4A1_HUMAN	1059.57	3	K.EELTLEGIR.Q	1.1858	0.0696	396	16	13/32	2
13_1_a.366.366.2	DNJCD_HUMAN	705.414	2	K.KSETLK.F	1.1832	0.0627	246.8	160	38908
13_1_a.367.367.2	Q86YV5	770.452	2	R.EKQLPR.L	1.4883	0.0078	575.6	1	39000
13_1_a.367.367.3	G6PI_HUMAN	1153.61	3	R.EHRSELNLR.R	1.4926	0.0089	302.9	31	15/32
13_1_a.370.370.3	Q9BY88	1078.57	3	R.EFEKLWAR.Y	2.0926	0.0081	589	37	17/28	1
13_1_a.370.370.2	CO9A3_HUMAN	719.332	2	K.EASEQR.I	1.9154	0.0386	269.9	263	38939	1
13_1_a.375.375.2	ADCY3_HUMAN	1048.5	2	K.EDKSERER.W	2.1934	0.0128	388.8	21	39004
13_1_a.375.375.3	Q58A45	1572.91	3	R.VMDPTKILITGKTR.L	1.7307	0.1387	646	2	24/52	1
13_1_a.376.376.1	Q6AZY7	560.286	1	R.GAMGPK.G	1.1187	0.0267	198	21	38908
13_1_a.378.378.1	LYG1_HUMAN	503.246	1	K.SPGDK.I	1.3725	0.0203	111.9	7	38845
13_1_a.381.381.1	Q96SM1	506.257	1	R.SSANK.D	1.0138	0.0603	75	38	38845
13_1_a.390.390.2	Q8NA55	799.417	2	R.QPRDQR.P	1.4135	0.0286	278.7	21	38939
13_1_a.390.390.3	FXL18_HUMAN	1197.74	3	K.VRQLVKEIGR.E	1.6591	0.1229	277.8	19	16/36
13_1_a.392.392.1	TRPS1_HUMAN	543.325	1	K.NGKPK.E	1.0484	0.0274	128.2	44	38845	1
13_1_a.394.394.1	DNMT1_HUMAN	502.262	1	R.SPGNK.G	1.1984	0.1549	132.5	4	38845	3
13_1_a.396.396.3	Q86YL6	1140.59	3	R.PQSVPPHHNK.L	1.4812	0.0442	258.3	233	13/36
13_1_a.396.396.2	APOC1_HUMAN	762.399	2	K.QSELSAK.M	1.8615	0.0018	604.6	2	39063
13_1_a.399.399.1	Q8N9P0	588.31	1	R.DVAGAR.G	1.3866	0.0158	134.8	65	38908
13_1_a.400.400.3	PTN1_HUMAN	1637.85	3	R.GAQAASPAKGEPSLPEK.D	1.7811	0.01	170.9	482	17/64
13_1_a.400.400.2	Q5T6Z8	1090.63	2	R.YPASSLVVVR.S	1.6638	0.0097	198.6	237	39008	1
13_1_a.404.404.2	UBP8_HUMAN	1063.54	2	K.EDKETSAKR.G	1.8394	0.0473	388.6	6	39067
13_1_a.404.404.3	Q9H0C8	1596.87	3	K.ASSVIFGLKGYVAER.K	1.6938	0.0114	297.2	105	20/56
13_1_a.406.406.3	USH1C_HUMAN	1571.87	3	R.ELQRQELLMQKR.L	1.9239	0.1482	287.7	19	18/44	1
13_1_a.406.406.2	Q5T7Q4	1046.55	2	K.QDKIQTGEK.H	2.0224	0.0295	199.7	256	38976
13_1_a.407.407.1	Q6ZNP7	502.298	1	R.NAGLK.G	1.1378	0	144.1	2	38876
13_1_a.410.410.1	GCN1L_HUMAN	519.252	1	R.DAASR.R	1.1566	0.0838	126.8	23	38876
13_1_a.411.411.3	L1CAM_HUMAN	1227.66	3	R.LMAEGAPKWPK.E	1.5762	0.0566	146.5	412	14/40
13_1_a.411.411.2	Q5TAT4	817.405	2	K.GEAGLDGAK.G	1.7233	0.0572	328.8	26	39037	4
13_1_a.412.412.3	Q9NWJ0	1099.62	3	R.QKAAVAEGAVR.V	1.9501	0.0314	951.6	2	20/40
13_1_a.412.412.2	Q5VUU2	732.364	2	K.EAGKDGR.G	2.3431	0.1161	898.6	2	39033	2
13_1_a.418.418.2	Q53FB5	919.484	2	K.GDTSGNLKK.I	1.8827	0.0127	216.8	168	38976	1
13_1_a.418.418.3	VEZA_HUMAN	1379.63	3	K.VSKNDTEEESNK.S	2.0351	0.0147	283.4	58	17/44	1
13_1_a.422.422.3	NUDT9_HUMAN	1447.74	3	R.WGPNHAADPIITR.W	1.3252	0.1187	438	17	21/48
13_1_a.422.422.2	BIG1_HUMAN	965.524	2	R.LMEKFAAR.Y	1.3606	0.103	295.1	7	38974	1
13_1_a.427.427.1	ST14_HUMAN	519.241	1	K.ENTGV.-	1.1135	0.055	166.2	5	38876
13_1_a.430.430.3	Q6J272	1237.65	3	R.RAYWKEWAK.R	1.5505	0.0829	264.8	440	14/32
13_1_a.430.430.2	UBP11_HUMAN	825.458	2	K.QHQLATK.K	1.6051	0.0713	455.3	4	39033
13_1_a.431.431.3	ANK1_HUMAN	1618.85	3	R.ELQFSVEDINRIR.V	1.7938	0.1201	189.7	128	17/48	2
13_1_a.431.431.2	DYH9_HUMAN	1078.53	2	R.WADAVQNFK.Q	1.3883	0.0077	131.3	166	38976
13_1_a.434.434.2	Q5T3W0	730.409	2	R.KAGETPK.I	1.8647	0.1255	594.2	1	39002	1
13_1_a.434.434.3	NUDT6_HUMAN	1094.54	3	R.WASGAQGYVR.N	1.4387	0.1345	464.2	8	14/36	1
13_1_a.436.436.1	CO1A1_HUMAN	586.294	1	K.GPAGER.G	1.6922	0.095	66.7	53	38878	2
13_1_a.437.437.3	ARHGF_HUMAN	1130.64	3	R.ASPLRTSRSR.P	1.346	0.0313	249.5	458	14/36
13_1_a.437.437.2	Q7M4L6	753.4	2	R.EAALGHR.W	1.504	0.0545	250.6	39	38972
13_1_a.439.439.2	SRC_HUMAN	810.494	2	K.KLRHEK.L	1.5159	0.0036	309.1	4	38970	2
13_1_a.439.439.3	Q3KP31	1216.57	3	R.SHTGERLCEGK.E	1.6785	0.0181	272.2	44	17/40
13_1_a.442.442.3	Q86TB3	1670.85	3	K.TAIWQVLQPSEGGER.I	1.6088	0.013	214.3	89	16/56
13_1_a.442.442.2	Q96MZ3	1113.56	2	K.TAELFFTER.T	1.5209	0.0522	368.9	5	39006
13_1_a.444.444.3	DTX3L_HUMAN	1055.59	3	K.LIFTVGYSR.V	1.3863	0.0026	170	105	13/32	1
13_1_a.444.444.2	RAB7_HUMAN	702.426	2	R.QVATKR.A	1.4214	0.0177	122.9	422	38908
13_1_a.445.445.3	Q9H9B0	1599.87	3	K.KGDIHGAFLIMLER.L	1.7781	0.0763	652	1	25/52
13_1_a.445.445.2	Q7Z5V7	1067.57	2	R.GDTDKYLKK.L	1.7697	0.1172	542.5	1	13/16
13_1_a.446.446.2	RRBP1_HUMAN	1030.53	2	K.KAEGAQNQGK.K	2.9558	0.3744	722.2	1	16/18	15
13_1_a.446.446.3	Q6ZN27	1545.8	3	K.AISEDLSQEAILEK.L	1.8309	0.0089	400.7	25	23/52
13_1_a.450.450.2	Q8N1R4	1061.52	2	R.GEGEREKEK.R	1.7097	0.0406	317.1	94	39006
13_1_a.450.450.3	Q68DF6	1591.82	3	R.RSQTTSLENGVFPR.W	1.7175	0.1164	350.2	43	18/52	1
13_1_a.453.453.3	Q9UGK6	1693.93	3	R.ALLTLAAGADGPPRQSR.S	1.7189	0.0211	130.7	877	17/64
13_1_a.453.453.2	RENT1_HUMAN	1129.65	2	R.WDLGLNKKR.I	1.9095	0.0315	458.3	1	13/16
13_1_a.454.454.1	Q6ZMI3	602.337	1	K.GANGKR.G	1.3566	0.0851	119.4	287	38878
13_1_a.460.460.1	Q5VTK7	576.274	1	R.GSGEAR.R	1.044	0.0319	135.8	24	38908	1
13_1_a.461.461.3	PCNT_HUMAN	1649.88	3	K.DEVPGSRLHLGSARR.A	1.62	0.0465	284.6	134	21/56
13_1_a.461.461.2	Q8IYA6	1099.63	2	R.PPMELKTKR.K	1.511	0.2198	187.3	34	38976
13_1_a.462.462.1	Q9P0C7	517.273	1	R.GGAGAGK.R	1.358	0.0536	126.5	16	38910
13_1_a.466.466.3	ZN366_HUMAN	1590.69	3	K.GDLGAEGGQERDCAGR.D	2.0276	0.0073	285.1	68	21/60
13_1_a.466.466.2	Q7L014	1060.57	2	R.SVKGGGGNEKK.S	2.3711	0.0423	249.7	240	39041	1
13_1_a.467.467.2	Q3MJA4	943.546	2	K.LLVEDINK.D	1.7011	0.1369	285.4	116	39004
13_1_a.467.467.3	WNT1_HUMAN	1415.68	3	R.FLMNLHNNEAGR.T	1.808	0.0654	297.4	176	19/44
13_1_a.468.468.3	AT10B_HUMAN	1230.74	3	K.SLISKAQKIDK.L	1.4713	0.0117	411	8	16/40
13_1_a.468.468.2	Q8IXT5	820.46	2	K.TSGALLMK.T	1.5854	0.1391	291.7	46	38974
13_1_a.469.469.1	RNT2_HUMAN	513.314	1	K.KTKH.-	1.0208	0.0032	153.5	4	38843
13_1_a.471.471.3	SPAT2_HUMAN	1358.78	3	R.VALQKSASERAAK.D	1.6007	0.0376	223.8	524	16/48
13_1_a.471.471.2	GBP2_HUMAN	904.473	2	K.AESAEAAKK.M	1.5561	0.0462	259.4	76	39006
13_1_a.475.475.3	ENOG_HUMAN	1224.61	3	K.EAIDKAGYTEK.I	2.0241	0.1112	321.5	4	17/40
13_1_a.475.475.2	Q7Z3N3	815.51	2	K.KSPLSKR.L	1.6043	0.0437	316.1	17	39002	1
13_1_a.476.476.1	Q6ZRP4	541.371	1	K.LIAPK.L	1.1409	0.0242	192.2	3	38876	1
13_1_a.477.477.2	Q6ZRI3	735.388	2	K.ETETKK.D	1.3136	0.0671	205.8	109	38908	1
13_1_a.477.477.3	MA2B2_HUMAN	1102.55	3	R.WSWRTGPGR.H	1.3425	0.0343	223.8	160	13/32
13_1_a.479.479.3	MYH6_HUMAN	1478.76	3	K.KKEFDINQQNSK.I	1.4468	0.1045	245.8	188	16/44
13_1_a.479.479.2	Q6P462	987.559	2	R.AFAGRRGPR.A	1.5777	0.0128	208.7	159	39006
13_1_a.480.480.2	AKAP8_HUMAN	883.536	2	K.KTSLHVAK.S	1.8836	0.1482	647.3	3	39065
13_1_a.480.480.3	Q9NWC0	1327.54	3	R.PCSHSWQCSHR.E	1.7985	0.0576	435.2	77	17/40
13_1_a.484.484.1	DSC2_HUMAN	575.303	1	K.LDAEK.L	1.2463	0.0315	141.4	17	38876	2
13_1_a.485.485.1	PYRD_HUMAN	730.421	1	R.QQKQAK.L	1.3313	0.0061	134.8	105	38878
13_1_a.486.486.3	FYV1_HUMAN	1542.8	3	K.KFDSVVVNGFVCTK.N	1.8635	0.1333	170.4	606	19/52
13_1_a.486.486.2	CALCR_HUMAN	1028.55	2	R.WGRRPSNR.S	1.3297	0.0448	94.2	750	38943
13_1_a.487.487.2	ADA21_HUMAN	989.495	2	K.RCGNGVVER.E	1.7125	0.0119	278.1	29	39006
13_1_a.487.487.3	AKAP5_HUMAN	1483.82	3	K.ALKPKAGSEAADVAR.K	1.7174	0.1199	379.9	8	20/56
13_1_a.488.488.2	XKR5_HUMAN	851.437	2	K.ELEAPHR.G	1.3199	0.122	350.4	1	38972
13_1_a.488.488.3	RPB9_HUMAN	1278.62	3	K.EAVFFQSHSAR.A	1.5153	0.0843	351.7	56	18/40
13_1_a.492.492.3	O60474	1070.57	3	R.QLPDLEDLK.K	2.0153	0.1131	323.3	33	17/32	2
13_1_a.492.492.2	SMRA3_HUMAN	713.43	2	K.KNPNIK.S	1.6469	0.0161	191	51	38939
13_1_a.493.493.3	IF3A_HUMAN	1118.63	3	R.RLGDSSLSRK.D	1.5235	0.1847	232.5	394	14/36	1
13_1_a.493.493.2	Q8N836	744.473	2	R.KSLLAGR.Q	1.6731	0.081	315.8	116	39002
13_1_a.494.494.2	MLH3_HUMAN	1045.61	2	R.KESIICKPK.N	1.8007	0.0242	282.7	71	39006
13_1_a.494.494.3	Q9BUT0	1566.88	3	-.MAPTLFQKLFSKR.T	1.27	0.0878	195	168	16/48	1
13_1_a.499.499.3	Q5SYQ3	1667.95	3	K.KAAEPTVDLLGLVWR.K	1.3301	0.002	492.2	2	19/56
13_1_a.499.499.2	Q9BUZ6	1112.48	2	R.PFQCACCGKR.F	1.4841	0.0462	498.1	3	39069	1
13_1_a.500.500.3	Q6NSJ5	1613.84	3	K.AGEGEKEKVLAEPEK.V	1.7419	0.2577	284	13	20/56
13_1_a.500.500.2	Q5T764	1075.51	2	R.GQDRETVDR.L	1.6913	0.0725	95.6	789	38976
13_1_a.501.501.2	DYI2_HUMAN	876.479	2	K.KETDQKK.E	1.8649	0	391.7	12	39063
13_1_a.501.501.3	Q9H7S2	1313.67	3	R.FPGAPPPWLAGGF.-	1.6026	0.0398	160.6	231	17/48
13_1_a.502.502.2	Q5T8A7	1141.61	2	K.KDGGPWPTRK.A	1.3559	0.192	100	252	38947	1
13_1_a.502.502.3	Q6ZWH3	1710.78	3	R.WCHSSPEELSSRHR.I	1.3368	0.0497	236.8	147	16/52
13_1_a.503.503.3	Q8N4F7	1661.88	3	R.THFLYGQILDWLR.Y	1.8967	0.0737	314.1	80	18/48
13_1_a.503.503.2	O60364	1108.65	2	K.YGSKKVGLTR.C	1.5468	0.0318	364.4	5	39069	2
13_1_a.504.504.1	Q9HD47	574.294	1	R.GEAAAR.Y	1.4431	0.001	222.7	8	38939
13_1_a.508.508.2	NSD1_HUMAN	780.4	2	R.FAATNTR.V	1.8559	0.1674	208.2	386	38941
13_1_a.508.508.3	LRP1B_HUMAN	1169.56	3	K.KDEFACSNKK.C	1.5013	0.0085	189.1	733	13485
13_1_a.512.512.2	CJ093_HUMAN	809.379	2	K.EEQFTR.P	1.9045	0.0648	519.3	2	39000
13_1_a.512.512.3	Q6ZMY0	1214.68	3	R.QKWHSLFLR.R	1.6807	0.0165	476.1	13	16/32	1
13_1_a.517.517.3	MSRE_HUMAN	1193.58	3	R.ESSIEECKIR.Q	1.5765	0.016	240.9	37	14/36	1
13_1_a.517.517.2	SRBP1_HUMAN	796.431	2	R.EHLLER.A	1.5153	0.0287	252.5	28	38939	2
13_1_a.520.520.2	TNNT1_HUMAN	849.425	2	R.QTGREMK.V	1.3634	0.0356	261.6	118	38972	1
13_1_a.520.520.3	Q6UWR7	1273.66	3	K.EAIPSRFYYK.K	1.5792	0.007	469.3	105	18/36	1
13_1_a.525.525.3	CO4A3_HUMAN	1153.68	3	R.GVPGMPGLKGLK.G	1.6959	0.082	488.1	1	23/44
13_1_a.525.525.2	NOL7_HUMAN	768.52	2	K.RLPVKR.A	1.512	0.0598	159.2	129	38908
13_1_a.533.533.3	CEP4_HUMAN	1181.59	3	R.QISTERYER.E	1.7101	0.0317	291	38	15/32
13_1_a.533.533.2	S23A2_HUMAN	787.479	2	K.KGVGKGNK.S	1.9664	0.0577	172.8	570	39004
13_1_a.536.536.3	Q9BUN1	1690.76	3	R.IILEDENDAMADADR.L	2.0266	0.1957	249.7	51	19/56
13_1_a.536.536.2	Q96K95	1127.58	2	R.GNELQPLSNR.T	1.7629	0.0092	157.8	198	39008
13_1_a.538.538.2	Q68CX8	1097.54	2	-.MGLPSGPGPER.L	1.542	0.0678	416.2	5	39071
13_1_a.538.538.3	MYO1F_HUMAN	1642.96	3	K.KVDIQALRGVSLSTR.Q	1.4343	0.0283	205.9	316	17/56	1
13_1_a.540.540.2	NPHP3_HUMAN	791.441	2	R.QKSFGPK.H	1.5996	0.0241	161.6	388	38972	1
13_1_a.540.540.3	BCS1_HUMAN	1187.73	3	R.KGVQLGLVAFR.R	1.7952	0.0039	129.7	684	13/40
13_1_a.541.541.2	CHD3_HUMAN	809.426	2	K.EGKGPGHK.R	1.4305	0.0176	183.6	284	38974	1
13_1_a.541.541.3	ATM_HUMAN	1212.5	3	K.GCCSQTDGLNSK.F	1.5904	0.0111	142.4	574	13/44
13_1_a.542.542.1	FRAP_HUMAN	504.278	1	K.SGNVK.D	1.311	0.0706	192	2	38906	1
13_1_a.543.543.2	Q6UXC7	1017.53	2	K.VSEALGQGTR.E	1.6031	0.059	201.7	245	39039	1
13_1_a.543.543.3	Q6ZTF1	1525.89	3	R.GCLVGQKSLGLVPVR.G	1.6485	0.0189	229.9	228	19/56
13_1_a.544.544.2	Q5SQN1	1144.57	2	R.LWDSSGVPQR.Q	1.6144	0.0768	206.1	90	38978
13_1_a.544.544.3	GCR_HUMAN	1716.82	3	K.AVSLSMGLYMGETETK.V	1.6843	0.0574	243.3	208	19/60
13_1_a.548.548.2	Q8NAG0	801.458	2	R.QKAELGR.F	1.553	0.0483	407.5	31	39002
13_1_a.548.548.3	SO1B1_HUMAN	1201.66	3	R.ASPEIVGKGCLK.E	1.6594	0.122	369.2	42	17/44
13_1_a.549.549.2	Q9HCC7	1057.62	2	K.WGKITSLPR.A	1.5095	0.0244	216.8	84	39006
13_1_a.549.549.3	GRAP1_HUMAN	1584.87	3	R.EILREKESSAVPAR.S	1.733	0.059	459.1	8	21/52	1
13_1_a.550.550.1	Q6AI54	648.32	1	R.DSADLK.T	1.2059	0.021	129.5	92	38878	3
13_1_a.551.551.3	Q9NWL2	1632.85	3	R.RSQPSLMGALGSSVSR.A	1.7052	0.1054	451.5	14	24/60
13_1_a.551.551.2	FTHFD_HUMAN	1088.6	2	R.WGKISARDR.G	1.5586	0.001	266.7	110	39037	1
13_1_a.552.552.2	Q6ZSQ5	757.432	2	R.GAVGLGGAR.S	1.6408	0.0294	265.3	7	39037
13_1_a.552.552.3	Q6AI17	1135.68	3	K.KVSLLEYRK.R	1.4883	0.0643	80.7	840	11963	4
13_1_a.554.554.1	CN155_HUMAN	505.262	1	K.SSSPK.A	1.1202	0.068	90.6	12	38845	5
13_1_a.555.555.1	MDC1_HUMAN	588.325	1	R.WGAVR.A	1.4728	0.006	107.8	66	38906	1
13_1_a.556.556.1	EPHB2_HUMAN	590.351	1	R.DVTKK.T	1.3185	0.0925	130	26	38845
13_1_a.557.557.3	Q96NH6	1266.6	3	K.QNEMIVEEFK.R	1.8676	0.1084	171.5	211	15/36	1
13_1_a.557.557.2	Q7Z3Q9	843.53	2	K.KTLPKEK.S	1.7716	0.0295	265.7	25	38972
13_1_a.558.558.3	PKHG1_HUMAN	1142.59	3	R.KSEPSSRSHK.V	1.749	0.1184	270.7	84	15/36	1
13_1_a.558.558.2	BORIS_HUMAN	761.415	2	K.EATKGQK.E	2.1403	0.0487	323.9	26	39002
13_1_a.560.560.3	MYOM1_HUMAN	1110.58	3	K.EIFEGPKYK.M	1.9562	0.001	171.8	437	12024	1
13_1_a.560.560.2	ZNF43_HUMAN	740.441	2	K.KIHTGGK.P	1.6727	0.0251	214.8	62	38941	5
13_1_a.563.563.1	ATP4A_HUMAN	503.257	1	K.AGGGGGK.R	1.1255	0.0627	99	45	38880
13_1_a.564.564.3	RM13_HUMAN	1470.79	3	K.MQPPGKLAAMASIR.L	1.8344	0.0542	269.6	253	17/52
13_1_a.564.564.2	Q5XKK7	979.514	2	K.RGPYMVTR.A	1.7967	0.0509	324.7	19	39004	1
13_1_a.565.565.2	Q3MV16	1004.54	2	K.EILEFPTR.E	1.7957	0.0746	339.3	18	39004
13_1_a.565.565.3	Q6N063	1505.79	3	R.GGQLHGARPLGTGER.W	1.5867	0.0186	215.1	248	16/56	1
13_1_a.566.566.2	SNPC3_HUMAN	727.363	2	R.KCFVCK.M	1.434	0.0316	405.2	9	38970
13_1_a.566.566.3	Q59H67	1092.52	3	K.KAPSASDSDSK.A	1.6142	0.076	487.9	3	19/40	2
13_1_a.567.567.3	CH013_HUMAN	1639.77	3	R.RMLNDATYELEER.D	1.9357	0.1507	255.6	235	19/48
13_1_a.567.567.2	DPP2_HUMAN	1094.57	2	R.FGNKTFPQR.F	1.3856	0.0223	151.7	333	39006	1
13_1_a.568.568.1	COX42_HUMAN	559.306	1	K.GGGGRR.G	1.4057	0.0495	200.7	25	38908
13_1_a.570.570.1	Q4VXM4	519.252	1	R.NGSNK.S	1.2122	0.0719	122.9	2	38876
13_1_a.571.571.2	MINT_HUMAN	977.476	2	R.SPSGSGSRSR.S	1.4203	0.0722	122.2	369	38947	2
13_1_a.571.571.3	Q9NTB5	1465.76	3	R.GLCLFKSGFPGPSR.Q	1.457	0.0278	289.4	26	17/52
13_1_a.572.572.3	DOCK2_HUMAN	1490.8	3	K.VVFTDLGNKDLNR.D	1.4863	0.0619	206.3	64	16/48
13_1_a.572.572.2	WASIP_HUMAN	993.527	2	R.FPVPSPGHR.S	1.272	0.0624	179.6	56	38976
13_1_a.573.573.3	Q6ZTN0	1529.69	3	-.MSSGNYQQSEALSK.P	1.8164	0.09	270.3	172	20/52
13_1_a.573.573.2	SHOX2_HUMAN	1020.44	2	K.EPTGCTEAGR.D	1.243	0.0068	121.1	497	38978
13_1_a.575.575.3	BAT4_HUMAN	1573.77	3	R.DQEGLGYRSAPQPR.V	1.7731	0.0026	224.7	84	17/52	2
13_1_a.575.575.2	ADCY3_HUMAN	1048.5	2	K.EDKSERER.W	1.9332	0.1047	595.6	1	39065
13_1_a.576.576.3	TAC2N_HUMAN	1597.8	3	R.SEVTRLYGSVCDLR.T	1.8024	0.0132	292.5	39	19/52
13_1_a.576.576.2	Q6ZT02	1066.5	2	R.LCWCWTVR.I	1.7273	0.0222	218.4	145	39004
13_1_a.578.578.2	Q6ZUE5	965.469	2	R.RCGGSSRSR.E	1.3254	0.0756	225.1	26	39006
13_1_a.578.578.3	ATX2L_HUMAN	1447.75	3	R.PSGETSVPPPPAVGR.M	1.2655	0.0216	223.5	160	18/56
13_1_a.580.580.3	Q5W0U4	1377.7	3	R.TVSPFLQLSDDR.K	1.8782	0.0217	208.5	525	14/44
13_1_a.580.580.2	Q6DJT9	919.521	2	K.SSGGVKEKK.H	2.0059	0.0042	470.3	88	13/16
13_1_a.581.581.3	Q5R3M6	1060.51	3	R.DAPSFSSPPR.Q	1.3039	0.0446	153.8	32	16/36
13_1_a.582.582.1	CO1A1_HUMAN	586.294	1	K.GPAGER.G	1.3154	0.0429	61.5	39	38878	2
13_1_a.583.583.2	CASR_HUMAN	764.489	2	K.KVHPRK.S	1.1928	0.0822	140.3	177	38878
13_1_a.583.583.3	CJ107_HUMAN	1148.63	3	K.QANAIIDYLK.I	1.2924	0.0882	220.9	135	15/36	2
13_1_a.584.584.3	Q6ZRS5	1445.78	3	-.MILAPEGSSSGKLR.I	1.1692	0.1118	165.2	433	15/52
13_1_a.584.584.2	Q86YA3	964.488	2	K.GSATSGVMVR.G	1.0389	0.0072	149.2	202	39008
13_1_a.588.588.3	SHAN2_HUMAN	1284.69	3	R.PGTSQPITLQSR.P	1.9003	0.0191	386.2	2	20/44
13_1_a.588.588.2	PRG4_HUMAN	856.441	2	K.EPSPTTPK.E	1.9593	0.0692	279.6	28	39035
13_1_a.589.589.3	Q96K90	1375.67	3	R.SPTSSKESPQEAK.R	1.9547	0.1231	391	47	20/48	2
13_1_a.589.589.2	Q9NS87	917.505	2	R.EKEKAGAGK.S	1.7276	0.0279	400	110	39067
13_1_a.594.594.1	GCN1L_HUMAN	519.252	1	R.DAASR.R	1.2138	0.0656	61	152	38815
13_1_a.596.596.2	Q5VTM8	812.462	2	K.KIPPDSR.I	1.2987	0.0856	124.3	112	38972
13_1_a.596.596.3	Q6ZVK0	1220.72	3	R.KQTQPRPLPR.T	1.3806	0.1062	94.8	247	15/36
13_1_a.598.598.1	CO1A1_HUMAN	586.294	1	K.GPAGER.G	1.6533	0.0446	69.1	47	38878	2
13_1_a.599.599.3	Q9NWJ0	1099.62	3	R.QKAAVAEGAVR.V	1.9987	0.0112	962.2	1	20/40
13_1_a.599.599.2	Q5VUU2	732.364	2	K.EAGKDGR.G	2.3886	0.1071	712.4	10	39002	2
13_1_a.600.600.2	XKR3_HUMAN	969.552	2	R.VGYFSIRK.S	1.5185	0.0511	218.5	11	38974
13_1_a.600.600.3	FANCJ_HUMAN	1453.74	3	K.RQYNDHHSKLR.G	1.8926	0.042	188.5	68	15/40
13_1_a.602.602.2	Q5T157	755.416	2	K.KPGNPSR.A	1.245	0.0493	399.7	1	39002
13_1_a.602.602.3	TNKS1_HUMAN	1129.57	3	K.EIGINAYGHR.H	1.3717	0.0499	526.3	5	19/36	1
13_1_a.603.603.2	Q6ZTR9	976.427	2	R.GDRGCSEPR.L	1.5801	0.0056	226.5	168	38976
13_1_a.603.603.3	SYT9_HUMAN	1463.68	3	R.SLDNDDGRRSNSK.A	1.5818	0.1058	265.1	67	19/48	1
13_1_a.605.605.2	TAOK3_HUMAN	1031.54	2	K.EAKVAAADEK.K	1.9681	0.0073	453.8	1	14/18	1
13_1_a.605.605.3	MBD4_HUMAN	1546.93	3	K.LLIATIFLNRTSGK.M	1.9509	0.1288	316.3	61	21/52
13_1_a.606.606.3	Q6ZUL2	1059.49	3	R.GPCNGRYHR.P	1.3508	0.0765	171.8	230	11994
13_1_a.606.606.2	TDG_HUMAN	705.425	2	K.KSGKSAK.S	1.234	0.0121	142.5	268	38941
13_1_a.607.607.2	CDT1_HUMAN	800.474	2	R.ELGARVR.A	1.4015	0.0108	257.6	157	38941
13_1_a.607.607.3	Q5VSX7	1199.61	3	R.RCITEHWVR.Q	1.4762	0.035	197.8	332	13/32	1
13_1_a.610.610.3	CU005_HUMAN	1238.65	3	K.RYGLATAHHGR.A	1.5597	0.0307	100.1	812	14946
13_1_a.610.610.2	LMBL3_HUMAN	824.499	2	K.QGLPPKGK.K	1.4045	0.0128	284.9	6	39004
13_1_a.611.611.2	ADCY3_HUMAN	1048.5	2	K.EDKSERER.W	2.249	0.0938	612.5	1	13/14
13_1_a.611.611.3	Q14109	1573.92	3	K.KPFVGSWVKGLISR.G	1.9203	0.0567	232.5	85	16/52
13_1_a.612.612.1	Q4ZGJ3	604.269	1	R.EGGGER.K	1.1533	0.0338	93.3	331	38878	2
13_1_a.613.613.3	FOXN1_HUMAN	1788.92	3	K.SMAKPEELDSLIGDKR.E	1.7982	0.0134	348.1	41	22/60
13_1_a.613.613.2	PRAX_HUMAN	1191.52	2	R.SGSGDQEEGGLR.V	1.7289	0.1819	280.6	2	13/22
13_1_a.614.614.2	Q5T3W0	730.409	2	R.KAGETPK.I	2.0928	0.1518	717.4	6	39002	1
13_1_a.614.614.3	AOFA_HUMAN	1095.62	3	K.KKICELYAK.V	1.5299	0.033	285.9	113	11994	1
13_1_a.616.616.3	Q8WY77	1654.8	3	K.SKDWAPASDRHQTR.S	1.5369	0.0208	273.1	73	17/52
13_1_a.616.616.2	Q3MJ16	1105.57	2	K.FQEELRQR.S	1.5026	0.1336	295	16	38974
13_1_a.619.619.3	ANKR7_HUMAN	1309.58	3	K.GADVNASDNYQR.T	2.6275	0.2231	416.8	46	20/44
13_1_a.619.619.2	Q8IYW5	871.488	2	R.KSDPVTPK.S	1.7652	0.0426	268.4	177	39004
13_1_a.620.620.3	SN_HUMAN	1270.77	3	R.MKVTKAPNLLR.V	1.2017	0.0421	219.7	164	16/40
13_1_a.620.620.2	Q6JSD6	848.393	2	K.CPNQTTGK.S	1.4856	0.0256	136.7	659	38912
13_1_a.624.624.1	Q6ZMI3	602.337	1	K.GANGKR.G	1.2597	0.0584	170	117	38878
13_1_a.628.628.2	Q5VUJ6	1061.51	2	R.KNEELGDEK.R	2.3462	0.156	425	16	39067
13_1_a.628.628.3	Q8TB02	1592.79	3	-.MDSKDVEVSSIQVR.R	1.8294	0.0125	390.8	56	18/52
13_1_a.629.629.3	Q5VTU6	1685.89	3	K.EEKVLHELFGTDIR.C	1.311	0.0269	361.6	49	21/52
13_1_a.629.629.2	Q8N4W1	1124.62	2	R.LAGALCPQVPR.T	1.6696	0.0371	133.8	684	38980	1
13_1_a.631.631.3	K1C9_HUMAN	1232.6	3	R.SGGGGGGGLGSGGSIR.S	1.2642	0.0446	401.1	5	23/60
13_1_a.631.631.2	FA49A_HUMAN	822.439	2	K.TSKIDMK.G	1.3384	0.0028	207.5	60	38941	1
13_1_a.634.634.2	VP13A_HUMAN	817.453	2	R.EGITRGGK.G	1.4985	0.0118	227.1	89	39004
13_1_a.634.634.3	MCM5_HUMAN	1228.63	3	R.VGTDRTGFTFK.Y	1.4454	0.0761	353.5	5	18/40
13_1_a.636.636.2	S6A12_HUMAN	816.446	2	R.EGLIAGEK.E	2.0977	0.0305	208.5	388	38943	1
13_1_a.636.636.3	Q8N7E8	1223.63	3	R.STALYPVVMDK.R	1.6116	0.0482	569.9	1	18/40
13_1_a.637.637.2	Q6ZVK8	987.508	2	R.DSGSRGRPR.A	1.5926	0.0884	200.5	49	38976
13_1_a.637.637.3	Q6ZRK9	1479.7	3	-.MISVSTPDCRQSR.V	1.4959	0.1671	377.9	10	22/48
13_1_a.639.639.3	TMOD2_HUMAN	1624.88	3	-.MALPFQKELEKYK.N	1.3765	0.0173	203.7	276	15/48
13_1_a.639.639.2	CLIC6_HUMAN	1083.54	2	K.KDANEIHEK.N	1.4326	0.0211	280.6	10	39006
13_1_a.642.642.2	Q5VTT5	990.533	2	R.DGSLLRSSR.R	1.6291	0.0304	361.9	1	39067	1
13_1_a.642.642.3	Q8N854	1487.85	3	K.ARLSSLESLLRDK.S	1.6733	0.0079	298	72	18/48
13_1_a.643.643.1	CI093_HUMAN	730.421	1	R.KEAGLGR.R	1.4061	0.024	251.2	10	38941	1
13_1_a.644.644.3	APXL_HUMAN	1630.85	3	R.GQDSWPVSSALLSKR.P	1.7506	0.0428	175	448	17/56
13_1_a.644.644.2	Q8TC83	1087.56	2	R.WDALREAAR.V	1.5152	0.0315	412.7	9	13/16	1
13_1_a.645.645.3	U124_HUMAN	1452.83	3	R.RDPKVVVQENLR.R	2.1661	0.2148	225.7	80	16/44
13_1_a.645.645.2	Q5XKE5	968.495	2	R.ALGGFGFGSR.A	2.1269	0.3426	296.5	3	39039
13_1_a.647.647.2	Q6PI96	944.577	2	K.ETLVKVQK.A	1.4913	0.0232	252.8	161	39035	1
13_1_a.647.647.3	SIA8D_HUMAN	1416.7	3	R.NESDREKFVHR.L	1.8428	0.0227	194.7	550	16/40
13_1_a.648.648.2	Q8WUC6	1154.54	2	K.GSTASRDFSQV.-	1.4574	0.047	158.1	181	39010
13_1_a.648.648.3	Q9H0N3	1731.96	3	R.AEQLKLFEVLVSEAR.Q	1.7449	0.0233	291.4	45	18/56
13_1_a.650.650.2	KI13B_HUMAN	713.394	2	R.LGAPEAR.R	1.5379	0.1212	533.1	1	39002
13_1_a.650.650.3	KPCN_HUMAN	1069.63	3	K.EIPLSEILR.I	1.5148	0.0251	543.6	6	16/32
13_1_a.652.652.3	Q4U1Z6	1118.53	3	K.GDEEIIETGR.Y	1.2956	0.0338	236.9	112	15/36	1
13_1_a.652.652.2	Q4U1Z6	746.427	2	K.RDATKR.T	1.4381	0.0247	480.8	9	38970	1
13_1_a.654.654.3	ADCY6_HUMAN	1567.8	3	R.QAFQETRGYIQAR.L	1.3929	0.0115	144.5	393	14/48
13_1_a.654.654.2	PTAFR_HUMAN	1045.59	2	K.TAQANTRKR.G	2.093	0.1677	462.7	8	39067
13_1_a.659.659.3	Q6IPM1	1100.45	3	K.FEARCGDSCL.-	1.7301	0.0606	329.7	51	15/36
13_1_a.659.659.2	ACSL4_HUMAN	734.35	2	R.EAANAMK.L	1.8006	0.0725	374.3	14	38972	1
13_1_a.660.660.2	GELS_HUMAN	1074.52	2	R.EGGQTAPASTR.L	2.1698	0.1201	337	60	13/20	1
13_1_a.660.660.3	CAC1H_HUMAN	1611.78	3	R.AQQRAAPGEPGWMGR.L	1.7254	0.0014	155.6	749	16/56
13_1_a.662.662.3	Q9NU63	1498.7	3	K.GKDLCQSSHHKCR.V	1.4199	0.0337	383.4	29	18/48	1
13_1_a.662.662.2	COPG_HUMAN	999.558	2	K.QPEKVAATR.Q	1.5848	0.0316	291.9	63	39006
13_1_a.663.663.3	O75541	1666.91	3	K.WALRRQNEPLEVR.L	1.5659	0.0933	344.5	61	19/48
13_1_a.663.663.2	Q5VV79	1111.59	2	K.EEVAHRDKK.R	1.5424	0.0124	283	34	39006
13_1_a.664.664.1	PTPRU_HUMAN	514.273	1	R.GGAGPR.L	1.039	0.0151	89	29	38878
13_1_a.669.669.3	Q8TEA7	1173.58	3	R.PTPDELMKDK.V	1.9161	0.0826	248.5	151	14/36	1
13_1_a.669.669.2	FBN3_HUMAN	781.297	2	R.EDGAMCR.D	1.6379	0.0258	227	109	38941	1
13_1_a.672.672.1	MTMR1_HUMAN	575.315	1	R.EVATR.A	1.0963	0.0335	124.6	69	38845	4
13_1_a.676.676.3	MARCO_HUMAN	1165.64	3	R.PGPPGLAGFPGAK.G	1.8304	0.0814	334.3	35	19/48
13_1_a.676.676.2	Q86XC3	777.418	2	K.EKLMEK.H	1.5734	0.0268	380.8	14	38970	1
13_1_a.678.678.2	Q49MG5	1068.58	2	K.KMEYLKEK.N	2.0634	0.0598	376.7	9	39004
13_1_a.678.678.3	ZN148_HUMAN	1602.91	3	R.FIQKYLLQRHEK.I	2.3628	0.2724	389	8	17/44	2
13_1_a.679.679.3	SLIT1_HUMAN	1661.74	3	R.PQCPQECACLDTVVR.C	1.6884	0.0579	492.8	5	23/56	1
13_1_a.679.679.2	Q6Q759	1107.56	2	K.EKGGTVNTSSK.I	1.8714	0.0371	413.8	6	14/20
13_1_a.685.685.2	Q6PF05	712.435	2	R.GLPVQAK.K	1.2039	0.1027	204.3	12	38941	1
13_1_a.685.685.3	Q9BVC5	1067.6	3	K.KREQHEIK.N	1.287	0.1075	170	79	39079
13_1_a.686.686.2	UBN1_HUMAN	724.435	2	K.KSKFSK.A	1.252	0.0118	151.8	214	38878
13_1_a.686.686.3	RGS1_HUMAN	1086.54	3	K.GTTHSLLDDK.M	1.6191	0.1669	221.8	188	13/36
13_1_a.687.687.3	Q6ZQQ2	1258.7	3	K.LGTTSSVPILDR.P	1.4297	0.0002	347.7	17	19/44
13_1_a.687.687.2	Q6RUV3	839.437	2	R.EGGPPGGLR.L	1.5148	0.1257	305.3	3	39067	1
13_1_a.688.688.3	Q7Z478	1152.66	3	R.QQLPVFKHR.D	1.4982	0.0133	228.9	16	15/32
13_1_a.688.688.2	NOL7_HUMAN	768.52	2	K.RLPVKR.A	1.5995	0.0022	261.8	14	38970
13_1_a.690.690.3	Q5EBM0	1185.6	3	R.RGVCAGAMAPPR.R	1.5954	0.0535	152.4	509	15/44	1
13_1_a.690.690.2	SFR17_HUMAN	789.458	2	R.SSSPKRK.K	1.4644	0.0571	198.3	98	38972
13_1_a.691.691.3	Q9ULD5	1414.81	3	R.ETLFQSRVLPPK.E	1.6861	0.0914	512.8	3	20/44
13_1_a.691.691.2	Q8N468	943.473	2	K.EDASSLPPK.F	1.5906	0.0255	476.6	3	39067
13_1_a.693.693.2	NOLC1_HUMAN	955.557	2	K.KSLGTQPPK.K	1.3147	0.0688	307.5	57	39037	1
13_1_a.693.693.3	REM2_HUMAN	1432.83	3	R.RSFSKVPETLLR.L	1.4287	0.0197	341.9	197	16/44
13_1_a.694.694.2	MUTYH_HUMAN	998.564	2	K.RDLPWRR.R	1.8046	0.0177	255.9	95	38972	2
13_1_a.694.694.3	Q8TBS2	1496.81	3	R.DTQQVTTLQLPPR.I	1.8092	0.0112	279.3	252	18/48
13_1_a.696.696.2	Q5VST9	1100.56	2	K.LEPQTVEER.S	1.5441	0.0543	261.1	47	39006
13_1_a.696.696.3	PHLPP_HUMAN	1648.78	3	R.CMLHPICLSNSFQR.Q	1.7758	0.063	434	17	23/52
13_1_a.698.698.2	COPG_HUMAN	787.467	2	R.AGAVSALAK.F	1.521	0.0837	229.4	10	39006
13_1_a.698.698.3	Q86YR7	1183.64	3	R.KEDLQIYFK.Y	1.7627	0.1431	153.4	257	14/32
13_1_a.700.700.2	PHF8_HUMAN	712.483	2	R.KLPRAK.P	1.1251	0.0319	137.7	69	38908	3
13_1_a.700.700.3	Q6ZUB7	1066.6	3	R.LGAAVSPPAQR.Q	1.4012	0.0281	156.6	116	15/40
13_1_a.701.701.2	MUC1_HUMAN	792.385	2	K.ETSATQR.S	1.6087	0.0199	279.2	42	38972	15
13_1_a.701.701.3	Q96Q96	1190.52	3	R.ENPCEGGSKNR.N	1.4735	0.0444	171.3	299	14/40	2
13_1_a.702.702.3	Q5SZB4	1216.62	3	R.AALGARGSGDWR.I	1.5124	0.0018	98.2	624	15/44
13_1_a.702.702.2	ELL3_HUMAN	813.389	2	K.QYPSYR.E	1.5465	0.0325	272.4	1	38970
13_1_a.703.703.3	DEND_HUMAN	1316.72	3	K.QPPRHSQTLPR.P	1.583	0.0041	263.5	120	17/40
13_1_a.703.703.2	Q6ZU31	876.352	2	R.QDCEPER.G	1.9433	0.0951	315.5	28	39002
13_1_a.704.704.3	RABE1_HUMAN	1646.82	3	R.AQQQLEQEFNQKR.A	1.6179	0.0177	171.3	442	16/48
13_1_a.704.704.2	DMAP1_HUMAN	1096.55	2	R.ESASSSSSVKK.A	1.6423	0.0348	337.6	13	15/20
13_1_a.706.706.2	Q96JG5	1189.6	2	R.NWTADKEGLR.A	1.5749	0.1432	202.4	26	39008
13_1_a.706.706.3	Q5BLQ2	1783.97	3	K.PVGLVATMLDREVLDR.L	2.1762	0.2717	374.6	5	21/60
13_1_a.707.707.3	TSSK4_HUMAN	1055.55	3	K.QHQSLQITT.-	1.2098	0.0679	146.2	718	11963	1
13_1_a.707.707.2	LRRC7_HUMAN	703.471	2	K.KLTTLK.V	1.2566	0.0001	215.4	145	38908	1
13_1_a.708.708.3	Q8WXI7	1665.91	3	R.RVDRVAIYEEFLR.M	1.6185	0.0555	144.1	815	15/48	1
13_1_a.708.708.2	O60494	1110.57	2	R.EGNATGHLVGR.Y	1.6671	0.0558	247.8	39	13/20
13_1_a.711.711.2	DCC_HUMAN	932.527	2	R.SSAQQRKK.R	1.6332	0.0328	342.6	29	39035
13_1_a.711.711.3	Q6ZQQ2	1399.76	3	R.QVSLVCPAVPTSAK.S	1.6131	0.0014	146.7	915	16/52
13_1_a.712.712.1	PTPRD_HUMAN	621.284	1	K.NGSSEK.R	1.0082	0.0147	151.8	5	38908	2
13_1_a.714.714.2	CO1A2_HUMAN	743.343	2	R.GPNGDAGR.P	1.4594	0.1244	436.3	7	39035	1
13_1_a.714.714.3	ATAD2_HUMAN	1117.6	3	K.QNSTLVGDKR.S	1.4232	0.0814	143.3	592	13485
13_1_a.716.716.2	PHF8_HUMAN	712.483	2	R.KLPRAK.P	1.1855	0.081	140.6	38	38908	3
13_1_a.716.716.3	Q9BVC5	1067.6	3	K.KREQHEIK.N	1.4374	0.0837	220.6	36	39079
13_1_a.718.718.3	ARP10_HUMAN	1589.8	3	K.IQAAKFNIDGNNER.P	1.6897	0.0364	256.3	318	16/52
13_1_a.718.718.2	Q6NXQ2	1059.59	2	R.KGAKNTDAVR.A	2.2567	0.0452	523.3	13	13/18
13_1_a.719.719.1	FRAP_HUMAN	504.278	1	K.SGNVK.D	1.1248	0.0142	88.1	12	38845	1
13_1_a.723.723.1	O75766	504.241	1	R.GGNEK.G	1.1682	0.0115	175	5	38876	3
13_1_a.724.724.1	O15014	503.282	1	R.SATPK.V	1.1775	0.0582	147.7	6	38876
13_1_a.725.725.3	DYH5_HUMAN	1139.66	3	R.NDIPQRLKR.Q	1.6443	0.1016	232.3	55	14/32	3
13_1_a.725.725.2	REV1_HUMAN	759.437	2	R.RGGWRK.R	1.4943	0.0004	156.8	590	38908
13_1_a.726.726.2	ADNP_HUMAN	723.44	2	R.KSFLTK.Y	1.5228	0.0224	171	132	38908
13_1_a.726.726.3	Q7Z4U1	1085.55	3	K.EDSVPPGKEK.E	1.4106	0.0208	210.1	200	13/36
13_1_a.727.727.3	Q4U1Z6	1146.62	3	K.ETIRDTRQK.V	1.6958	0.0002	161.7	413	13/32	1
13_1_a.727.727.2	SYT6_HUMAN	763.399	2	R.ETSIWK.D	1.796	0.0735	184	265	38908
13_1_a.728.728.2	Q7L211	1092.57	2	K.QLYELSPSR.T	1.8205	0.0252	428.2	9	39037
13_1_a.728.728.3	FUT8_HUMAN	1636.73	3	R.DNDHPDHSSRELSK.I	2.2281	0.1252	422.1	4	20/52
13_1_a.731.731.2	Q8N9I5	979.584	2	R.FQLFLRR.Y	1.6463	0.0113	157.4	181	38910
13_1_a.731.731.3	Q969V2	1470.83	3	R.RLHLFGRDSTIR.P	1.5708	0.0224	179.6	310	15/44
13_1_a.732.732.2	ABCF1_HUMAN	1087.59	2	R.ATGAAAAEAKAR.R	2.2824	0.1867	272.2	57	15/22	1
13_1_a.732.732.3	ABCA1_HUMAN	1630.94	3	K.LTQQQFVALLWKR.L	1.8082	0.071	253.5	80	20/48	1
13_1_a.733.733.2	Q5VZ66	995.527	2	R.QHEAELLR.V	1.3007	0.0081	92.7	269	38974
13_1_a.733.733.3	O43314	1494.76	3	R.KKLTSSGCIDDATR.G	1.3053	0.0939	147.4	414	18/52
13_1_a.734.734.2	Q8N281	758.488	2	R.RQIITK.I	1.6363	0	201.7	186	38908
13_1_a.734.734.3	IF2M_HUMAN	1134.6	3	R.KEHKEAHQK.A	1.5882	0.0542	186.7	245	12024
13_1_a.735.735.2	Q96S84	846.443	2	K.RSVAEER.A	1.7355	0.0559	209.1	43	38972
13_1_a.735.735.3	PINK1_HUMAN	1269.74	3	R.QSVAGLAARLQR.Q	1.1729	0.0836	199	90	17/44
13_1_a.736.736.2	Q6ZMY5	1096.51	2	K.MSGETSCILR.D	1.8164	0.0468	268.2	63	13/18	1
13_1_a.736.736.3	PLCC_HUMAN	1643.85	3	K.EAAQWLHKLYQEK.D	1.6744	0.0949	395.3	28	20/48
13_1_a.738.738.3	AOFA_HUMAN	1095.62	3	K.KKICELYAK.V	1.3905	0.0383	293.4	297	12024	1
13_1_a.738.738.2	Q5T3W0	730.409	2	R.KAGETPK.I	1.9967	0.1465	915.6	1	39063	1
13_1_a.739.739.2	Q7Z5Y2	1067.56	2	R.QHQRELEK.L	1.9203	0.0573	436.3	9	39004	2
13_1_a.739.739.3	Q96EK2	1602.85	3	R.HQNGDLKKQLHER.Q	2.4974	0.1812	392.9	10	19/48
13_1_a.741.741.2	Q96E51	1058.67	2	K.KAALSSVKVR.S	2.0154	0.0993	269.4	96	39039
13_1_a.741.741.3	AUTS2_HUMAN	1585.83	3	R.SRGGLGAGAAGGGGAGRTR.A	2.122	0.0475	397	83	25/72	1
13_1_a.742.742.1	Q6ZUF0	576.292	1	-.MAGAAR.W	1.5177	0.0768	216.4	9	38939
13_1_a.744.744.1	Q5T5Q2	557.304	1	R.QGAGPK.P	1.1382	0.014	217.4	1	38939
13_1_a.747.747.1	CO1A1_HUMAN	586.294	1	K.GPAGER.G	1.4498	0.0843	68.5	56	38878	2
13_1_a.748.748.3	Q8IUN5	1608.87	3	K.QGASPLPQGAQSRRR.R	1.6632	0.1452	230.3	144	17/56
13_1_a.748.748.2	NEBU_HUMAN	1073.59	2	K.KAGDALNEKK.Y	1.9213	0.0245	321.9	88	39039
13_1_a.749.749.2	Q8WZ42	728.346	2	K.EPEPEK.V	1.4789	0.055	220.7	185	38878
13_1_a.749.749.3	TTY7_HUMAN	1093.51	3	R.EDRQESTTK.A	1.7578	0.0324	451.5	22	16/32
13_1_a.750.750.2	M2OM_HUMAN	920.451	2	R.MQLSGEGAK.T	2.0712	0.0633	621.8	21	13/16
13_1_a.750.750.3	MTERF_HUMAN	1379.72	3	-.MQSLSLGQTSISK.G	1.7568	0.0396	814.2	1	26/48
13_1_a.752.752.1	CO1A1_HUMAN	586.294	1	K.GPAGER.G	1.3681	0.0312	70.8	33	38878	2
13_1_a.758.758.1	Q9C073	587.326	1	R.GGAGGLR.R	1.3022	0.0224	140.9	5	38972
13_1_a.759.759.1	Q4LE43	559.295	1	R.GAGAAGR.R	1.4821	0.0527	128.6	14	38941
13_1_a.763.763.2	TNG2_HUMAN	978.428	2	R.SWGGESAER.T	1.7478	0.1929	301	31	39037	3
13_1_a.763.763.3	Q96HY7	1465.93	3	R.KPLIVASPKMLLR.L	1.5022	0.0046	346.8	31	19/48
13_1_a.765.765.1	SAT2_HUMAN	516.35	1	R.KLAGK.-	1.3602	0.018	75.1	3	38845	1
13_1_a.767.767.1	YJDC_HUMAN	532.345	1	K.KSGLK.N	1.0133	0	92	10	38845	1
13_1_a.768.768.1	HIF1N_HUMAN	570.325	1	K.GAPTPK.R	1.1493	0.0885	153.4	17	38878
13_1_a.771.771.2	CAD26_HUMAN	752.453	2	R.KHGALAR.T	1.457	0.0209	157.7	182	38910
13_1_a.771.771.3	ARHGF_HUMAN	1130.64	3	R.ASPLRTSRSR.P	1.5575	0.0974	619.1	3	20/36
13_1_a.772.772.3	STAT2_HUMAN	1522.74	3	R.TEDPLLSWADFTK.R	1.5601	0.0116	536.7	15	23/48
13_1_a.772.772.2	SYNE1_HUMAN	1015.52	2	R.KEHMTLEK.G	1.7077	0.0505	214	328	38974	1
13_1_a.774.774.3	MXI1_HUMAN	1424.83	3	R.LKVLIPLGPDCTR.H	1.6865	0.0152	224.1	139	14/48	6
13_1_a.774.774.2	Q96BE7	951.527	2	R.FRGRPYR.G	1.7579	0.0078	329.3	31	38972
13_1_a.775.776.3	TAGL3_HUMAN	1449.73	3	R.GPSYGLSREVQEK.I	1.2259	0.0981	284.7	28	17/48
13_1_a.775.776.2	NPS_HUMAN	965.553	2	K.KTSFQRAK.S	1.432	0.0723	247.6	17	38974
13_1_a.778.778.3	Q96EK2	1098.63	3	R.QPRIAALSDK.Q	1.7853	0.1293	287	134	13/36
13_1_a.778.778.2	SCRT1_HUMAN	732.364	2	R.AGAGTEAR.A	2.0555	0.1383	265	247	38943
13_1_a.781.781.1	ATS15_HUMAN	502.335	1	K.KLNK.V	1.2175	0	144.5	11	38843	34
13_1_a.782.782.2	Q9Y4S4	1079.6	2	K.KFKGPEFAR.K	1.6311	0.1495	257.8	6	39006
13_1_a.782.782.3	ITLN2_HUMAN	1620.74	3	R.EFETCAFSFSSLPR.S	1.6043	0.0246	225.6	114	17/52
13_1_a.783.783.3	MA2A2_HUMAN	1656.9	3	R.RRFLWAEVSFFAK.W	1.6766	0.031	231.6	246	17/48
13_1_a.783.783.2	Q53TC9	1105.71	2	K.VPPLKIPVSR.I	1.6442	0.0331	418.7	5	13/18	1
13_1_a.784.784.1	FYB_HUMAN	617.325	1	K.NSATPK.Q	1.2938	0.0408	210.1	6	38939	1
13_1_a.786.786.1	Q86SI1	518.257	1	K.DGAGAK.E	1.1441	0.0181	78.4	96	38878	1
13_1_a.787.787.2	CO3A1_HUMAN	948.438	2	R.GDKGETGER.G	2.1037	0.1527	840.9	1	13/16
13_1_a.787.787.3	Q5SWD5	1422.69	3	K.ENLEYKVENER.L	1.6716	0.0764	345	23	15/40
13_1_a.788.788.2	CT046_HUMAN	960.574	2	R.RRTFVPGK.G	1.2703	0.0044	139.6	532	38974
13_1_a.788.788.3	BMR1B_HUMAN	1439.64	3	R.WSSDECLRQMGK.L	1.3254	0.0184	166.3	639	15/44
13_1_a.789.789.3	TREX2_HUMAN	1264.64	3	R.QGYSLGSLFHR.Y	1.3438	0.0117	218.2	84	14/40
13_1_a.789.789.2	PRD13_HUMAN	842.484	2	K.QGAGLALGR.L	1.5217	0.0952	243.4	34	39006	1
13_1_a.790.790.3	Q13344	1595.74	3	R.GRGRSSGGGGGSGGGYNR.S	1.702	0.0299	166.4	292	17/68
13_1_a.790.790.2	Q9NWH9	1063.61	2	R.SSKTQASVKK.E	1.8795	0.0427	171.7	160	39008
13_1_a.792.792.1	Q8IUC6	602.326	1	K.ADAVAR.L	1.4264	0.0558	253.3	1	38970
13_1_a.794.794.2	PIGR_HUMAN	816.373	2	K.ADAAPDEK.V	1.5412	0.0055	278.6	93	38974	1
13_1_a.794.794.3	O95678	1224.56	3	R.NMQDVVEDFK.V	1.3393	0.0303	235.1	130	14/36
13_1_a.795.795.3	CT032_HUMAN	1464.82	3	K.VVSSVAGLMLFVSR.K	1.8402	0.123	488	9	22/52
13_1_a.795.795.2	Q6NUJ5	975.417	2	K.EDGEPSWR.E	1.8887	0.0162	213.9	226	39004
13_1_a.797.797.2	Q96T57	701.417	2	R.KGARNR.K	1.8916	0.0143	315.8	10	38970
13_1_a.797.797.3	KI18A_HUMAN	1052.58	3	K.TRRSYLEK.R	1.3577	0.0568	222.1	30	13/28
13_1_a.798.798.3	Q5JR17	1177.65	3	-.ETIVNVLDFK.K	1.3467	0.1215	277.9	17	15/36
13_1_a.798.798.2	PDE3A_HUMAN	784.406	2	K.QSLGSHR.A	1.3721	0.0614	391.7	1	39002
13_1_a.800.800.2	Q8TCU4	740.321	2	R.YSEGER.T	1.3993	0.0876	236.5	16	38939
13_1_a.800.800.3	MATR3_HUMAN	1108.73	3	K.KLVLRIPNR.G	1.4566	0.0571	140.1	492	11994
13_1_a.802.802.3	DLGP1_HUMAN	1635.75	3	R.ELCEENLNPNAHPR.P	1.9565	0.0727	358.8	14	21/52
13_1_a.802.802.2	Q8N6K3	1091.58	2	K.IFNALQETR.A	1.9284	0.1324	290.6	37	39006	2
13_1_a.803.803.2	Q86T76	917.487	2	K.EGLCQIVR.R	1.7475	0.0935	419.6	36	39065
13_1_a.803.803.3	Q9BYE0	1375.75	3	R.AQLFSALHGYLR.P	2.2718	0.1935	450.1	12	21/44
13_1_a.805.805.3	FAT2_HUMAN	1223.64	3	K.KPFDYQALNK.Y	1.8232	0.0076	478.7	2	17/36
13_1_a.805.805.2	SHLB2_HUMAN	816.494	2	K.KAKAAEAK.A	1.5707	0.0555	243.2	170	38974
13_1_a.806.806.3	Q6ZQZ0	1488.74	3	R.GVDWSRGTLMGPGR.D	1.5284	0.1073	173.1	412	17/52
13_1_a.806.806.2	Q8WYH7	991.554	2	R.AGGRHGLAPR.A	1.3512	0.0329	440	3	39069
13_1_a.808.808.2	ADCY3_HUMAN	1048.5	2	K.EDKSERER.W	2.4551	0.1015	457.4	10	39035
13_1_a.808.808.3	Q14109	1573.92	3	K.KPFVGSWVKGLISR.G	2.019	0.0698	354.1	20	19/52
13_1_a.810.810.2	CO3A1_HUMAN	948.438	2	R.GDKGETGER.G	1.6636	0.1419	690.9	1	13/16
13_1_a.810.810.3	UBP7_HUMAN	1420.76	3	K.GTCVEGTIPKLFR.G	1.6532	0.0814	591.5	8	22/48	1
13_1_a.811.811.3	Q96IW2	1231.65	3	R.PPPRSPQPAER.V	1.6622	0.0389	182.6	691	14/40
13_1_a.811.811.2	Q6DN03	820.463	2	R.STITSRR.S	1.4481	0.096	269.3	21	38972
13_1_a.812.812.1	DLG5_HUMAN	590.289	1	K.NDVSR.E	1.1802	0.0259	198.7	11	38906	1
13_1_a.814.814.1	SCO1_HUMAN	607.309	1	K.EFSPK.L	1.231	0.0071	183.3	12	38876
13_1_a.816.816.2	BCL6_HUMAN	848.411	2	K.ASKEEER.P	1.4898	0.0851	246.3	42	38972
13_1_a.816.816.3	Q8IYZ1	1273.62	3	K.ELYKGGVCNYK.P	1.2532	0.0834	238.9	101	17/40
13_1_a.819.819.2	ITAL_HUMAN	747.443	2	R.KVEMLK.P	1.6651	0.0913	371.5	23	38970	1
13_1_a.819.819.3	Q9H2J5	1120.59	3	R.GLSWTGTSRR.L	1.7216	0.0285	356.5	121	18/36
13_1_a.820.820.3	Q5HYL8	1372.71	3	K.SLEQASLSPLGDR.R	1.5432	0.0042	392.1	29	20/48
13_1_a.820.820.2	Q96QN6	917.455	2	R.EGNSAQRR.L	1.4102	0.019	274	70	39004	2
13_1_a.821.821.3	HV3V_HUMAN	1568.85	3	R.QAPGKGLEWVTNIR.P	1.5331	0.0234	129.7	218	14/52
13_1_a.821.821.2	PTAFR_HUMAN	1045.59	2	K.TAQANTRKR.G	2.1398	0.1044	363.2	13	39037
13_1_a.824.824.1	HIF1N_HUMAN	570.325	1	K.GAPTPK.R	1.2766	0.0112	107.9	24	38847
13_1_a.828.828.3	TRPS1_HUMAN	1071.55	3	K.QNNGEQIIR.R	2.0093	0.0378	172.1	74	14/32
13_1_a.828.828.2	SMS2_HUMAN	714.389	2	K.NGNGKPK.S	1.5592	0.0444	194	15	38972
13_1_a.829.829.2	Q6ZV01	720.393	2	K.EPVFTK.L	1.575	0.0189	396.3	23	38939
13_1_a.829.829.3	LONM_HUMAN	1079.57	3	R.RTYVGAMPGK.I	2.1468	0.1497	352.1	130	16/36	2
13_1_a.831.831.3	COPA_HUMAN	1453.7	3	K.QQPLFVSGGDDYK.I	1.5776	0.0246	250.6	146	19/48	1
13_1_a.831.831.2	Q99619	970.463	2	K.EGGLYFER.R	1.5538	0.0227	227.4	142	39004
13_1_a.832.832.1	COBA1_HUMAN	574.294	1	K.GADGVR.G	1.1326	0.0208	114.4	40	38878	1
13_1_a.838.838.3	Q6ZTN0	1529.69	3	-.MSSGNYQQSEALSK.P	1.5793	0.0518	328.4	44	20/52
13_1_a.838.838.2	Q6P4B1	1019.58	2	K.KKESALSTR.D	1.7429	0.1276	275.8	27	39037	1
13_1_a.840.840.1	CS034_HUMAN	602.326	1	R.GALGER.A	1.2831	0.0171	136.8	40	38908
13_1_a.844.844.3	Q9NWB3	1196.58	3	R.NLGPTSSPMHR.P	1.4645	0.0392	204	40	14/40	1
13_1_a.844.844.2	PDLI5_HUMAN	796.406	2	K.QQNGPPR.K	1.5088	0.0247	319.7	17	38972
13_1_a.846.846.1	SIRT2_HUMAN	501.267	1	R.EKPQ.-	1.0705	0	60.2	27	38813
13_1_a.847.847.1	DIDO1_HUMAN	515.319	1	K.GTIPK.R	1.1747	0.0306	73.6	33	38845	1
13_1_a.852.852.3	Q86YJ6	1165.59	3	K.ETRCTLMRR.G	1.8001	0.0263	134.3	623	12024	1
13_1_a.852.852.2	Q5T9S5	777.429	2	K.KENMKK.D	1.4477	0.0333	202.9	36	38908	2
13_1_a.854.855.2	DNMT1_HUMAN	770.452	2	R.QKEIPR.V	1.7689	0.0178	409.5	2	39000
13_1_a.854.855.3	Q8N6Z3	1155.72	3	R.QIEAKALKVR.Q	1.7663	0.008	318.2	15	16/36	2
13_1_a.856.856.3	MSH3_HUMAN	1583.86	3	R.RKPASGGLAASSSAPAR.Q	1.5509	0.0093	413	6	25/64
13_1_a.856.856.2	RS10_HUMAN	1055.57	2	R.SRPETGRPR.P	1.5937	0.0706	182.6	132	39037	2
13_1_a.859.859.2	KCNH3_HUMAN	840.457	2	R.KALDEHK.E	1.6896	0.0138	186	192	38941
13_1_a.859.859.3	TAF6_HUMAN	1261.76	3	K.KAPPLLEGAPLR.L	1.8394	0.1543	151.6	541	13/44
13_1_a.860.860.2	SYM_HUMAN	884.531	2	K.QQGVLALR.P	1.4575	0.0262	292.7	84	39035	1
13_1_a.860.860.3	Q8IZU8	1328.67	3	K.LAQYFAMNKDK.K	1.5304	0.0519	331.2	155	17/40
13_1_a.861.861.3	Q9ULD5	1414.81	3	R.ETLFQSRVLPPK.E	1.5522	0.0219	246.2	367	15/44
13_1_a.861.861.2	BMPR2_HUMAN	943.51	2	K.LDPKEVDK.N	1.7623	0.0023	222.2	536	38974
13_1_a.864.864.3	HS90B_HUMAN	1835.81	3	K.EREKEISDDEAEEEK.G	1.5814	0.1967	321.1	282	17/56	1
13_1_a.864.864.2	FA43B_HUMAN	1222.71	2	K.MKLTLGPHGIR.M	1.492	0.1694	659.4	1	14/20
13_1_a.866.866.3	Q8NBV6	1816.02	3	R.HILFLGASIFSVAAALW.-	1.7277	0.1863	663.3	5	22/64
13_1_a.866.866.2	ZP1_HUMAN	1210.62	2	R.FKVVDEFGNR.F	1.6323	0.1286	568.3	4	14/18
13_1_a.867.867.2	Q53GQ4	792.385	2	R.QSQAGSSK.F	1.691	0.0632	274.5	8	39004
13_1_a.867.867.3	SUCB2_HUMAN	1187.64	3	K.PANFLDLGGGVK.E	1.5439	0.0261	297.1	70	17/44
13_1_a.868.868.2	MCRS1_HUMAN	813.483	2	K.QPLQVTK.D	1.9495	0.0107	263.2	74	38972
13_1_a.868.868.3	LAMB1_HUMAN	1219.66	3	K.ELAEQLEFIK.N	1.7835	0.1072	212.4	99	14/36
13_1_a.869.869.2	MY18B_HUMAN	958.532	2	R.DQSIVALGR.S	1.5343	0.0121	216	289	38976
13_1_a.869.869.3	Q6ZMJ1	1437.72	3	K.VTIDGTGVSCRVCK.V	1.4815	0.0066	178.5	374	17/52	2
13_1_a.870.870.3	TBD_HUMAN	1184.5	3	K.YGQHACFCQK.Q	1.6764	0.1381	410	6	18/36	1
13_1_a.870.870.2	NIFUN_HUMAN	789.447	2	K.KGEAEKK.-	1.6425	0.0148	241.6	159	38941
13_1_a.871.871.2	Q86UR2	928.594	2	K.AEKARLLK.G	1.4543	0.0057	192.4	246	39004	2
13_1_a.871.871.3	Q8IYZ0	1391.68	3	K.FSLDTVINPDDR.V	1.7927	0.007	371.3	43	19/44
13_1_a.872.872.3	Q96M60	1309.68	3	R.QFARNQKDFR.I	1.6519	0.0484	230.8	136	16/36
13_1_a.872.872.2	IN35_HUMAN	873.468	2	R.KELGDSPK.D	2.0083	0.0755	377.7	26	39035
13_1_a.874.874.3	Q8WY77	1654.8	3	K.SKDWAPASDRHQTR.S	1.4648	0.0048	196.7	209	15/52
13_1_a.874.874.2	Q3V6T2	1103.63	2	K.KSLEIKEEK.I	2.1442	0.107	678.2	1	13/16
13_1_a.875.875.2	ABCBA_HUMAN	1190.6	2	R.SVTENLSDGLR.A	1.4409	0.0482	176.6	121	39041
13_1_a.875.875.3	RB6I2_HUMAN	1782.97	3	K.LKLYIGHLTTLCHDR.D	1.3093	0.0376	159.9	236	17/56
13_1_a.876.876.3	H6ST2_HUMAN	1057.56	3	R.GAPVRTTCPR.R	1.4046	0.0088	185.8	76	13485
13_1_a.876.876.2	Q6PIN8	705.389	2	K.KTNTNK.I	1.606	0.019	326.5	3	38939
13_1_a.878.878.3	ITIH2_HUMAN	1218.63	3	K.EMSFSVLLHR.V	1.516	0.0278	289	25	16/36	2
13_1_a.878.878.2	Q4U1Z6	812.488	2	R.KIPEPTK.V	1.7293	0.0609	161.8	223	38941	2
13_1_a.879.879.2	PAIRB_HUMAN	1112.54	2	R.SSFSHYSGLK.H	1.8994	0.1419	298.2	7	39069
13_1_a.879.879.3	CDKL5_HUMAN	1665.86	3	K.ENRHLYNDPVPRR.V	1.7107	0.0027	182.5	180	15/48
13_1_a.880.880.2	RPB1_HUMAN	938.451	2	R.RMAEEFR.L	1.4046	0.1056	254.1	23	38972
13_1_a.880.880.3	AURKB_HUMAN	1406.82	3	R.RIYLILEYAPR.G	1.5711	0.0309	247.3	191	17/40
13_1_a.882.882.3	Q9BVC5	1067.6	3	K.KREQHEIK.N	1.6889	0.1153	210.9	121	39079
13_1_a.882.882.2	CO4A6_HUMAN	712.472	2	K.KGLPGLK.G	1.4437	0.012	116.7	231	38941	1
13_1_a.883.883.2	Q8N5E0	744.447	2	K.GVLSRGR.V	1.4118	0.0581	379.8	11	38972	1
13_1_a.883.883.3	Q8NEF9	1117.61	3	R.RNFKEQAPK.T	1.2213	0.0005	194.9	573	14/32
13_1_a.887.887.3	GRAP2_HUMAN	1590.91	3	R.TNSISRQKQIFLR.D	2.7207	0.1847	283.9	58	19/48
13_1_a.887.887.2	RRFM_HUMAN	1060.59	2	K.AKGKGQSQTR.V	1.9213	0.0194	175.9	255	39039
13_1_a.888.888.3	Q86W11	1653.85	3	K.TFRHRSGLMQHQR.T	1.579	0.0404	306.1	150	16/48
13_1_a.888.888.2	CN155_HUMAN	1101.62	2	K.LGSVVLEGEAK.F	2.0172	0.1279	546.5	21	13/20
13_1_a.890.890.1	IFT80_HUMAN	503.319	1	K.SLGVK.K	1.1423	0.0054	93.5	64	38845	1
13_1_a.891.891.2	DESP_HUMAN	1094.53	2	K.ACGSEIMQKK.Q	2.0383	0.0068	231.6	155	39008
13_1_a.891.891.3	GPA33_HUMAN	1639.77	3	K.SVTLPCTYHTSTSSR.E	1.7806	0.0034	187.5	350	15/56
13_1_a.893.893.2	MYO1F_HUMAN	876.396	2	K.EGWGGGGTR.S	1.4928	0.0829	199	48	39006	1
13_1_a.893.893.3	Q8NFP3	1316.68	3	R.EMPRIYPGPTR.L	1.5527	0	158.9	274	14/40
13_1_a.894.894.2	K0853_HUMAN	761.452	2	R.KSSKSPK.R	1.6885	0.0002	262.2	244	38972
13_1_a.894.894.3	Q6PD65	1143.58	3	R.CCIRALAEHK.K	1.2893	0.0096	141.2	653	13455	1
13_1_a.895.895.3	POSTN_HUMAN	1087.64	3	K.KLLQEEVTK.V	1.3376	0.0176	150.3	188	11994	2
13_1_a.895.895.2	RPC7_HUMAN	725.467	2	K.KAGPKPK.K	1.2894	0.0421	235.9	6	38972
13_1_a.896.896.3	Q15111	1410.84	3	K.QLNPTLKEAKIR.L	1.9276	0.0999	224.1	75	15/44
13_1_a.896.896.2	Q8WZ74	940.51	2	K.SSSPQLPPK.P	1.6493	0.0114	287.1	42	39006
13_1_a.898.898.2	INADL_HUMAN	1043.54	2	K.QVLEDSPAGK.T	1.5503	0.0554	176.4	205	39039
13_1_a.898.898.3	NKTR_HUMAN	1565.74	3	K.WSKGDKLSDPCSSR.W	1.688	0.0702	197.9	141	20/52
13_1_a.899.899.2	Q9NQW6	809.415	2	R.FKETER.P	1.4971	0.0113	122.6	219	38908
13_1_a.899.899.3	RIF1_HUMAN	1214.55	3	R.EGTFSKSDSEK.I	1.9414	0.1194	190.7	372	14/40
13_1_a.900.900.3	DNMT1_HUMAN	1661.74	3	K.EPVDEDLYPEHYR.K	2.0757	0.0086	423.5	7	24/48
13_1_a.900.900.2	DRIM_HUMAN	1107.66	2	R.YFPLLAKQK.P	1.6838	0.0411	147.1	148	39006
13_1_a.901.901.3	K1472_HUMAN	1634.77	3	R.KDDTGCPSSQSVSPVK.T	1.4499	0.0375	368.2	10	20/60
13_1_a.901.901.2	Q5BKT3	1089.59	2	R.GGGSVSARRSR.D	1.5546	0.0447	238.4	218	39041
13_1_a.903.903.2	ABCF1_HUMAN	1087.59	2	R.ATGAAAAEAKAR.R	1.7249	0.0218	174.2	288	13/22	1
13_1_a.903.903.3	Q58FF8	1628.81	3	K.EGLELPEDGEEKKR.M	1.9502	0.1327	406.1	6	22/52
13_1_a.904.904.3	EGFL3_HUMAN	1472.64	3	R.DGSCSCKAGFRGER.C	1.8476	0.0463	514.1	8	23/52
13_1_a.904.904.2	LAM1_HUMAN	982.47	2	R.EQHDAQVR.L	1.5162	0.0133	360	26	39004
13_1_a.906.906.2	LBXCO_HUMAN	764.441	2	R.LGPPPAGR.P	1.4413	0.0064	173.8	84	38943
13_1_a.906.906.3	Q6V704	1147.61	3	R.VVMNSAQASIK.Q	1.4088	0.0615	238.7	27	16/40	2
13_1_a.907.907.3	Q6ZTN8	1487.77	3	R.PHLPSGGSGAGVAPQR.L	2.5914	0.0442	999.9	1	28/60
13_1_a.907.907.2	COPD_HUMAN	990.515	2	R.EAKAEMRR.K	1.9982	0.0314	764	5	13/14	2
13_1_a.908.908.1	RED_HUMAN	505.262	1	K.SAAEK.R	1.3732	0.045	199.7	1	38906	2
13_1_a.909.909.2	TB182_HUMAN	904.485	2	K.ESAVQRSK.S	2.0278	0.1377	294	5	39035	1
13_1_a.909.909.3	KHK_HUMAN	1357.69	3	K.HLGFQSAEEALR.G	2.0807	0.2267	334	10	19/44
13_1_a.910.910.2	DHX37_HUMAN	883.529	2	R.KVCKIHR.M	1.5469	0.0312	133.9	335	38910
13_1_a.910.910.3	GALGT_HUMAN	1325.6	3	R.YPGSLDESQMAK.H	1.4965	0.1059	401.1	9	21/44
13_1_a.911.911.2	ZN451_HUMAN	1059.55	2	K.QQKEEKNR.A	1.8809	0.0587	453.6	4	39004
13_1_a.911.911.3	FBX11_HUMAN	1589.78	3	K.IHDGQHGGIYVHEK.G	1.8708	0.076	465.2	24	21/52
13_1_a.912.912.2	Q5H8Y9	1159.68	2	R.AGVTVLKTAGSR.C	1.7278	0.0268	166	326	38982
13_1_a.912.912.3	Q53TC9	1738.92	3	K.PIVKPTAGAGPQETNMK.E	1.6343	0.0252	264.9	111	19/64	1
13_1_a.914.914.3	Q96HJ3	1095.65	3	R.KIIAEEKHK.E	1.6878	0.0387	207.8	64	13/32	1
13_1_a.914.914.2	Q5T3W0	730.409	2	R.KAGETPK.I	1.8607	0.0173	220.7	69	38941	1
13_1_a.915.915.2	RENT1_HUMAN	1074.6	2	K.ADSVVVLLCR.Q	1.8169	0.0416	355.6	22	13/18
13_1_a.915.915.3	KTN1_HUMAN	1613.94	3	K.IKSVEELLEAELLK.V	1.6246	0.0479	383	14	20/52
13_1_a.916.916.2	K0553_HUMAN	922.448	2	K.SSKAESGEK.S	1.7513	0.0892	277.4	58	39067
13_1_a.916.916.3	TAP1_HUMAN	1385.68	3	R.EGGTHQQLMEKK.G	1.818	0.0015	402.7	20	20/44	1
13_1_a.918.918.1	SPCS1_HUMAN	586.331	1	K.KPGER.K	1.3328	0.0286	83.6	59	38876	1
13_1_a.919.919.3	Q8IX03	1272.76	3	K.ALTERLKLNSK.R	1.9735	0.1555	269.9	175	14/40
13_1_a.919.919.2	Q9C098	847.416	2	R.EATLEER.H	1.9505	0.0209	193.2	684	38941
13_1_a.920.920.2	PAWR_HUMAN	1027.6	2	R.QENLRLVR.L	1.6459	0.0248	225.4	196	39035
13_1_a.920.920.3	KSR1_HUMAN	1542.74	3	R.TESVPSDINNPVDR.A	1.6597	0.0479	211.7	333	18/52
13_1_a.926.926.2	CASL_HUMAN	1201.63	2	K.GSRDLVDGINR.L	1.3722	0.106	175.1	242	39041
13_1_a.926.926.3	RYR2_HUMAN	1798.85	3	R.TERTREGDSMALYNR.T	1.7527	0.0412	489.4	9	22/56
13_1_a.927.927.2	Q6ZUN0	756.415	2	R.GAWAVPR.V	1.8388	0.0541	191.1	195	38941
13_1_a.927.927.3	RM13_HUMAN	1136.65	3	R.QVTAAQLHLR.D	1.4178	0.1699	172.5	82	13485
13_1_a.928.928.2	Q6PD71	1125.52	2	R.MGAGMGFGLER.M	2.1899	0.2065	183.2	82	39071	1
13_1_a.928.928.3	LRMP_HUMAN	1686.86	3	R.LSLGFKCDWFTLEK.R	2.2037	0.025	143.7	399	17/52
13_1_a.932.932.2	Q5VV66	902.469	2	K.ERAIEER.R	1.5269	0.008	266.2	153	38941	1
13_1_a.932.932.3	Q9P0F8	1350.6	3	R.PGDSMATNNSTQK.V	1.8501	0.0925	461.3	31	20/48
13_1_a.933.933.2	TSC1_HUMAN	1121.54	2	R.KEERMDSAR.P	1.8455	0.0048	399.3	2	13/16
13_1_a.933.933.3	DUS5_HUMAN	1682.9	3	R.EKGGKVLVHCEAGISR.S	2.1044	0.07	167.7	159	18/60	1
13_1_a.935.935.3	KV1Y_HUMAN	1674.94	3	K.VLIYGASILETGVPSR.F	1.7232	0.0107	173.4	538	19/60
13_1_a.935.935.2	Q5RHP9	1115.65	2	K.LETLARKER.I	1.7628	0.0404	190.2	234	39037
13_1_a.936.936.3	Q86Y26	1648.74	3	R.GTPMAQSYDQNPSPR.A	1.9934	0.0566	336.2	35	21/56
13_1_a.936.936.2	Q8IYA6	1099.63	2	R.PPMELKTKR.K	1.7163	0.0289	256.6	43	39006
13_1_a.939.939.3	Q8N8U7	1066.65	3	R.KRLLAFYR.E	1.7173	0.0224	129.7	269	39079	1
13_1_a.939.939.2	TR10B_HUMAN	710.406	2	R.GARPGPR.V	1.4249	0.0962	193.9	7	38941	1
13_1_a.940.940.1	Q9H6J3	610.283	1	R.EGGYGK.T	1.1315	0.0189	160.3	11	38908
13_1_a.941.941.3	O43352	1600.89	3	K.KEIDPLELDFLLR.F	1.9122	0.0379	267.4	31	18/48
13_1_a.941.941.2	LKHA4_HUMAN	1067.66	2	R.KIYKFIQK.V	1.851	0.0485	240.6	52	39004	1
13_1_a.942.942.1	MGR1_HUMAN	572.279	1	K.GDAPGR.Y	1.1876	0.0109	98.6	69	38878	1
13_1_a.943.943.3	UT14A_HUMAN	1673.89	3	R.SSSRSDLSVIQRNPK.R	1.7154	0.1171	193.6	179	20/56
13_1_a.943.943.2	Q8N1I6	1114.66	2	K.AVVSLKAPSSR.L	1.8037	0.0546	197	107	13/20
13_1_a.946.946.1	ATP4A_HUMAN	503.257	1	K.AGGGGGK.R	1.0848	0.0118	100.4	38	38910
13_1_a.947.947.2	Q9BVF7	715.453	2	R.KVLMPK.L	1.4496	0.0012	196.4	210	38908	1
13_1_a.947.947.3	MGA_HUMAN	1073.61	3	K.KNPFGIEIR.R	2.1805	0.0754	529.3	1	17/32
13_1_a.949.949.2	ZN510_HUMAN	735.382	2	R.KNCDKK.T	1.4638	0.0035	99.8	391	38878
13_1_a.949.949.3	Q8TD55	1103.68	3	R.RPPTRVHLK.E	1.3741	0.0431	136.4	139	11963
13_1_a.950.950.3	SMOO_HUMAN	1321.67	3	R.STSFGVPNANSIK.Q	1.6275	0.1546	368.4	29	20/48	2
13_1_a.950.950.2	DNMT1_HUMAN	880.511	2	K.KHRSQPK.D	1.6622	0.1955	192.8	176	38941
13_1_a.951.951.2	Q96BF5	1016.53	2	R.WALRDEAR.L	2.0518	0.0818	352.1	40	39035
13_1_a.951.951.3	MIB2_HUMAN	1522.78	3	R.SRAARPTTDPSAHR.S	1.6676	0.0462	497.3	4	23/52
13_1_a.952.952.3	Q3KQW1	1192.64	3	K.QCALKNTSLSK.F	1.6342	0.0119	279.4	24	16/40
13_1_a.952.952.2	I13R2_HUMAN	795.355	2	R.ESSCEIK.L	1.3706	0.0674	168.3	144	38910
13_1_a.954.954.3	Q8NEY4	1164.63	3	K.LDTFAESLIR.R	1.7402	0.0274	189.9	312	14/36
13_1_a.954.954.2	SERF1_HUMAN	776.445	2	R.QKNMKK.T	1.9516	0.0758	276.8	62	38939	1
13_1_a.955.956.1	ANR12_HUMAN	518.257	1	K.EAGNK.K	1.1853	0.0245	51.6	21	38845
13_1_a.958.958.2	Q569J0	845.473	2	K.ENKVVEK.A	1.4454	0.0361	473.7	23	39002	1
13_1_a.958.958.3	Q68CZ3	1268.65	3	K.YTGKCVFSHVK.K	1.0513	0.0223	113.2	912	13/40
13_1_a.959.959.1	CF152_HUMAN	532.273	1	K.SSPNK.E	1.2281	0.0126	28.3	244	38784	1
13_1_a.960.960.3	ZN141_HUMAN	1127.62	3	K.EPYNVKIHK.I	1.9871	0.0349	208.4	354	13/32
13_1_a.960.960.2	NAC1_HUMAN	752.405	2	K.QKHPDK.E	1.7742	0.0778	206.2	90	38908	2
13_1_a.962.962.2	TPM1_HUMAN	989.49	2	R.AEQAEADKK.A	2.3535	0.1516	872.9	18	13/16	7
13_1_a.962.962.3	NIDO_HUMAN	1485.76	3	R.AECLNPSQPSRRK.A	1.7563	0.0566	768	8	23/48	1
13_1_a.964.964.2	NOLA2_HUMAN	701.467	2	K.KAVKQK.Q	1.8358	0.0119	207	144	38939
13_1_a.964.964.3	Q6IEE8	1053.56	3	K.IFYLSPEGK.T	1.6464	0.0144	177.8	214	13/32
13_1_a.965.965.2	TXND2_HUMAN	987.547	2	K.SSEKAIQPK.E	1.7222	0.0786	323.7	51	39037
13_1_a.965.965.3	ARHGC_HUMAN	1482.88	3	R.WALDALRNLGLLK.Q	1.4848	0.0073	341.5	35	18/48
13_1_a.966.966.3	PROX1_HUMAN	1101.54	3	R.EMAPQSVSPR.E	1.3769	0.0076	237.8	73	14/36
13_1_a.966.966.2	CT006_HUMAN	733.457	2	K.KTQTKK.E	1.5868	0.0546	289.8	10	38939
13_1_a.967.967.2	SAMD9_HUMAN	843.468	2	K.KEREGPK.L	1.7752	0.0176	236	54	38972
13_1_a.967.967.3	ZNF7_HUMAN	1267.64	3	K.ASDSPSLVAHQR.I	1.4383	0.0203	257.5	28	18/44
13_1_a.970.970.2	Q6DJT9	919.521	2	K.SSGGVKEKK.H	1.6394	0.0147	399.4	95	39037
13_1_a.970.970.3	UHRF1_HUMAN	1378.74	3	R.PASGSPFQLFLSK.V	2.2452	0.0329	590.4	5	21/48
13_1_a.972.972.2	NEBU_HUMAN	817.405	2	K.AGDALNEK.K	1.6592	0.044	436.5	12	39035
13_1_a.972.972.3	Q8N9R6	1225.69	3	R.QNKPSSVIQPK.R	1.8798	0.0755	516.6	10	21/40
13_1_a.973.973.2	CO1A2_HUMAN	784.442	2	K.EGLRGPR.G	1.5595	0.0324	126	362	38941	1
13_1_a.973.973.3	CO1A2_HUMAN	1177.57	3	K.AGEDGHPGKPGR.P	1.4566	0.0534	173.7	131	14/44	1
13_1_a.974.974.2	PTC1_HUMAN	1150.65	2	K.LQSGTAYLLGK.P	1.2015	0.0085	132.5	119	38980	2
13_1_a.974.974.3	FGFR1_HUMAN	1726.91	3	K.KSDFHSQMAVHKLAK.S	1.8146	0.0137	436.2	2	24/56
13_1_a.975.975.1	PRP8_HUMAN	668.409	1	R.PPKAQK.K	1.6839	0.0542	140.8	16	38908
13_1_a.976.976.3	SYCP2_HUMAN	1691.86	3	R.SSLEKGQPSSKMTPSK.N	1.8601	0.0556	332.8	12	23/60
13_1_a.976.976.2	Q6PIH0	1126.62	2	K.ADLTVQPVAGR.V	1.6648	0.065	356.5	4	15/20
13_1_a.980.980.2	CO1A1_HUMAN	948.402	2	K.GETGEQGDR.G	2.3413	0.3032	410	13	13/16
13_1_a.980.980.3	RGS3_HUMAN	1421.7	3	K.RVCWCLSENIAK.Q	1.9578	0.0875	266.3	78	18/44	1
13_1_a.981.981.1	Q8N5E1	570.325	1	R.KPTQP.-	1.2894	0.0571	230.3	7	38876
13_1_a.982.982.1	ASSY_HUMAN	627.419	1	K.KGVPVK.V	1.0266	0.1598	164.7	1	38908
13_1_a.984.984.3	ICT1_HUMAN	1304.71	3	R.LGELILTSESSR.Y	1.7709	0.057	189.9	200	15/44
13_1_a.984.984.2	MT3_HUMAN	869.368	2	K.CAKDCVCK.G	1.641	0.04	164.8	306	38912
13_1_a.986.986.1	HORN_HUMAN	591.284	1	R.QGSGSR.Q	1.1567	0.095	47.2	12	38878
13_1_a.987.987.2	Q9NS87	917.505	2	R.EKEKAGAGK.S	1.6675	0.0643	306.5	119	39037
13_1_a.987.987.3	ROA1_HUMAN	1375.63	3	R.SSGPYGGGGQYFAK.P	1.5874	0.0046	340.7	19	20/52	3
13_1_a.988.988.3	Q7Z3S7	1082.53	3	R.EVSFADRMK.W	2.3405	0.2242	347.2	34	16/32	1
13_1_a.988.988.2	CP39A_HUMAN	721.345	2	K.FQCPAR.W	1.9662	0.004	328.1	55	38939
13_1_a.990.990.3	Q6ZUS5	1572.9	3	K.TALLQKENIQSSLK.R	1.7285	0.033	158	89	17/52
13_1_a.990.990.2	ADCY3_HUMAN	1048.5	2	K.EDKSERER.W	2.0386	0.0764	373.5	7	39035
13_1_a.991.991.3	MATR3_HUMAN	1108.73	3	K.KLVLRIPNR.G	1.5276	0.0544	134.8	481	11994
13_1_a.991.991.2	ZHX3_HUMAN	739.482	2	K.KIHTLK.E	1.6626	0.0705	262.2	24	38939	3
13_1_a.992.992.2	Q6ZNC3	1207.58	2	R.DKEGHYTMVK.G	1.7736	0.1197	263.2	43	39039
13_1_a.992.992.3	BCOR_HUMAN	1812.88	3	R.PASASPAPNANADGTKTSR.S	1.9727	0.0447	330.8	90	24/72
13_1_a.996.996.3	Q96CS4	1291.6	3	K.KPYPCPDCGRR.F	1.7528	0.006	139.1	831	13/40
13_1_a.996.996.2	Q9UG01	860.495	2	R.EATKKGAR.G	1.9829	0.0108	285.4	141	39035
13_1_a.997.997.3	Q5JQP7	1152.73	3	K.PRLVQLIWK.P	1.5311	0.0054	243.6	16	15/32
13_1_a.997.997.2	YL1_HUMAN	767.489	2	K.KKQVHK.K	1.6075	0.0147	137.9	165	38878
13_1_a.998.998.2	Q12839	719.368	2	R.ELGSSAR.F	1.9418	0.0097	300.2	79	39002	2
13_1_a.998.998.3	Q9UNM7	1078.58	3	R.QLTFEEIAK.S	2.1793	0.1051	251.2	257	13/32	1
13_1_a.999.999.2	CJ111_HUMAN	1046.52	2	R.ENQDKREK.E	1.7582	0.009	191.3	129	38943
13_1_a.999.999.3	Q86T29	1569.92	3	K.AFSQKLKLITHQR.A	1.7293	0.1523	224.9	16	15/48
13_1_a.1000.1000.3	Q5TH69	1181.65	3	K.EASGSKYKAIK.E	1.8175	0.0085	212.1	140	15/40
13_1_a.1000.1000.2	BMPER_HUMAN	788.474	2	K.EVTRKR.E	1.6277	0.0027	279.3	72	38970
13_1_a.1002.1002.2	MYH9_HUMAN	747.352	2	K.QVEDEK.N	2.0297	0.0127	359.9	16	38970
13_1_a.1002.1002.3	Q5T5X7	1121.59	3	R.KVHVPGPECR.D	1.7731	0.0905	308.4	47	16/36
13_1_a.1003.1003.1	MDP1_HUMAN	602.326	1	K.EVAGAR.A	1.3047	0.0263	159.5	21	38908
13_1_a.1004.1004.3	Q5JZ84	1863.99	3	R.QGRGAVWGSVIYPSMKK.A	1.7131	0.0204	409.7	16	24/64
13_1_a.1004.1004.2	Q6WRI0	1241.61	2	R.LMETDFSGLTK.L	1.3859	0.0351	166	99	39010
13_1_a.1005.1005.2	FUT3_HUMAN	1232.69	2	R.LPPSPRPQGQR.W	1.4401	0.1171	281.3	20	39071
13_1_a.1005.1005.3	VTI1B_HUMAN	1848.02	3	K.LHREVRSTPLTATPGGR.G	1.8162	0.2038	219.6	275	18/64	1
13_1_a.1008.1008.1	CAD12_HUMAN	590.314	1	K.GEGTVK.Y	1.1651	0.0071	160.2	9	38908	1
13_1_a.1010.1010.1	NOTC1_HUMAN	503.257	1	K.NGANK.D	1.0031	0.0379	90.7	6	38845	2
13_1_a.1011.1011.1	CV106_HUMAN	517.334	1	K.VGTLK.R	1.4676	0	100.7	10	38906	2
13_1_a.1013.1013.2	CD2L7_HUMAN	1079.56	2	R.QRSVSPYSR.R	1.708	0.0103	146.5	95	38945
13_1_a.1013.1013.3	Q8NGU3	1619.8	3	R.WGAPGTCGITTTLWR.A	1.8441	0.0931	236.8	3	17/56
13_1_a.1015.1015.3	Q6ZNZ0	1548.82	3	R.AQGHGVGVVQMGPRR.L	2.1139	0.0769	318.1	42	23/56
13_1_a.1015.1015.2	RTEL1_HUMAN	1032.51	2	R.AQGELFPDR.A	1.9065	0.0474	311.2	15	39067
13_1_a.1016.1016.3	Q3YL75	1235.7	3	R.RHRIISPDNK.Y	1.7829	0.0663	241.8	225	15/36
13_1_a.1016.1016.2	Q8TEA7	823.504	2	K.KPLPSGPK.S	1.3714	0.0039	251.2	75	38974	1
13_1_a.1018.1018.2	Q8IY66	773.47	2	R.KAAPKMK.K	1.8813	0.0446	204.1	112	38941
13_1_a.1018.1018.3	Q5R3F8	1159.64	3	R.QLSADAAVTRK.T	1.7162	0.0146	186.3	345	15/40
13_1_a.1019.1019.2	NUP93_HUMAN	1070.55	2	R.QIYIYNEK.I	1.9353	0.0941	233.7	80	38974
13_1_a.1019.1019.3	PCDH9_HUMAN	1605.88	3	R.LDSAIAQELIYTIR.E	1.7676	0.0368	244.8	67	16/52	1
13_1_a.1020.1020.3	Q8N6W7	1443.71	3	K.FQASQPEPSDLPK.K	1.5767	0.0485	376.9	55	17/48	1
13_1_a.1020.1020.2	Q8IVM7	962.454	2	R.KENTGEER.E	1.8527	0.1433	204.1	195	38943
13_1_a.1021.1021.1	Q6ZMS7	629.325	1	K.EGQAPK.Q	1.1606	0.0211	189.6	22	38908
13_1_a.1022.1022.2	Q6AW97	907.438	2	R.FRQEGDR.R	1.5312	0.0495	176.8	138	38972	1
13_1_a.1022.1022.3	Q9Y4H3	1361.71	3	R.EWRKLTGMGGAR.G	1.3851	0.0041	189.2	399	15/44
13_1_a.1023.1023.1	Q8N913	613.367	1	R.GQALPK.H	1.2426	0.0829	94	66	38878
13_1_a.1024.1024.2	TTC9_HUMAN	851.426	2	K.KEGENFK.A	1.7367	0.022	208.9	192	38941
13_1_a.1024.1024.3	KCMA1_HUMAN	1276.61	3	K.EGDDAICLAELK.L	1.7414	0.0559	485.2	13	19/44	10
13_1_a.1026.1026.3	Q9P199	1330.78	3	R.LYIALQGGQVLR.I	1.5645	0.0085	545.6	8	21/44
13_1_a.1026.1026.2	PRLR_HUMAN	887.495	2	R.ENSGKPKK.P	1.8728	0.0129	316.4	65	39065
13_1_a.1028.1028.2	Q5JYT7	986.538	2	K.QAAQLGATAR.G	1.5046	0.0031	265.2	13	39069	2
13_1_a.1028.1028.3	JIP3_HUMAN	1480.74	3	R.QVREHVRNDDGR.L	1.4331	0.0752	152.4	114	15/44
13_1_a.1029.1029.3	ROCK1_HUMAN	1348.73	3	R.KNKNIDNFLSR.Y	1.6336	0.0521	213	19	16/40
13_1_a.1029.1029.2	Q569G9	898.51	2	R.GAGNGKGPLK.G	2.054	0.2478	374.2	1	13/18
13_1_a.1030.1030.1	GALT4_HUMAN	561.299	1	R.ELGSR.R	1.1485	0	76.1	24	38876	2
13_1_a.1032.1032.3	Q6Q8P7	1344.71	3	K.ELFWMLHLQK.E	1.676	0.0202	213.6	309	15/36	1
13_1_a.1032.1032.2	Q8WVK3	897.613	2	R.QLLIGLLK.S	1.47	0.0485	311.2	15	39035
13_1_a.1034.1034.3	O60780	1188.63	3	K.ERQTEELRK.Q	1.7284	0.045	429.8	34	17/32	1
13_1_a.1034.1034.2	CEZ2_HUMAN	792.4	2	R.EPQPGHK.V	1.4757	0.0261	212.8	41	38941
13_1_a.1035.1035.3	Q86XP1	1212.72	3	K.AVKPREIMLR.A	1.5052	0.0377	304	235	15/36	1
13_1_a.1035.1035.2	K0831_HUMAN	808.384	2	K.QEEFQK.E	1.2739	0	296.5	50	38939
13_1_a.1036.1036.3	BRE1A_HUMAN	1222.67	3	R.AVSQIVTVYDK.L	1.8839	0.0047	400.5	26	18/40
13_1_a.1036.1036.2	Q96FC6	817.489	2	R.KLTGDRK.W	1.808	0.0559	416.6	70	39002
13_1_a.1037.1037.3	Q71RE2	2203.17	3	K.FSQMLIVNEELQARLAQGR.S	1.7413	0.1383	236.2	138	19/72	1
13_1_a.1037.1037.2	REXO4_HUMAN	1467.75	2	K.YVKPTEPVTDYR.T	1.0042	0.0666	116.7	255	38951
13_1_a.1038.1038.3	BSSP4_HUMAN	1199.65	3	R.PGVYISLSAHR.S	1.6184	0.0271	165.6	156	13/40
13_1_a.1038.1038.2	FXR2_HUMAN	800.426	2	R.QSAPLER.T	1.9815	0.0561	233.3	74	38972
13_1_a.1039.1039.1	AT2B1_HUMAN	650.351	1	R.EAVFGK.N	1.1508	0.0504	174.6	1	38939
13_1_a.1040.1040.3	F16P1_HUMAN	2200.17	3	K.AGIAHLYGIAGSTNVTGDQVKK.L	1.3794	0.1004	351.8	7	25/84
13_1_a.1042.1042.2	ABCBA_HUMAN	1190.6	2	R.SVTENLSDGLR.A	2.2166	0.0097	748.4	10	15/20
13_1_a.1042.1042.3	Q86YR7	1785.08	3	R.IAVAFPGNLQLIFILR.P	1.969	0.0723	433.1	91	21/60
13_1_a.1043.1043.3	Q5JR12	1502.81	3	R.SAVAHLVSSGGAPPPR.P	1.5316	0.0615	228.1	43	19/60
13_1_a.1043.1043.2	Q6Y7W7	1000.59	2	R.EVELRAKR.E	1.4542	0.0055	142.3	437	38974
13_1_a.1044.1044.3	EVX2_HUMAN	1659.86	3	R.PLDTFRALSHPYSR.P	1.4927	0.0398	204.2	217	16/52
13_1_a.1044.1044.2	MMP14_HUMAN	1104.62	2	K.FGAEIKANVR.R	1.6412	0.0926	334.2	13	13/18
13_1_a.1045.1045.2	RFIP1_HUMAN	705.414	2	K.ETISKK.E	1.6176	0.0369	181.8	194	38878
13_1_a.1045.1045.3	RUSC2_HUMAN	1056.58	3	K.KTGGSGSPPLR.V	1.4277	0.0495	158.5	335	14916
13_1_a.1046.1046.1	ST14_HUMAN	600.346	1	R.KGGGGPK.D	1.1329	0.0066	162.8	15	38910
13_1_a.1047.1047.2	Q7L2J0	699.404	2	K.SSPLPAK.G	1.1958	0.018	298.7	11	38941
13_1_a.1047.1047.3	LPLC3_HUMAN	1050.64	3	K.SRAPAKVPPK.K	1.2548	0.0411	215.3	37	13485
13_1_a.1048.1048.3	AATF_HUMAN	1458.73	3	K.GGPEFSSALKNSHK.A	1.8537	0.0492	208.9	491	20/52
13_1_a.1048.1048.2	MYT1L_HUMAN	971.516	2	R.LEEQLSPR.S	1.6971	0.0326	327.3	30	39004
13_1_a.1050.1050.2	NXF5_HUMAN	744.364	2	R.AGPESQR.W	1.6254	0.0377	358.3	73	39002	2
13_1_a.1050.1050.3	Q4G0M8	1116.62	3	R.EPKSQKPFR.K	1.52	0.0041	222.1	606	13/32	3
13_1_a.1052.1052.2	YLPM1_HUMAN	1103.56	2	K.RDWEAIASR.M	1.9305	0.0366	297.1	59	39037
13_1_a.1052.1052.3	SORL_HUMAN	1654.98	3	R.HLHVVHTGKTSVVIK.W	1.4256	0.0008	254.3	78	15/56
13_1_a.1053.1053.3	CDC5L_HUMAN	1897.02	3	K.MKILLGGYQSRAMGLMK.Q	1.5216	0.1217	544.4	22	24/64
13_1_a.1053.1053.2	RIOK3_HUMAN	1264.73	2	K.GFIGKGKDITTK.H	1.3444	0.0032	245.5	119	39043
13_1_a.1054.1054.3	Q9H0D4	1780.82	3	K.SQGLHENNIPDNETGR.K	1.5936	0.021	397.4	101	21/60
13_1_a.1054.1054.2	BRE1A_HUMAN	1188.66	2	K.KSKAELEDLR.Q	1.7412	0.02	800.1	7	15/18
13_1_a.1055.1055.2	H11_HUMAN	771.484	2	K.KPAATRK.S	1.8308	0.0207	197.9	113	38941
13_1_a.1055.1055.3	Q6UXK6	1157.6	3	R.PRGCATGSRPR.D	1.6731	0.0045	213.4	392	15/40	1
13_1_a.1056.1056.3	Q8N360	1627.92	3	K.VRLDLFSCLLRHR.L	1.6044	0.0824	303.8	26	21/48	1
13_1_a.1056.1056.2	Q86TB3	1084.59	2	R.QPGMKGNPKK.P	1.6129	0.0561	89.8	720	38978
13_1_a.1058.1058.1	O75766	504.241	1	R.GGNEK.G	1.35	0.0236	127	9	38845	3
13_1_a.1059.1059.2	Q6MZM8	715.362	2	K.ESTPGPK.E	1.527	0.0356	264.1	18	38972	1
13_1_a.1059.1059.3	MGA_HUMAN	1073.61	3	K.KNPFGIEIR.R	1.9165	0.0128	661.2	1	18/32
13_1_a.1060.1060.3	Q5TEW3	1140.68	3	R.KSFIGVKFSK.E	1.6202	0.0577	152.4	675	13485
13_1_a.1060.1060.2	YTHD1_HUMAN	760.406	2	R.QSRNKQ.-	1.9229	0.0274	290.6	66	38939	1
13_1_a.1061.1061.2	Q9H967	840.505	2	R.QPPKSKR.K	1.8373	0.107	317.8	19	38972
13_1_a.1061.1061.3	Q96EX0	1262.76	3	R.APALSPTRPPKK.P	1.2603	0.005	214.4	165	15/44
13_1_a.1062.1062.3	RL7A_HUMAN	1220.66	3	R.RHWGGNVLGPK.S	1.7103	0.0224	151	422	15/40	1
13_1_a.1062.1062.2	Q5VYX6	813.556	2	K.KPSLLKK.P	1.7418	0.0976	226.9	59	38972
13_1_a.1063.1063.3	Q86XF2	1389.81	3	R.LGKALMGLQRFR.E	2.2165	0.0857	282.7	361	16/44	1
13_1_a.1063.1063.2	K0934_HUMAN	927.435	2	R.AVSTSFGCR.V	1.3878	0.0959	217.3	167	39006	1
13_1_a.1064.1064.1	HEM0_HUMAN	547.284	1	R.NSGAAK.F	1.346	0.058	166.8	3	38908	1
13_1_a.1066.1066.2	Q5BKT3	1089.59	2	R.GGGSVSARRSR.D	1.739	0.0929	270.3	92	39041
13_1_a.1066.1066.3	DLGP1_HUMAN	1635.75	3	R.ELCEENLNPNAHPR.P	1.8074	0.036	191.9	191	17/52
13_1_a.1067.1067.1	Q5D0D7	698.358	1	K.SEVAHR.F	1.3484	0.1248	120.4	71	38847	2
13_1_a.1068.1068.3	AFF1_HUMAN	1088.57	3	R.EPGLLPYGSR.D	1.2093	0.0652	93.2	688	13455	1
13_1_a.1068.1068.2	RPC7_HUMAN	725.467	2	K.KAGPKPK.K	1.5568	0.0956	147.5	23	38910
13_1_a.1069.1069.2	FLOT1_HUMAN	872.495	2	K.ELEARVR.K	1.7551	0.046	726.1	15	39033
13_1_a.1069.1069.3	Q59EN9	1310.74	3	R.GALWWVPPTKR.E	1.5792	0.0781	356.1	143	15/40
13_1_a.1070.1070.2	Q8IYM0	1210.79	2	K.VLPLSLIATKR.G	1.8968	0.0509	207.8	65	39010
13_1_a.1070.1070.3	EMIL1_HUMAN	1817.9	3	R.YRVAYKTVTDMEWR.C	1.4741	0.024	261.7	72	21/52
13_1_a.1071.1071.3	ZSWM2_HUMAN	1568.75	3	K.NSAVNGQAHQSVSNR.D	1.8876	0.1485	234.1	119	17/56
13_1_a.1071.1071.2	MLH3_HUMAN	1045.61	2	R.KESIICKPK.N	1.731	0.0276	372.9	57	39037
13_1_a.1072.1072.1	Q6RUV3	542.33	1	-.AGLGPK.K	1.0635	0.0129	177.2	1	38908
13_1_a.1074.1074.2	CU005_HUMAN	1093.52	2	K.FIDADVEER.H	1.951	0.0852	405.4	5	39006
13_1_a.1074.1074.3	MST4_HUMAN	1641.9	3	K.TSYLTELIDRFKR.W	2.0892	0.0413	380.4	65	18/48	2
13_1_a.1075.1075.3	CYLN2_HUMAN	1588.78	3	K.EKVDLSNQLEEER.R	2.1586	0.0741	240.6	254	15/48
13_1_a.1075.1075.2	Q6NXQ2	1059.59	2	R.KGAKNTDAVR.A	2.3303	0.0011	461.4	25	14/18
13_1_a.1077.1077.2	DLG4_HUMAN	1223.65	2	K.IIEGGAAHKDGR.L	1.5563	0.0828	137.5	203	39012	1
13_1_a.1077.1077.3	E41LA_HUMAN	1834.94	3	K.TLMGQIPSEAELNYLR.T	1.5703	0.0632	300.9	112	21/60
13_1_a.1078.1078.1	Q6ZS11	568.345	1	R.GPGLPK.K	1.1276	0.0853	77.9	52	38847
13_1_a.1079.1079.1	ASSY_HUMAN	627.419	1	K.KGVPVK.V	1.1941	0.1705	132.9	1	38878
13_1_a.1080.1080.3	AK1C2_HUMAN	1493.8	3	K.LWSNSHRPELVR.P	1.6223	0.0534	470.4	12	21/44	2
13_1_a.1080.1080.2	Q96HE9	996.574	2	R.KFQLAHPR.S	1.8855	0.1752	357.4	5	39035
13_1_a.1084.1084.2	Q6PI77	729.462	2	K.KAAIQAK.A	1.7542	0.0451	790.8	1	39033	1
13_1_a.1084.1084.3	TAD3L_HUMAN	1093.68	3	K.KHDLLRLAK.E	1.658	0.1573	233.7	256	11994
13_1_a.1085.1085.1	Q53SK1	644.361	1	K.SAPELK.T	1.0095	0	135.2	6	38878	2
13_1_a.1086.1086.3	Q76B58	1327.82	3	K.IVHKLFSLSKR.C	1.5342	0.0881	210.2	186	15/40
13_1_a.1086.1086.2	Q7Z2X3	885.515	2	K.KKVPEER.K	1.8163	0.1886	294.3	15	38972	1
13_1_a.1090.1090.1	5NT1B_HUMAN	520.273	1	R.NTSAK.L	1.092	0.0321	155.5	1	38876
13_1_a.1091.1091.1	Q8IXT2	588.299	1	R.GEASPK.A	1.0973	0.0341	150.2	20	38908	1
13_1_a.1094.1094.3	HIAT1_HUMAN	1859.93	3	R.TADADQQGVVQGMITGIR.G	1.8087	0.0225	558.3	3	28/68
13_1_a.1094.1094.2	SYAP1_HUMAN	1240.65	2	R.EQDLPLAEAVR.P	1.4437	0.0863	249.5	25	13/20	1
13_1_a.1095.1095.1	ANK2_HUMAN	647.299	1	K.EDAAGGK.E	1.3187	0.1205	112	58	38910
13_1_a.1099.1099.2	Q7RTP3	1125.51	2	K.EMGSQPHSPR.V	2.0406	0.0311	143.4	414	39039	1
13_1_a.1099.1099.3	LMO4_HUMAN	1688.79	3	R.FLLYAMDSYWHSR.C	2.0406	0.0463	208.2	217	18/48
13_1_a.1100.1100.1	MYP2_HUMAN	658.425	1	R.KLVNGK.M	1.1518	0.0079	42.8	162	38878
13_1_a.1101.1101.1	CN115_HUMAN	597.324	1	R.YSVTK.S	1.062	0.0017	80.5	7	38845	2
13_1_a.1102.1102.2	Q4F966	876.465	2	R.SRGRGSEK.R	1.2804	0.0215	154.1	243	38943	4
13_1_a.1102.1102.3	Q8NCC7	1314.61	3	R.YFTWDEVAQR.S	1.8492	0.165	127.3	861	13485
13_1_a.1103.1103.2	HGFA_HUMAN	1101.48	2	R.YEYLEGGDR.W	1.8165	0.0946	620.4	4	13/16
13_1_a.1103.1103.3	RILP_HUMAN	1651.96	3	R.RFGPEAAAGLVPLVVR.A	1.4982	0.0873	322.6	20	21/60
13_1_a.1104.1104.1	TOP2A_HUMAN	617.373	1	K.KVTGGR.N	1.3254	0.0176	187.4	11	38939	1
13_1_a.1106.1106.2	GPR62_HUMAN	713.376	2	R.LGPAPCR.A	1.4986	0.181	255.6	2	38972
13_1_a.1106.1106.3	SYP2L_HUMAN	1068.69	3	R.KPLQVSKIR.R	1.4947	0.0243	198	46	14/32
13_1_a.1107.1107.2	Q7Z3J9	828.421	2	K.QPEEGLR.L	1.4408	0.0116	268.2	73	38972	1
13_1_a.1107.1107.3	AKP8L_HUMAN	1244.58	3	R.KQGGSPDEPDSK.A	1.5909	0.0638	314.3	30	16/44	1
13_1_a.1108.1108.2	SYC_HUMAN	803.389	2	K.QEQEAAK.L	1.9175	0.012	387.9	10	39002	1
13_1_a.1108.1108.3	Q674X4	1205.63	3	R.EEQLRDFIR.N	2.0693	0.0174	312.9	25	14/32	6
13_1_a.1109.1109.2	FA43B_HUMAN	1222.71	2	K.MKLTLGPHGIR.M	1.7149	0.1941	338.5	9	39071
13_1_a.1109.1109.3	ETFB_HUMAN	1831.85	3	K.HSMNPFCEIAVEEAVR.L	1.4565	0.1431	346	37	23/60	1
13_1_a.1111.1111.2	Q8N5H7	828.421	2	R.QAQEAGPK.P	1.6538	0.0335	220.4	143	39004
13_1_a.1111.1111.3	BRCA2_HUMAN	1240.69	3	K.QVSILESSLHK.V	1.9855	0.0871	287	41	17/40
13_1_a.1112.1112.2	Q5TCD5	1029.5	2	R.KDDQGNPQK.V	1.7625	0.0036	201.1	567	39006	3
13_1_a.1112.1112.3	Q6ZTL4	1543.77	3	K.GGSQPGCWGARGRVR.T	2.1307	0.1409	263.6	316	19/56
13_1_a.1115.1115.1	BAZ1B_HUMAN	503.294	1	K.RAEK.Q	1.0745	0.0009	69.3	99	38813	34
13_1_a.1116.1116.2	NUMBL_HUMAN	1202.65	2	K.SVLWVSADGLR.V	1.8973	0.0398	472.2	73	13/20
13_1_a.1116.1116.3	TAF7_HUMAN	1803.9	3	K.QIDNMKGKLQETQDR.A	2.3723	0.0676	626.9	56	20/56
13_1_a.1117.1117.3	ANF_HUMAN	1900.86	3	R.ANPMYNAVSNADLMDFK.N	1.9967	0.0785	344.1	29	20/64
13_1_a.1117.1117.2	Q59EP8	1268.51	2	K.EMSEYYFDGK.G	1.3131	0.0911	383.7	2	39069	2
13_1_a.1120.1120.3	Q7Z436	1604.76	3	K.PGDEGKVEQGMKDSK.S	2.0641	0.1127	379	26	22/56	5
13_1_a.1120.1120.2	Q49MG5	1068.58	2	K.KMEYLKEK.N	2.0082	0.0118	502.2	13	39035
13_1_a.1122.1122.1	ITPR3_HUMAN	518.257	1	R.NAGEK.I	1.1669	0.0247	70.3	22	38845
13_1_a.1125.1125.3	CING_HUMAN	1167.51	3	R.EGSSESETSVR.R	1.8133	0.0153	264.6	40	16/40
13_1_a.1125.1125.2	ARMX5_HUMAN	778.351	2	K.AGDGAMTR.T	1.5012	0.0112	237	125	38974
13_1_a.1126.1126.3	Q8IW04	1259.68	3	-.MLVPGSTRPSSK.K	1.7361	0.022	182.5	474	15/44
13_1_a.1126.1126.2	SC15B_HUMAN	839.473	2	R.KLQHEGK.E	1.4367	0.0079	178.2	155	38972
13_1_a.1127.1127.2	FMR1_HUMAN	1192.62	2	R.ESFLRRGDGR.R	2.2118	0.1614	374.1	1	14/18	1
13_1_a.1127.1127.3	RYR3_HUMAN	1790.93	3	K.VLDILCSLCLCNGVAVR.A	1.8507	0.0125	170.3	339	19/64
13_1_a.1128.1128.1	UGGG1_HUMAN	558.288	1	R.EGPQK.R	1.0654	0.0383	74.3	52	38845
13_1_a.1130.1130.3	HSP47_HUMAN	1268.68	3	K.KPVEAAAPGTAEK.L	1.0636	0.0957	204.5	55	16/48
13_1_a.1130.1130.2	Q8NCI1	845.426	2	R.NEGAWLR.E	1.6827	0.1252	296.4	64	38972
13_1_a.1132.1132.3	Q6ZUH4	1218.8	3	K.VILLKAHVGLR.P	1.4986	0.0359	241.4	83	15/40
13_1_a.1132.1132.2	PTE2A_HUMAN	812.474	2	R.EPVRVGR.V	1.5566	0.0508	303.9	12	39002
13_1_a.1133.1133.3	EDF1_HUMAN	1165.52	3	R.ETEELHHDR.V	1.9118	0.0025	257	177	14/32
13_1_a.1133.1133.2	GEMI4_HUMAN	776.488	2	R.KTSTVLK.N	1.9886	0.037	313.5	52	39002
13_1_a.1134.1134.3	ITA11_HUMAN	1486.7	3	R.YTPRAHLDEGGDR.F	1.4677	0.0555	376.2	2	21/48
13_1_a.1134.1134.2	GMCLL_HUMAN	992.389	2	R.YCDPDSHR.E	1.341	0.0443	267.7	6	39004
13_1_a.1135.1135.2	AASS_HUMAN	1174.56	2	R.EDVNAWERR.A	1.717	0.0194	152.4	299	39006
13_1_a.1135.1135.3	RW1_HUMAN	1760.01	3	K.LSLQTLNADIFLKQR.Q	1.7218	0.0009	163.5	367	18/56
13_1_a.1136.1136.3	Q9H9B0	1599.87	3	K.KGDIHGAFLIMLER.L	1.8514	0.1186	416.4	7	20/52
13_1_a.1136.1136.2	MPRI_HUMAN	1067.52	2	R.GAGAESSHPVR.N	1.6523	0.0063	245.2	79	39041
13_1_a.1138.1138.2	H14_HUMAN	784.468	2	K.KPAAAAGAK.K	1.9217	0.0699	326.6	4	13/16
13_1_a.1138.1138.3	Q5VT97	1177.63	3	K.KELREAFER.D	1.0601	0.0872	141.3	79	13/32
13_1_a.1139.1139.3	G3ST2_HUMAN	1115.62	3	R.SVARLSPETR.E	1.6069	0.0397	182.4	173	13/36
13_1_a.1139.1139.2	CSKP_HUMAN	744.389	2	K.ENSAPVK.L	1.5587	0.0136	137.8	504	38941	5
13_1_a.1140.1140.3	Q71H61	1740.94	3	R.GGSLETPSKRSAQLGPR.S	1.3673	0.0891	455.7	7	22/64
13_1_a.1140.1140.2	GATM_HUMAN	1159.59	2	R.GAEAVHYIGSR.L	1.5966	0.0055	543.2	1	13/20
13_1_a.1141.1141.2	Q6PCB5	958.532	2	R.TEEKKAPR.R	1.5984	0.1895	415.2	4	39035
13_1_a.1141.1141.3	CNOT6_HUMAN	1439.86	3	K.DNIGVAVLLELRK.E	1.4903	0.0442	193.4	726	16/48
13_1_a.1142.1142.3	Q499G5	1320.79	3	R.ALLAGGGGPPAKRR.L	1.7581	0.1096	290.5	53	18/52
13_1_a.1142.1142.2	FA20A_HUMAN	881.532	2	R.RVPPTVGR.I	1.1974	0.0001	348.8	4	39035	1
13_1_a.1143.1143.2	MBD1_HUMAN	1056.54	2	R.QVGPQSGEVR.K	1.6681	0.0444	450.9	2	14/18	1
13_1_a.1143.1143.3	CT032_HUMAN	1584.95	3	K.TLSFPKQAILTLPR.P	1.9075	0.0067	277.1	107	19/52
13_1_a.1144.1144.3	GGA1_HUMAN	1134.57	3	R.FHDEVGKFR.F	1.6216	0.0178	145.9	36	13/32	2
13_1_a.1144.1144.2	Q5T157	755.416	2	K.KPGNPSR.A	1.5165	0.0032	276.3	1	39002
13_1_a.1148.1148.1	Q8N5E1	570.325	1	R.KPTQP.-	1.2136	0.1033	97.7	22	38845
13_1_a.1150.1150.2	CALD1_HUMAN	1111.57	2	K.TPDGNKSPAPK.P	1.6412	0.0582	267.6	27	13/20
13_1_a.1150.1150.3	Q4VXG4	1666.9	3	R.LQKLSIEDSNYTKK.I	1.7895	0.0601	392.7	9	21/52
13_1_a.1151.1151.3	Q8NCK9	1273.67	3	R.ATAVDPTCARLR.A	1.5103	0.1455	200.1	391	15/44	1
13_1_a.1151.1151.2	TRI22_HUMAN	848.363	2	K.EDQEAEK.L	1.8537	0.0193	323.8	106	38972
13_1_a.1152.1152.3	Q9H9E4	1499.75	3	R.HSNLSWQSQTRR.T	1.3863	0.0124	241.9	209	17/44	1
13_1_a.1152.1152.2	RFPL1_HUMAN	999.577	2	K.KILQMNPR.M	1.4986	0.0713	409.9	15	39035	2
13_1_a.1155.1155.2	Q6ZSE6	949.495	2	K.SSLSNNSLK.S	1.6715	0.0203	166.5	58	39006
13_1_a.1155.1155.3	Q6KG50	1423.83	3	K.TNSLPLHSVKSIK.S	1.5828	0.0764	184.1	85	16/48
13_1_a.1156.1156.1	AT8B4_HUMAN	592.316	1	R.RSSSR.R	1.2734	0.0025	68.2	60	38845	13
13_1_a.1157.1157.2	Q6ZNJ1	917.487	2	R.EMAQIGLR.L	1.6393	0.0199	129.1	821	38974
13_1_a.1157.1157.3	DPOG1_HUMAN	1375.78	3	K.HKVQPPTKQGQK.S	1.924	0.0294	316.7	26	20/44
13_1_a.1158.1158.3	FGFR3_HUMAN	1686.83	3	R.GNYTCVVENKFGSIR.Q	1.7275	0.0672	171.2	238	21/56	2
13_1_a.1158.1158.2	MAP2_HUMAN	1123.54	2	K.NGDKEFQTGK.E	1.7058	0.049	120.3	144	38978
13_1_a.1159.1159.1	Q59FM8	555.288	1	R.EPGPR.R	1.0582	0.0319	124.9	25	38845	1
13_1_a.1160.1160.2	CCNL2_HUMAN	971.563	2	K.NQIIKAER.R	1.4677	0.0202	186.8	271	38943
13_1_a.1160.1160.3	SARDH_HUMAN	1456.76	3	R.GAQVIENCPVTGIR.V	1.6807	0.1227	285	69	19/52	3
13_1_a.1163.1163.2	Q6ZTZ0	860.437	2	R.AGGVGWGTR.Q	2.1627	0.0306	318.2	124	39037
13_1_a.1163.1163.3	Q16293	1292.57	3	R.EREGADEGHHR.D	2.1011	0.0386	551.4	5	20/40
13_1_a.1164.1164.2	SHAN1_HUMAN	789.41	2	R.AGLGSQEK.S	1.9769	0.0958	291.2	97	38974
13_1_a.1164.1164.3	Q8TDR0	1185.69	3	R.RVLAGEKGEVK.G	1.3111	0.0215	169	229	13/40
13_1_a.1165.1165.2	ITA10_HUMAN	719.368	2	R.EGRETK.T	1.8112	0.0065	309.4	47	38939
13_1_a.1165.1165.3	O15268	1080.6	3	K.QGYLEKKSK.D	1.6627	0.0048	205.6	552	12024
13_1_a.1166.1166.3	Q5VWI4	1302.68	3	K.AHELASDIKYR.Q	1.5426	0.0052	189.6	154	13/40	3
13_1_a.1166.1166.2	RHG08_HUMAN	868.489	2	R.SSHLSLPK.Y	1.5723	0.0231	243.4	75	38974
13_1_a.1167.1167.3	SYT5_HUMAN	1521.83	3	R.PVQAWRELQAAPR.E	1.7453	0.1435	306.3	28	19/48
13_1_a.1167.1167.2	CT144_HUMAN	1015.58	2	R.FRSPGKAPR.E	1.6454	0.0767	349.9	6	39037
13_1_a.1168.1168.1	CG140_HUMAN	514.31	1	R.RPNK.V	1.0552	0.0085	45.3	49	38782	11
13_1_a.1170.1170.3	Q8N4E4	1123.65	3	R.KFPETKFVK.A	1.9814	0.0425	234.4	90	14/32
13_1_a.1170.1170.2	UTP11_HUMAN	749.386	2	R.KDLMDK.T	1.8284	0.0313	387.5	10	38970
13_1_a.1171.1171.2	HOOK2_HUMAN	796.406	2	K.QDHIQR.I	1.617	0.0032	256	23	38939
13_1_a.1171.1171.3	Q8NCK3	1196.56	3	K.QPYRCIECGK.F	1.7875	0.2412	267.6	37	15/36	1
13_1_a.1172.1172.1	Q96MK8	574.294	1	K.EAAGAR.P	1.4127	0.0256	165	9	38939
13_1_a.1173.1173.1	FRG1_HUMAN	615.43	1	R.RAKLK.A	1.1437	0	132.4	131	38815	6
13_1_a.1174.1174.2	PPCKM_HUMAN	769.468	2	R.KGAQLPR.I	1.4583	0.0252	284.9	5	38972
13_1_a.1174.1174.3	Q494V4	1154.68	3	K.VSAKHTSLRR.Q	1.6155	0.1255	174	92	13/36
13_1_a.1175.1175.2	Q5JVS0	932.491	2	R.RESQKER.K	1.581	0.0529	696.7	7	39033	1
13_1_a.1175.1175.3	SCG2_HUMAN	1399.68	3	K.TGEKPNGSVEPER.E	1.1484	0.0192	403.1	97	17/48	1
13_1_a.1176.1176.3	PAP2_HUMAN	1102.57	3	R.SEQPEGSLKK.E	1.4328	0.0134	87.7	587	13455
13_1_a.1176.1176.2	Q8WVK2	735.388	2	K.ETKETK.S	1.4999	0.0571	165.4	107	38908
13_1_a.1178.1178.1	HEMO_HUMAN	516.314	1	K.LNAAK.A	1.0672	0.0054	39.6	175	38815
13_1_a.1179.1179.2	ABCBB_HUMAN	1003.55	2	K.KSRLQDEK.K	1.7699	0.0496	301	73	39004
13_1_a.1179.1179.3	Q9UI61	1505.72	3	R.EDEAGKSLESERR.R	1.6802	0.105	169.7	512	16/48
13_1_a.1180.1180.3	RP29_HUMAN	1097.67	3	K.EDRLKVIPK.L	1.7836	0.001	304.5	36	14/32
13_1_a.1180.1180.2	SSNA1_HUMAN	732.389	2	R.EAGNLTK.A	1.8455	0.0071	150.9	420	38910
13_1_a.1181.1181.3	MTMR6_HUMAN	1368.75	3	K.EQTLLPVNDALR.T	1.4941	0.0579	351	35	19/44	1
13_1_a.1181.1181.2	Q7Z4H7	912.469	2	K.QGEWHKK.W	1.4652	0.0233	204.3	82	38972	1
13_1_a.1182.1182.2	HNRLL_HUMAN	1078.64	2	K.VSVSPVVHVR.G	1.7593	0.0465	132.3	97	38978
13_1_a.1182.1182.3	Q6ZMQ2	1617.73	3	-.MPAWEPGVAASCGWR.A	1.4743	0.0049	167	159	16/56
13_1_a.1183.1183.2	NCOR2_HUMAN	910.522	2	R.KKAEAAHR.I	1.4563	0.0431	90.1	789	38943
13_1_a.1183.1183.3	Q5T037	1365.69	3	R.LGAPGGGGGGGGPELGR.D	1.6266	0.1119	330.2	10	25/64	1
13_1_a.1186.1186.3	FXL11_HUMAN	1160.65	3	K.KELSEVEKAK.I	1.7595	0.0017	209.1	334	14/36
13_1_a.1186.1186.2	CBX7_HUMAN	772.483	2	R.KKFPPR.G	2.0983	0.0874	360.2	10	38970
13_1_a.1187.1187.1	CEP2_HUMAN	615.419	1	K.VQKLK.E	1.0574	0	122.9	141	38815	1
13_1_a.1188.1188.2	UBP22_HUMAN	1205.67	2	R.KITSNCTIGLR.G	1.7084	0.0241	302.1	10	13/20
13_1_a.1188.1188.3	Q6NW23	1808.82	3	R.EEGEPHSISSWPGSPGR.P	1.6997	0.0415	218.9	215	20/64
13_1_a.1191.1191.3	Q96A37	1732.92	3	K.VDKATHVEKQLSSYK.A	2.0679	0.0625	301.3	25	21/56
13_1_a.1191.1191.2	MYO3A_HUMAN	1155.58	2	K.CLTKDYEKR.P	1.8477	0.1151	332.9	3	39067
13_1_a.1192.1192.3	Q3MJ40	1056.47	3	R.KENEEHDR.P	1.4517	0.0882	208.9	175	39079
13_1_a.1192.1192.2	Q63HR6	703.435	2	K.EIKVSK.M	1.6322	0.0007	300.2	43	38939	1
13_1_a.1194.1194.3	MSRE_HUMAN	1193.58	3	R.ESSIEECKIR.Q	1.6527	0.0342	209	60	13/36	1
13_1_a.1194.1194.2	Q6B007	795.52	2	R.KPGPLKR.G	1.6815	0.0796	327.7	1	39002
13_1_a.1195.1195.1	H31_HUMAN	560.34	1	K.QLATK.A	1.2675	0	68.7	17	38876	13
13_1_a.1197.1197.2	RRBP1_HUMAN	989.49	2	K.KAEGSPSEGK.K	2.0023	0.1362	356.8	21	39039
13_1_a.1197.1197.3	Q9Y528	1485.73	3	K.RADSHEEGSLEKK.A	1.4874	0.0023	203.2	317	16/48	3
13_1_a.1198.1198.2	CSTF3_HUMAN	875.469	2	K.KAREDTR.T	1.7497	0.0847	528.5	1	39063
13_1_a.1198.1198.3	O75257	1313.66	3	R.HHYMLCGALLR.V	1.486	0.005	390.8	39	17/40	2
13_1_a.1199.1199.3	OSR11_HUMAN	1345.67	3	R.PLEKQDPFESR.R	1.55	0.0053	189.7	136	13/40
13_1_a.1199.1199.2	DTX3L_HUMAN	898.442	2	K.FADDFRK.R	1.6998	0.1358	400	2	39033
13_1_a.1202.1202.2	Q8MH62	808.406	2	R.EKMMAAK.R	1.5737	0.0274	330.2	2	38972
13_1_a.1202.1202.3	SREC2_HUMAN	1210.57	3	R.ERTFGARCDR.Y	1.9731	0.0593	574.1	1	18/36
13_1_a.1203.1203.2	FRAS1_HUMAN	800.445	2	K.QACLPLR.C	2.0737	0.1075	332.5	5	39002
13_1_a.1203.1203.3	SO1B1_HUMAN	1201.66	3	R.ASPEIVGKGCLK.E	1.7729	0.0205	243.9	185	17/44
13_1_a.1204.1204.2	Q53GQ4	792.385	2	R.QSQAGSSK.F	1.6385	0.084	218.1	15	39004
13_1_a.1204.1204.3	AL3A2_HUMAN	1189.63	3	K.LRYPPNSQSK.V	1.5749	0.0409	198.7	73	16/36
13_1_a.1205.1206.3	MTM1_HUMAN	1227.73	3	K.LVLTGAIQVADK.V	1.9963	0.0463	334.2	21	17/44
13_1_a.1205.1206.2	Q8N7S3	818.425	2	K.EISNIDK.M	1.8567	0.0264	345	37	39002
13_1_a.1208.1208.2	ZN169_HUMAN	904.421	2	R.ECGRHFR.Y	1.4827	0.0345	357.5	11	39002	1
13_1_a.1208.1208.3	Q3V6T2	1358.75	3	K.ELEKENKELVK.R	1.283	0.0103	454.8	20	20/40
13_1_a.1210.1210.2	XPC_HUMAN	860.458	2	K.QEKATQR.R	1.9942	0.0479	255.5	290	38972
13_1_a.1210.1210.3	IPO8_HUMAN	1288.68	3	K.SLIEDKEMPVK.V	1.8225	0.0604	384.1	36	16/40
13_1_a.1211.1211.1	NOLC1_HUMAN	554.33	1	K.PAAAPK.Q	1.086	0.1287	230.8	3	38908	1
13_1_a.1212.1212.3	Q96JG4	1799.96	3	-.VSVISEADPQALLQAMK.D	1.6402	0.035	731.9	32	25/64
13_1_a.1212.1212.2	O60303	1199.67	2	R.VVTNLIDGVNR.T	1.4451	0.0243	437.3	39	13/20
13_1_a.1213.1213.3	RFC1_HUMAN	1052.54	3	K.KETDVFWK.S	1.0805	0.0547	135.2	159	38988
13_1_a.1213.1213.2	CHD6_HUMAN	701.383	2	R.KAEEPK.K	1.606	0.1019	395.2	15	38970
13_1_a.1214.1214.3	Q6ZS81	1919.99	3	R.PFADLLGTAFSSSGSLPPR.I	1.5101	0.0154	338.2	29	23/72
13_1_a.1214.1214.2	SFRS3_HUMAN	1279.68	2	R.NRGPPPSWGRR.P	1.7804	0.1383	609.7	1	14/20	1
13_1_a.1215.1215.1	Q6I983	590.289	1	R.ESAGAR.A	1.1485	0.0344	194.9	1	38939	1
13_1_a.1216.1216.1	Q58FF2	645.393	1	K.KIAGEK.Y	1.282	0	145.4	60	38908
13_1_a.1220.1220.2	Q8TB78	1153.58	2	R.WDFFAALAGR.T	1.6027	0.1175	336.2	1	13/18
13_1_a.1220.1220.3	Q9NY74	1727.87	3	K.EICTFNSKTVKNTSR.A	1.9469	0.0473	202.8	284	20/56
13_1_a.1221.1221.2	RIOK3_HUMAN	1264.73	2	K.GFIGKGKDITTK.H	1.633	0.117	293.7	11	13/22
13_1_a.1221.1221.3	WDR74_HUMAN	1894.96	3	R.GLQCHPSKPLLASCGLDR.V	1.5482	0.0735	309.9	30	22/68
13_1_a.1222.1222.3	SETB1_HUMAN	1120.52	3	K.KEDTDDRNK.M	1.7669	0.0344	255.5	462	15/32
13_1_a.1222.1222.2	TBX2_HUMAN	746.441	2	R.VSGLDKK.A	1.9085	0.0189	343.1	44	38972	1
13_1_a.1223.1223.3	CH001_HUMAN	1175.68	3	R.RVTDPSLIFK.Q	1.9199	0.0291	195.1	313	14/36
13_1_a.1223.1223.2	MGR4_HUMAN	783.484	2	K.KGSHVKK.C	2.2361	0.2069	417.6	3	39033	1
13_1_a.1226.1226.2	5HT1F_HUMAN	1087.64	2	R.AAKTLYHKR.Q	1.0369	0.0513	125	228	38976
13_1_a.1226.1226.3	O43379	1631.8	3	K.SISVIDFYSGECIAK.M	1.5984	0.1691	150.2	341	14/56
13_1_a.1227.1227.2	Q7Z3Q9	843.53	2	K.KTLPKEK.S	1.8948	0.1605	382.3	19	39002
13_1_a.1227.1227.3	Q6NVY7	1265.72	3	R.KLPDLEKTGHK.-	1.656	0.0227	225.1	197	15/40
13_1_a.1228.1228.3	MASP_HUMAN	1223.62	3	K.ELETVDFKDK.L	1.9774	0.0296	146	328	13455	1
13_1_a.1228.1228.2	PCLO_HUMAN	814.431	2	K.KPTPEDK.K	1.8758	0.072	263.8	67	38972
13_1_a.1229.1229.3	Q8TCE1	1516.83	3	R.SLNPNRVTFKANR.P	1.9123	0.1149	494.2	1	21/48
13_1_a.1229.1229.2	LSD1_HUMAN	1012.54	2	K.EASEVKPPR.D	1.5729	0.0594	270.8	15	39006
13_1_a.1230.1230.3	ACTN1_HUMAN	1786.01	3	R.DGLKLMLLLEVISGER.L	1.7296	0.0073	229.1	186	18/60	1
13_1_a.1230.1230.2	Q6ZV66	1189.65	2	K.TRASMNQLLR.I	1.8078	0.028	161.3	302	38978
13_1_a.1231.1231.2	MGR4_HUMAN	867.516	2	K.KEKGIHR.L	1.4788	0.0258	123.4	176	38910	2
13_1_a.1231.1231.3	CHIC1_HUMAN	1300.7	3	R.GAGHITVFGLSNK.F	1.8537	0.0875	222.2	56	16/48	2
13_1_a.1232.1232.3	ANKS1_HUMAN	1142.7	3	R.KRIIASLADR.P	1.5946	0.0088	226.2	37	14/36	1
13_1_a.1232.1232.2	Q6PK37	760.431	2	-.ERTVAGK.D	1.7224	0.0575	360.7	2	39002
13_1_a.1234.1234.3	GPC2_HUMAN	1062.49	3	R.DGSGGKGGGGSAR.Y	1.4364	0.1286	217.6	136	15/48
13_1_a.1234.1234.2	MYPT1_HUMAN	708.316	2	K.ESETSR.E	1.2364	0.0553	148.2	44	38878
13_1_a.1235.1235.2	CAC1I_HUMAN	873.527	2	R.ETRAKLR.G	1.577	0.0452	245.5	144	38972
13_1_a.1235.1235.3	FOXQ1_HUMAN	1310.73	3	K.VLRDPSRPWGK.D	1.6636	0.0053	218.1	158	14/40
13_1_a.1236.1236.2	Q4G143	1090.59	2	K.KASMEVQAVK.S	1.5545	0.0284	221.8	224	39039	1
13_1_a.1236.1236.3	FUT8_HUMAN	1636.73	3	R.DNDHPDHSSRELSK.I	1.5346	0.045	333.3	71	20/52
13_1_a.1237.1237.3	PHLB1_HUMAN	1570.8	3	R.SSSYHLALQPPQSR.P	2.0448	0.0258	290.9	5	21/52
13_1_a.1237.1237.2	Q5T7Q4	1046.55	2	K.QDKIQTGEK.H	2.2926	0.0746	154	380	38945
13_1_a.1238.1238.2	PK3CA_HUMAN	1211.64	2	K.YIRSCIMLGR.M	1.682	0.0532	266	17	39039	1
13_1_a.1238.1238.3	Q75VX8	1818	3	R.PPPGLDLISFGAAGPPRR.E	1.9195	0.0197	298.6	62	22/68	1
13_1_a.1239.1239.2	NSF_HUMAN	753.437	2	K.KAPPQGR.K	1.3826	0.0197	143.9	162	38910
13_1_a.1239.1239.3	Q5GCA0	1130.62	3	K.RVRDVGCGLR.H	1.6754	0.0963	278.9	16	17/36	2
13_1_a.1240.1240.3	CHD2_HUMAN	1073.52	3	K.ENASEGKGPGK.R	1.5552	0.0373	214.9	417	13/40
13_1_a.1240.1240.2	NSBP1_HUMAN	716.419	2	K.EIVEVK.E	1.8178	0.0058	472.1	4	38970	5
13_1_a.1243.1243.1	Q8N5E1	570.325	1	R.KPTQP.-	1.0154	0.0972	98.9	4	38876
13_1_a.1245.1245.3	Q4VWF5	1568.79	3	R.RLCMLYHPDKHR.D	1.8518	0.0925	378.7	53	18/44	3
13_1_a.1245.1245.2	MLH3_HUMAN	1045.61	2	R.KESIICKPK.N	1.6345	0.0173	199.8	276	38945
13_1_a.1246.1246.3	FBX27_HUMAN	1593.72	3	R.GQDTQFWAGHYGAR.V	1.8112	0.0191	176.6	201	18/52
13_1_a.1246.1246.2	Q9H8D1	1061.61	2	K.QLAAVYAGLR.A	1.3933	0.0121	248	34	39069
13_1_a.1247.1247.2	Q6P087	901.535	2	R.KDILEGVK.K	1.9427	0.0267	644.7	1	13/14
13_1_a.1247.1247.3	VKGC_HUMAN	1350.67	3	R.NTPFHERFFR.F	1.6761	0.0098	258.4	763	15/36
13_1_a.1248.1248.3	RNPS1_HUMAN	1864.98	3	R.FSPPRRMLPPPPMWR.R	1.6157	0.0065	338.1	14	23/56
13_1_a.1248.1248.2	Q6ZND7	1244.65	2	K.SATDTKFFSLK.S	1.8564	0.0074	611.1	1	16/20
13_1_a.1250.1250.2	Q6PI77	729.462	2	K.KAAIQAK.A	1.7322	0.0049	521.9	21	38972	1
13_1_a.1250.1250.3	Q7Z417	1093.6	3	K.QTVKANTFGK.A	1.5851	0.0107	191	417	13455
13_1_a.1252.1252.1	ASSY_HUMAN	627.419	1	K.KGVPVK.V	1.0586	0.1613	89.2	3	38847
13_1_a.1253.1253.2	Q5RHP9	787.479	2	K.KAEGKVR.K	1.6895	0.0243	296.4	6	38972
13_1_a.1253.1253.3	Q9BWX4	1181.57	3	K.QALKAGDGCYR.R	1.5959	0.0284	278.7	2	18/40	2
13_1_a.1254.1254.3	Q9BZV3	1299.68	3	K.QPLDRRETER.Q	2.1048	0.0344	357.1	18	17/36
13_1_a.1254.1254.2	GRIP1_HUMAN	865.416	2	R.QASFQER.S	1.5376	0.0031	186.4	231	38972
13_1_a.1255.1255.2	Q9UHY0	955.593	2	K.EVKLPGKGK.S	1.4375	0.0421	173.3	303	39006	2
13_1_a.1255.1255.3	Q96JI8	1432.76	3	R.MKGQAFIGLPNEK.A	1.7134	0.0075	276.1	192	19/48	1
13_1_a.1256.1256.3	NU214_HUMAN	1147.67	3	K.QRHLLVPER.E	1.4548	0.0657	254	4	14/32	3
13_1_a.1256.1256.2	MYO10_HUMAN	764.441	2	R.KAGYAVR.R	1.7277	0.0471	220.2	10	38972
13_1_a.1258.1258.2	O60667	1188.65	2	K.VEGELGGSVTIK.C	2.0678	0.1372	474.6	10	14/22
13_1_a.1258.1258.3	PTN12_HUMAN	1783.9	3	R.TPESFVLASEHNTPVR.S	1.525	0.0552	333.3	25	22/60
13_1_a.1260.1260.2	Q6PK04	967.521	2	R.QPEVQAAPK.E	1.2828	0.0561	149.9	120	38976
13_1_a.1260.1260.3	SCYBD_HUMAN	1451.83	3	R.IQILPRGNGCPRK.E	1.6524	0.0327	354.3	7	19/48
13_1_a.1261.1261.3	RHG04_HUMAN	1392.76	3	R.GLEKLAERFSSR.G	1.5913	0.0069	316.6	76	18/44	1
13_1_a.1261.1261.2	REM2_HUMAN	929.557	2	R.FLANLVPR.N	1.5449	0.0149	444.5	5	39065
13_1_a.1262.1262.1	TCPQ_HUMAN	526.298	1	K.PAGGPK.P	1.1999	0.0808	107.9	5	38878
13_1_a.1263.1263.2	Q9H021	997.517	2	R.QQGGGAAGPVR.R	2.0716	0.1891	391.2	1	15/20
13_1_a.1263.1263.3	Q6ZSC9	1495.77	3	R.QNQERPNPSAKAR.M	1.9815	0.0363	347.8	5	20/48
13_1_a.1264.1264.2	Q5J8M2	987.522	2	K.QSLTQTPGR.E	1.8729	0.0808	386.7	11	39067	3
13_1_a.1264.1264.3	SPRE1_HUMAN	1481.66	3	R.YADYRHPDMWK.N	1.7918	0.03	250.4	243	15/40
13_1_a.1266.1266.1	CP26C_HUMAN	521.283	1	R.FGAAR.E	1.2615	0.0669	59.9	85	38815	1
13_1_a.1267.1267.3	Q5T9J7	1087.55	3	R.EYKTKSCTK.W	1.7976	0.0017	257.4	25	15/32
13_1_a.1267.1267.2	Q8N4S0	724.399	2	R.QKSYAK.D	1.671	0.0503	183.6	88	38908
13_1_a.1268.1268.2	Q8TET9	835.394	2	R.ETGFPER.D	1.5746	0.0313	296.5	26	38972
13_1_a.1268.1268.3	Q9NWJ7	1253.72	3	R.KPGLGVPGSSGAVK.R	2.074	0.1354	475.5	14	24/52
13_1_a.1269.1269.3	AT11C_HUMAN	1446.69	3	K.VHVERNAMDGYR.T	1.536	0.077	222	210	17/44
13_1_a.1269.1269.2	TRI50_HUMAN	963.483	2	R.KFHSMASR.A	1.4155	0.0514	160.9	167	38943
13_1_a.1272.1272.3	Q6ZR75	1877.1	3	R.QFAIGVFQSLSLGLRLK.Q	1.494	0.1673	156.9	292	19/64
13_1_a.1272.1272.2	ZN124_HUMAN	1250.65	2	K.QCQKTSLSVTR.V	1.5415	0.0515	141.1	180	39010	1
13_1_a.1274.1275.2	Q6N021	1286.68	2	K.LKQDQKANGER.R	1.2516	0.0305	95.1	218	38949
13_1_a.1274.1275.3	Q5FWF6	1929.86	3	K.QCHLQNKPYRCHDCGK.C	1.2861	0.1407	148.6	85	16/60
13_1_a.1276.1276.1	SNP23_HUMAN	681.32	1	K.NFESGK.A	1.1886	0.1375	97.3	11	38908
13_1_a.1278.1278.3	DTX3L_HUMAN	1945.02	3	K.GGELTLLGTQDDISAAKQK.I	2.0631	0.1426	588.8	2	26/72
13_1_a.1278.1278.2	TPP2_HUMAN	1296.63	2	K.LDSSDIYNELK.E	1.1732	0.0137	341.4	1	39041	2
13_1_a.1280.1280.2	Q9BUZ6	833.499	2	R.LERFLR.A	1.1813	0.0729	234.3	216	38908	1
13_1_a.1280.1280.3	CHD1_HUMAN	1250.62	3	K.QISFNGSEGRR.S	1.3865	0.0128	621	11	19/40
13_1_a.1283.1283.2	MSPD2_HUMAN	1264.62	2	K.TSEDICLQLSR.L	1.37	0.1129	232.8	63	38980
13_1_a.1283.1283.3	ANKS1_HUMAN	1894.91	3	R.LEKSPSFASEWDEIEK.I	1.2404	0.0453	159.3	891	15/60
13_1_a.1284.1284.2	NAGS_HUMAN	1318.68	2	R.GGTGGARRLSCGAR.R	1.325	0.0112	69.9	498	39077
13_1_a.1284.1284.3	Q9UPX0	1975.93	3	R.GPDGRFVMDPAEMEPSLK.S	1.407	0.0858	87.8	756	16/68
13_1_a.1285.1285.3	BRCA2_HUMAN	1240.69	3	K.QVSILESSLHK.V	1.6976	0.1911	274.1	2	16/40
13_1_a.1285.1285.2	Q9H5N3	826.489	2	R.QTGHKKK.L	1.5921	0.0497	246	4	39002	1
13_1_a.1286.1286.3	Q13395	1991.15	3	K.LLVLSALAEKLLPEPGGDR.A	1.6542	0.1512	178	228	19/72
13_1_a.1286.1286.2	E41L3_HUMAN	1326.8	2	K.RLSTSPVRLAAR.Q	1.3267	0.0647	76.1	293	38920
13_1_a.1287.1287.1	SMOC2_HUMAN	1264.66	1	R.YPTLWTEQVK.S	1.3507	0.2048	88.3	235	38978
13_1_a.1288.1288.3	RBM34_HUMAN	1780.92	3	R.LGQVASSLFRGEHHSR.G	1.4663	0.0751	230.2	237	20/60	1
13_1_a.1288.1288.2	O60667	1188.65	2	K.VEGELGGSVTIK.C	1.3525	0.0352	238.9	84	39043
13_1_a.1290.1290.3	CN108_HUMAN	1900.84	3	K.NNFEFCEAHIPFYNR.G	1.6398	0.207	249.9	47	17/56	1
13_1_a.1290.1290.2	Q709C8	1266.67	2	K.VYLKDTATAER.A	2.0581	0.0857	232.5	17	39010	1
13_1_a.1292.1292.1	GCYA3_HUMAN	734.427	1	R.KTSRSR.V	1.2267	0.0158	136.7	35	38908	3
13_1_a.1293.1293.1	TYY1_HUMAN	702.305	1	K.EDDAPR.T	1.1331	0.2285	38.6	151	38817
13_1_a.1295.1295.3	Q96EA4	1657.91	3	K.VELDEARLSEKQLK.H	1.2227	0.1045	394.7	7	20/52	1
13_1_a.1295.1295.2	CENPF_HUMAN	1103.59	2	R.QSLEKLEEK.M	1.6632	0.0347	264.3	98	38976	1
13_1_a.1296.1296.2	PRRT1_HUMAN	1330.71	2	R.LGAGGLASSAATAQR.G	1.678	0.0526	122.5	59	39049
13_1_a.1296.1296.3	MACF1_HUMAN	1996.01	3	R.QEQLELTLGRVEDFYR.K	1.8997	0.098	208.5	50	20/60	2
13_1_a.1298.1298.1	GRK7_HUMAN	518.293	1	K.KGGEK.M	1.1917	0.0226	78.3	92	38845	2
13_1_a.1299.1299.3	Q71SF7	1605.82	3	K.RDTINPLYDETLR.Y	2.0196	0.0369	265.2	109	18/48
13_1_a.1299.1299.2	TF3B_HUMAN	1070.59	2	K.MAVSRHLTR.G	2.1771	0.1823	556	2	13/16
13_1_a.1302.1302.2	HUTU_HUMAN	739.396	2	R.EAARHR.L	1.3576	0.0535	101.1	262	38908	1
13_1_a.1302.1302.3	FA50A_HUMAN	1109.61	3	K.KWDKYTIR.-	1.263	0.0121	127.7	495	39049	1
13_1_a.1303.1303.1	FBN1_HUMAN	558.325	1	R.NPVTK.S	1.0566	0.0391	46.3	101	38815	1
13_1_a.1304.1304.2	Q9ULE4	1299.73	2	R.LELQALEEKAR.Q	1.4214	0.095	356.4	1	13/20
13_1_a.1304.1304.3	KIF4A_HUMAN	1952	3	R.VKEKFLEQSMDIEDLK.Y	2.2333	0.0499	310.2	42	20/60
13_1_a.1306.1306.2	RRBP1_HUMAN	1029.53	2	R.KAEGTPNQGK.K	2.5874	0.194	529.5	2	13/18	2
13_1_a.1306.1306.3	APXL_HUMAN	1543.81	3	R.SPSPQFAPQKLTDK.P	1.9121	0.0768	237.1	46	17/52
13_1_a.1307.1307.3	FA38B_HUMAN	1892.96	3	K.MIAGNSTESSKTPVTIEK.I	1.5835	0.0556	208.4	338	21/68
13_1_a.1307.1307.2	Q96PP4	1262.62	2	R.TAPGESAFRNGR.A	1.4812	0.0437	160.6	233	38982
13_1_a.1308.1308.2	RAPSN_HUMAN	1173.57	2	R.AQDLAEEVGNK.L	1.5804	0.0651	359.8	30	39071	1
13_1_a.1308.1308.3	ZXDA_HUMAN	1760.93	3	R.GTLQGGGGGGIPAGGGRVHR.G	1.7799	0.1323	640.3	1	27/76	1
13_1_a.1309.1309.2	Q5VYX6	813.556	2	K.KPSLLKK.P	2.0203	0.1432	301.9	3	39033
13_1_a.1309.1309.3	Q68DK2	1219.7	3	R.KLAELQVYQK.I	2.234	0.1308	298.2	2	18/36
13_1_a.1310.1310.2	SNX23_HUMAN	1203.63	2	K.QKSDKAELER.M	2.1674	0.0011	620	17	13/18	1
13_1_a.1310.1310.3	Q8IV27	1804.92	3	K.QCQEWLSRLSRATAR.P	2.0216	0.041	584.5	23	22/56
13_1_a.1311.1311.1	MYPT2_HUMAN	614.362	1	R.QPLTR.R	1.3987	0	110.2	14	38876	1
13_1_a.1312.1312.2	O95926	805.435	2	K.KKECAAR.G	1.3696	0.0134	242.8	56	38941
13_1_a.1312.1312.3	Q5VUS0	1208.6	3	K.KNCKAMFPNR.R	1.5431	0.0118	231.4	37	13/36
13_1_a.1314.1314.3	Q8TCY6	1116.67	3	K.SSLVNLLSRK.P	1.8937	0.0025	232.6	168	14/36	1
13_1_a.1314.1314.2	SI1L3_HUMAN	744.461	2	R.ELITLR.G	1.9946	0	408.5	5	38970
13_1_a.1315.1315.3	S12A3_HUMAN	1918.01	3	K.IRVFVGGQINRMDQER.K	1.359	0.0362	339.6	90	19/60
13_1_a.1315.1315.2	Q96AA3	1277.66	2	R.NGAFINWKEAK.L	1.3952	0.0086	333.8	20	39041
13_1_a.1317.1317.3	CABP4_HUMAN	1165.53	3	R.EFDRDRDGR.I	2.0909	0.0095	235.1	311	13/32
13_1_a.1317.1317.2	Q6ZMU1	776.408	2	K.ELCRQK.N	1.5616	0.0103	411.7	20	39000
13_1_a.1318.1318.3	ADCY1_HUMAN	1914.02	3	K.VSVKGKGEMLTYFLEGR.T	1.3626	0.0288	180	433	17/64
13_1_a.1318.1318.2	Q7Z7D6	1276.67	2	K.QTVVSSTENXAK.S	1.5291	0.0154	255.6	78	39043
13_1_a.1319.1319.3	FBXL7_HUMAN	1172.64	3	R.YLVIYCASIK.E	1.5154	0.069	306.3	14	15/36
13_1_a.1319.1319.2	Q96RW0	781.377	2	R.QMIMMK.K	1.6195	0.0137	426.8	3	38970	8
13_1_a.1323.1323.2	AMRP_HUMAN	1295.72	2	R.SREKHALLEGR.T	1.7298	0.1297	148	40	39010
13_1_a.1323.1323.3	CAR15_HUMAN	1943.06	3	R.SLRKHFHSIPPAAPGEAK.S	1.7996	0.0725	146.5	390	19/68
13_1_a.1324.1324.2	AP1B1_HUMAN	787.456	2	K.EVVLAEK.P	2.2214	0.0532	630.6	19	39002	1
13_1_a.1324.1324.3	SSF1_HUMAN	1181.61	3	K.QEQREAHRK.K	1.612	0.1122	345	13	13/32
13_1_a.1325.1325.2	PHAR2_HUMAN	1001.5	2	R.EAAGSSHSKK.T	1.874	0.0409	420.5	114	39069
13_1_a.1325.1325.3	AIG1_HUMAN	1501.77	3	R.GSGNQEQERQLKK.L	2.0537	0.0821	492.7	25	21/48	1
13_1_a.1326.1326.2	UHRF2_HUMAN	1067.61	2	K.RTNGNIKHK.S	1.9326	0.0081	381	10	39037
13_1_a.1326.1326.3	Q6NUN7	1602.85	3	R.DVKLGGLGPDFESIR.D	1.4587	0.0312	338.9	101	19/56
13_1_a.1327.1327.2	PROSC_HUMAN	979.521	2	R.IGSTIFGER.D	1.2809	0.0021	310.4	7	39006
13_1_a.1327.1327.3	Q5QHF2	1470.84	3	R.APRAVLLETTFPR.A	1.8447	0.0903	359	23	19/48
13_1_a.1330.1330.3	CASP4_HUMAN	1260.61	3	K.KYYDAKTEDK.V	1.1645	0.0306	220.8	152	13485	1
13_1_a.1330.1330.2	IF38_HUMAN	840.457	2	R.EHVVAASK.A	1.4362	0.0104	204.6	192	38943
13_1_a.1331.1331.3	FILA_HUMAN	1376.65	3	R.RQDSSVVGDSGNR.G	1.52	0.2259	484.3	5	21/48
13_1_a.1331.1331.2	Q9Y3S3	916.532	2	-.QDTRLRK.L	1.3867	0.0801	216.4	265	38941
13_1_a.1333.1333.3	NEST_HUMAN	1272.69	3	K.EQRGLVEGASVK.G	1.8141	0.0909	377.4	55	17/44	2
13_1_a.1333.1333.2	Q5JSF6	847.452	2	K.EKGKEEK.V	1.6804	0.0268	360.8	60	38972
13_1_a.1334.1334.1	Q6ZN84	592.257	1	K.DQSDK.E	1.0262	0.005	56.9	106	38845	3
13_1_a.1335.1335.2	Q9H2V5	1308.68	2	R.PNHPQAFVGSVR.E	1.3776	0.0362	219.1	8	39073
13_1_a.1335.1335.3	CTGF_HUMAN	1962.91	3	R.VKLPGKCCEEWVCDEPK.D	1.549	0.0032	121.2	817	15/64
13_1_a.1336.1336.3	DSPP_HUMAN	1647.65	3	K.SDSSKSESDSSDSDSK.S	1.9887	0.1682	376.1	12	22/60
13_1_a.1336.1336.2	S45A1_HUMAN	1097.54	2	R.PGRQQPSGDR.D	1.8125	0.1156	195.7	93	38978
13_1_a.1338.1338.3	Q8NFG4	1490.78	3	R.DVDLVQSAFEVLR.T	1.422	0.0394	202.3	184	17/48
13_1_a.1338.1338.2	Q8IYP8	994.579	2	R.RPASLTPPR.A	1.7739	0.032	311.6	8	39067	1
13_1_a.1339.1339.3	ATS7_HUMAN	1068.59	3	R.QAPERLAQR.G	1.43	0.0189	139.5	413	11994	2
13_1_a.1339.1339.2	Q86WR9	711.353	2	R.EHAAQR.L	1.35	0.0073	308.9	1	38939
13_1_a.1341.1341.1	Q6NUI1	630.321	1	R.GGAGGSPK.P	1.1154	0.1468	135.9	98	38943
13_1_a.1343.1343.3	CT006_HUMAN	1187.66	3	R.KEQELTQAIK.K	1.9289	0.0764	224	190	14/36
13_1_a.1343.1343.2	GBRA4_HUMAN	790.409	2	R.QTWIDK.R	2.0018	0.0874	421	5	38970	1
13_1_a.1344.1344.2	Q8WY70	1101.59	2	K.ELVDKNIDR.F	1.2741	0.0296	231.3	62	39037	2
13_1_a.1344.1344.3	MYOM1_HUMAN	1652.81	3	K.YVMELFDGKTGHQK.T	1.4229	0.0202	246.9	291	19/52	1
13_1_a.1346.1346.2	RL15_HUMAN	863.44	2	K.KQSDVMR.F	1.6526	0.0547	244.6	11	39002	3
13_1_a.1346.1346.3	NOP14_HUMAN	1295.72	3	R.KASGAPAGARGGPAK.A	2.1836	0.0262	360.6	1	23/56
13_1_a.1347.1347.1	H2BA_HUMAN	828.421	1	K.HAVSEGTK.A	1.9098	0.4799	385.8	1	39004	16
13_1_a.1348.1348.3	Q6ZMC4	1588.83	3	R.LEAGWFQPFLQPR.A	1.9991	0.0463	260.7	65	19/48
13_1_a.1348.1348.2	Q9H2N4	1058.57	2	R.KGTPTNRER.E	1.959	0.0154	270.5	44	39067
13_1_a.1349.1349.2	Q9H5Q4	721.447	2	R.KHLPAR.N	1.898	0.0728	458.7	12	38970
13_1_a.1349.1349.3	EPHB4_HUMAN	1082.58	3	R.EVPPAVSDIR.V	1.6515	0.0031	278.3	221	14/36	1
13_1_a.1350.1350.2	H12_HUMAN	798.52	2	K.KPVGAAKK.P	1.8677	0.0134	369.1	9	39004
13_1_a.1350.1350.3	ABCG8_HUMAN	1199.67	3	K.RVEDVIAELR.L	1.4766	0.0201	138.4	341	13485
13_1_a.1354.1354.1	DDX52_HUMAN	516.314	1	R.LGAGAK.F	1.1993	0.0112	87.1	140	38847
13_1_a.1355.1355.3	Q8IV12	1153.64	3	R.HVAVHHARAR.R	1.6428	0.0398	371.7	1	14/36
13_1_a.1355.1355.2	CHST3_HUMAN	770.431	2	R.QPAWLR.G	1.7653	0.0134	172.1	21	38908
13_1_a.1356.1356.1	EXOC4_HUMAN	840.457	1	K.YRSTVSK.S	1.1283	0.1615	91.7	126	38880	1
13_1_a.1357.1357.1	Q6ZRP9	502.277	1	R.AHFK.T	1.0376	0.0924	72.5	65	38782	4
13_1_a.1358.1358.3	Q5T1C0	1972.9	3	R.SLERTTSGDDACNLTSFR.P	1.3323	0.0165	178.7	115	19/68	1
13_1_a.1358.1358.2	Q5ETU4	1314.64	2	R.EQANLEDRSPR.R	1.5824	0.2077	76.9	763	38949	1
13_1_a.1359.1359.3	CB015_HUMAN	1374.67	3	K.SATQVSAIHMDSK.V	1.6987	0.0464	211.9	231	16/48
13_1_a.1359.1359.2	Q6ZUA4	915.537	2	R.RSLSLSPR.L	1.8676	0.067	398.6	11	39035	1
13_1_a.1360.1360.2	CAV1_HUMAN	851.426	2	R.EQGNIYK.P	1.2866	0.021	130.8	312	38910	1
13_1_a.1360.1360.3	O60364	1275.66	3	R.FYLEFGCLRK.A	1.7536	0.1304	284.4	65	14/36	2
13_1_a.1362.1362.3	Q6MZI5	1259.7	3	K.KAPSQKESVGTK.L	1.2942	0.0828	204	501	13/44	1
13_1_a.1362.1362.2	UBP4_HUMAN	840.469	2	K.KHQQATK.K	1.5584	0.106	345.6	54	38972	1
13_1_a.1363.1363.1	Q96QE3	687.415	1	R.QNLKGK.R	1.0855	0.0067	86.7	199	38847
13_1_a.1364.1364.3	Q5VSY9	1536.86	3	K.WKTVQPHTVTALR.N	1.8828	0.1731	143	487	18/48	1
13_1_a.1364.1364.2	Q8NAF6	1025.58	2	K.FRSNLYLL.-	1.7434	0.0161	304	35	39004
13_1_a.1366.1366.3	Q6PCD5	1105.53	3	R.AGGSQRTDSAR.L	1.0918	0.0276	188.3	87	15/40
13_1_a.1366.1366.2	ZN123_HUMAN	736.399	2	K.KAFDQK.I	1.157	0.0347	93.5	599	38878
13_1_a.1367.1367.1	HEM0_HUMAN	547.284	1	R.NSGAAK.F	1.0645	0.0417	176.3	2	38908	1
13_1_a.1368.1368.3	Q5T0N0	1128.57	3	K.KTYMQACKR.S	1.5247	0.0076	294.4	6	16/32	1
13_1_a.1368.1368.2	Q9P2Q1	752.39	2	K.KTSSSSR.P	1.4476	0.0036	133.4	195	38941
13_1_a.1371.1371.2	Q7Z3Z3	1125.67	2	K.KQPLLVSQGR.W	1.346	0.0236	275.5	11	39069
13_1_a.1371.1371.3	Q9H876	1688.96	3	K.KMVHRSGPTLLPPQK.D	2.2744	0.2067	757.3	1	29/56
13_1_a.1373.1373.3	YLPM1_HUMAN	1921.11	3	R.QHEIILKAAQELKMLR.E	1.5749	0.0597	434.2	31	21/60
13_1_a.1373.1373.2	SNX11_HUMAN	1281.63	2	K.SCCFLPRSGRR.S	1.731	0.1221	579.3	1	13/20
13_1_a.1374.1374.1	K1543_HUMAN	615.394	1	R.RAQLK.L	1.2339	0	127	94	38815	2
13_1_a.1375.1375.3	ETV5_HUMAN	1824.86	3	K.DPRLYFDDTCVVPER.L	1.5264	0.0187	322.3	107	18/56
13_1_a.1375.1375.2	BTNL3_HUMAN	1215.65	2	K.GKIQAELDWR.R	1.8126	0.0452	546.4	8	13/18	1
13_1_a.1376.1376.3	Q9P2I8	1474.82	3	R.LTKSVLTNTGPSTR.R	1.7671	0.0513	281.9	129	20/52
13_1_a.1376.1376.2	Q4ZHG4	982.591	2	K.RTLRPPSR.H	1.4946	0.0075	153	298	38974
13_1_a.1378.1378.1	DACH1_HUMAN	615.455	1	K.VKKIK.L	1.1085	0	125.3	118	38815	2
13_1_a.1380.1380.2	FBXL7_HUMAN	940.489	2	R.FVSDFGLR.E	1.1031	0.0238	204.7	72	38974
13_1_a.1380.1380.3	Q9NWG0	1410.7	3	R.TPSGGVFFEGSVAR.F	1.3688	0.035	267.5	95	17/52	2
13_1_a.1381.1381.3	COAA1_HUMAN	1308.7	3	K.RGENGVPGQPGIK.G	1.6112	0.0246	265.6	49	19/48
13_1_a.1381.1381.2	Q96MT5	873.497	2	-.MKLSAAPR.V	1.4952	0.0148	293.9	7	39035
13_1_a.1382.1382.1	M3K10_HUMAN	560.315	1	R.GGALSR.V	1.4194	0.0601	73.2	59	38878
13_1_a.1383.1383.3	Q6ZUV2	1281.71	3	R.RPRLSGPAGGSAR.P	1.3202	0.0401	379.5	2	20/48
13_1_a.1383.1383.2	Q6ZW80	854.412	2	K.SYERGSR.R	1.2914	0.0377	182.7	91	38941
13_1_a.1384.1384.2	DSC2_HUMAN	897.479	2	R.SSSGIRYK.K	1.276	0.0095	162.8	278	38943
13_1_a.1384.1384.3	EP400_HUMAN	1344.69	3	R.SSPVNRPSSATNK.A	1.5725	0.0536	421.2	27	20/48
13_1_a.1386.1386.3	ANC4_HUMAN	1205.67	3	R.KVSCVLSSNLR.H	1.8421	0.0112	469.7	14	19/40	1
13_1_a.1386.1386.2	DOK5_HUMAN	802.478	2	K.KASSKGPK.R	2.1861	0.1091	340.6	45	39035
13_1_a.1387.1387.1	OR4B1_HUMAN	572.279	1	K.ENPGR.E	1.1937	0.0412	113.6	19	38876	1
13_1_a.1388.1388.3	Q6ZRP4	1159.63	3	K.EVLDSQSIIR.P	2.0194	0.0239	220	305	14/36	1
13_1_a.1388.1388.2	Q8N2A8	771.484	2	R.KAGIQVR.H	1.9402	0.0413	318.2	22	38972
13_1_a.1389.1389.3	RT09_HUMAN	1315.65	3	R.QRAIQWGEDGR.P	1.2954	0.0207	290.5	131	15/40	1
13_1_a.1390.1390.3	Q9H878	1486.78	3	-.MEPRAGVSKQDIR.E	1.585	0.0141	349.5	171	19/48
13_1_a.1390.1390.2	Q6ZMX4	991.482	2	R.PFHFMANK.-	1.5703	0.1518	265	66	39004
13_1_a.1391.1391.3	Q5VUM1	1685.92	3	R.LPWLLSWVSATAWR.A	1.6567	0.019	136.7	449	14/52
13_1_a.1391.1391.2	Q5SSY1	1123.57	2	R.LSRFMGEGAR.S	1.9178	0.0904	108.4	296	39008
13_1_a.1392.1392.2	PX19_HUMAN	823.467	2	R.FKSNVTK.T	1.8394	0.0388	218.3	66	38972
13_1_a.1392.1392.3	ITA1_HUMAN	1235.65	3	R.KEAFTEARGAR.R	1.9204	0.0672	159.7	214	15/40
13_1_a.1394.1394.2	TYY1_HUMAN	702.305	2	K.EDDAPR.T	1.7396	0.0108	518.4	6	38970
13_1_a.1394.1394.3	MYOZ2_HUMAN	1052.54	3	R.VATPFGGFEK.A	1.567	0.2547	139.1	196	13424
13_1_a.1395.1395.3	Q9P1Y6	1801.91	3	R.PQSTGLSCQGRSRTPAR.T	2.2667	0.0752	631.6	30	23/64
13_1_a.1395.1395.2	NUMBL_HUMAN	1202.65	2	K.SVLWVSADGLR.V	1.9853	0.015	522.6	25	14/20
13_1_a.1396.1396.3	PRD15_HUMAN	1196.48	3	K.EYECKECHR.R	1.3613	0.0607	261.9	4	15/32
13_1_a.1396.1396.2	MYO9B_HUMAN	798.52	2	K.KPAVQKK.K	1.6974	0.096	167	34	38941
13_1_a.1398.1398.1	RAD18_HUMAN	582.397	1	R.KPLPK.T	1.1105	0	162.1	1	38876	3
13_1_a.1399.1399.1	HME1_HUMAN	588.285	1	R.GGAGGGGR.V	1.4888	0.0626	188.1	15	38974
13_1_a.1400.1400.3	C8AP2_HUMAN	1228.74	3	K.KGEIIILWTR.N	1.9569	0.1972	331.4	16	16/36
13_1_a.1400.1400.2	SNPC4_HUMAN	817.416	2	K.QGREAEK.E	2.1712	0.0456	387.4	50	39002
13_1_a.1402.1402.1	Q9H8V8	532.284	1	R.GAAGTR.V	1.0977	0.0167	87.4	26	38847
13_1_a.1403.1403.2	Q32KL0	912.424	2	K.FSALCSER.I	1.1767	0.0842	148.7	393	38974	3
13_1_a.1403.1403.3	ATS14_HUMAN	1369.68	3	K.KGPPLDGTECAPGK.W	1.5919	0.0614	346.9	71	20/52	1
13_1_a.1404.1404.2	ITAL_HUMAN	747.443	2	R.KVEMLK.P	2.2635	0.0106	345.6	10	38970	1
13_1_a.1404.1404.3	Q8NA09	1120.58	3	R.EKVCGTLGWK.G	2.2213	0.0207	299.1	46	15/36	2
13_1_a.1406.1406.2	EI2BE_HUMAN	1200.58	2	K.RSGAGPGGSGGGGAR.G	1.5569	0.0326	628.1	1	18/28	1
13_1_a.1406.1406.3	Q4VC44	1798.91	3	R.HCHPPDLGGLEALRQR.E	1.6116	0.0746	199.9	465	20/60	3
13_1_a.1407.1407.1	Q96KJ4	575.29	1	R.GAGTGGR.G	1.2842	0.0962	141.7	145	38910
13_1_a.1408.1408.2	GUAA_HUMAN	785.524	2	K.KLGIQVK.V	1.9205	0.0632	244.1	21	38972
13_1_a.1408.1408.3	CNTN4_HUMAN	1176.64	3	K.ASPKPVYTWK.K	1.6834	0.0858	103.4	501	13455
13_1_a.1410.1410.3	DNMT1_HUMAN	1267.61	3	K.EELSEEGYLAK.V	1.8125	0.0315	457	19	16/40
13_1_a.1410.1410.2	Q569J0	845.473	2	K.ENKVVEK.A	1.7175	0.0408	372.2	235	38941	1
13_1_a.1411.1411.1	CNTN5_HUMAN	544.284	1	R.PNGTR.G	1.1178	0.1199	87.1	76	38845
13_1_a.1412.1412.2	Q38SD2	1011.57	2	K.RIAFFTTR.G	1.4542	0.0191	221	118	38974
13_1_a.1412.1412.3	Q8TCE1	1516.83	3	R.SLNPNRVTFKANR.P	1.8788	0.1269	595.3	1	22/48
13_1_a.1413.1413.1	TRI14_HUMAN	603.321	1	R.GASAAAR.L	1.6151	0.0278	79.7	282	38910	2
13_1_a.1414.1414.3	S3TC2_HUMAN	1099.59	3	K.AGALLACLPDR.E	2.0345	0.1671	145.2	132	15/40
13_1_a.1414.1414.2	Q6PI77	731.405	2	R.EATGVVR.P	1.9954	0.0294	316.1	5	39002	1
13_1_a.1416.1416.2	MCM5_HUMAN	1265.67	2	K.FGLTTSRGRDR.V	1.5309	0.0074	211.7	153	38980
13_1_a.1416.1416.3	Q6ZR14	1898.86	3	K.LNEYENGEFSFHGDLK.T	1.4192	0.0028	453.1	38	21/60	1
13_1_a.1418.1418.2	Q96LI4	708.367	2	K.EPHTPK.E	1.3932	0.067	81.7	152	38878
13_1_a.1418.1418.3	Q9H8D1	1061.61	3	K.QLAAVYAGLR.A	1.4178	0.0612	164.7	123	14/36
13_1_a.1419.1419.1	CD008_HUMAN	546.288	1	K.EVNGK.Q	1.2418	0.0397	41.5	180	38815
13_1_a.1420.1420.2	BTNL3_HUMAN	1215.65	2	K.GKIQAELDWR.R	1.6735	0.0455	444.3	21	39069	1
13_1_a.1420.1420.3	Q71RE8	1820.89	3	K.SLHDLSCYIFHSRSR.P	1.8887	0.0967	441.6	17	23/56
13_1_a.1421.1421.3	K1576_HUMAN	1225.52	3	K.EPAEGGGGDGSHR.L	1.5429	0.0807	283.8	7	17/48
13_1_a.1421.1421.2	PRI1_HUMAN	815.535	2	R.KGELLKK.S	1.5719	0.0019	312.5	19	38972
13_1_a.1422.1422.3	Q5IBP1	1358.73	3	R.KLLEEEEKNAR.L	1.3341	0.0217	327.5	130	16/40	3
13_1_a.1422.1422.2	Q6ZV75	906.552	2	K.SIHPLALR.P	1.0838	0.096	184.9	105	38943	1
13_1_a.1423.1423.2	ENPP1_HUMAN	1292.54	2	R.DGCAGGGSRGGEGGR.A	1.5593	0.0339	156.7	62	15/28
13_1_a.1423.1423.3	OSR2_HUMAN	1937.95	3	R.MQSVAAFAVSAVASQWER.T	1.6494	0.0027	110.6	544	20/68
13_1_a.1424.1424.1	CAZA2_HUMAN	510.274	1	R.ICFK.F	1.04	0	123.7	4	38843	1
13_1_a.1429.1429.3	TR11B_HUMAN	1568.92	3	K.PSDQILKLLSLWR.I	1.6058	0.0053	379.2	28	18/48
13_1_a.1429.1429.2	Q702N8	1045.53	2	R.EEIQSNAVR.S	1.7459	0.0233	288.1	59	39037
13_1_a.1430.1430.3	Q6NUI3	1142.7	3	R.EAVRRLLASK.C	1.7294	0.1301	328.6	5	17/36
13_1_a.1430.1430.2	Q6XYD6	761.368	2	K.EAGLDEK.G	1.7341	0.0287	233.4	113	38941
13_1_a.1431.1431.2	SFRS4_HUMAN	935.49	2	K.RDSKAGSSK.K	1.4781	0.0936	520.1	1	13/16
13_1_a.1431.1431.3	PDGFA_HUMAN	1402.74	3	R.SIEEAVPAVCKTR.T	1.5696	0.2031	285.3	71	18/48	1
13_1_a.1432.1432.2	GRIA1_HUMAN	822.385	2	R.KPCDTMK.V	1.6357	0.0191	193.7	39	38972	4
13_1_a.1432.1432.3	IRK11_HUMAN	1231.63	3	R.FVPIVAEEDGR.Y	1.5046	0.0139	126.7	204	14/40
13_1_a.1434.1434.3	SYYC_HUMAN	1609.82	3	K.GPAKNSEPEEVIPSR.L	1.6966	0.0643	102.7	915	20790
13_1_a.1434.1434.2	MARCS_HUMAN	1074.55	2	K.TAAKGEAAAER.P	1.6422	0.0352	387.6	12	13/20
13_1_a.1436.1436.2	Q68CN7	1340.7	2	R.HWSSLVYHRR.L	1.713	0.0129	56.8	560	38916
13_1_a.1436.1436.3	Q8NDA2	2012.18	3	K.DFVVAVLVAPRIRSSGVAR.E	1.7784	0.1641	187.7	40	22/72
13_1_a.1438.1438.2	Q6EBC4	1027.5	2	R.ASCSFFLPR.I	1.2724	0.0123	249.3	58	39006	2
13_1_a.1438.1438.3	FGD6_HUMAN	1541.84	3	K.TSPVREIGQSPSRK.I	1.8507	0.0368	173.8	645	17/52
13_1_a.1439.1439.3	CF152_HUMAN	1093.65	3	R.KPSPKGLPNR.K	1.2983	0.0139	186.1	77	15/36
13_1_a.1439.1439.2	NK3R_HUMAN	728.453	2	K.KRATPR.D	1.6362	0.099	224.4	51	38939
13_1_a.1440.1440.3	ECM1_HUMAN	1872.84	3	R.DECFARRAPYPNYDR.D	1.0598	0.0719	143.1	748	14/56	2
13_1_a.1440.1440.2	CO1A1_HUMAN	1248.55	2	R.GDKGETGEQGDR.G	2.319	0.3513	964.7	1	16/22
13_1_a.1442.1442.1	K0853_HUMAN	566.278	1	K.SSSASK.K	1.0064	0.0151	165.8	6	38908
13_1_a.1443.1443.2	Q5THU6	794.404	2	K.EGLSFNK.L	1.2614	0.1504	210.3	9	38941	1
13_1_a.1443.1443.3	Q6NUK7	1193.61	3	R.AGNMGCIKSKGK.D	1.4264	0.0086	99.6	262	13/44
13_1_a.1444.1444.3	MACF4_HUMAN	1854.1	3	K.LLPVKQLAGGMVSLKSGR.K	1.7523	0.0391	224.8	98	22/68	1
13_1_a.1444.1444.2	Q6P4C1	1236.66	2	R.SSALNQFTLQK.K	1.6416	0.0598	307.1	2	13/20
13_1_a.1445.1445.3	GLIS1_HUMAN	1351.73	3	R.SPPLAGDLGGPSKR.A	1.4915	0.0685	751.5	3	26/52
13_1_a.1445.1445.2	Q4G0Z0	902.517	2	R.SKARTPSR.V	1.1729	0.0715	210.2	167	38943
13_1_a.1446.1446.2	RB22A_HUMAN	997.554	2	R.RQPSEPKR.S	1.7288	0.0899	213.9	24	39035
13_1_a.1446.1446.3	Q6ZSC9	1495.77	3	R.QNQERPNPSAKAR.M	1.3955	0.151	183.4	73	17/48
13_1_a.1447.1447.3	Q86YR7	1436.76	3	K.PSQRQIYLFER.G	1.5706	0.0572	151.8	779	15/40
13_1_a.1447.1447.2	S12A5_HUMAN	956.538	2	R.RKNPANTR.L	1.3053	0.0549	188.1	87	38974
13_1_a.1448.1448.1	PDK3_HUMAN	568.345	1	K.QPVPK.Q	1.016	0	79.5	26	38845
13_1_a.1450.1450.2	DDX49_HUMAN	928.583	2	R.KQLILEGK.D	1.322	0.0297	183.8	46	38974
13_1_a.1450.1450.3	TSG6_HUMAN	1390.78	3	K.TGIIDYGIRLNR.S	1.6711	0.0778	245.2	52	17/44
13_1_a.1451.1451.2	Q68DD1	1042.55	2	K.PPHAHNLTR.G	1.4361	0.0467	124.7	648	38945
13_1_a.1451.1451.3	MGR5_HUMAN	1564.75	3	K.SNIIRSVCSEPCEK.G	1.6727	0.0767	413.8	34	23/52
13_1_a.1452.1452.2	SAMD9_HUMAN	812.466	2	R.KVAGYFK.K	1.7471	0.004	242.2	69	38972
13_1_a.1452.1452.3	SLBP_HUMAN	1216.68	3	R.QPGIHPKTPNK.F	1.9036	0.1247	188.2	193	14/40
13_1_a.1453.1453.3	TMC1_HUMAN	1057.66	3	K.KIEVLKEAK.K	1.4773	0.0026	224.9	175	14/32	1
13_1_a.1453.1453.2	PCDA2_HUMAN	706.319	2	R.EELCGR.S	1.5074	0.0044	230.3	46	38970	7
13_1_a.1454.1454.3	MY18A_HUMAN	2566.29	3	R.LFSYYGPQEGDKKGQSPLLHSSK.P	1.442	0.2459	276.9	11	23/88	1
13_1_a.1454.1454.2	Q6IAA8	1709.94	2	R.EERKLLLDPSSPPTK.A	1.2498	0.1586	195.4	14	39049
13_1_a.1455.1455.3	UCN3_HUMAN	1906.02	3	K.NLRAQAAANAHLMAQIGR.K	1.3779	0.1316	130.2	320	15/68	1
13_1_a.1455.1455.2	GCFC_HUMAN	1271.7	2	R.ALYQEHAKRR.I	1.1964	0.0797	140.6	110	38947
13_1_a.1456.1456.2	K0934_HUMAN	1311.65	2	R.SACLMTTQLICK.L	1.9268	0.0311	56.6	673	38982
13_1_a.1456.1456.3	CCNE2_HUMAN	1967.96	3	K.EIGTSDFSRFTNYRFK.N	1.6644	0.0132	87.9	900	18/60
13_1_a.1458.1458.3	NELL2_HUMAN	1213.52	3	R.EFESWIDGCK.N	1.6852	0.0528	89.3	470	13455
13_1_a.1458.1458.2	ILRL2_HUMAN	808.504	2	K.QILHLGK.D	1.9947	0.1358	215.3	17	39002	1
13_1_a.1459.1459.2	DGC14_HUMAN	1289.7	2	R.ALRASYTPSPAR.S	1.4559	0.0568	307.9	36	39043
13_1_a.1459.1459.3	Q9UHA8	1934.03	3	R.GSGTNGYVQRNLSLVRGR.R	1.6943	0.1811	190.9	301	18/68
13_1_a.1460.1460.3	SETX_HUMAN	1288.72	3	R.AEDQIKISTRK.Q	1.8304	0.0808	269	151	15/40
13_1_a.1460.1460.2	MYO5B_HUMAN	859.5	2	K.GATLTLQR.Y	1.9649	0.016	382.8	11	39004
13_1_a.1462.1462.3	Q6ZQX7	1709.97	3	R.GSRLPPITGGASELAKR.K	1.0742	0.0288	265.1	120	22/64
13_1_a.1463.1463.3	Q9NU23	1079.6	3	R.KYLKDWAR.E	1.8491	0.0463	232.2	104	13/28
13_1_a.1463.1463.2	PRP4B_HUMAN	719.339	2	K.EGMSPAK.R	1.507	0.0008	115.4	566	38910
13_1_a.1466.1466.2	Q6IAA8	1709.94	2	R.EERKLLLDPSSPPTK.A	1.46	0.1493	200.6	18	39049
13_1_a.1466.1466.3	TTC13_HUMAN	2564.34	3	R.RIADPDQPVLWLDQMPARSLSR.G	1.2623	0.0213	237.2	19	23/84	1
13_1_a.1467.1467.1	Q9H6A9	585.31	1	R.GAAGGPR.K	1.2395	0.053	65.3	138	38880
13_1_a.1468.1468.3	Q3MIR7	1928.95	3	K.TYDTYVGIGWLIPGMDK.G	1.488	0.0405	100.5	677	16/64
13_1_a.1468.1468.2	JARD2_HUMAN	1286.69	2	K.GRSVSLTTFYR.T	1.6119	0.0311	129.1	185	39041
13_1_a.1469.1469.1	SPTN2_HUMAN	674.347	1	K.ELAGER.R	1.0378	0.0111	28.6	383	38817
13_1_a.1471.1471.3	PRGC1_HUMAN	1449.72	3	K.GPEQSELYAQLSK.S	1.1913	0.0111	252.4	5	17/48
13_1_a.1471.1471.2	GCN1L_HUMAN	966.525	2	K.KQVFTSEK.F	1.4132	0.1295	335.6	3	39035
13_1_a.1472.1472.1	TOP2A_HUMAN	542.341	1	K.RAAPK.G	1.115	0.1035	62.9	18	38845	2
13_1_a.1474.1475.3	IDS_HUMAN	1241.71	3	R.EGKNLLKHFR.F	1.6572	0.102	130	483	13424
13_1_a.1474.1475.2	H2BA_HUMAN	828.421	2	K.HAVSEGTK.A	1.4244	0.0641	146.9	154	38912	16
13_1_a.1476.1476.2	Q8N719	976.492	2	R.DGSGGSRGKR.E	1.7988	0.0079	265.1	133	13/18	1
13_1_a.1476.1476.3	Q8NA31	1464.68	3	K.ACTNDDQMKTPLK.S	2.1634	0.0253	307.1	208	20/48
13_1_a.1477.1477.3	CO9A3_HUMAN	1882.98	3	K.GDPGPPGPAGLPGSVGLQGPR.G	1.4081	0.009	192.2	283	23/80	1
13_1_a.1477.1477.2	Q9Y592	1255.75	2	K.EKLQRAAIAQK.K	1.4956	0.0512	187.6	106	39071
13_1_a.1478.1478.3	FUS_HUMAN	1148.57	3	R.GGFRGGRGGGDR.G	1.5805	0.0567	268.9	13	18/44	1
13_1_a.1478.1478.2	Q6ZNE1	765.389	2	K.EVYQAR.V	1.643	0.0804	189.2	102	38908
13_1_a.1479.1479.1	CO4A_HUMAN	577.294	1	K.DSLSR.T	1.2826	0	209.9	22	38906	7
13_1_a.1482.1482.1	DDR2_HUMAN	518.257	1	R.ADANK.N	1.5143	0.0169	233.3	32	38876	2
13_1_a.1483.1483.3	VRK3_HUMAN	1249.69	3	K.FSLKLDAKDGR.L	1.8579	0.0717	535.3	42	18/40
13_1_a.1483.1483.2	DIP2_HUMAN	832.46	2	R.VAAALMEK.G	1.5136	0.0658	278.4	403	38943
13_1_a.1484.1484.3	Q9HCH1	1137.7	3	K.KLIVEGHLTK.A	1.7305	0.086	231.9	1	15/36
13_1_a.1484.1484.2	Q6ZSQ5	757.432	2	R.GAVGLGGAR.S	1.9589	0.1444	251.6	4	39037
13_1_a.1485.1485.3	FKBP6_HUMAN	1875.99	3	R.PTIALCYGEQALIIDQK.N	1.1457	0.0121	241.2	148	17/64
13_1_a.1485.1485.2	TAU_HUMAN	1250.77	2	K.PVSRVPQLKAR.M	1.4191	0.0889	282	21	39010	1
13_1_a.1486.1486.2	TULP4_HUMAN	1320.69	2	R.DGFVLVGSVSGQR.H	1.3472	0.0165	152	100	14/24	1
13_1_a.1486.1486.3	IL18_HUMAN	1981.84	3	R.PLFEDMTDSDCRDNAPR.T	1.7741	0.0988	248.3	10	24/64
13_1_a.1487.1487.2	SFRS1_HUMAN	1227.59	2	R.GTGRGGGGGGGGGAPR.G	1.4366	0.0619	185.4	63	14/30	1
13_1_a.1487.1487.3	ZF161_HUMAN	1842.81	3	R.EQIACQACGKTFSDEGR.L	1.8285	0.0664	329.5	20	28/64
13_1_a.1490.1490.1	Q6PI26	517.334	1	K.SAVLK.C	1.3117	0.0021	160	59	38876	5
13_1_a.1491.1491.3	Q6PI96	1211.54	3	K.QEFSSDEEIK.K	1.5983	0.0131	197.3	36	15/36	1
13_1_a.1491.1491.2	Q6P2S7	807.509	2	R.KSLFGKK.N	2.2466	0.0824	201.5	95	38972
13_1_a.1492.1492.3	PHS1_HUMAN	1624.8	3	R.DFNVGDYIQAVLDR.N	1.831	0.0611	152.6	375	16/52
13_1_a.1492.1492.2	DNJCD_HUMAN	1083.63	2	R.NNAIPKSAIR.V	1.5502	0.0584	155.4	176	39039
13_1_a.1495.1495.3	Q6ZU35	1583.79	3	R.DQLRPGDESTPRGR.C	1.4143	0.0434	217.1	455	17/52
13_1_a.1495.1495.2	Q13745	1055.58	2	-.EGEGKGPLLR.T	1.1403	0.0621	119.8	382	38978
13_1_a.1496.1496.2	TKT_HUMAN	755.38	2	K.LGHASDR.I	1.7822	0.2104	273.6	8	38941
13_1_a.1496.1496.3	Q3MJF0	1134.61	3	R.LGLGTISGSSSR.S	1.5442	0.1322	99.4	377	16407
13_1_a.1498.1498.2	CECR2_HUMAN	1104.53	2	K.RKEEEEER.Q	2.1251	0.0463	801.7	1	13/14
13_1_a.1498.1498.3	Q5TZA0	1657.9	3	R.ERRATLDQVATLER.S	1.3421	0.0043	129.4	491	14/52	1
13_1_a.1499.1499.3	KAD7_HUMAN	1607.98	3	R.LAIKQLIKEIGEPR.N	1.7677	0.0589	199.5	277	16/52
13_1_a.1499.1499.2	HMG1X_HUMAN	1072.59	2	K.FKDPNAPKR.T	1.8459	0.0143	218	113	39037	9
13_1_a.1500.1500.3	BMPER_HUMAN	1577.8	3	K.ILNRKGCCPICTEK.P	1.5364	0.0093	271.2	179	20/52
13_1_a.1500.1500.2	SPAST_HUMAN	1052.5	2	K.EQAVEWYK.K	1.1782	0.0533	182.1	87	39004
13_1_a.1501.1501.2	O15102	875.477	2	R.CKITPSAR.K	1.476	0.0449	230.1	175	38974	5
13_1_a.1501.1501.3	Q9NZY6	1311.72	3	K.VLESCLKLGGHR.A	1.6476	0.1616	267.5	194	16/44
13_1_a.1502.1502.2	L10K_HUMAN	1018.53	2	K.TAAAASEKNR.G	1.6912	0.0649	125.9	556	39039
13_1_a.1502.1502.3	Q5T992	1527.81	3	R.TSLSVDQAPTPKAGR.S	1.5599	0.0391	186.4	111	18/56
13_1_a.1503.1503.1	IF3A_HUMAN	555.325	1	K.SHLAK.E	1.0962	0.0781	101	6	38845	2
13_1_a.1506.1506.2	MY18B_HUMAN	745.409	2	R.EVQELK.S	1.5946	0.0147	388.6	9	38939
13_1_a.1506.1506.3	PLEC1_HUMAN	1117.56	3	R.QVQDESQRK.R	1.7027	0.0285	169.1	962	11963	8
13_1_a.1507.1507.3	Q7Z714	1171.68	3	K.QLQQGIFPIK.N	1.6898	0.0401	267	174	13/36
13_1_a.1507.1507.2	Q96RW0	781.377	2	R.QMIMMK.K	2.0594	0.1391	499.7	12	38970	8
13_1_a.1508.1508.3	Q8NBR0	1073.58	3	R.QPSSSGAKRR.R	2.1517	0.1658	145.8	420	14/36
13_1_a.1508.1508.2	ING1_HUMAN	714.389	2	K.AGADRPK.G	1.9959	0.0207	241.7	22	39002	1
13_1_a.1509.1509.3	RABE1_HUMAN	1673.78	3	K.DQEDDEQQRLNKR.K	1.9222	0.0738	358.8	17	19/48
13_1_a.1509.1509.2	RPGR_HUMAN	1116.6	2	K.KEKANLEER.A	1.806	0.0502	362.2	10	39067	1
13_1_a.1510.1510.3	WDR33_HUMAN	1736.86	3	R.GPHPPGGLLGHGPQEMR.G	1.8405	0.0728	335.1	30	22/64
13_1_a.1510.1510.2	Q8NCU7	1156.62	2	R.RSGDWLLPGR.A	2.0962	0.0125	362	28	14/18
13_1_a.1512.1512.2	Q9BSB4	776.408	2	R.QICREK.V	2.1794	0.0007	250.1	75	38970
13_1_a.1512.1512.3	Q7Z3N3	1165.58	3	K.QQYDIEITR.I	2.4214	0.0981	263.1	59	15/32	1
13_1_a.1514.1514.3	FBRL_HUMAN	1396.79	3	K.RTNIIPVIEDAR.H	1.778	0.0517	121.8	118	16/44
13_1_a.1514.1514.2	Q29831	931.416	2	-.RTCDHSGR.V	1.492	0.0306	108	160	38974
13_1_a.1516.1516.3	O00568	1607.89	3	-.MKQLPVLEPGDKPR.K	2.0083	0.0217	643.2	1	25/52	2
13_1_a.1516.1516.2	BTBD6_HUMAN	1072.64	2	R.QTLEIIVTR.E	1.6178	0.0245	253.8	69	39067	1
13_1_a.1517.1518.3	Q8WYA3	1502.76	3	-.MAAEEEAAAGGKVLR.E	2.1568	0.0714	291.9	117	20/56	2
13_1_a.1517.1518.2	Q4QQG7	1001.6	2	R.EKLLETLR.A	2.0625	0.0487	333.1	74	39035	2
13_1_a.1519.1519.2	RBM28_HUMAN	1276.63	2	K.AAEGVSAADMAKR.E	1.5911	0.1887	136.2	586	38953
13_1_a.1519.1519.3	ATS3_HUMAN	1914.94	3	K.MSLSSISSVGGPNAYAAFR.P	1.3658	0.031	589.9	4	26/72
13_1_a.1520.1520.3	Q5TH69	1181.65	3	K.EASGSKYKAIK.E	2.002	0.0207	124.8	167	14/40
13_1_a.1520.1520.2	ATP4A_HUMAN	787.453	2	K.KAGGGGGKR.K	1.7969	0.0044	274.8	3	39067
13_1_a.1523.1523.2	RP1L1_HUMAN	1181.6	2	K.TPSGPGRPQER.N	1.919	0.1297	94	495	39010
13_1_a.1523.1523.3	M3KL4_HUMAN	1771.97	3	R.ALAAANAAPDPRAPGPRR.A	2.2202	0.133	349.7	9	24/68
13_1_a.1524.1524.1	Q9H0C8	573.31	1	K.AGGNVR.D	1.2104	0.0282	145.6	29	38908
13_1_a.1525.1525.3	Q8NAK5	1387.7	3	R.VGQPALDSACLSAR.V	2.1076	0.0681	321.7	3	20/52
13_1_a.1525.1525.2	VANG2_HUMAN	924.574	2	R.RPKASLPR.V	1.7954	0.0633	222.9	32	38974
13_1_a.1526.1526.2	LRRC6_HUMAN	724.483	2	K.KVKPPR.T	1.526	0	228.5	154	38908
13_1_a.1526.1526.3	KCD13_HUMAN	1086.58	3	R.ELGELLGEAR.Y	1.7139	0.0067	183.5	565	13485
13_1_a.1528.1528.3	Q5VTK7	1782.93	3	K.EDELSLAPGDVVRQVR.W	1.7642	0.0265	360.4	62	23/60
13_1_a.1528.1528.2	R51A1_HUMAN	1188.68	2	R.SSSSPLVVVSVK.S	2.0864	0.1625	463.1	2	16/22
13_1_a.1530.1530.2	K0934_HUMAN	1261.61	2	R.RTELTDANGER.H	1.3599	0.0648	314.8	11	39010
13_1_a.1530.1530.3	MYOC_HUMAN	1894.03	3	R.TVIRYELNTETVKAEK.E	1.4564	0.0316	170.3	332	16/60	1
13_1_a.1531.1531.3	DYH9_HUMAN	1523.67	3	R.HEMTEGVTAYEEK.P	1.6	0.056	145.1	535	15/48
13_1_a.1531.1531.2	Q8NF40	1014.59	2	R.ELLSVGLQR.R	1.7792	0.0724	129.4	672	38945
13_1_a.1533.1533.3	OPCM_HUMAN	1417.75	3	R.LATGLDGMRIENK.G	1.8002	0.0745	213	270	14/48	1
13_1_a.1533.1533.2	KLHL5_HUMAN	945.486	2	R.GQTGANGGRK.F	1.73	0.0213	792.1	1	15/18	1
13_1_a.1535.1535.3	Q9BQ75	1069.51	3	R.SMTAFRGDGK.V	1.4298	0.0427	238.7	188	13485
13_1_a.1535.1535.2	UBP28_HUMAN	712.399	2	K.EPPTIR.P	1.5977	0.0178	262.1	66	38939
13_1_a.1536.1536.3	O60284	1116.54	3	K.EEKEDPELK.C	1.9086	0.0068	418.3	9	17/32
13_1_a.1536.1536.2	Q5TG08	744.473	2	K.KALREK.T	1.5006	0.0222	164	163	38939	1
13_1_a.1538.1538.1	Q8IUT9	531.288	1	K.EGGIR.G	1.3242	0	212.5	2	38906	2
13_1_a.1539.1539.2	CELR2_HUMAN	1401.67	2	K.ESSGNGAPEERLR.E	1.6556	0.0507	136.3	84	13/24
13_1_a.1539.1539.3	FYN_HUMAN	2104.13	3	R.QGAKFPIKWTAPEAALYGR.F	1.4791	0.1233	141.2	264	20/72	6
13_1_a.1543.1543.2	Q53T94	801.519	2	R.KEKGIVK.M	1.5181	0.0043	84.4	382	38880
13_1_a.1543.1543.3	Q4FZB7	1201.63	3	R.REDQSLRLNA.-	1.91	0.0072	151.5	241	13/36
13_1_a.1544.1544.2	EDD1_HUMAN	1205.63	2	K.ELQNKYTPGR.R	1.8192	0.0297	458.3	24	13/18
13_1_a.1544.1544.3	OGFR_HUMAN	1809.85	3	R.EQPPTEPGPQSASEVEK.I	1.69	0.1042	815.9	1	28/64	1
13_1_a.1546.1546.3	Q5JVM6	1263.62	3	K.ELSKGNTFCHK.G	1.2973	0.0392	140.4	452	14946
13_1_a.1546.1546.2	Q8TCJ2	842.4	2	K.HATEQEK.T	1.6533	0.1929	634.5	1	39033
13_1_a.1547.1547.2	BC11B_HUMAN	987.468	2	K.QENIAGPCR.P	1.6349	0.0206	352	21	39037
13_1_a.1547.1547.3	DHSA_HUMAN	1482.77	3	R.GVIALCIEDGSIHR.I	1.3722	0.0469	276.4	65	19/52
13_1_a.1549.1549.2	ECE2_HUMAN	924.501	2	R.RNPLPDGR.S	1.3042	0.0154	160	182	38943	1
13_1_a.1549.1549.3	Q9Y402	1383.74	3	K.RTGAPGAFHRWK.V	1.7124	0.0524	348.6	23	18/44
13_1_a.1550.1550.1	DYN3_HUMAN	649.334	1	R.VTGMNK.G	1.0713	0.028	129.5	41	38908	2
13_1_a.1551.1551.1	KI3L3_HUMAN	621.281	1	R.WCANK.K	1.1349	0.0445	145.6	13	38876	1
13_1_a.1552.1552.3	CLPX_HUMAN	1837.96	3	K.NEKYLGFGTPSNLGKGR.R	1.3757	0.0754	351.7	39	21/64
13_1_a.1552.1552.2	KCNKH_HUMAN	1226.71	2	K.LILSQLETPGR.V	1.4314	0.0286	123.2	397	38980
13_1_a.1554.1554.2	MED12_HUMAN	806.389	2	R.QSDSLEK.V	2.085	0.0777	445.1	4	39002
13_1_a.1554.1554.3	Q9ULE4	1208.59	3	K.QQYEEDLRK.I	1.8593	0.0126	284.2	26	14/32
13_1_a.1556.1556.3	K0690_HUMAN	1415.85	3	K.LQGQFKGLVKAAR.R	1.5234	0.0161	183.6	353	19/48
13_1_a.1556.1556.2	S12A5_HUMAN	944.546	2	R.VMLVRGGGR.E	1.3351	0.0326	161.2	319	39006
13_1_a.1557.1557.2	Q86YA3	1193.65	2	K.RKFTGFQGPR.Q	1.7317	0.1036	247.7	53	39008	1
13_1_a.1557.1557.3	TYY1_HUMAN	1791.86	3	K.KSYLSGGAGAAGGGGADPGNK.K	1.4227	0.0307	338.7	24	21/80
13_1_a.1558.1558.1	RAN_HUMAN	549.314	1	K.FGGLR.D	1.1674	0	156.5	21	38876
13_1_a.1559.1559.3	Q6ZU56	1261.68	3	R.KTEIPFDLGNK.I	1.4515	0.004	162	201	15/40	2
13_1_a.1559.1559.2	XYLT1_HUMAN	840.505	2	K.KPPSRQK.E	1.6242	0.1005	212.7	33	38941
13_1_a.1560.1560.1	ARFG1_HUMAN	517.273	1	K.AGGNAK.F	1.2745	0.0011	348.1	1	38939	1
13_1_a.1563.1563.3	POT14_HUMAN	1432.73	3	R.HNVICQLLSDYK.E	1.7158	0.0446	226.1	235	15/44
13_1_a.1563.1563.2	CN092_HUMAN	955.484	2	K.KDPNEPQK.P	1.5169	0.0008	252.3	30	39004	3
13_1_a.1564.1564.2	Q9H8U1	908.579	2	K.LRAPKAPR.T	1.4352	0.064	152.5	311	38943
13_1_a.1564.1564.3	Q7Z4Y3	1363.68	3	R.SPQEALHTPMPR.M	1.6236	0.0824	228.6	353	16/44
13_1_a.1565.1565.2	BIG1_HUMAN	792.41	2	R.EGSLTGTK.D	1.9916	0.0007	445.6	2	39035
13_1_a.1565.1565.3	PARP1_HUMAN	1189.62	3	K.EEGINKSEKR.M	2.0128	0.0282	310.3	21	15/36
13_1_a.1566.1566.3	CO7A1_HUMAN	1321.69	3	K.GDKGDPGVGLPGPR.G	2.139	0.0985	253.6	54	20/52
13_1_a.1566.1566.2	KI67_HUMAN	882.527	2	K.RQPRTPK.G	1.3151	0.1342	112.1	504	38972	1
13_1_a.1567.1567.1	Q13876	619.316	1	R.NGSVSR.V	1.1852	0.0203	74	339	38878	2
13_1_a.1568.1568.3	TTC9_HUMAN	1276.69	3	K.FREAIGKYHR.A	1.8506	0.0037	641	19	21/36	2
13_1_a.1568.1568.2	MY18A_HUMAN	849.472	2	R.RATSMRK.T	1.3843	0.0605	119.3	857	38910	1
13_1_a.1570.1570.3	MN1_HUMAN	1439.71	3	R.QNSLPACAPSAPAGR.G	1.5445	0.0169	280.2	20	20/56
13_1_a.1570.1570.2	Q6ZUA3	959.578	2	R.RSFALLPR.L	1.786	0.2002	245.5	37	39004
13_1_a.1571.1571.3	Q5T925	1588.89	3	K.ACISEILPSKFKPR.L	1.7961	0.0494	201.1	390	16/52
13_1_a.1571.1571.2	Q6ZN84	1059.57	2	R.RDLQMLQR.T	1.6319	0.0045	368.2	17	39035	1
13_1_a.1573.1573.3	RPOM_HUMAN	1912.03	3	R.QRVSGQVQALQNHYRK.Y	1.2102	0.0064	297.9	105	19/60
13_1_a.1573.1573.2	Q9UL03	1274.67	2	K.LSQQAKIESDR.V	1.2849	0.0344	238.4	188	39010
13_1_a.1574.1574.3	Q9P281	1108.64	3	R.KEALSFSKAK.E	1.6734	0.0713	362.6	1	17/36
13_1_a.1575.1575.2	CLK2_HUMAN	1126.52	2	R.ENSSYRSQR.S	1.4749	0.02	362.8	10	39067	2
13_1_a.1575.1575.3	Q8NDR0	1690.86	3	R.GGLLGAWRGKGCCSLGR.G	1.3825	0.0414	281.2	63	23/64
13_1_a.1576.1576.3	Q8IY82	1257.69	3	K.KQQEIRAQEK.K	1.96	0.0094	242.5	210	15/36	1
13_1_a.1576.1576.2	Q5VSM2	838.551	2	K.KPIPGAKK.L	1.7837	0.0411	183.3	141	38943
13_1_a.1578.1578.2	Q9H5V9	726.414	2	K.QEPPKK.V	1.5856	0	247.9	28	38939
13_1_a.1578.1578.3	FBX18_HUMAN	1091.62	3	K.KLPITYSNR.K	1.4318	0.0757	123.8	282	12024	1
13_1_a.1579.1579.2	NONO_HUMAN	736.362	2	R.QQEGFK.G	1.1914	0.0026	243.4	3	38939	2
13_1_a.1579.1579.3	CSE1_HUMAN	1105.55	3	R.GSNTIASAAADK.I	1.386	0.0174	290.5	2	17/44
13_1_a.1580.1580.3	DDX27_HUMAN	1281.63	3	K.EIIRMCSHHR.Q	1.3955	0.006	375.2	13	15/36
13_1_a.1580.1580.2	NODAL_HUMAN	856.454	2	K.RYQPHR.V	1.5354	0.1144	307.6	16	38908
13_1_a.1581.1581.2	PLCB1_HUMAN	986.483	2	K.FESFEISK.K	1.4592	0.0857	333.9	12	39035	2
13_1_a.1581.1581.3	RBM6_HUMAN	1479.68	3	R.DREKESWSGETR.Q	1.4031	0.0229	266.1	107	17/44
13_1_a.1582.1582.1	Q13018	716.43	1	K.KKDTPK.Q	1.5217	0.0127	172	4	38939	1
13_1_a.1583.1583.3	Q8N9K8	1347.7	3	K.NTAQVGASSQTRK.P	1.1885	0.0188	294	31	21/48
13_1_a.1583.1583.2	MAGD4_HUMAN	899.517	2	R.AARAAAAAAR.T	1.0548	0.0943	231.3	2	39039	1
13_1_a.1584.1584.2	Q6Y2K9	941.505	2	K.ETHGVTVAK.D	1.4593	0.0902	55.5	932	38914
13_1_a.1584.1584.3	Q96AT1	1411.78	3	K.EDEQPQVVVLKK.G	1.4504	0.0285	261.4	16	17/44
13_1_a.1586.1586.3	Q76KD6	1486.76	3	K.SMMEVERKLAHR.K	1.6183	0.0939	197	127	16/44
13_1_a.1586.1586.2	K1C18_HUMAN	992.49	2	K.VVSETNDTK.V	1.4691	0.0524	133.6	269	38945
13_1_a.1587.1587.3	Q8WV53	1279.66	3	R.KYDEELGKAAR.F	1.1746	0.0587	467.5	15	18/40	1
13_1_a.1587.1587.2	O14827	854.437	2	R.GEHLVDGK.S	1.0359	0.0002	221.8	35	38943
13_1_a.1588.1588.2	HAIR_HUMAN	698.431	2	R.AGPGLRK.G	1.8208	0.039	410.7	32	38972
13_1_a.1588.1588.3	Q6ZTS1	1050.57	3	R.SHSVPAPSIR.K	1.554	0.0747	402.9	9	15/36	1
13_1_a.1589.1589.3	Q6ZV77	1309.81	3	K.EAVLPRLRVTR.P	1.8037	0.0837	256.2	342	16/40
13_1_a.1589.1589.2	PCNT_HUMAN	873.527	2	R.AAVTLRSR.I	1.3438	0.0547	395.4	15	39035
13_1_a.1590.1590.3	RPGF2_HUMAN	1237.7	3	K.HFIKIALHCR.E	1.8001	0.0397	200.6	83	15/36	3
13_1_a.1590.1590.2	LMBL3_HUMAN	824.499	2	K.QGLPPKGK.K	1.4787	0.0808	198.5	13	38974
13_1_a.1591.1591.1	CO5A1_HUMAN	584.315	1	R.GPTGPR.G	1.3151	0.0422	96.1	5	38908	6
13_1_a.1592.1592.3	DIDO1_HUMAN	1157.69	3	R.EEISLAKLVR.L	2.2868	0.0767	632	1	21/36	1
13_1_a.1592.1592.2	NFH_HUMAN	772.42	2	K.EAAPEKK.D	1.761	0.0106	327.8	50	39002	1
13_1_a.1594.1594.2	SK2L2_HUMAN	779.354	2	R.QMCQAAK.A	1.5626	0.0445	195.4	118	38972
13_1_a.1594.1594.3	Q5D862	1169.49	3	K.LGSSCSGSGDSGR.R	1.6805	0.0278	165.9	150	16/48
13_1_a.1595.1595.2	Q8N8C9	1336.68	2	R.QCDRFPKLSSR.G	1.784	0.0339	98.7	102	39010
13_1_a.1595.1595.3	DUS10_HUMAN	2005.05	3	K.SHIQGAVHINCADKISRR.R	1.5285	0.1558	169.4	78	23/68
13_1_a.1596.1596.3	Q4KN68	1309.59	3	R.EWHNEDLNPR.M	1.9334	0.0783	236.1	444	14/36
13_1_a.1596.1596.2	PDE4C_HUMAN	872.458	2	R.ERDLSPR.P	1.7882	0.0319	263.6	409	38972
13_1_a.1597.1597.2	CD2A2_HUMAN	987.523	2	R.PRHSHPTR.A	1.1217	0.0028	220.1	97	38974
13_1_a.1597.1597.3	TMF1_HUMAN	1478.84	3	K.HIENLQSQLKLR.E	1.4502	0.0723	298	101	18/44
13_1_a.1598.1598.2	GLI2_HUMAN	1217.69	2	R.LPSPGLHGQRR.M	1.5299	0.1996	392.3	8	13/20	1
13_1_a.1598.1598.3	I10R2_HUMAN	1826.8	3	K.QNPGDSCSLGTPPGQGPQS.-	1.7312	0.0536	416.8	19	23/72
13_1_a.1599.1599.2	Q96S34	1123.62	2	K.EGAAAPQPKVR.L	1.6175	0.2262	553.6	1	16/20
13_1_a.1599.1599.3	ACO11_HUMAN	1685.86	3	R.SVTLPTHRETPEYR.R	1.4383	0.0695	446.5	35	22/52
13_1_a.1600.1600.2	Q86W44	1143.7	2	R.EAIIVGSIITK.C	1.3053	0.0412	281.7	2	13/20
13_1_a.1600.1600.3	Q8TF30	1715.91	3	R.RVVALEKEAEEWTR.R	1.6727	0.0651	194.4	365	17/52
13_1_a.1602.1602.3	Q8NAR9	1054.59	3	K.ERGGRNIPR.V	1.448	0.0371	217.4	75	13/32
13_1_a.1602.1602.2	Q6ZQQ3	703.352	2	R.EGGVWR.P	1.8163	0.1315	535.8	1	39000	5
13_1_a.1603.1603.2	Q969M2	768.484	2	R.KKSHLR.A	1.7394	0.0416	251.5	35	38939
13_1_a.1603.1603.3	Q5JY13	1152.64	3	R.ELEKLHLDR.N	1.7602	0.0968	143.3	389	11994
13_1_a.1604.1604.1	Q6ZNJ1	583.331	1	R.LTGHR.V	1.0649	0.0212	57.8	23	38845
13_1_a.1605.1605.3	Q6ZN24	1295.69	3	R.RQARPPDASAAR.G	1.389	0.0086	385.2	29	19/44
13_1_a.1605.1605.2	Q8TBZ2	862.438	2	R.ESGSQKAR.V	1.4613	0.0493	242.7	197	39004
13_1_a.1606.1606.3	ETFB_HUMAN	1128.7	3	R.VLAKLAEKEK.V	1.3453	0.0517	105.2	748	13455	1
13_1_a.1606.1606.2	Q8N2I6	753.4	2	K.RFSTSR.Q	1.6443	0.0523	170.6	80	38908	1
13_1_a.1607.1607.3	Q9BVV2	1228.64	3	-.MSTHVAGLGLDK.M	2.4139	0.0576	423.5	17	19/44
13_1_a.1607.1607.2	CEP4_HUMAN	818.517	2	K.SKVLIMK.E	1.9593	0.0041	424.2	24	39002
13_1_a.1608.1608.3	SMO_HUMAN	1199.58	3	R.GAASSGNATGPGPR.S	1.9493	0.0524	672.1	2	25/52
13_1_a.1608.1608.2	Q4U1Z6	800.499	2	K.EGKVLVR.E	1.63	0.018	499.5	7	39033	1
13_1_a.1610.1610.3	NUDT4_HUMAN	2498.21	3	K.RAACLCFRSEQEDEVLLVSSSR.Y	1.5867	0.0413	207.8	27	24/84
13_1_a.1610.1610.2	FUT8_HUMAN	1665.88	2	R.PPYLPLAVPEDLADR.L	1.5495	0.1008	88.3	188	38988
13_1_a.1611.1611.3	FLNC_HUMAN	1664.91	3	K.VSARGPGLEPVGNVANK.P	2.2394	0.2053	1263.2	1	28/64
13_1_a.1611.1611.2	TENX_HUMAN	1110.55	2	R.ANQTYTSVAR.H	1.6031	0.1658	407.9	26	39039
13_1_a.1612.1612.2	TESK2_HUMAN	748.366	2	R.QDLMGGK.I	1.7959	0.0138	305.8	18	39002
13_1_a.1612.1612.3	ZDH11_HUMAN	1123.55	3	R.KDPYVQMDK.G	1.9435	0.1015	209.2	95	14/32
13_1_a.1613.1613.1	Q13876	687.404	1	K.EGAVLAK.K	1.1167	0.0265	94.1	1	38972	2
13_1_a.1614.1614.3	ZN517_HUMAN	1845.97	3	R.MEAGIMESPLQRKLSR.Q	1.7366	0.1084	152.2	744	17/60
13_1_a.1614.1614.2	Q6LCG8	1230.71	2	R.SPMLVSIVSLGK.T	1.7775	0.0237	281.6	54	39073
13_1_a.1615.1615.3	CU085_HUMAN	1178.64	3	K.EILSGTGINFK.K	1.5464	0.0629	307.8	2	18/40
13_1_a.1615.1615.2	TTC3_HUMAN	786.52	2	K.KLGLISR.D	1.3887	0.0463	184.9	121	38941
13_1_a.1616.1616.3	PKHG1_HUMAN	1371.75	3	R.KGISAKSQPYHR.S	1.6136	0.0607	182.9	447	17/44
13_1_a.1616.1616.2	GBB1_HUMAN	916.496	2	R.EGNVRVSR.E	1.5131	0.0026	147.6	513	38974	4
13_1_a.1618.1618.2	GOGA3_HUMAN	1371.72	2	K.QIEELQQEARK.A	1.8601	0.0484	139.8	110	13/20
13_1_a.1618.1618.3	GOGA1_HUMAN	2057.12	3	R.EIVSVAMAQALEEVRKQR.E	1.6513	0.1302	198.3	50	24/68
13_1_a.1619.1619.2	AURKC_HUMAN	1088.59	2	R.FPLSMPLGAR.D	1.8084	0.0173	307.9	20	13/18	1
13_1_a.1619.1619.3	Q8WXX0	1633.89	3	K.EKIEQYQEGLKLR.C	2.2683	0.0178	507.6	2	22/48
13_1_a.1620.1620.3	CDC5L_HUMAN	1897.02	3	K.MKILLGGYQSRAMGLMK.Q	2.0684	0.0242	379.8	12	23/64
13_1_a.1620.1620.2	Q96FF7	1264.61	2	R.RSCEREESLR.R	1.888	0.093	187.7	110	39008
13_1_a.1621.1621.3	SPG3A_HUMAN	1196.58	3	K.KMGGEEFSRR.Y	1.6228	0.0057	407.1	23	16/36	1
13_1_a.1621.1621.2	CR014_HUMAN	797.452	2	K.QSLPPQK.E	1.1703	0.0606	158	211	38910
13_1_a.1623.1623.3	COR1A_HUMAN	1272.66	3	R.RCEPIAMTVPR.K	1.6912	0.0451	223.3	749	15/40
13_1_a.1623.1623.2	Q8NB00	849.443	2	R.RCALCGVK.L	1.5556	0.0588	386	20	39035	2
13_1_a.1624.1624.2	SCRT1_HUMAN	732.364	2	R.AGAGTEAR.A	1.5738	0.0026	212.5	72	38974
13_1_a.1624.1624.3	Q15751	1099.6	3	R.QWAAQQLVR.T	1.6964	0.132	552.3	1	18/32
13_1_a.1626.1626.3	Q8N8U7	1066.65	3	R.KRLLAFYR.E	1.6623	0.2156	209.5	83	39079	1
13_1_a.1626.1626.2	GDE_HUMAN	711.415	2	R.GIPATPR.D	1.3338	0.1839	372.6	10	38941	1
13_1_a.1628.1628.3	MGAT3_HUMAN	1064.56	3	K.AGGVCFKPGTK.M	1.5497	0.1552	189.1	239	13/40
13_1_a.1628.1628.2	Q569L2	708.415	2	R.RITYR.D	1.4803	0.0001	291.7	6	38906
13_1_a.1629.1629.3	Q8IVN7	1630.89	3	K.TTVPTRSVSQSAVAAR.P	1.9217	0.1678	284.5	65	18/60
13_1_a.1629.1629.2	RAIN_HUMAN	1088.59	2	K.AAGGASGSRAKR.I	1.4852	0.0837	250.9	46	39073
13_1_a.1630.1630.2	Q8NEH7	817.496	2	K.KNALIMK.T	1.4741	0.022	553.9	4	39033
13_1_a.1630.1630.3	LBXCO_HUMAN	1225.64	3	K.KDDPVLGAGEPK.G	2.0399	0.1394	196	299	15/44
13_1_a.1631.1631.3	Q5T7Q4	1680.7	3	R.THTGEIPYECNECGK.A	1.6073	0.0286	163.7	704	17/56
13_1_a.1631.1631.2	TSC1_HUMAN	1121.54	2	R.KEERMDSAR.P	1.4403	0.0684	248.1	40	39037
13_1_a.1632.1632.1	BPA1_HUMAN	718.373	1	R.KDQAEK.G	1.7535	0.0455	231.6	10	38939
13_1_a.1634.1634.2	1433G_HUMAN	775.449	2	K.KIEMVR.A	1.908	0.0164	351.6	35	38970
13_1_a.1634.1634.3	UBR1_HUMAN	1165.48	3	-.MADEEAGGTER.M	2.2883	0.0971	466.1	9	21/40
13_1_a.1635.1635.3	KPCT_HUMAN	1345.67	3	R.EINWEELERK.E	1.5651	0.0083	115.6	424	13485	2
13_1_a.1635.1635.2	Q96FK6	897.49	2	K.IASSVHQR.V	1.8603	0.0199	351.5	3	39065
13_1_a.1636.1636.3	PM14_HUMAN	1270.69	3	R.QIRVGNTPETR.G	1.8422	0.0822	320	190	17/40
13_1_a.1636.1636.2	Q8N768	846.457	2	K.EIAKEEK.K	1.9182	0.1054	497	27	39033	2
13_1_a.1637.1637.3	LRIG1_HUMAN	1538.95	3	R.ITQLPVRAFKLPR.L	1.5779	0.0618	161.5	294	18/48
13_1_a.1637.1637.2	COIA1_HUMAN	1025.55	2	K.GSKGAPGPAGAR.G	1.7423	0.0053	348.7	3	15/22	1
13_1_a.1638.1638.2	VSIG4_HUMAN	1551.84	2	R.PILEVPESVTGPWK.G	1.1297	0.1367	42.7	783	38955
13_1_a.1638.1638.3	Q5SY80	2327.32	3	R.GFIRLGGIVNLPDGGITGISSRK.W	1.0597	0.023	155.8	177	23/88	2
13_1_a.1639.1639.2	Q3KN84	1202.53	2	K.SVGEAEDGPEGR.G	1.9066	0.007	408.2	4	16/22
13_1_a.1639.1639.3	Q5TH93	1803.87	3	K.GKKAANGLEADNSCPNSK.A	1.9252	0.0292	326.7	42	23/68
13_1_a.1640.1640.1	AP4S1_HUMAN	589.305	1	K.QGQTR.L	1.5918	0	212.8	31	38906	3
13_1_a.1642.1642.2	Q8IV32	1161.59	2	R.DDGFQPTILR.S	1.1832	0.0147	266.3	4	39069
13_1_a.1642.1642.3	CO6A3_HUMAN	1743.03	3	R.LQPVLQPLPSPGVGGKR.D	1.605	0.0669	210.3	196	22/64
13_1_a.1643.1643.2	DUET_HUMAN	1209.53	2	K.RCNDMMNLGR.L	2.2682	0.1135	518.8	1	15/18
13_1_a.1643.1643.3	PCD15_HUMAN	1815.91	3	K.SVANMYSQIEKNYLR.T	1.737	0.046	129.3	389	17/56	2
13_1_a.1644.1644.3	INCE_HUMAN	1571.79	3	R.REQERQLAEQER.R	1.5642	0.0498	228.4	179	16/44
13_1_a.1644.1644.2	I22RA_HUMAN	1047.53	2	R.RSQRSEER.C	1.8229	0.0568	289.7	79	39035
13_1_a.1645.1645.2	Q7Z3B3	1215.66	2	K.WAADRAAIVSR.W	2.0543	0.2076	232.4	14	39071
13_1_a.1645.1645.3	VGF_HUMAN	1824.92	3	R.HYHHALPPSRHYPGR.E	1.4163	0.0748	141.9	441	15/56	1
13_1_a.1646.1646.1	BRE1A_HUMAN	655.341	1	R.EHIEK.L	1.4086	0	134.1	5	38876
13_1_a.1647.1647.3	Q702P2	1361.69	3	K.ENALSELDVPFK.V	1.8862	0.159	286.1	49	20/44	3
13_1_a.1647.1647.2	Q8N6W7	907.463	2	K.RDSSAFPK.K	1.5554	0.0464	489.9	1	39065	1
13_1_a.1648.1648.1	CF146_HUMAN	575.278	1	R.DGAAGGK.I	1.3761	0.0297	217	16	38941
13_1_a.1650.1650.3	Q6ZSP5	1331.75	3	R.GASLPCVIVLGFR.R	1.8957	0.0589	208.9	257	16/48
13_1_a.1650.1650.2	Q86V43	887.495	2	R.QAALQQTK.E	1.7458	0.0527	146.4	550	38974
13_1_a.1651.1651.2	Q8NCU4	1029.58	2	K.EAQLERKR.E	1.8103	0.0077	688.9	2	13/14
13_1_a.1651.1651.3	Q3MJE6	1544.77	3	R.AAVSQQGEQLQTER.E	2.0066	0.0071	455.5	29	20/52
13_1_a.1652.1652.2	Q8N279	951.548	2	K.RLPSHVSR.Q	1.6033	0.0017	120.9	585	38912
13_1_a.1652.1652.3	Q96MG2	1423.69	3	R.EGGHRPWARDSR.D	1.914	0.1277	247.1	81	17/44
13_1_a.1653.1653.3	Q9ULD5	1536.76	3	K.SFSEKSKLTNHCR.V	1.5123	0.0181	83.7	824	17868	1
13_1_a.1653.1653.2	CTL3_HUMAN	1025.51	2	K.EQQHGALSR.Y	1.5144	0.1041	124.5	262	38945	1
13_1_a.1654.1654.2	LCB1_HUMAN	1018.47	2	K.EQEIEDQK.N	1.6168	0.0259	522.1	9	39035	1
13_1_a.1654.1654.3	MAST1_HUMAN	1528.71	3	K.EKESPGGAEACTPPR.A	1.813	0.0065	510	3	23/56
13_1_a.1655.1655.2	EPIPL_HUMAN	1259.62	2	R.ELSEQLGQAER.A	1.6653	0.0148	419.2	10	14/20
13_1_a.1655.1655.3	HS70L_HUMAN	1888.95	3	K.CNELLSWLEVNQLAEK.D	1.6766	0.0371	217.9	362	17/60	1
13_1_a.1656.1656.3	FATE1_HUMAN	1141.65	3	K.KMGSQLPKPR.M	1.9939	0.1045	420.5	1	19/36
13_1_a.1656.1656.2	Q6XYD6	761.368	2	K.EAGLDEK.G	2.1832	0.0529	280.1	10	38972
13_1_a.1658.1658.2	Q5MJ67	1130.54	2	K.QEEIQGGDVR.T	1.6022	0.0116	702.3	1	14/18
13_1_a.1658.1658.3	MGR7_HUMAN	1697.86	3	R.PNENRTGCQDIPIIK.L	1.5943	0.0299	450.3	3	22/56
13_1_a.1659.1659.2	AT2B1_HUMAN	798.52	2	K.KANLPKK.E	1.1286	0.0096	136.3	165	38910
13_1_a.1659.1659.3	Q6P6B1	1195.72	3	R.ESRPPLQKLK.V	1.6093	0.0216	445.2	38	16/36
13_1_a.1660.1660.2	RS11_HUMAN	903.562	2	K.VTKAAGTKK.Q	1.8502	0.0312	424.5	111	39006
13_1_a.1660.1660.3	NPTX2_HUMAN	1356.8	3	R.EAIRELTGKLAR.C	1.3403	0.0041	234.1	160	14/44
13_1_a.1661.1661.1	EMIL1_HUMAN	927.464	1	R.QQPADAAAR.P	1.0861	0.0293	278.4	2	39006
13_1_a.1664.1664.1	SDS3_HUMAN	773.488	1	K.EKKAAVK.E	1.2854	0.1141	207.1	13	38941
13_1_a.1666.1666.2	CHM1A_HUMAN	805.441	2	K.KAEKDSK.A	1.2256	0.0019	270.8	88	38941
13_1_a.1666.1666.3	Q6SJ93	1208.71	3	K.KALQQKDIHK.K	1.5093	0.0562	339.5	20	14/36
13_1_a.1668.1668.2	CI116_HUMAN	983.454	2	R.TSNQAYGSR.A	1.546	0.023	239.5	11	39037	1
13_1_a.1668.1668.3	CATW_HUMAN	1473.77	3	K.DYPFQGKVRAHR.C	1.7927	0.0389	200.1	271	17/44
13_1_a.1670.1670.2	ZN638_HUMAN	937.5	2	R.FYPAGRAR.G	1.9204	0.1255	276.5	2	39004
13_1_a.1670.1670.3	Q9BYD0	1404.71	3	K.GKYWGKFYMPK.R	2.1007	0.1947	129.3	868	14/40
13_1_a.1671.1671.1	MYH11_HUMAN	532.295	1	R.RSGGR.R	1.1746	0.0595	98.4	96	38845	2
13_1_a.1672.1672.2	Q6ZTK3	1173.67	2	K.ELSIAMQLLR.N	1.9173	0.0185	317.4	70	39069
13_1_a.1672.1672.3	Q5JV36	1761.87	3	K.GPMGPPGPKGDQGEKGPR.G	2.2127	0.1884	334	40	21/68
13_1_a.1674.1674.3	SFR14_HUMAN	1393.73	3	R.ATTGTQTLLSSGTR.L	1.3729	0.0154	130.8	552	13/52
13_1_a.1674.1674.2	SYT2_HUMAN	929.542	2	K.LGKNEAIGK.I	1.3455	0.0063	329.7	4	39067	1
13_1_a.1675.1675.2	Q6V1P9	902.494	2	K.ESILADVR.K	1.348	0.139	192	168	38974
13_1_a.1675.1675.3	ADNP_HUMAN	1353.73	3	K.PQDKKSMGLPPR.I	1.2545	0.0725	172.1	697	14/44
13_1_a.1676.1676.2	Q8TC44	998.542	2	K.RGKFSEFK.A	1.611	0.1401	380.9	7	39004
13_1_a.1676.1676.3	KPCB_HUMAN	1497.84	3	R.RGRIYIQAHIDR.D	1.3887	0.0025	181.9	449	15/44
13_1_a.1678.1678.2	Q15751	823.431	2	R.KEYVER.A	1.1177	0.0294	147	182	38878
13_1_a.1678.1678.3	K0859_HUMAN	1236.59	3	K.QMKECNATRR.P	1.4028	0.0312	326.7	15	16/36
13_1_a.1679.1679.3	RIOK2_HUMAN	1319.72	3	K.GEANIFTKQRR.E	1.6381	0.0364	260.7	122	17/40
13_1_a.1679.1679.2	Q53P42	880.548	2	R.IGRPKGPR.D	1.3413	0.0209	443.9	3	39065	1
13_1_a.1680.1680.1	AFG32_HUMAN	659.372	1	K.KASEPK.E	1.0822	0.0456	74	234	38878
13_1_a.1683.1683.3	NFAC4_HUMAN	1439.75	3	R.SVRLGGPGGGAGGAGGGR.V	1.1044	0.0519	202	106	21/68	1
13_1_a.1683.1683.2	Q8NFY8	958.52	2	K.EGLGNEVLK.M	1.5366	0.071	221.4	64	39067
13_1_a.1684.1684.3	Q6ZRV2	1289.69	3	R.GSLTLTISGESPK.A	2.1036	0.0045	809.8	2	25/48
13_1_a.1684.1684.2	Q86WW8	859.474	2	K.RSVLDNR.A	1.8379	0.0206	343.5	198	39002
13_1_a.1685.1685.3	UBXD3_HUMAN	1934	3	R.IPHKSVLGISLEDGEGWP.-	1.7969	0.0235	415.1	14	21/68
13_1_a.1685.1685.2	Q5T511	1289.66	2	R.TGGGGSSRPEKTR.R	1.5023	0.0288	331.7	31	14/24
13_1_a.1686.1686.3	AGTR1_HUMAN	1711.84	3	K.SHSNLSTKMSTLSYR.P	2.3794	0.24	526.8	18	23/56
13_1_a.1686.1686.2	PEX13_HUMAN	1142.69	2	R.RLQRMLGLR.R	1.7482	0.1196	409.9	18	39037
13_1_a.1687.1687.2	Q9H607	1185.65	2	K.EAQVAARVWR.E	1.453	0.0078	197.1	339	38978
13_1_a.1687.1687.3	ANDR_HUMAN	1777.86	3	R.MLYFAPDLVFNEYR.M	1.6332	0.1128	657.5	1	23/52	1
13_1_a.1688.1688.3	Q5VT05	1061.49	3	R.QESPSVPSCK.E	1.5946	0.0205	289.3	87	14/36	1
13_1_a.1688.1688.2	RFC1_HUMAN	707.357	2	K.ESESKK.S	1.5958	0	392.8	31	38939
13_1_a.1690.1690.3	Q8TBH0	1562.8	3	R.ARGRAHVHWTESR.S	1.7577	0.0372	104.9	552	14/48
13_1_a.1690.1690.2	Q495T6	1041.58	2	K.DRPAVEKAR.T	1.9101	0.1136	134.7	117	38976
13_1_a.1691.1691.2	COR2B_HUMAN	913.521	2	R.VIEPRSGR.V	1.1507	0.0294	205.6	174	38974
13_1_a.1691.1691.3	PDE5A_HUMAN	1369.62	3	K.SGNGGTFTEKDEK.D	1.4324	0.0438	164.8	935	15/48
13_1_a.1692.1692.2	Q7Z4U1	812.488	2	K.ENPLLVK.I	1.5985	0.0013	323	5	39033
13_1_a.1692.1692.3	Q5T925	1217.58	3	K.AGMQFTMLYR.D	2.0073	0.1599	288.6	5	18/36
13_1_a.1693.1693.1	HMG1X_HUMAN	641.325	1	K.DPNAPK.R	1.0113	0.1036	157.9	5	38908	13
13_1_a.1695.1695.3	TAGL_HUMAN	1221.63	3	K.QMEQVAQFLK.A	1.7283	0.0897	339.3	2	17/36	1
13_1_a.1695.1695.2	Q5TEA6	815.499	2	K.KANILEK.E	1.8732	0.0795	249.6	7	38972
13_1_a.1696.1696.2	DGKI_HUMAN	1237.61	2	R.CKPTFREGGSR.S	1.8429	0.0584	196	127	39071
13_1_a.1696.1696.3	HS70L_HUMAN	1856.84	3	K.LYQGGCTGPACGTGYVPGR.P	2.0611	0.1759	514.8	1	28/72	1
13_1_a.1698.1698.2	COPA_HUMAN	1302.73	2	K.RSSGLTAVWVAR.N	1.6733	0.149	243.6	54	13/22	1
13_1_a.1698.1698.3	Q5SXQ0	1955.91	3	R.EAADPWWQRQQAQEGR.M	1.498	0.003	268.9	36	17/60
13_1_a.1699.1699.3	DMD_HUMAN	2303.23	3	R.IFLTEQPLEGLEKLYQEPR.E	1.3068	0.0105	222.2	108	22/72	2
13_1_a.1700.1700.2	Q9NY47	867.48	2	R.RPTSGPPR.P	1.6099	0.0997	390.4	3	39035	1
13_1_a.1700.1700.3	P78365	1301.71	3	K.RVGLFHSDRSK.L	1.6873	0.0067	197.4	443	15/40	4
13_1_a.1701.1701.3	ABCBA_HUMAN	1759.88	3	K.VTQDSLAQATQLAEER.I	2.3202	0.0955	413.7	26	21/60
13_1_a.1701.1701.2	CO1A1_HUMAN	1172.53	2	K.NGDDGEAGKPGR.P	2.4136	0.032	439.3	13	15/22
13_1_a.1702.1702.3	Q9H3U5	1933.98	3	R.AQGGNLNYSARQREEIK.F	1.76	0.0419	220.2	42	20/64
13_1_a.1702.1702.2	LIFR_HUMAN	1288.72	2	K.NITDISQKTLR.I	1.4807	0.0379	130.2	226	38980
13_1_a.1703.1703.3	GBRR2_HUMAN	1651.77	3	R.SFTHDTTTDNIMLR.V	1.7109	0.1609	242.4	100	17/52
13_1_a.1703.1703.2	Q7L9B9	1102.56	2	K.DWSKKDAPR.N	1.3713	0.0812	153.7	247	39006
13_1_a.1704.1704.2	Q86WN1	1286.73	2	K.EVQRLTSRAAR.D	1.7126	0.0232	151.5	241	38980
13_1_a.1704.1704.3	CT151_HUMAN	1930.13	3	R.LEGALHLLLAQQQLRAR.A	2.2693	0.1643	301.6	18	23/64	1
13_1_a.1707.1707.3	PRG4_HUMAN	1567.83	3	K.ALENSPKEPGVPTTK.T	2.0945	0.1497	367.1	1	24/56
13_1_a.1707.1707.2	CN153_HUMAN	1045.54	2	R.RDTAPSGVSR.F	2.2768	0.1818	211.4	49	39039
13_1_a.1709.1709.3	CUTL2_HUMAN	2360.22	3	K.LASSTCSLPQGMAKPEDSLLIAK.E	1.3008	0.2145	132.9	319	19/88
13_1_a.1709.1709.2	Q5VXQ5	1573.84	2	R.RAAALQPDFDVSKR.L	1.0442	0.0023	56.1	542	38986	1
13_1_a.1710.1710.1	ACK1_HUMAN	675.367	1	R.LSSSPGK.T	1.1273	0.0016	141.5	1	38972	1
13_1_a.1711.1711.2	Q4U1Z6	1272.77	2	K.KTVTIRAGASLR.L	1.4823	0.0316	96.1	711	38982	2
13_1_a.1711.1711.3	GOGA3_HUMAN	1910.02	3	R.LEESNKKLALELEHEK.G	1.6556	0.089	315.5	33	24/60
13_1_a.1712.1712.2	CLUS_HUMAN	1075.54	2	K.KEDALNETR.E	1.9615	0.0031	336	5	39067	1
13_1_a.1712.1712.3	VPS16_HUMAN	1612.79	3	K.NELNRGDFFMTLR.N	2.1003	0.0534	134.8	615	15/48	1
13_1_a.1714.1714.3	Q6ZQS7	1844.94	3	R.QLTPPPPSAPPSADDNIK.T	1.3246	0.0886	341	64	21/68
13_1_a.1714.1714.2	PAIRB_HUMAN	1229.59	2	R.KPNEGADGQWK.K	1.8569	0.0655	556.4	2	13/20
13_1_a.1715.1715.3	STAT1_HUMAN	1518.85	3	K.GFRKFNILGTHTK.V	1.7568	0.009	387.4	12	18/48
13_1_a.1715.1715.2	ATP4B_HUMAN	1011.58	2	R.ELGQPLQVK.Y	1.9369	0.0649	232.2	113	38976
13_1_a.1716.1716.3	Q68CJ6	1493.88	3	R.EELKNLTKLLHR.T	1.8317	0.1176	283	24	19/44
13_1_a.1716.1716.2	DOT1L_HUMAN	996.656	2	R.LSPAKIVLR.R	1.3515	0.0124	88.8	792	38945
13_1_a.1717.1717.3	PEDF_HUMAN	1250.66	3	R.DTDTGALLFIGK.I	1.761	0.1737	492.9	98	18/44
13_1_a.1717.1717.2	HMGIC_HUMAN	833.436	2	K.KAEATGEK.R	1.2926	0.008	271.3	415	38974
13_1_a.1718.1718.3	LHX3_HUMAN	1904.02	3	K.QLETLKSAYNTSPKPAR.H	1.2766	0.0266	121.2	274	19/64	1
13_1_a.1718.1718.2	RFC4_HUMAN	1270.77	2	R.LLDIAKKENVK.I	1.5343	0.1961	211.9	4	39071
13_1_a.1719.1719.2	EXOSX_HUMAN	766.409	2	R.KAAEYGK.K	1.6318	0.0563	192.2	28	38972
13_1_a.1719.1719.3	Q5SWX9	1150.56	3	-.MPSSGSVSRSR.Q	1.5811	0.0026	110.9	274	14946
13_1_a.1720.1720.3	RP29_HUMAN	1097.67	3	K.EDRLKVIPK.L	2.1298	0.0397	241.8	13	13/32
13_1_a.1720.1720.2	Q6P987	731.38	2	R.ESSRPR.G	1.7568	0.0266	204.8	146	38939	1
13_1_a.1722.1722.3	Q96A05	1586.87	3	R.NDLISDLLSEAKLR.L	2.0002	0.04	386.5	156	17/52
13_1_a.1722.1722.2	RABE1_HUMAN	1059.54	2	K.AQEDAEKLR.S	1.893	0.0219	348.4	182	38976
13_1_a.1723.1723.2	Q5SZ07	1033.63	2	R.FLLSKGGRR.A	1.8674	0.0143	329.1	58	39037
13_1_a.1723.1723.3	BSN_HUMAN	1549.88	3	K.HPSKSLAPAAISSKR.S	1.9296	0.0068	338.7	63	18/56
13_1_a.1724.1724.2	O95367	963.464	2	R.EHPGGTHTK.V	1.492	0.014	123.6	915	38945	1
13_1_a.1724.1724.3	NRIP3_HUMAN	1444.73	3	K.EHVKSHKHEGEK.L	1.5672	0.033	200.7	433	14/44
13_1_a.1725.1725.3	CT032_HUMAN	1584.8	3	R.EDEHSSELLKKNR.A	1.8255	0.1775	529.9	11	19/48
13_1_a.1725.1725.2	Q9Y6L7	1058.56	2	R.LSQGDIAQAR.K	1.3866	0	406.1	65	39069
13_1_a.1726.1726.3	Q8NE65	1452.75	3	R.HSMVATPPESGVLK.F	1.7173	0.123	390.5	16	21/52
13_1_a.1726.1726.2	Q9UHN6	967.427	2	R.FDTHEYR.N	1.4388	0.0519	158.4	272	38910
13_1_a.1727.1727.3	NK2R_HUMAN	1247.57	3	K.CVVAWPEDSGGK.T	2.1264	0.0894	239.8	496	16/44	1
13_1_a.1727.1727.2	PDZK3_HUMAN	831.414	2	K.KGMDQPR.P	1.9261	0.0088	556.3	3	39033
13_1_a.1728.1728.3	DMN_HUMAN	1678.8	3	K.DEASEMEKAVESVVR.E	1.9195	0.0697	131.9	835	16/56
13_1_a.1728.1728.2	Q8N228	1118.56	2	K.QANAGPYLER.K	2.0138	0.0148	291.4	41	39069	3
13_1_a.1730.1730.2	SNW1_HUMAN	756.452	2	R.KGWIPR.L	1.3627	0.0016	75.5	585	38878
13_1_a.1730.1730.3	HILS1_HUMAN	1135.48	3	K.QWGHCDPHR.I	1.5146	0.127	195.1	201	14/32
13_1_a.1731.1731.3	Q7Z6J0	1255.65	3	R.KGEMFLVFER.C	1.8748	0.1253	114.3	212	13485	1
13_1_a.1731.1731.2	H2A2_HUMAN	837.421	2	R.KGNYAER.V	2.5178	0.3669	337.2	1	39033	9
13_1_a.1732.1732.3	Q6ZSV4	1765.93	3	R.TLLIFGACCAANTRRR.R	2.289	0.0116	236	146	21/60
13_1_a.1732.1732.2	S6A10_HUMAN	1177.61	2	R.EISVALCCALR.F	2.5117	0.0814	301.5	40	14/20
13_1_a.1733.1733.3	PTN21_HUMAN	1469.79	3	R.RYTVSSKSCLVAR.I	1.7208	0.0429	524.8	4	22/48
13_1_a.1733.1733.2	Q8TDJ6	980.505	2	K.TEKNFVDK.I	1.597	0.0459	289	20	39004
13_1_a.1734.1734.3	LIPA3_HUMAN	1558.79	3	R.GEGPAIPGDTPPPTPR.S	1.7633	0.0542	195.4	386	22/60
13_1_a.1734.1734.2	CCNE1_HUMAN	1038.45	2	K.EDGGAEFSAR.S	1.3144	0.0004	178.5	179	39039
13_1_a.1735.1735.2	COR2A_HUMAN	1192.66	2	R.SSKFRHVFGK.P	1.6119	0.0379	110.8	396	38947	1
13_1_a.1735.1735.3	PHS2_HUMAN	1790.81	3	K.LDQRGYNAQEYYDR.I	1.6902	0.0034	187.7	213	17/52
13_1_a.1736.1736.3	FA8_HUMAN	1647.79	3	R.LWDYGMSSSPHVLR.N	1.777	0.0042	365.5	182	18/52	1
13_1_a.1736.1736.2	RASL2_HUMAN	1098.7	2	K.SALIKLANIR.A	1.9944	0.0733	545.8	3	13/18
13_1_a.1738.1738.2	RIMS1_HUMAN	791.412	2	K.QASSRSR.S	1.7833	0.05	239.7	4	39002
13_1_a.1738.1738.3	Q5T9S5	1187.65	3	K.KEIERTQQR.M	1.963	0.0307	231.3	33	16/32	2
13_1_a.1739.1739.2	O60735	1643.88	2	K.DPNAFLFDHLLTLK.P	1.3196	0.0397	72.7	399	38955	1
13_1_a.1739.1739.3	MMRN1_HUMAN	2466.39	3	R.LQDIESKVTQTLIPYYISVKK.G	1.3958	0.1798	171.7	187	19/80	1
13_1_a.1740.1740.3	NPHN_HUMAN	1243.65	3	R.AGQSLELPCVAR.G	1.9683	0.0935	407.8	2	21/44
13_1_a.1740.1740.2	Q6ZTD5	829.428	2	R.GAGGVGAGQR.H	1.8421	0.0256	195.8	90	39039
13_1_a.1741.1741.2	Q5W0M5	1052.51	2	R.HAGTEDGPIR.R	1.3227	0.0516	214.9	10	13/18
13_1_a.1741.1741.3	TES_HUMAN	1580.73	3	K.EKCEGFELHFWR.K	1.5172	0.0726	189.5	159	17/44
13_1_a.1742.1742.1	Q8N1G1	737.394	1	K.GAALYSR.L	1.0341	0.0678	117.8	259	38880
13_1_a.1743.1743.3	EXTL3_HUMAN	1798.82	3	K.ATRGCRLHNCFDYSR.C	1.7231	0.0646	132.1	304	19/56
13_1_a.1743.1743.2	Q96S34	1199.65	2	R.QEVVSTAGPRR.G	1.8006	0.123	185.7	76	39071
13_1_a.1744.1744.2	O43154	877.514	2	K.EFLVTLR.L	1.5858	0.0839	105.6	289	38941
13_1_a.1744.1744.3	MARH4_HUMAN	1317.68	3	K.TKDLEDQKAGGR.T	2.1135	0.0304	255.3	30	18/44
13_1_a.1746.1746.2	Q9NY47	783.337	2	R.ESSCVMK.Q	1.5589	0.0119	168	191	38910	1
13_1_a.1746.1746.3	ZN527_HUMAN	1175.6	3	R.QSAHLAQHQR.I	1.7959	0.036	294.1	174	14/36	1
13_1_a.1747.1747.3	MCF2L_HUMAN	1701.86	3	R.HLCDQFSAEIARRR.G	1.6105	0.0592	335.8	52	18/52	4
13_1_a.1747.1747.2	Q9H5K2	1133.62	2	K.LMSIMGNVLR.F	1.8815	0.1007	666.5	3	13/18	1
13_1_a.1748.1748.2	K0310_HUMAN	1022.59	2	R.RHLLQEAR.S	1.8685	0.0541	321.4	2	39004	2
13_1_a.1748.1748.3	NEDD1_HUMAN	1534.7	3	K.EENENRDLTAESK.K	1.8204	0.0278	198.6	172	14/48
13_1_a.1749.1749.3	DYI3_HUMAN	1668.85	3	K.ERKLTNQFNFSER.A	1.6116	0.0848	227	432	18/48	1
13_1_a.1749.1749.2	IMP4_HUMAN	1113.59	2	R.NVELTEVGPR.F	1.4596	0.0178	326.5	33	39069
13_1_a.1750.1750.3	Q6ZNN8	1326.8	3	R.RTPRSTGIVLAR.V	1.4833	0.0049	265.7	174	16/44
13_1_a.1750.1750.2	TMC2_HUMAN	884.604	2	R.KKIQVLR.E	1.4688	0.0132	353.6	10	39002
13_1_a.1751.1751.1	Q9HBS0	693.316	1	R.EASSGSR.T	1.3255	0.0145	46.3	145	38880
13_1_a.1754.1754.3	Q96II8	1339.64	3	R.EFQKTEDMRR.Y	1.5691	0.1068	233.2	82	16/36
13_1_a.1754.1754.2	P2RX1_HUMAN	893.367	2	K.EDSGCTPGK.A	1.3133	0.0083	150.7	130	39006
13_1_a.1755.1755.1	Q9H3J6	674.42	1	R.EAAKKK.Q	1.1467	0	59.7	75	38878
13_1_a.1756.1757.3	Q8N7H4	1625.85	3	K.PTSTSELQVPINSPR.R	1.8111	0.0397	195.8	184	18/56	1
13_1_a.1756.1757.2	DDX17_HUMAN	1083.59	2	K.GPQIRDLER.G	1.5492	0.0207	145.6	321	38945	1
13_1_a.1758.1758.3	SYNJ2_HUMAN	1502.86	3	K.KLLEFDQLQLQK.S	1.7644	0.0263	899.6	1	22/44
13_1_a.1758.1758.2	Q8N715	1001.57	2	R.QEKLEKAR.A	2.3071	0.0218	363.6	156	39004
13_1_a.1759.1759.2	Q68DL8	1116.53	2	R.GAEGAAEAEGVR.R	1.8527	0.1244	222.1	89	14/22	1
13_1_a.1759.1759.3	RA54B_HUMAN	1676.95	3	R.RAAELTCLTGLFILR.R	2.0052	0.0901	446	1	23/56
13_1_a.1760.1760.3	CA036_HUMAN	1233.71	3	R.PRGSLATFKTR.A	2.0722	0.1368	182.2	80	16/40
13_1_a.1760.1760.2	BAZ1B_HUMAN	822.472	2	K.KYSLPSK.F	1.4556	0.0045	118.7	255	38972
13_1_a.1762.1762.3	Q8N9Z2	1389.77	3	R.AATPTLTTFPTIR.V	1.4031	0.0334	300.6	56	17/48
13_1_a.1762.1762.2	HNRPG_HUMAN	926.517	2	K.RSAPSGPVR.S	1.3129	0.0088	198	263	39006
13_1_a.1763.1763.3	Q92589	1306.65	3	R.PGDFPMPFISAK.S	1.5714	0.0567	320.8	76	18/44
13_1_a.1763.1763.2	O95568	870.516	2	K.QPSLRAAK.E	1.3664	0.081	204.4	83	38974	1
13_1_a.1764.1764.3	DPH5_HUMAN	1073.58	3	K.EQSLENLIK.G	1.9677	0.0796	317.5	47	14/32
13_1_a.1764.1764.2	Q9BVF7	715.453	2	R.KVLMPK.L	1.8061	0.0694	502.2	7	38970	1
13_1_a.1765.1765.3	Q5FWY2	1400.82	3	R.VRPPAPAAAAARPR.P	1.2334	0.0545	280.9	77	17/52
13_1_a.1766.1766.3	CRYAB_HUMAN	1268.72	3	R.EEKPAVTAAPKK.-	2.2415	0.1672	734.1	2	23/44
13_1_a.1766.1766.2	Q4L180	846.493	2	K.EDLTKLK.T	1.8958	0.0653	599.6	22	39033	1
13_1_a.1767.1767.3	Q96K15	1459.69	3	R.GDSGEQVGQVAWAR.V	2.2679	0.02	334.1	55	20/52
13_1_a.1767.1767.2	GATA2_HUMAN	973.517	2	K.EGIQTRNR.K	1.767	0.1138	161.7	481	38974	2
13_1_a.1768.1768.2	JAM1_HUMAN	1148.64	2	K.KVIYSQPSAR.S	1.8752	0.0641	265.8	83	39008	1
13_1_a.1768.1768.3	SPTA2_HUMAN	1720.92	3	R.QGKLFGAAEVQRFNR.D	2.2249	0.0377	468.3	6	22/56
13_1_a.1770.1770.2	BRCA2_HUMAN	747.327	2	K.ENNENK.S	2.3456	0.0939	463.9	9	38970
13_1_a.1770.1770.3	Q5JSN8	1122.59	3	R.GQAFITFPNK.E	1.9123	0.0266	432.5	17	16/36	1
13_1_a.1771.1771.3	ARI4A_HUMAN	1213.7	3	K.RRLNDELLGK.V	1.8079	0.1264	410.9	1	19/36
13_1_a.1771.1771.2	GBB5_HUMAN	809.44	2	R.EVAIYSK.E	1.5573	0.0393	132.8	134	38910	1
13_1_a.1772.1772.1	Q8IWG2	749.368	1	R.EDASTVK.S	1.2687	0.0656	75.8	17	38910
13_1_a.1773.1773.3	TLR6_HUMAN	1735.94	3	K.SFHFVCLMIIIVGTR.I	1.6155	0.0429	210.1	47	19/56
13_1_a.1773.1773.2	COR1B_HUMAN	1158.66	2	R.RGTLVAEREK.A	1.4919	0.0516	131.7	157	38978	1
13_1_a.1775.1775.2	HAX1_HUMAN	976.604	2	K.SISVTKITK.P	1.3786	0.0435	195.3	359	39006	2
13_1_a.1775.1775.3	RS4Y1_HUMAN	1465.74	3	K.TGEHFRLVYDTK.G	1.4997	0.001	212	966	16/44	1
13_1_a.1776.1776.2	Q86XP1	765.356	2	K.QKCDSGK.P	1.5462	0.0275	182	55	38941	1
13_1_a.1776.1776.3	SKIV2_HUMAN	1146.63	3	R.RIMESVNGLK.S	1.6377	0.038	510.4	1	20/36	4
13_1_a.1778.1778.3	Q8TBW5	1115.61	3	R.DSGPAIGKDKK.T	1.3081	0.0728	144.8	151	15/40
13_1_a.1778.1778.2	CO1A1_HUMAN	744.364	2	R.GETGPAGR.P	1.3585	0.184	141.5	80	39004
13_1_a.1779.1779.3	SYR_HUMAN	1521.85	3	K.VEIAGPGFINVHLR.K	1.9023	0.095	205	172	18/52
13_1_a.1779.1779.2	Q6ZQX7	1014.51	2	R.EGGAAGPRGSR.L	2.2236	0.1928	243.1	71	13/20
13_1_a.1781.1781.2	Q5T9S5	919.484	2	R.ESSAEKLR.K	1.2415	0.0006	256.4	30	39065	3
13_1_a.1781.1781.3	DGKB_HUMAN	1380.78	3	K.TGLFCSLVKRTR.N	1.8097	0.0352	313.6	58	20/44
13_1_a.1782.1782.2	RAB21_HUMAN	1071.53	2	-.AAAGGGGGGAAAAGR.A	1.7186	0.0351	367.1	4	18/28
13_1_a.1782.1782.3	SIAT9_HUMAN	1604.9	3	R.YSVDLLPFVQKAPK.D	1.7542	0.0088	208.6	57	20/52
13_1_a.1783.1783.3	GON2_HUMAN	1777.93	3	R.ALSSAQDPQNALRPPGR.A	1.8043	0.0912	270.9	40	21/64
13_1_a.1783.1783.2	UBP49_HUMAN	1184.65	2	R.GQKQDTPVRR.G	1.5516	0.0296	164	231	39008	1
13_1_a.1784.1784.1	IF2P_HUMAN	631.352	1	K.NQKNK.P	1.1409	0	72.4	35	38845
13_1_a.1786.1786.2	Q6ZW76	1207.69	2	R.KKGVSIHEGPR.A	1.6341	0.0679	142.7	486	38980	2
13_1_a.1786.1786.3	ROA0_HUMAN	1811.84	3	K.EDIYSGGGGGGSRSSRGGR.G	1.5225	0.0366	297.8	132	22/72
13_1_a.1787.1787.3	Q96MM2	1457.85	3	R.PGSFTGLALVVVAAR.H	1.6287	0.0274	306.8	34	21/56
13_1_a.1787.1787.2	Q15015	971.6	2	K.LNKLEKAR.L	2.0842	0.0238	415.6	9	39035	1
13_1_a.1788.1788.2	Q5T0F2	803.412	2	K.EAGAGSRR.R	1.6837	0.0039	354.6	5	39035
13_1_a.1788.1788.3	Q6ZR87	1205.66	3	K.KEEDRLFIR.Y	1.9636	0.0371	221.3	23	13/32	1
13_1_a.1790.1790.1	LEFTB_HUMAN	531.288	1	R.EVAGR.F	1.1394	0.014	79.5	76	38845	1
13_1_a.1791.1791.3	Q9P2Q1	1500.78	3	R.AQDRTGKQDGLSPK.E	2.1766	0.056	170.2	693	15/52
13_1_a.1791.1791.2	SH3L2_HUMAN	1000.59	2	K.KKQQDVVR.F	2.1967	0.0166	486.5	22	39035
13_1_a.1792.1792.3	Q6NVW5	1410.69	3	K.DNIYTSEVVSQR.G	1.6581	0.1364	508.9	18	21/44	1
13_1_a.1792.1792.2	Q6IEE7	939.512	2	R.RTLQEHR.L	1.2881	0.0099	220.5	268	38972
13_1_a.1794.1794.2	PAXI_HUMAN	843.493	2	K.AGPLTKEK.P	1.9654	0.214	171.1	99	39004	1
13_1_a.1794.1794.3	Q96A59	1265.64	3	R.AGEHGVWEKPR.Q	1.6336	0.0297	96.3	537	14946	2
13_1_a.1795.1795.2	HBXAP_HUMAN	1072.63	2	K.TNVGRTLRR.S	1.5836	0.0279	520.6	14	39067
13_1_a.1795.1795.3	FBLN1_HUMAN	1610.81	3	R.YMDGMTVGVVRQVR.P	1.3605	0.1136	366.9	12	20/52	1
13_1_a.1796.1796.2	FZR_HUMAN	1242.66	2	K.KLSMLEGHTAR.V	2.0975	0.1511	369.4	14	14/20
13_1_a.1796.1796.3	Q9H699	1866.03	3	K.AKQVLLENSLHCAPKSK.P	1.8426	0.0058	413	7	25/64
13_1_a.1797.1797.2	ZN206_HUMAN	922.544	2	R.RNAHLRR.H	1.4974	0.0611	259.2	6	38972
13_1_a.1797.1797.3	Q9ULX3	1385.84	3	R.RRLAVLPYELR.F	2.0766	0.1084	192.2	94	15/40
13_1_a.1798.1798.3	Q6ZSE6	1507.81	3	R.QKSSLSNNSLKSSK.N	2.2074	0.0511	297.3	80	19/52
13_1_a.1798.1798.2	Q8IWG1	1004.55	2	K.RSEFGAPIK.F	2.1234	0.1015	503.1	7	39067	1
13_1_a.1799.1799.1	WDR33_HUMAN	745.363	1	R.WTPEGR.R	1.3831	0.0081	129.2	5	38878	2
13_1_a.1802.1802.3	Q8N9X4	1088.6	3	R.CLVPVPPHAR.A	1.3591	0.0523	171.3	95	13/36
13_1_a.1802.1802.2	Q6R6M4	725.376	2	K.ACLPGHK.Q	1.5292	0.0006	158.8	141	38880	2
13_1_a.1803.1803.2	Q6ZVZ7	1225.63	2	R.ADAAGLAWPPTR.R	2.3483	0.154	342.9	79	39073
13_1_a.1803.1803.3	O75239	1838.89	3	-.MAPTIQTQAQREDGHR.S	2.2194	0.0195	444.7	68	22/60	2
13_1_a.1804.1804.3	K1C14_HUMAN	1646.81	3	K.DYSPYFKTIEDLR.N	2.4354	0.0282	535.6	27	19/48	1
13_1_a.1804.1804.2	Q9NYY8	1097.55	2	K.AGSFFWNLR.Q	1.725	0.0299	342.6	68	39037	1
13_1_a.1805.1805.2	ZHX1_HUMAN	944.552	2	K.LAKESGLAR.T	1.3847	0.0119	211.5	130	39037
13_1_a.1805.1805.3	MLL2_HUMAN	1417.71	3	K.DAASARDSERALR.D	1.2898	0.0343	413.7	5	23/48
13_1_a.1807.1807.3	ITA5_HUMAN	1455.71	3	R.EDCREMKIYLR.N	1.6562	0.0261	242.1	254	18/40
13_1_a.1807.1807.2	HME1_HUMAN	972.497	2	R.GGAGGGGRVER.D	1.3924	0.0191	210.2	307	39071
13_1_a.1808.1808.1	MDN1_HUMAN	504.289	1	K.RSGGK.E	1.0983	0.015	117.1	26	38876	2
13_1_a.1810.1810.1	CAN6_HUMAN	519.282	1	R.RMGR.P	1.4453	0.0531	149.5	16	38843	9
13_1_a.1811.1811.2	VPS18_HUMAN	850.434	2	K.EAICSSLK.A	1.4835	0.0019	236	47	38974
13_1_a.1811.1811.3	ZN516_HUMAN	1275.6	3	K.KGAEGSACAPGEAK.A	2.1416	0.1049	390.3	7	22/52
13_1_a.1812.1812.3	TTC1_HUMAN	2084.04	3	K.SILEKDPSIHQAREACMR.L	1.3944	0.0576	205	81	19/68
13_1_a.1812.1812.2	Q9UBG0	1389.72	2	-.MGPGRPAPAPWPR.H	1.9032	0.0693	177.5	46	39075
13_1_a.1814.1814.1	ABC3F_HUMAN	594.336	1	R.KAYGR.N	1.1083	0	238	5	38906
13_1_a.1815.1815.1	LIPI_HUMAN	629.308	1	K.QPGCPK.S	1.1496	0	92.8	126	38878
13_1_a.1816.1816.3	Q6ZMC9	2425.29	3	R.GSELCQTALSLHGRFRLLGNPR.R	1.5016	0.1621	287.1	80	25/84
13_1_a.1818.1818.3	Q16560	1070.51	3	R.TRDRDHDR.G	2.0111	0.1261	191.1	281	39049	1
13_1_a.1818.1818.2	Q4U1Z6	713.503	2	R.KVVVLR.A	1.6174	0.0749	388.4	11	38970	1
13_1_a.1819.1819.1	O95814	840.473	1	K.YIRFNK.T	1.4781	0.0493	176.4	4	38939
13_1_a.1820.1820.1	CSK22_HUMAN	843.414	1	-.MPGPAAGSR.A	1.0789	0.0739	67.2	304	38914
13_1_a.1821.1821.3	HXK1_HUMAN	1185.62	3	R.EIDRGSLNPGK.Q	1.6966	0.0223	117.5	359	13/40
13_1_a.1821.1821.2	Q8IWG2	789.421	2	R.ERSLER.D	1.8916	0.0165	201.8	116	38939
13_1_a.1822.1822.3	DRIM_HUMAN	2278.13	3	K.CQSFNQLVYHQNEIVQSLK.T	1.28	0.0385	179.5	159	18/72
13_1_a.1822.1822.2	Q8NFP1	1519.77	2	R.HPFVNFCTQVSIK.R	1.0109	0.0074	100.2	163	38953
13_1_a.1823.1823.3	STRC_HUMAN	1658.89	3	R.GSLRACIWAELQRR.M	1.6632	0.0979	246.4	483	18/52
13_1_a.1823.1823.2	GTPB5_HUMAN	1104.49	2	K.YELEMYEK.G	1.5049	0.0045	200.3	133	38943
13_1_a.1824.1824.1	Q9Y6P1	627.357	1	R.GLGGAPR.Q	1.1339	0.0007	119.8	9	38941
13_1_a.1826.1827.3	BTK_HUMAN	1108.67	3	R.KRWIHQLK.N	1.0278	0.1929	148	36	39049	1
13_1_a.1828.1828.3	Q5H943	1415.8	3	K.RILVNLSMVENK.L	1.8523	0.1658	371.3	294	18/44
13_1_a.1828.1828.2	AL3A2_HUMAN	943.543	2	K.REGANKLR.Y	1.4271	0.0056	378.8	42	39035
13_1_a.1829.1829.3	Q9UMA9	1692.83	3	-.PANASTVVGGDVEFVCK.V	1.5874	0.0182	193.9	78	19/64
13_1_a.1829.1829.2	FXL11_HUMAN	1127.68	2	R.IANVTLIDLR.G	1.8314	0.1688	257.7	29	39039
13_1_a.1831.1831.3	Q16530	1093.61	3	R.QTPTLGIHAR.P	1.9603	0.0386	240.1	34	13/36
13_1_a.1831.1831.2	LYST_HUMAN	728.441	2	K.SIAGPRK.F	1.7754	0.1086	254.5	63	38941
13_1_a.1832.1832.1	TENN_HUMAN	670.388	1	R.EPVLGR.K	1.2539	0.0192	74.6	26	38878
13_1_a.1835.1835.3	LSHR_HUMAN	1263.57	3	R.KDFSAYTSNCK.N	1.6986	0.0794	341.4	32	17/40
13_1_a.1835.1835.2	O14712	841.376	2	K.ETFDAMK.N	1.418	0.0031	192.7	394	38941	1
13_1_a.1836.1836.3	CAR11_HUMAN	1591.78	3	R.MNTVMLQLEEVER.E	1.9084	0.0835	338.3	63	21/48	1
13_1_a.1836.1836.2	CP24A_HUMAN	1061.54	2	K.ACIDNRLEK.Y	1.8727	0.0493	223.4	229	39037	1
13_1_a.1838.1838.2	Q9BZE0	984.449	2	K.RYSNSSDR.F	1.1138	0.0235	254.7	29	38974
13_1_a.1838.1838.3	MRE11_HUMAN	1476.79	3	K.MNMHKIPLHTVR.Q	1.5922	0.0927	396.6	80	18/44
13_1_a.1839.1839.2	CHST9_HUMAN	1293.69	2	K.ELKFPNFKDR.H	1.3238	0.1039	81.8	375	38978
13_1_a.1839.1839.3	NFIP1_HUMAN	1942	3	K.AEATIPLVPGRDEDFVGR.D	1.7753	0.1651	160.3	408	21/68
13_1_a.1840.1840.1	OR2J1_HUMAN	744.436	1	K.DVRGAVK.R	1.2536	0.0223	117	439	38941
13_1_a.1842.1842.2	Q96BF6	827.525	2	R.KRWLPK.I	1.6103	0.0034	217.5	81	38939
13_1_a.1842.1842.3	RRBP1_HUMAN	1240.73	3	K.ATQKGDPVAILK.R	1.3416	0.0057	196.1	135	15/44
13_1_a.1843.1843.2	ENPL_HUMAN	991.458	2	R.IKEDEDDK.T	2.4513	0.2904	830.1	2	39065	1
13_1_a.1843.1843.3	HGFL_HUMAN	1488.76	3	K.FPNDHKYTPTLR.N	1.7059	0.1288	311.4	35	17/44	1
13_1_a.1844.1844.2	O14712	854.47	2	K.KGGRGSHR.V	1.7623	0.0317	402.3	15	39035	1
13_1_a.1844.1844.3	Q86VJ0	1283.79	3	R.KELQLLIGELK.D	1.7547	0.0724	388.8	36	17/40	1
13_1_a.1845.1845.3	WDR74_HUMAN	1191.66	3	R.IQNPRGLEHK.V	1.2159	0.0104	133.4	654	13455
13_1_a.1845.1845.2	Q6ICG6	794.415	2	K.KVYDNR.V	1.373	0.0082	416.5	1	38970	2
13_1_a.1846.1846.3	EHMT1_HUMAN	1159.65	3	R.KGKTDSPWIK.P	2.5497	0.0936	313.6	110	17/36	3
13_1_a.1846.1846.2	PDZK3_HUMAN	774.447	2	K.QGSNKIK.L	2.048	0.019	288.2	108	39002
13_1_a.1847.1847.1	Q4U1Z6	712.41	1	K.PNVNLR.D	1.0689	0.1015	261.4	3	38939	1
13_1_a.1848.1848.2	NVL_HUMAN	876.505	2	R.QVFQRAK.N	1.8992	0.0628	350.3	7	39033
13_1_a.1848.1848.3	Q5T9J7	1313.74	3	K.LPCRLQQTNLK.L	1.9844	0.0643	393.9	53	19/40
13_1_a.1850.1850.3	DDX20_HUMAN	1717.85	3	R.AGRFGTLGLTVTYCCR.G	1.6413	0.0857	266.6	175	18/60
13_1_a.1850.1850.2	SCN1A_HUMAN	1145.65	2	R.RDSLFVPRR.H	1.77	0.0251	294.2	147	38976
13_1_a.1851.1851.3	TF65_HUMAN	1873.99	3	R.CIHSFQNLGIQCVKKR.D	1.4695	0.1284	190.6	80	17/60	1
13_1_a.1851.1851.2	ZN143_HUMAN	1248.51	2	K.AFRCEYDGCGK.L	1.245	0.0173	72.2	468	38888
13_1_a.1852.1852.1	CO4A6_HUMAN	738.451	1	K.GLPGIPGK.D	1.5187	0.2627	302.9	2	39004	1
13_1_a.1854.1854.3	OR2TB_HUMAN	1171.56	3	K.KVFACCSSAQK.V	1.7541	0.0405	187	33	14/40
13_1_a.1854.1854.2	CP007_HUMAN	780.4	2	R.AGAVGYSR.S	1.5861	0.0185	176.1	20	38974
13_1_a.1855.1855.3	HEPS_HUMAN	1836.91	3	K.TEGTWRLLCSSRSNAR.V	1.2501	0.0634	266.8	24	20/60
13_1_a.1855.1855.2	RPC4_HUMAN	1223.76	2	R.PLLTGARGLIGR.R	1.0848	0.0392	155.8	59	39043
13_1_a.1856.1856.3	Q14333	1756.91	3	K.TPTEVQFHTPLHPPR.L	2.0927	0.2105	247.4	149	21/56
13_1_a.1856.1856.2	DPOQ_HUMAN	1171.63	2	R.EAAALIVEEAR.M	1.5247	0.0238	196.8	78	39041
13_1_a.1859.1859.2	PDCL3_HUMAN	752.503	2	K.KGILPPK.E	1.082	0.1132	253.2	21	38941
13_1_a.1859.1859.3	Q5T750	1130.57	3	K.QPQFPPSCVK.G	1.0986	0.0342	208.1	373	14/36
13_1_a.1861.1861.3	Q9C073	1299.65	3	K.REPPEGCEKVR.V	1.592	0.1036	131.2	589	14/40
13_1_a.1861.1861.2	GRIP1_HUMAN	865.416	2	R.QASFQER.S	1.9854	0.1201	288.7	26	39002
13_1_a.1862.1862.2	RANG_HUMAN	1241.62	2	K.KAGSGKNDHAEK.V	1.8618	0.0544	322.9	7	15/22
13_1_a.1862.1862.3	Q5VTS4	1861.97	3	R.NANILEQLSCSITQLSK.V	1.9319	0.0708	291	17	22/64
13_1_a.1864.1864.3	APOE_HUMAN	1158.62	3	R.EGAERGLSAIR.E	1.8083	0.1295	152.8	236	15/40
13_1_a.1864.1864.2	EPPI_HUMAN	772.461	2	R.RCPKIR.E	1.3257	0.0321	219.2	29	38939
13_1_a.1866.1866.3	Q96L96	1182.62	3	R.ESPTVSPRGPR.K	1.7685	0.0044	131.1	285	14/40
13_1_a.1866.1866.2	M6PBP_HUMAN	788.437	2	R.ERVASAR.E	2.0361	0.0516	296.7	32	38972
13_1_a.1867.1867.3	Q6ZQQ4	1375.69	3	R.GAPHLPDGAAWQR.R	2.0897	0.0861	759.7	6	22/48
13_1_a.1867.1867.2	ADRB3_HUMAN	916.448	2	R.VGADAEAQR.C	2.1682	0.0357	542.5	1	13/16
13_1_a.1868.1868.2	WFDC3_HUMAN	862.493	2	R.KQSCLKR.C	1.6211	0.0027	406.7	14	39002
13_1_a.1868.1868.3	Q96N96	1295.56	3	K.EMGMEISENQK.K	1.8177	0.0316	506	5	20/40
13_1_a.1869.1869.2	Q68DI8	770.415	2	R.EGLAPQR.K	1.3915	0.0411	251.6	20	38972
13_1_a.1869.1869.3	RGS6_HUMAN	1155.57	3	R.LGHCEGERVR.A	1.674	0.0746	279.3	76	16/36
13_1_a.1870.1870.3	Q71RS6	1126.49	3	K.KCSPCCACLAK.A	1.5742	0.0051	194.6	198	16/40
13_1_a.1870.1870.2	SSF1_HUMAN	751.356	2	K.FPNMSR.L	1.362	0.0706	207.3	32	38939
13_1_a.1871.1871.3	PTN3_HUMAN	1231.71	3	K.KFFIHQRQK.Q	2.0745	0.0349	270.9	1	15/32	2
13_1_a.1871.1871.2	RL8_HUMAN	821.463	2	R.KGAGSVFR.A	1.7352	0.1015	161.2	130	38943
13_1_a.1872.1872.3	UTX_HUMAN	1664.98	3	K.LQLHELTKLPAFVR.V	1.8445	0.0249	276.3	151	20/52	2
13_1_a.1872.1872.2	Q15516	1109.74	2	R.LLKLPILGSR.T	1.6206	0.0091	305.5	7	13/18
13_1_a.1874.1874.1	CD008_HUMAN	546.288	1	K.EVNGK.Q	1.206	0.041	31.3	187	38815
13_1_a.1875.1875.2	Q8NC48	1213.66	2	K.ATRVGGEPGITR.A	1.7766	0.0284	349.2	2	16/22	1
13_1_a.1875.1875.3	DHE4_HUMAN	1819.91	3	K.DIVHSALAYTMERSAR.Q	1.9854	0.0909	319.3	14	24/60
13_1_a.1876.1876.3	Q8TBV8	1734.93	3	R.SPKPCLAQPAQAPGTLR.R	1.7121	0.0629	286.8	14	23/64	1
13_1_a.1876.1876.2	Q5T117	1155.47	2	-.MLSDGCGSEEK.I	1.3116	0.0594	209.1	45	39071	1
13_1_a.1877.1877.3	Q86VR7	1709.83	3	R.AYQATDPSSVVSVGGGSK.T	1.8998	0.073	337.6	14	27/68
13_1_a.1877.1877.2	ZSWM3_HUMAN	1138.64	2	R.FPENLLLHR.V	1.3337	0.0526	242.4	19	39037
13_1_a.1879.1880.2	Q9HCC7	1220.58	2	-.MASPSRNSQSR.R	1.9214	0.0943	197.7	15	39041
13_1_a.1879.1880.3	HSPB7_HUMAN	1830.89	3	K.CQLPEDVDPTSVTSALR.E	2.2396	0.1167	298.5	10	22/64	4
13_1_a.1883.1883.3	Q68CJ6	1066.5	3	R.QVAEGMFER.A	1.4259	0.1191	228.2	55	11994
13_1_a.1883.1883.2	PHX2A_HUMAN	710.456	2	R.KPGPALK.T	1.555	0.027	411.6	5	38941
13_1_a.1884.1884.3	ECH1_HUMAN	1633.9	3	R.RLTGSNYPGLSISLR.L	1.802	0.0868	385.6	7	23/56
13_1_a.1884.1884.2	SIA4A_HUMAN	1089.55	2	R.CAVVGNSGNLR.E	1.5891	0.1113	319.1	9	14/20	1
13_1_a.1885.1885.1	Q9H6D8	756.375	1	R.QNGPGQR.V	1.1513	0.1033	137.5	25	38941
13_1_a.1887.1887.3	GALT5_HUMAN	1879.97	3	R.AHPASTAVPKSGEAMALNK.T	1.8221	0.1276	286.8	28	22/72
13_1_a.1887.1887.2	Q6ZR48	1252.53	2	R.ESLADSWGECR.S	1.1564	0.0246	168	80	39010
13_1_a.1888.1888.3	Q68DM6	1642.88	3	K.LECIKTSICNHLLR.G	1.7945	0.0135	526.9	31	22/52	1
13_1_a.1888.1888.2	PKN1_HUMAN	1096.67	2	R.SLGPVELLLR.G	1.1793	0.0024	201	116	39039
13_1_a.1890.1890.3	RS3A_HUMAN	1167.6	3	R.KKMMEIMTR.E	1.5603	0.069	343.8	10	15/32
13_1_a.1890.1890.2	DNM1L_HUMAN	777.381	2	K.EAADMLK.A	1.6321	0.1268	198.8	54	38972
13_1_a.1891.1891.2	Q8N2Q8	1203.65	2	R.QKFTEPGAGLR.A	1.7075	0.0134	168.1	365	39041	1
13_1_a.1891.1891.3	RAB5A_HUMAN	1805.94	3	K.LPKNEPQNPGANSARGR.G	1.5938	0.1009	227.6	152	19/64
13_1_a.1892.1892.3	Q71M24	1261.69	3	R.VSPNQKLFSNK.A	1.5505	0.0062	269.8	98	15/40
13_1_a.1892.1892.2	MRP4_HUMAN	840.473	2	K.QVYFKR.N	1.4547	0.0738	644.1	3	39000
13_1_a.1893.1893.3	Q8TD55	1103.68	3	R.RPPTRVHLK.E	1.9659	0.0412	427	8	16/32
13_1_a.1893.1893.2	GYS2_HUMAN	736.435	2	K.EKFGKK.L	1.4283	0.0901	222.2	133	38939
13_1_a.1894.1894.2	NUP50_HUMAN	898.51	2	K.GLVVPSGGGR.F	1.4298	0.0317	207.4	31	39008	1
13_1_a.1894.1894.3	ARD1H_HUMAN	1347.67	3	K.RDLTQMADELR.R	1.513	0.0549	167.2	217	13/40
13_1_a.1895.1895.3	Q5JT25	1274.63	3	K.RQVTAEQGEEK.S	1.4525	0.0114	175.4	743	14946
13_1_a.1895.1895.2	CAC1H_HUMAN	848.404	2	R.RDNGMQK.C	1.5284	0.0088	253.4	61	38941
13_1_a.1898.1898.3	Q4U1Z6	1165.62	3	K.LGGPCPPHFLK.E	1.4371	0.1419	111.8	424	14946	2
13_1_a.1898.1898.2	Q9Y5X6	776.391	2	K.KCCLGPR.N	1.6888	0.003	274.8	38	38972
13_1_a.1899.1899.2	Q32M78	817.478	2	R.KTAELQK.N	1.6768	0.0245	180.9	365	38941
13_1_a.1899.1899.3	C8AP2_HUMAN	1228.74	3	K.KGEIIILWTR.N	1.5888	0.0008	339.1	13	17/36
13_1_a.1901.1901.3	SYPM_HUMAN	1795.99	3	K.DANKFGYPFVIIAGKR.A	1.5183	0.0298	124.8	713	18/60
13_1_a.1901.1901.2	COCA1_HUMAN	1197.58	2	K.DSAMGPRGPPGR.P	1.7847	0.027	109.8	504	39012
13_1_a.1902.1902.1	CO4A2_HUMAN	783.436	1	R.GAPGVTGPK.G	1.1637	0.0016	99.8	214	38914	1
13_1_a.1903.1903.2	GP142_HUMAN	1026.59	2	R.RGRSGLQPR.V	1.9706	0.0442	345.3	34	39067	1
13_1_a.1903.1903.3	CM018_HUMAN	1540.8	3	K.SRIRGTEDWAPPR.F	1.598	0.0994	266	229	19/48
13_1_a.1904.1904.1	CO6A3_HUMAN	776.353	1	R.DGVGSEGR.R	1.3009	0.0766	134.6	24	38943
13_1_a.1906.1906.1	CJ093_HUMAN	575.278	1	K.EEAAR.F	1.4154	0.0655	150.4	8	38906	17
13_1_a.1907.1907.1	RIN1_HUMAN	605.337	1	R.KSNTR.Q	1.0092	0.0768	92	14	38876	2
13_1_a.1908.1908.3	TRPM7_HUMAN	1057.55	3	K.EHASRSSRK.I	1.4143	0.0778	215.8	110	12024
13_1_a.1908.1908.2	Q76P92	704.405	2	K.ERGSKK.D	1.1512	0.0007	157.2	122	38878	1
13_1_a.1909.1909.2	HPLN2_HUMAN	700.446	2	R.RGAVVAK.V	1.2274	0.0145	125.2	489	38941
13_1_a.1909.1909.3	Q8TD55	1051.56	3	K.SSGGLLGFWK.D	1.2793	0.0035	144	441	13/36
13_1_a.1910.1910.3	DCDC2_HUMAN	1426.84	3	K.ASSLPPIVGSRKSK.G	1.6031	0.0018	156.1	380	18/52
13_1_a.1910.1910.2	PLS3_HUMAN	951.453	2	K.FSIQDADR.Q	1.6977	0.0593	120.2	475	38974
13_1_a.1911.1911.3	NIPS1_HUMAN	1853.05	3	R.LCSISVTARRLLGGPGPR.A	2.1574	0.0711	372.6	4	24/68
13_1_a.1911.1911.2	DEF5_HUMAN	1236.59	2	R.ESLSGVCEISGR.L	2.165	0.1769	133.8	377	39043
13_1_a.1912.1912.1	Q6FIB3	757.395	1	K.NKGHSSK.K	1.3074	0.1506	73.7	131	38910	2
13_1_a.1914.1914.2	Q86VS1	760.456	2	R.KLATAEK.Q	1.7605	0.0148	138.2	406	38941
13_1_a.1914.1914.3	TF3C2_HUMAN	1141.59	3	R.RPGFSPTSHR.L	1.768	0.0073	281.9	4	17/36
13_1_a.1915.1915.1	ASTN_HUMAN	515.294	1	R.VGSPR.S	1.1141	0.0644	139.4	20	38876	1
13_1_a.1916.1916.3	ZN473_HUMAN	1959.91	3	K.CEKTFSCSKYLTQHER.I	1.5179	0.051	145.1	288	17/60
13_1_a.1916.1916.2	CALX_HUMAN	1307.55	2	K.EEEEEKEEEK.D	2.5461	0.2622	469.3	3	14/18
13_1_a.1918.1918.1	Q4U1Z6	786.508	1	K.LKVEAVK.I	1.4905	0.0023	148	62	38910	4
13_1_a.1920.1920.3	PDLI5_HUMAN	1363.62	3	R.SMPESLDSPTSGR.P	1.3567	0.0153	392.7	164	20/48	1
13_1_a.1920.1920.2	ANPRC_HUMAN	909.563	2	R.RLLPPGTR.F	1.3244	0.0509	334.3	42	39035
13_1_a.1922.1922.3	KLOT_HUMAN	1180.64	3	R.VLPNGSAGVPNR.E	1.5436	0.0973	534	2	18/44
13_1_a.1922.1922.2	LU_HUMAN	787.42	2	K.TAEIEPK.A	1.6452	0.0526	393.8	35	38972
13_1_a.1923.1923.2	Q6ZWG2	942.475	2	R.RSGDSPAPR.I	1.5474	0.1326	203.5	58	39067
13_1_a.1923.1923.3	Q7L9B9	1414.7	3	-.MGSTLGCHRSIPR.D	1.651	0.0245	191.9	193	18/48
13_1_a.1924.1924.3	Q9NQW6	1433.7	3	R.QIEPANREFCAR.R	2.0229	0.1595	269.3	2	16/44
13_1_a.1924.1924.2	FLNB_HUMAN	955.448	2	K.VDPSHDASK.V	1.4804	0.0155	114.6	353	38945	2
13_1_a.1926.1926.3	LIPB2_HUMAN	1199.7	3	K.ELGIKHPLHR.K	1.6815	0.0773	290.6	31	15/36
13_1_a.1926.1926.2	S12A5_HUMAN	800.437	2	R.KNPANTR.L	1.5865	0.0342	226.1	30	38972
13_1_a.1927.1927.2	K0020_HUMAN	1131.61	2	K.QMWEILRR.K	1.5735	0.0716	387.7	19	39035
13_1_a.1927.1927.3	DOK4_HUMAN	1698.99	3	R.VLLEMEKNVRLLNK.G	1.7347	0.0468	528.1	27	23/52
13_1_a.1928.1928.3	Q86SI9	1362.68	3	K.PPSHVENGQELR.L	1.6109	0.1392	227.4	909	17/44
13_1_a.1928.1928.2	Q9H8U1	908.579	2	K.LRAPKAPR.T	1.4482	0.0005	333.3	19	39004
13_1_a.1930.1930.3	PHC3_HUMAN	1475.77	3	R.PSGPDGAAREHILR.Q	1.2543	0.114	131.7	147	17/52
13_1_a.1930.1930.2	SC6A6_HUMAN	983.527	2	K.PSPGKSPGTR.P	1.189	0.1198	153.1	25	39069	1
13_1_a.1931.1931.2	GLU2B_HUMAN	987.474	2	K.EEAEKPER.E	1.7939	0.1582	184.7	72	39035
13_1_a.1931.1931.3	O43154	1482.85	3	R.LRFPIADLRPER.D	1.3332	0.1172	93.6	793	16407
13_1_a.1932.1932.3	Q5TA12	1211.49	3	K.SPCYPGEESDK.H	2.2343	0.0526	223.3	83	17/40
[truncated: 39,495 more rows]
